# Supplementary material for: Loss of Kat2a enhances transcriptional noise and depletes acute myeloid leukemia stem-like cells
Source: eLife journal article supplement (doi:10.7554/elife.51754), 2020-01-27
Supplement: supp [file elife-51754-supp-v1.zip]

Archive with 25 entries (25 files):
- elife_poa_e51754_Figure_5_figure_supplement_2.pdf
- elife_poa_e51754_Figure_5_figure_supplement1.pdf
- elife_poa_e51754_Supplementary_file_6.xlsx
- elife_poa_e51754_Figure_3_figure_supplement_1.pdf
- elife_poa_e51754_Figure_3_figure_supplement_1_source_code_1.zip
- elife_poa_e51754_Transparent_Reporting_File.docx
- elife_poa_e51754_Supplementary_file_2.xlsx
- elife_poa_e51754_Supplementary_file_7.xlsx
- elife_poa_e51754_Supplementary_file_1.xlsx
- elife_poa_e51754_Figure_4_figure_supplement_1.pdf
- elife_poa_e51754_Figure_1_figure_supplement_1.pdf
- elife_poa_e51754_Figure_4_source_code_1.zip
- elife_poa_e51754_Figure_3_source_data_1.xlsx
- elife_poa_e51754_Figure_1_figure_supplement_2.pdf
- elife_poa_e51754_Figure_1_figure_supplement_1_source_data_1.xlsx
- elife_poa_e51754_Figure_6_source_data_1.xlsx
- elife_poa_e51754_Figure_3_source_code_1.zip
- elife_poa_e51754_Supplementary_file_4.xlsx
- elife_poa_e51754_Supplementary_file_5.xlsx
- elife_poa_e51754_Figure_5_source_data_1.xlsx
- elife_poa_e51754_Figure_3_source_code_2.zip
- elife_poa_e51754_Figure_1_figure_supplement_2_source_data_1.xlsx
- elife_poa_e51754_Figure_4_figure_supplement_2.pdf
- elife_poa_e51754_Figure_2_figure_supplement_1.pdf
- elife_poa_e51754_Supplementary_file_3.xlsx
