# Supplementary material for: Loss of Kat2a enhances transcriptional noise and depletes acute myeloid leukemia stem-like cells
Source: eLife journal article supplement (doi:10.7554/elife.51754), 2020-01-27
Supplement: supp [file elife-51754-supp-v1.zip › elife_poa_e51754_Figure_1_figure_supplement_1_source_data_1.xlsx]

## Sheet: Sheet1
	G					M					GM					E					Meg					MegE					Mix
HSC-Kat2aWT	0	0	0	0	0	0	0	0	0	0	0.23	0.25	0.43	0.25	0.31	0	0	0	0	0	0	0	0	0	0.03	0	0	0	0	0	0.06	0.06	0.05	0.05	0.06
HSC-Kat2a KO	0	0	0	0	0	0	0	0	0	0.01	0.3	0.29	0.33	0.28	0.32	0	0	0	0	0	0	0	0	0	0.01	0	0	0	0	0	0.05	0.02	0.04	0.02	0.02
MPP-Kat2aWT	0	0.01	0	0	0	0.01	0	0	0	0.01	0.24	0.2	0.23	0.19	0.26	0	0	0	0	0	0	0	0	0	0.01	0	0	0	0	0	0.14	0.03	0.02	0.03	0.1
MPP-Kat2a KO	0	0	0	0	0	0	0	0	0	0	0.2	0.23	0.16	0.21	0.26	0	0	0	0	0	0	0	0.01	0	0	0	0	0	0	0	0.05	0.01	0.02	0.02	0.05
GMP-Kat2aWT	0.15	0.03	0.07	0.03		0.1	0.01	0.04	0		0.23	0.06	0.12	0.05		0	0	0	0		0	0	0	0		0	0	0	0		0	0	0	0
GMP-Kat2a KO	0.15	0.06	0.08	0.02		0.06	0.01	0.04	0.01		0.13	0.14	0.17	0.09		0	0	0	0		0	0	0	0		0	0	0	0		0	0	0	0
MEP-Kat2aWT	0	0	0	0	0	0	0	0	0	0	0.02	0.02	0.02	0.04	0.02	0.05	0.01	0.02	0.01	0.01	0.02	0.01	0.03	0	0.03	0.01	0	0	0.01	0.03	0.01	0.01	0	0	0.02
MEP-Kat2a KO	0	0	0	0	0	0.01	0	0	0	0	0.02	0.04	0.01	0.02	0.02	0.03	0	0	0	0	0.01	0.02	0	0.01	0.04	0.01	0	0	0	0.01	0.01	0.01	0	0	0.02
