# Supplementary material for: Loss of Kat2a enhances transcriptional noise and depletes acute myeloid leukemia stem-like cells
Source: eLife journal article supplement (doi:10.7554/elife.51754), 2020-01-27
Supplement: supp [file elife-51754-supp-v1.zip › elife_poa_e51754_Figure_1_figure_supplement_2_source_data_1.xlsx]

## Sheet: Sheet1
	Compact			Mixed			Disperse
Kat2a WT	0.589666	0.638021	0.646259	0.319149	0.291667	0.261905	0.0911854	0.070313	0.091837
Kat2a KO	0.437811	0.392265	0.415525	0.378109	0.475138	0.401826	0.18408	0.132597	0.182648
