# Supplementary material for: Loss of Kat2a enhances transcriptional noise and depletes acute myeloid leukemia stem-like cells
Source: eLife journal article supplement (doi:10.7554/elife.51754), 2020-01-27
Supplement: supp [file elife-51754-supp-v1.zip › elife_poa_e51754_Figure_3_source_data_1.xlsx]

## Sheet: Sheet1
#GeneID	kON (Kat2aKO)	kOFF (Kat2aKO)	kRNA(Kat2aKO)	GOF (Kat2aKO)	kON (Kat2aWT)	kOFF (Kat2aWT)	kRNA(Kat2aWT)	GOF (Kat2aWT)	sizeBurst (Kat2aKO)	freqBurst (Kat2aKO)	dutyCycle (Kat2aKO)	sizeBurst (Kat2aWT)	freqBurst (Kat2aWT)	dutyCycle (Kat2aWT)	sizeBurst ratio	freqBurst ratio	dutyCycle ratio	pSize	pFreq	pDuty	p-value	avg (Kat2aKO)	CV (Kat2aKO)	avg (Kat2aWT)	CV (Kat2aWT)	avgRatio	cvRatio	Kat2a_targets	Ac_targets	fBurst_ratio	sBurst_ratio
Arpc4	28.114	491.596	31.7549	0	46.0466	5594.02	227.443	0	0.0647	26.5754	0.0541	0.0407	45.6345	0.0082	-0.6681	0.78	-2.7287	0	0	0	3.4e-06	1.7132	0.6785	1.848	0.5513	-0.0729437	0.230727	1	1	-0.417647	0.589681
Cmpk1	24.8924	121.559	5.4284	0	30.3954	1658.59	55.9256	0	0.0447	20.6452	0.17	0.0337	29.8339	0.018	-0.4063	0.5311	-3.2371	0	0	0	1.57e-07	0.9209	1.1743	1.0061	1.0192	-0.0846834	0.152178	1	1	-0.307995	0.326409
Msrb1	30.0347	1370.58	87.1589	0	42.8943	3681.24	200.574	0	0.0635	29.3601	0.0215	0.0549	42.3566	0.0115	-0.2103	0.5287	-0.9065	0	0	0	0	1.853	0.6755	2.2892	0.4466	-0.190547	0.512539	1	1	-0.306835	0.156648
Hsp90ab1	23.4207	207.186	9.9735	0	32.0835	539.101	25.2378	0	0.0483	21.0212	0.1013	0.0469	30.2618	0.0561	-0.0441	0.5257	-0.852	1.77e-05	0	0	0	1.0071	1.1885	1.4115	0.8886	-0.286504	0.337497	1	1	-0.305355	0.0298507
Dazap2	27.5824	270.234	15.5407	0	35.5907	3731.4	128.414	0	0.0578	25.0095	0.0924	0.0344	35.2323	0.0094	-0.747	0.4944	-3.2905	0	0	0	0	1.4351	0.8475	1.2117	0.8775	0.184369	-0.034188	1	1	-0.290154	0.680233
Eif5	24.4171	287.34	8.6034	0	31.9913	1074.64	30.7039	0	0.0299	22.4807	0.0785	0.0286	31.0498	0.0289	-0.063	0.4659	-1.4426	3.38e-26	0	0	1.01e-24	0.6695	1.5222	0.8877	1.1421	-0.245804	0.332808	1	1	-0.275979	0.0454545
Atp5o	24.0508	485.271	24.5603	0	32.1044	1445.27	49.8382	0	0.0505	22.8934	0.0475	0.0346	31.3966	0.0217	-0.5466	0.4557	-1.131	0	0	0	1.16e-11	1.1545	1.0336	1.0842	0.9759	0.0648404	0.0591249	1	1	-0.270832	0.459538
Psmd6	23.9719	168.224	3.7111	0	29.1316	1484.5	25.0059	0	0.022	20.9509	0.1252	0.0168	28.5552	0.0193	-0.3906	0.4467	-2.6959	0	0	0	2.13e-05	0.461	1.8643	0.479	1.6518	-0.0375783	0.128648	1	1	-0.266302	0.309524
Rab11b	26.0283	422.477	14.8901	0	33.779	2191.54	48.3653	0	0.0353	24.5089	0.0581	0.0221	33.242	0.0151	-0.6728	0.4397	-1.9382	0	0	0	2.65e-12	0.8632	1.2631	0.7333	1.2879	0.177144	-0.0192562	1	1	-0.262713	0.597285
Hspe1	26.2584	288.944	2.8584	3.16e-17	32.7423	2748.51	22.656	1.85e-18	0.0099	24.0623	0.0835	0.0082	32.3375	0.0118	-0.263	0.4264	-2.8261	0	0	0	4.91e-05	0.2379	2.7495	0.2665	2.3851	-0.107317	0.152782	1	1	-0.255901	0.207317
Ginm1	26.9143	144.272	1.7657	4.14e-21	32.1123	569.478	3.3927	6.43e-10	0.0123	22.664	0.1571	0.006	30.3836	0.0533	-1.0369	0.4229	-1.5584	0	0	0	3.03e-14	0.2765	2.5632	0.18	2.984	0.536111	-0.141019	1	1	-0.254071	1.05
Lamtor3	25.855	218.579	2.6011	4.4e-24	31.3161	2450	25.6828	2.6e-19	0.0119	23.1033	0.1066	0.0105	30.9042	0.0126	-0.1846	0.4197	-3.079	0	0	0	1.89e-05	0.2753	2.5476	0.3242	2.1109	-0.150833	0.206879	1	1	-0.252422	0.133333
Zfp330	26.7328	617.046	4.4578	5.36e-09	34.4945	3544.86	22.0494	5.53e-12	0.0072	25.6041	0.0416	0.0062	34.1427	0.0097	-0.2201	0.4152	-2.0967	0	0	0	2.02e-05	0.1847	3.1342	0.2126	2.6698	-0.131232	0.173946	1	1	-0.250086	0.16129
Coro1a	36.334	1234.24	72.6179	0	47.3654	4227.21	247.028	0	0.0591	35.2606	0.0285	0.0587	46.8133	0.0111	-0.0102	0.4089	-1.3671	0.000934	0	0	0	2.0626	0.5751	2.7369	0.313	-0.246374	0.83738	1	1	-0.246782	0.00681431
Gnb1	25.2305	474.348	6.0834	8.81e-21	31.8482	2188.97	21.8656	5.82e-22	0.0128	23.9333	0.0505	0.01	31.3738	0.0143	-0.3602	0.3905	-1.8168	0	0	0	6.8e-05	0.3049	2.4216	0.3133	2.2159	-0.0268114	0.0928291	1	1	-0.237156	0.28
Tmed7	25.144	183.643	3.1065	0	29.2212	2742.61	34.3094	3.8e-24	0.0169	22.0694	0.1204	0.0125	28.8979	0.0106	-0.4364	0.3889	-3.5093	0	0	0	9.2e-05	0.3698	2.0953	0.362	1.963	0.021547	0.0673968	1	1	-0.236297	0.352
Hprt	29.1506	753.323	36.1451	0	36.7837	5129.98	199.57	0	0.0479	28.0269	0.0373	0.0388	36.5054	0.0071	-0.3041	0.3813	-2.3838	0	0	0	2.72e-06	1.3253	0.9151	1.4246	0.7835	-0.0697038	0.167964	1	1	-0.232253	0.234536
Tmem234	26.2962	475.24	14.5456	0	32.6541	2921.18	71.7084	0	0.0305	24.8966	0.0527	0.0245	32.2671	0.0111	-0.3192	0.3741	-2.2455	0	0	0	5.38e-07	0.7581	1.4233	0.7889	1.2438	-0.0390417	0.144316	1	1	-0.228422	0.244898
Tnfaip8	24.0389	232.933	4.4523	0	28.8418	1242.27	21.755	0	0.0191	21.784	0.0937	0.0176	28.1633	0.0227	-0.1227	0.3705	-2.0477	0	0	0	5.48e-07	0.417	2.0015	0.4899	1.667	-0.148806	0.20066	1	1	-0.226511	0.0852273
Idh3b	24.9251	315.986	2.6845	1.23e-11	30.2048	2062.14	13.3407	1.34e-09	0.0085	23.0928	0.0731	0.0065	29.7576	0.0144	-0.3913	0.3658	-2.3416	0	0	0	2.87e-06	0.1955	3.0306	0.1928	2.8156	0.0140041	0.0763603	1	1	-0.22397	0.307692
Rpl23	30.8737	432.325	28.9195	0	37.6289	2712.35	167.779	0	0.0668	28.7896	0.0669	0.0619	37.0874	0.0137	-0.109	0.3654	-2.29	0	0	0	0	1.9215	0.6575	2.2872	0.4871	-0.15989	0.349825	1	1	-0.223736	0.0791599
Dcp2	25.3199	337.715	3.9322	9.44e-19	31.6496	714.535	4.064	3.82e-09	0.0117	23.5446	0.0701	0.0057	30.2877	0.0424	-1.0339	0.3633	-0.7272	0	0	0	6.8e-14	0.2736	2.5592	0.1713	2.9298	0.597198	-0.126493	1	1	-0.222635	1.05263
Tbrg1	25.4971	714.021	7.2609	8.15e-23	32.3554	1436.75	11.1416	1.42e-12	0.0102	24.6118	0.0347	0.0078	31.6214	0.022	-0.3884	0.3616	-0.6609	0	0	0	9.22e-06	0.2511	2.6508	0.2449	2.4798	0.0253165	0.0689572	1	1	-0.221673	0.307692
Pomp	25.1991	595.592	26.6925	0	31.4908	2139.24	70.0333	0	0.0448	24.1565	0.0406	0.0327	31.0181	0.0145	-0.4535	0.3607	-1.483	0	0	0	6.16e-10	1.0763	1.0928	1.0151	1.0296	0.0602896	0.0613831	1	1	-0.221213	0.370031
Tm9sf2	28.2934	172.139	1.7882	4.08e-20	31.3693	2523.19	24.4907	9.24e-16	0.0104	24.2718	0.1408	0.0097	30.9704	0.0123	-0.1057	0.3516	-3.5119	0	0	0	1.61e-05	0.2503	2.6516	0.3009	2.1739	-0.168162	0.219743	1	1	-0.21629	0.0721649
Ap2m1	28.1727	526.071	16.229	0	34.8852	1375.58	30.4698	0	0.031	26.7301	0.0508	0.0221	33.9981	0.0248	-0.4852	0.347	-1.0346	0	0	0	4.63e-09	0.8251	1.2673	0.7496	1.2339	0.10072	0.0270686	1	1	-0.213777	0.402715
Tmem30a	25.7734	952.101	15.7285	0	32.1875	3201.15	44.878	1.48e-25	0.0165	25.0844	0.0265	0.014	31.84	0.01	-0.2398	0.3441	-1.4087	0	0	0	0.000138	0.4148	1.9807	0.4447	1.7558	-0.0672363	0.12809	1	1	-0.212173	0.178571
Ccdc53	27.5171	133.047	0.9889	6.65e-10	29.7964	982.663	7.844	1.52e-14	0.0075	22.7834	0.1711	0.008	28.8933	0.0296	0.0889	0.3428	-2.533	2.37e-21	0	0	8.05e-06	0.1688	3.2953	0.229	2.585	-0.262882	0.274778	1	1	-0.211464	-0.0625
Thrap3	25.532	216.573	1.9056	2.36e-11	29.5341	1230.36	9.3664	2.76e-08	0.0088	22.8256	0.1054	0.0076	28.8261	0.0234	-0.2108	0.3367	-2.1697	0	0	0	2.19e-05	0.2005	2.9484	0.2189	2.6076	-0.0840566	0.130695	1	1	-0.208162	0.157895
Rpl12	24.8515	1122.75	47.8802	0	31.2361	1725.13	77.4991	0	0.0424	24.2872	0.0219	0.0448	30.6603	0.0179	0.0795	0.3362	-0.2914	0	0	0	0	1.0239	1.1533	1.3735	0.8538	-0.254532	0.350785	1	1	-0.207862	-0.0535714
Rpl10a	30.3674	1330.79	88.697	0	38.206	1968.26	126.167	0	0.0668	29.6744	0.0223	0.0645	37.4608	0.0191	-0.0506	0.3362	-0.2255	3.42e-10	0	0	0	1.971	0.6703	2.4096	0.4949	-0.182022	0.354415	1	1	-0.207855	0.0356589
Gnai2	25.5715	857.262	36.0709	0	33.383	506.5	20.9169	0	0.0421	24.8163	0.029	0.0416	31.294	0.0617	-0.0151	0.3346	1.0873	0	0	0	1.23e-23	1.0444	1.0894	1.29	0.8326	-0.190388	0.308431	1	1	-0.206995	0.0120192
Ywhaq	26.8367	549.508	25.1909	0	33.0401	1321.86	38.3822	0	0.0458	25.5722	0.0467	0.029	32.2102	0.0244	-0.6603	0.3329	-0.9347	0	0	0	0	1.1713	0.9887	0.932	1.087	0.25676	-0.0904324	1	1	-0.206084	0.57931
Sugt1	26.1868	244.656	2.3636	2.21e-15	29.9674	3622.78	34.3507	8.54e-18	0.0097	23.6208	0.0967	0.0095	29.7082	0.0082	-0.0278	0.3308	-3.5566	0.000964	0	0	3.45e-05	0.2269	2.7832	0.2816	2.3519	-0.194247	0.183384	1	1	-0.204906	0.0210526
Ndufb10	25.5831	640.076	23.901	0	31.5641	1536.84	50.1465	0	0.0373	24.5879	0.0386	0.0326	30.9176	0.0202	-0.1932	0.3305	-0.9369	0	0	0	1.7e-08	0.9175	1.2132	1.01	1.0292	-0.0915842	0.17878	1	1	-0.204728	0.144172
Wdfy1	26.1495	274.853	1.8634	1.87e-08	30.2661	3287.25	23.3595	9.98e-12	0.0068	23.8591	0.0871	0.0071	29.9648	0.0091	0.0703	0.3287	-3.2544	6.6e-13	0	0	1.18e-05	0.1609	3.3929	0.2118	2.6876	-0.240321	0.262427	1	1	-0.203762	-0.0422535
Ndufc2	26.1963	687.81	20.7269	0	31.9334	2886.36	65.8335	0	0.0301	25.2173	0.0369	0.0228	31.5666	0.0109	-0.3983	0.324	-1.7543	0	0	0	6.25e-06	0.7569	1.3719	0.7203	1.2939	0.0508122	0.0602829	1	1	-0.20114	0.320175
Cd79b	26.7874	221.066	2.1621	1.15e-17	30.3898	1796.45	12.0766	2.67e-11	0.0098	23.8793	0.1081	0.0067	29.8634	0.0166	-0.5422	0.3226	-2.6985	0	0	0	2.11e-07	0.2324	2.8748	0.1991	2.8012	0.167253	0.0262745	1	1	-0.200382	0.462687
Tmem123	25.784	931.334	10.9686	2.28e-23	31.7229	2141.69	13.4884	7.41e-10	0.0118	25.0735	0.027	0.0063	31.2436	0.0146	-0.8967	0.3174	-0.8862	0	0	0	1.8e-13	0.2953	2.4611	0.197	2.7828	0.498985	-0.115603	1	1	-0.197484	0.873016
Lgals1	22.4879	399.278	29.4553	0	26.9832	1464.46	91.5019	0	0.0737	21.2779	0.0534	0.0625	26.488	0.0181	-0.2382	0.316	-1.5596	0	0	0	0.00564	1.5666	0.9538	1.6556	0.8817	-0.0537569	0.0817738	1	1	-0.196697	0.1792
Pgap2	27.3246	683.239	4.9864	3.01e-11	32.8249	2426.57	15.3904	1.33e-10	0.0073	26.2559	0.0385	0.0063	32.3667	0.0134	-0.2048	0.3019	-1.522	0	0	0	1.43e-05	0.1915	3.0514	0.2044	2.6968	-0.0631115	0.131489	1	1	-0.188799	0.15873
Ewsr1	27.9671	1741.97	72.5709	0	34.1622	3934.92	128.505	0	0.0416	27.5088	0.0158	0.0327	33.8414	0.0086	-0.3501	0.2989	-0.8782	0	0	0	1.05e-08	1.144	1.0042	1.1036	0.9395	0.0366075	0.0688664	1	1	-0.187126	0.272171
Bsg	29.3252	1071.96	36.8353	0	35.3431	4880.25	126.561	0	0.0345	28.5171	0.0265	0.0259	35.0619	0.0072	-0.417	0.2981	-1.8786	0	0	0	4.17e-08	0.9711	1.1647	0.9051	1.1184	0.0729201	0.0413984	1	1	-0.186664	0.332046
Pfdn2	29.2688	3053.94	89.5205	0	35.6946	6282.58	133.458	0	0.0293	28.9844	0.0096	0.0212	35.4732	0.0057	-0.4653	0.2915	-0.7503	0	0	0	1.29e-09	0.8518	1.2848	0.7572	1.2557	0.124934	0.0231743	1	1	-0.182921	0.382075
Rpl6	34.2396	1710.67	101.645	0	42.6432	1058.65	59.0652	0	0.0598	33.5392	0.0196	0.056	40.9655	0.0386	-0.0932	0.2886	0.981	0	0	0	5.88e-23	1.9916	0.6156	2.2796	0.4758	-0.126338	0.293821	1	1	-0.181282	0.0678571
Derl1	26.6129	524.716	7.0527	0	31.1628	3872.66	49.5244	9.54e-24	0.0135	25.3061	0.0482	0.0128	30.9009	0.008	-0.0759	0.2882	-2.5902	4.46e-27	0	0	8.87e-06	0.3394	2.2712	0.3964	1.9015	-0.143794	0.194425	1	1	-0.181056	0.0546875
Cuedc2	26.2517	176.866	5.0988	0	28.6558	1019.33	25.751	0	0.0289	22.8418	0.129	0.0253	27.8572	0.0273	-0.1946	0.2864	-2.2389	0	0	0	1.18e-07	0.6564	1.5299	0.7027	1.3168	-0.0658887	0.161832	1	1	-0.18004	0.142292
Uqcrq	27.5337	239.139	8.3663	0	30.8803	1178.12	37.7589	0	0.0351	24.6675	0.1031	0.0321	30.0821	0.0256	-0.132	0.2863	-2.0121	0	0	0	4.26e-11	0.8603	1.2427	0.9626	1.0328	-0.106275	0.203234	1	1	-0.179994	0.0934579
Mgat2	25.619	701.083	15.3832	0	30.4852	2555.04	51.2923	0	0.0219	24.6947	0.0353	0.02	30.1023	0.0118	-0.1302	0.2857	-1.577	0	0	0	8.77e-06	0.5395	1.6964	0.6023	1.472	-0.104267	0.152446	1	1	-0.179641	0.095
Top1	26.931	608.047	5.6174	9.29e-15	31.758	3122.62	34.8135	2.17e-21	0.0092	25.7818	0.0424	0.0111	31.4218	0.0101	0.2682	0.2854	-2.0678	0	0	0	3.27e-09	0.2386	2.7464	0.3502	2.0533	-0.318675	0.337554	1	1	-0.179493	-0.171171
Chchd1	27.165	184.355	2.7032	3.3e-24	30.2024	646.816	7.0161	1.42e-16	0.0147	23.6587	0.1283	0.0109	28.8331	0.0445	-0.4309	0.2854	-1.5269	0	0	0	6.78e-06	0.3457	2.2071	0.3121	2.1347	0.107658	0.0339158	1	1	-0.17946	0.348624
Lsm4	26.2086	461.036	17.0865	0	30.5559	2299.9	68.7488	0	0.037	24.7629	0.0541	0.0299	30.1401	0.0132	-0.3088	0.2835	-2.0396	0	0	0	1.91e-06	0.9133	1.2096	0.9026	1.1156	0.0118546	0.0842596	1	1	-0.178407	0.237458
Rps13	33.5237	1434.79	81.7969	0	40.348	3379.76	190.469	0	0.0573	32.7388	0.0228	0.0565	39.8384	0.0118	-0.0207	0.2832	-0.9526	4.79e-06	0	0	0	1.8665	0.6766	2.2285	0.501	-0.162441	0.350499	1	1	-0.17821	0.0141593
Snrpc	24.9724	889.545	18.0642	0	30.9337	665.092	10.7572	0	0.0203	24.2837	0.0273	0.0162	29.5383	0.0445	-0.3278	0.2826	0.7017	0	0	0	0.000117	0.4922	1.8049	0.476	1.6872	0.0340336	0.0697606	1	1	-0.177891	0.253086
Cd52	33.362	3450.54	171.839	0	40.5188	4745.27	264.101	0	0.0497	33.0314	0.0096	0.0559	40.1427	0.0084	0.1674	0.2813	-0.1921	0	0	0	0	1.6508	0.796	2.2268	0.5294	-0.258667	0.503589	1	1	-0.177151	-0.110912
Psmc5	28.1168	680.77	10.0101	0	33.319	1971.29	24.5608	1.24e-26	0.0147	26.9764	0.0397	0.0125	32.7458	0.0166	-0.2357	0.2796	-1.258	0	0	0	0.000155	0.3952	2.0173	0.4087	1.8174	-0.0330316	0.109992	1	1	-0.176187	0.176
Gnb2l1	25.6775	654.704	27.5825	0	31.2942	708.012	30.993	0	0.042	24.6836	0.0379	0.0437	29.9446	0.0425	0.0569	0.2787	0.1623	0	0	0	3.32e-25	1.0331	1.1364	1.3047	0.8689	-0.20817	0.307861	1	1	-0.175691	-0.0389016
Scamp3	26.8787	318.286	2.9934	1.79e-18	30.4563	1679.82	11.3582	5.75e-11	0.0094	24.7551	0.0781	0.0068	29.8832	0.0178	-0.4743	0.2716	-2.1306	0	0	0	1.28e-07	0.2311	2.7797	0.2004	2.7572	0.153194	0.00816045	1	1	-0.171605	0.382353
BC035044	24.8337	1195.22	22.8557	0	30.0469	1286.51	16.43	0	0.0191	24.3135	0.0205	0.0128	29.3441	0.0229	-0.5812	0.2713	0.1591	0	0	0	3.44e-08	0.4638	2.0255	0.374	2.0643	0.240107	-0.0187957	1	1	-0.171435	0.492187
Nhp2	26.7586	226.626	5.397	0	30.6996	484.585	9.2562	0	0.0238	23.8958	0.1054	0.0191	28.8341	0.0596	-0.3202	0.271	-0.824	0	0	0	9.87e-05	0.5629	1.6793	0.5461	1.5761	0.0307636	0.0654781	1	1	-0.171266	0.246073
Gltp	24.6577	843.628	30.4384	0	29.3922	1684.25	36.1437	0	0.036	23.9356	0.0286	0.0214	28.8706	0.0173	-0.7505	0.2704	-0.727	0	0	0	1.06e-26	0.8584	1.2887	0.6165	1.4767	0.392376	-0.127311	1	1	-0.170935	0.682243
Chrac1	25.1945	128.479	3.1301	0	26.6631	480.391	8.3072	0	0.0244	21.0408	0.1644	0.0173	25.2461	0.0526	-0.4949	0.2629	-1.6438	0	0	0	2.79e-07	0.5124	1.8021	0.4352	1.7951	0.17739	0.0038995	1	1	-0.166572	0.410405
Rpl18	35.2387	964.599	61.7446	0	41.46	2505.96	149.856	0	0.0642	33.9761	0.0352	0.0599	40.7604	0.0163	-0.1015	0.2626	-1.1147	0	0	0	1.02e-19	2.1786	0.5716	2.4374	0.4592	-0.106179	0.244774	1	1	-0.166443	0.0717863
Ino80e	27.7037	325.945	3.2764	1.15e-18	31.213	1617.74	14.9002	4.92e-13	0.0101	25.5114	0.0783	0.0092	30.5893	0.019	-0.129	0.2619	-2.0439	0	0	0	6.46e-05	0.2551	2.6156	0.28	2.2669	-0.0889286	0.153822	1	1	-0.166002	0.0978261
Cdk5rap3	27.2549	316.412	3.384	1.24e-19	30.4848	1913.23	19.0028	4.72e-15	0.0107	25.0656	0.0792	0.0099	29.9882	0.0157	-0.1109	0.2587	-2.3333	0	0	0	5.16e-05	0.2667	2.5652	0.2988	2.1897	-0.10743	0.171485	1	1	-0.164151	0.0808081
Srp19	26.7341	534.163	7.46	5.18e-26	30.7628	3082.74	37.6279	2.04e-22	0.014	25.4444	0.0477	0.0122	30.4388	0.0099	-0.1976	0.2586	-2.264	0	0	0	0.000173	0.3538	2.1949	0.3708	1.9864	-0.0458468	0.104964	1	1	-0.16408	0.147541
Psmd8	23.2942	540.31	19.7275	0	27.5018	896.442	28.7466	0	0.0364	22.3024	0.0421	0.032	26.6732	0.0298	-0.1838	0.2582	-0.4971	0	0	0	1.6e-08	0.8109	1.3603	0.8551	1.1666	-0.0516899	0.166038	1	1	-0.163865	0.1375
Hdac2	27.2394	258.042	2.446	3.23e-17	30.1352	1247.35	10.369	2.6e-12	0.0095	24.616	0.0956	0.0083	29.408	0.0236	-0.1895	0.2566	-2.0178	0	0	0	3.46e-05	0.233	2.7061	0.2434	2.4096	-0.042728	0.123049	1	1	-0.162949	0.144578
Ndufs2	27.9921	1136.29	16.8173	0	32.9186	3112.27	46.1514	0	0.0147	27.2865	0.0244	0.0149	32.5575	0.0105	0.0127	0.2548	-1.2211	9.3e-06	0	0	2.7e-07	0.4003	2.0228	0.4844	1.6665	-0.173617	0.213801	1	1	-0.161898	-0.0134228
Arpc3	34.5837	1366.8	80.7146	0	41.0427	2051.12	106.275	0	0.0594	33.708	0.0246	0.0521	40.2011	0.0196	-0.189	0.2541	-0.3328	0	0	0	1.9e-06	1.9852	0.5982	2.0771	0.4858	-0.0442444	0.231371	1	1	-0.161515	0.140115
Cmas	26.9971	689.547	7.6233	1.12e-20	31.5829	1585.05	17.6657	1.53e-25	0.0111	25.9645	0.0376	0.0111	30.9386	0.0196	0.0045	0.2529	-0.9397	1.17e-05	0	0	1.18e-05	0.2862	2.4693	0.3413	2.0512	-0.161442	0.203832	1	1	-0.160773	0
Ube2g2	24.9116	250.821	3.4795	8.21e-21	28.1017	652.217	8.4597	2.99e-24	0.0139	22.6426	0.0903	0.013	26.9226	0.0412	-0.0935	0.2498	-1.1316	0	0	0	5.29e-05	0.3137	2.341	0.3484	2.0155	-0.0995982	0.161498	1	1	-0.158974	0.0692308
Dusp2	25.7774	457.316	8.0921	0	29.5906	1431.91	13.2939	9.64e-19	0.0177	24.3842	0.0537	0.0093	28.9714	0.0203	-0.9327	0.2487	-1.4033	0	0	0	2.53e-19	0.4306	2.0657	0.2684	2.4913	0.604322	-0.170835	1	1	-0.158335	0.903226
Hmgb2	37.9672	3736.72	289.172	0	45.0634	4481.51	280.938	0	0.0776	37.5589	0.01	0.063	44.5838	0.0099	-0.3013	0.2474	-0.016	0	0	1.7e-16	2e-16	2.8984	0.4963	2.7937	0.4592	0.0374772	0.0807927	1	1	-0.157566	0.231746
Bnip3l	27.6816	499.675	20.1401	0	31.7058	1715.43	66.7581	0	0.0403	26.2116	0.0525	0.039	31.11	0.0181	-0.0473	0.2472	-1.5333	3.85e-15	0	0	6.37e-16	1.0525	1.1197	1.2062	0.8942	-0.127425	0.252181	1	1	-0.157454	0.0333333
Pgls	28.8236	1074.47	33.4455	0	34.0659	1439.04	44.2673	0	0.0311	28.0568	0.0261	0.0308	33.2488	0.0231	-0.0145	0.245	-0.178	3.55e-15	0	0	5.26e-13	0.8727	1.2751	1.02	1.0364	-0.144412	0.230316	1	1	-0.156156	0.00974026
Abhd16a	25.8829	491.388	4.1859	1.59e-14	29.9551	1044.16	6.6644	1.64e-09	0.0085	24.5696	0.0502	0.0064	29.1058	0.0279	-0.4147	0.2444	-0.8481	0	0	0	1.09e-07	0.2087	2.9234	0.1854	2.8964	0.125674	0.00932192	1	1	-0.155852	0.328125
Rps29	40.3684	2874.38	153.287	0	47.7258	3964.07	214.938	0	0.0534	39.7895	0.0138	0.0542	47.1232	0.0119	0.0237	0.244	-0.2199	1.15e-09	0	0	0	2.1245	0.5469	2.5492	0.392	-0.166601	0.395153	1	1	-0.155628	-0.0147601
Ndufb2	25.9658	404.259	7.6542	0	29.3708	1564.52	25.9513	0	0.019	24.3765	0.0603	0.0166	28.8159	0.0184	-0.1924	0.2414	-1.7105	0	0	0	0.000137	0.4591	1.8399	0.4779	1.6568	-0.0393388	0.110514	1	1	-0.154061	0.144578
Ninj1	26.9653	1433.83	30.6721	0	31.5702	3171.8	58.2023	0	0.0213	26.4466	0.0185	0.0184	31.2319	0.0099	-0.2163	0.2399	-0.9119	0	0	0	0.000255	0.5617	1.7359	0.5698	1.5825	-0.0142155	0.0969352	1	1	-0.153218	0.157609
Tmed10	26.8174	748.827	34.863	0	31.039	1917.94	70.3797	0	0.0465	25.8734	0.0348	0.0367	30.5185	0.0159	-0.34	0.2382	-1.1281	0	0	0	3.09e-11	1.2025	0.9846	1.113	0.9468	0.0804133	0.039924	1	1	-0.152206	0.26703
Lrrc59	26.741	895.627	7.2762	4.79e-12	31.623	969.199	8.291	4.31e-15	0.0081	25.9455	0.029	0.0086	30.6018	0.0315	0.0833	0.2381	0.1186	2.92e-17	0	0	2.46e-05	0.209	2.826	0.2609	2.3491	-0.198927	0.203014	1	1	-0.152158	-0.0581395
Eny2	27.993	744.041	7.6024	3.22e-20	32.7049	1131.67	10.6366	5.02e-18	0.0102	26.9611	0.0363	0.0094	31.7736	0.0281	-0.1157	0.2369	-0.3692	0	0	0	7.49e-05	0.2747	2.4906	0.2985	2.1768	-0.079732	0.144157	1	1	-0.151462	0.0851064
Ube2k	27.2559	2330.71	51.3518	0	33.5304	581.102	11.8015	0	0.022	26.9239	0.0116	0.0204	31.6754	0.0545	-0.1069	0.2345	2.2258	0	0	0	6.28e-05	0.5914	1.6066	0.6414	1.4237	-0.0779545	0.128468	1	1	-0.150006	0.0784314
Tor1aip1	27.8977	436.503	4.7117	2.59e-22	32.3013	660.183	6.4595	8.01e-19	0.0108	26.1994	0.06	0.0098	30.7803	0.0466	-0.1432	0.2325	-0.3637	0	0	0	7.39e-05	0.2812	2.5261	0.2998	2.2605	-0.0620414	0.117496	1	1	-0.148826	0.102041
Csnk1d	28.38	357.937	3.3426	3.22e-16	31.3065	2264.32	20.2023	1.16e-14	0.0094	26.2779	0.0734	0.0089	30.8637	0.0136	-0.0659	0.2321	-2.4299	9.26e-17	0	0	3.35e-05	0.2442	2.7252	0.2762	2.3057	-0.115858	0.18194	1	1	-0.148582	0.0561798
Calm1	30.1049	1846.31	84.018	0	35.146	3365.12	172.988	0	0.0456	29.6078	0.016	0.0515	34.7519	0.0103	0.1754	0.2311	-0.6341	0	0	0	0	1.3487	0.9193	1.7761	0.6467	-0.24064	0.421525	1	1	-0.148024	-0.114563
Rnf115	26.4356	548.769	11.3634	0	29.8871	2624.41	44.9446	0	0.0207	25.2048	0.046	0.0171	29.5368	0.0113	-0.272	0.2288	-2.0207	0	0	0	0.000172	0.5211	1.7264	0.5088	1.6337	0.0241745	0.0567424	1	1	-0.146664	0.210526
Sfpq	29.9221	1731.5	15.7747	2.48e-17	35.1763	1668.5	21.1935	0	0.0091	29.3908	0.017	0.0127	34.4282	0.0206	0.4829	0.2282	0.2779	0	0	0	1.62e-17	0.2665	2.528	0.4364	1.7665	-0.389322	0.431078	1	1	-0.146316	-0.283465
Polr2m	27.3887	1068.57	9.6995	6.57e-15	31.7676	1864.32	13.5654	1.79e-12	0.0091	26.6896	0.0251	0.0073	31.2124	0.0167	-0.3159	0.2258	-0.5866	0	0	0	4.42e-06	0.2424	2.6773	0.2267	2.5119	0.0692545	0.0658466	1	1	-0.144904	0.246575
Srsf2	26.0777	817.334	33.1633	0	30.4487	936.316	37.2613	0	0.0406	25.256	0.031	0.0398	29.4775	0.0315	-0.027	0.223	0.0235	6.15e-12	0	0.00103	2.11e-10	1.0241	1.1082	1.1728	0.92	-0.126791	0.204565	1	1	-0.143211	0.0201005
Phf5a	29.8839	1076.07	14.0473	0	34.2966	3247.9	35.1637	8.23e-24	0.0131	29.0711	0.027	0.0108	33.9191	0.0104	-0.2706	0.2225	-1.3699	0	0	0	6.98e-05	0.3794	2.1172	0.3679	1.9632	0.0312585	0.0784434	1	1	-0.142928	0.212963
Shfm1	43.8009	3437.87	172.343	0	50.8299	6511.54	323.72	0	0.0503	43.2183	0.0126	0.0498	50.4004	0.0077	-0.0141	0.2218	-0.7005	0.00434	0	0	0	2.1602	0.5236	2.5054	0.3582	-0.137782	0.461753	1	1	-0.142501	0.0100402
Zfp36l2	27.4499	745.599	24.4251	0	32.1496	773.091	15.2117	0	0.0327	26.4544	0.0356	0.0197	30.8444	0.0399	-0.7312	0.2215	0.1638	0	0	0	0	0.8662	1.3023	0.6044	1.4733	0.433157	-0.116066	1	1	-0.142327	0.659898
Ppp1r11	27.8187	747.924	7.1276	7.7e-17	31.9396	1356.08	12.7853	2.01e-16	0.0096	26.8018	0.0358	0.0094	31.1822	0.023	-0.0185	0.2184	-0.6401	0.0371	0	0	4.31e-05	0.2551	2.6507	0.2939	2.2395	-0.132018	0.183612	1	1	-0.140478	0.0212766
Cmc2	25.859	355.281	3.5152	1.97e-16	29.0398	821.187	7.6019	4.58e-13	0.0099	24.0958	0.0681	0.0093	28.0318	0.0342	-0.0962	0.2183	-0.9962	0	0	0	4.78e-05	0.2375	2.7255	0.2592	2.3916	-0.0837191	0.139614	1	1	-0.140412	0.0645161
Actr3	32.8411	1299.69	75.0509	0	38.345	1291.3	72.8796	0	0.0578	32.0144	0.0246	0.0567	37.2163	0.0288	-0.0269	0.2172	0.2275	1.46e-10	0	0	1.31e-17	1.8473	0.6393	2.1034	0.4651	-0.121755	0.374543	1	1	-0.139775	0.0194004
Mrpl17	26.6171	234.142	4.0424	0	28.286	1466.56	24.2355	0	0.0173	23.8746	0.103	0.0165	27.7362	0.019	-0.065	0.2163	-2.4421	0	0	0	6.43e-06	0.412	2.0252	0.4578	1.7168	-0.100044	0.179637	1	1	-0.139226	0.0484848
Smc4	26.621	695.582	10.3474	0	30.156	2351.05	42.057	0	0.0149	25.6267	0.0369	0.0179	29.7568	0.0127	0.2658	0.2156	-1.5417	0	0	0	5.1e-14	0.3814	2.1374	0.5331	1.6116	-0.284562	0.32626	1	1	-0.138795	-0.167598
Rps15	33.3664	1243.52	69.1237	0	38.1664	2625.45	147.307	0	0.0558	32.4697	0.0261	0.0561	37.5909	0.0143	0.0074	0.2113	-0.8631	8.11e-07	0	0	1.22e-25	1.7952	0.6961	2.0999	0.5349	-0.145102	0.301365	1	1	-0.136235	-0.00534759
Kxd1	28.6656	470.852	6.0429	0	31.8967	1622.71	17.6719	1.87e-22	0.0128	27.003	0.0574	0.0109	31.2617	0.0193	-0.2388	0.2113	-1.5706	0	0	0	6.87e-05	0.3454	2.2533	0.3395	2.1054	0.0173785	0.0702479	1	1	-0.136227	0.174312
Tmem160	24.8202	465.756	11.9229	0	28.1221	916.253	23.7524	0	0.0256	23.5586	0.0506	0.0259	27.2651	0.0298	0.0176	0.2108	-0.7637	3.87e-16	0	0	7.25e-11	0.6022	1.6298	0.7042	1.3291	-0.144845	0.226243	1	1	-0.135943	-0.011583
Fkbp2	27.279	717.254	12.5529	0	30.6927	3313.83	55.8385	0	0.0176	26.2646	0.0367	0.0169	30.3897	0.0092	-0.0635	0.2105	-1.9976	7.79e-14	0	0	3.8e-05	0.4601	1.8597	0.5137	1.6171	-0.104341	0.150022	1	1	-0.13574	0.0414201
Rps11	41.6408	2646.78	167.448	0	47.9698	3699.6	215.616	0	0.0635	40.9778	0.0155	0.0583	47.3256	0.0128	-0.1233	0.2078	-0.2735	0	0	0	4.72e-08	2.5962	0.4591	2.7536	0.3898	-0.0571615	0.177783	1	1	-0.13413	0.0891938
Clic1	34.7894	3005.08	198.656	0	40.3643	2466.44	144.955	0	0.0662	34.3792	0.0114	0.0589	39.695	0.0161	-0.1675	0.2074	0.4922	0	0	0	6.24e-05	2.277	0.5098	2.3403	0.421	-0.0270478	0.210926	1	1	-0.133916	0.123939
Rpa2	26.0914	387.738	4.635	4.04e-21	28.649	1981.54	14.3307	1.05e-11	0.012	24.4408	0.0631	0.0073	28.216	0.0142	-0.7231	0.2072	-2.1505	0	0	0	4.29e-12	0.2918	2.4594	0.2033	2.713	0.435317	-0.0934759	1	1	-0.133796	0.643836
Rps9	49.5521	4053	263.528	0	56.9793	5390.22	326.109	0	0.0655	48.9108	0.012	0.061	56.3418	0.0104	-0.1026	0.2041	-0.2064	3.23e-19	0	0	0	3.1707	0.3	3.4079	0.2184	-0.069603	0.373626	1	1	-0.131891	0.0737705
H2afv	23.9194	1169.37	60.4076	0	27.728	1005.32	34.9461	0	0.0517	23.4278	0.0201	0.0347	26.9567	0.0269	-0.5737	0.2024	0.4233	0	0	0	0	1.2092	1.0513	0.9313	1.1785	0.2984	-0.107934	1	1	-0.13091	0.489914
Trappc6a	27.8944	840.794	18.8693	0	31.323	3516.8	74.2967	0	0.0224	26.9778	0.0322	0.0211	31.0379	0.0089	-0.0886	0.2023	-1.8564	0	0	0	9.79e-07	0.6024	1.6444	0.6579	1.4107	-0.0843593	0.165662	1	1	-0.130811	0.0616114
Vapb	28.9724	883.381	4.9296	4.61e-08	33.5117	872.8	6.786	7.36e-14	0.0056	28.0318	0.0319	0.0078	32.2496	0.0369	0.4848	0.2022	0.21	0	0	0	1.14e-07	0.1559	3.5147	0.2487	2.4813	-0.37314	0.416475	1	1	-0.130786	-0.282051
Eif3i	25.8386	363.878	8.6125	0	28.6243	805.666	22.196	0	0.0236	24.0944	0.0665	0.0276	27.6264	0.0343	0.2228	0.1973	-0.9549	0	0	0	1.72e-19	0.5668	1.6538	0.7598	1.2666	-0.254014	0.3057	1	1	-0.127849	-0.144928
Tceb1	24.7085	422.193	7.9319	0	27.1926	1752.45	27.9954	1.3e-24	0.0188	23.3374	0.0554	0.016	26.7568	0.0153	-0.2318	0.1973	-1.8589	0	0	0	8.81e-05	0.4389	1.911	0.425	1.8052	0.0327059	0.0586085	1	1	-0.127796	0.175
Necap2	26.5206	1419.94	18.2547	0	30.0394	4774.42	49.8816	2.16e-19	0.0128	26.0195	0.0184	0.0104	29.8314	0.0063	-0.3007	0.1972	-1.5501	0	0	0	1.12e-05	0.3344	2.2946	0.312	2.2104	0.0717949	0.0380927	1	1	-0.127781	0.230769
Capns1	30.055	737.185	35.7498	0	35.4883	495.321	22.1621	0	0.0486	28.8675	0.0392	0.0448	33.0807	0.0668	-0.1165	0.1965	0.7707	0	0	0	4.14e-08	1.4001	0.8591	1.469	0.7327	-0.0469027	0.172513	1	1	-0.127361	0.0848214
Smek2	26.6266	797.474	8.063	1.68e-18	30.3016	1143.48	16.067	8.77e-25	0.0101	25.7538	0.0323	0.014	29.4941	0.0259	0.4706	0.1956	-0.3183	0	0	0	8.92e-16	0.2597	2.6276	0.4124	1.8367	-0.370272	0.430609	1	1	-0.126815	-0.278571
Rps7	38.9825	2852.44	198.726	0	45.334	1540.21	100.665	0	0.07	38.4276	0.0135	0.0656	44.0013	0.0285	-0.0948	0.1954	1.0848	4.2e-24	0	0	3.51e-16	2.6757	0.4308	2.8696	0.3641	-0.0675704	0.183191	1	1	-0.126671	0.0670732
Eapp	25.3729	608.596	7.72	4.82e-22	29.1356	645.055	8.1928	7.55e-23	0.0127	24.343	0.04	0.0127	27.8554	0.0432	0.0028	0.1945	0.11	4.01e-09	0	0	3.47e-05	0.3081	2.395	0.3526	2.0438	-0.126205	0.171837	1	1	-0.126094	0
Mrps34	25.9741	567.737	7.6101	1.69e-23	29.1327	1122.9	13.031	4.22e-25	0.0134	24.8208	0.0437	0.0116	28.3768	0.0253	-0.2107	0.1932	-0.7874	0	0	0	6.97e-05	0.3311	2.2939	0.3284	2.0985	0.00822168	0.0931141	1	1	-0.125314	0.155172
Acbd6	27.0566	1153.04	9.2041	3.67e-19	30.6863	2048.4	15.0597	1.37e-12	0.008	26.4252	0.023	0.0074	30.2085	0.0148	-0.1178	0.193	-0.6402	0	0	0	1.88e-05	0.2109	2.9478	0.2202	2.6029	-0.0422343	0.132506	1	1	-0.12524	0.0810811
Mrpl4	25.6858	443.062	3.7632	7.4e-12	28.6256	840.429	6.532	1.6e-10	0.0085	24.2452	0.055	0.0078	27.6843	0.033	-0.1254	0.1914	-0.7374	0	0	0	1.3e-05	0.2044	3.0308	0.2147	2.6891	-0.0479739	0.127069	1	1	-0.124226	0.0897436
Ssna1	26.419	823.632	25.9635	0	30.5994	628.679	17.8014	0	0.0316	25.5784	0.031	0.0283	29.1683	0.0464	-0.1549	0.1895	0.5797	0	0	0	4.14e-06	0.8002	1.3344	0.8254	1.1844	-0.0305307	0.126646	1	1	-0.123075	0.116608
Cd47	40.7135	4524.01	250.757	0	46.4268	5013.12	226.003	0	0.0554	40.3304	0.0089	0.0451	45.9589	0.0092	-0.2989	0.1885	0.0415	0	0	4.12e-14	0	2.2429	0.5097	2.056	0.504	0.0909047	0.0113095	1	1	-0.122468	0.228381
Gsdmd	25.2062	729.03	5.8055	1.5e-12	28.1381	1959.02	19.3641	1.89e-24	0.008	24.3456	0.0335	0.0099	27.7159	0.0141	0.3149	0.1871	-1.242	0	0	0	1.98e-06	0.1932	3.0834	0.2734	2.369	-0.293343	0.301562	1	1	-0.121602	-0.191919
Mrps21	26.7001	816.093	13.9134	0	30.2983	1022.36	19.2292	0	0.017	25.8421	0.0318	0.0188	29.4014	0.0287	0.1454	0.1862	-0.1456	0	0	0	1.8e-09	0.4395	1.9198	0.5485	1.5483	-0.198724	0.239941	1	1	-0.121059	-0.0957447
Rpl36al	27.544	657.491	27.2587	0	30.608	1559.89	72.2557	0	0.0415	26.414	0.0402	0.0463	30.0062	0.0193	0.1588	0.184	-1.0582	0	0	0	0	1.0916	1.0774	1.3894	0.8178	-0.214337	0.317437	1	1	-0.119715	-0.103672
Cnbp	31.1975	537.52	32.5687	0	33.9361	2246.68	100.238	0	0.0607	29.4596	0.0548	0.0445	33.4093	0.0149	-0.448	0.1815	-1.8739	0	0	0	0	1.7741	0.6942	1.4856	0.7451	0.194198	-0.068313	1	1	-0.118222	0.364045
Wsb1	24.8947	904.625	16.1541	0	28.5504	665.257	12.0012	0	0.0178	24.2116	0.027	0.018	27.3652	0.0412	0.0166	0.1766	0.6121	0.000216	0	0	2.9e-06	0.431	1.9396	0.4937	1.6455	-0.127	0.17873	1	1	-0.115241	-0.0111111
Anp32e	24.9841	842.952	29.8059	0	27.9957	1314.5	42.0056	0	0.0354	24.2535	0.0288	0.0321	27.3906	0.0208	-0.1386	0.1755	-0.471	0	0	0	0.00117	0.8589	1.2705	0.8719	1.1797	-0.01491	0.0769687	1	1	-0.114532	0.102804
Nosip	25.9823	1466.95	12.1083	3.26e-13	29.1229	2899.96	24.7933	6.19e-13	0.0083	25.5234	0.0175	0.0085	28.8197	0.01	0.0486	0.1752	-0.8104	5.28e-16	0	0	3.46e-05	0.211	2.9143	0.2471	2.4678	-0.146095	0.18093	1	1	-0.114377	-0.0235294
Uqcrfs1	26.291	367.584	12.4615	0	28.178	1555.77	48.457	0	0.034	24.5113	0.0666	0.0311	27.6594	0.018	-0.1282	0.1743	-1.8858	0	0	0	4.38e-07	0.8269	1.319	0.8608	1.161	-0.039382	0.13609	1	1	-0.113817	0.0932476
Pkm	40.4562	1511.77	93.7933	0	45.2983	2368.66	140.218	0	0.0622	39.3852	0.026	0.0593	44.4295	0.0188	-0.0694	0.1739	-0.4736	0	0	0	3.19e-10	2.449	0.4508	2.6351	0.3546	-0.0706235	0.271292	1	1	-0.113535	0.0489039
Strap	27.4051	1185.07	19.2334	0	31.0638	1083.23	15.7706	0	0.0162	26.7724	0.0226	0.0146	30.1775	0.0279	-0.1568	0.1727	0.3038	0	0	0	0.000184	0.4342	1.9114	0.4386	1.7408	-0.0100319	0.0980009	1	1	-0.112836	0.109589
Xrn2	28.2517	396.225	3.1759	2.63e-15	30.836	811.776	8.5374	3.95e-19	0.008	26.3622	0.0666	0.0105	29.6831	0.0365	0.3904	0.1712	-0.8657	0	0	0	4.25e-08	0.211	2.9261	0.311	2.1722	-0.321543	0.347067	1	1	-0.111878	-0.238095
Psmd14	26.4054	379.204	8.3767	0	28.8752	727.055	15.9411	0	0.0221	24.6793	0.0654	0.0219	27.7576	0.0382	-0.0106	0.1696	-0.7757	8.62e-18	0	0	3.38e-06	0.5447	1.682	0.607	1.4459	-0.102636	0.163289	1	1	-0.110899	0.00913242
Cox5a	27.7415	836.234	35.3102	0	30.8873	1250.82	43.7552	0	0.0423	26.8314	0.0321	0.035	30.1344	0.0241	-0.2719	0.1675	-0.4129	0	0	0	2.67e-09	1.1306	1.0361	1.0553	1.0056	0.0713541	0.0303302	1	1	-0.109609	0.208571
Cks2	28.0428	565.409	27.5553	0	30.3519	2464.74	91.8238	0	0.0488	26.683	0.0473	0.0373	29.9654	0.0122	-0.3872	0.1674	-1.9585	0	0	0	5.88e-14	1.2896	1.0063	1.1157	1.0473	0.155866	-0.0391483	1	1	-0.10954	0.308311
Pdcd5	27.5876	627.264	10.4842	0	30.2686	1439.1	20.7719	1.99e-27	0.0167	26.3953	0.0422	0.0144	29.6355	0.0206	-0.2115	0.167	-1.0312	0	0	0	7.98e-05	0.4374	1.9544	0.4283	1.7964	0.0212468	0.0879537	1	1	-0.109335	0.159722
Cdkn2aipnl	28.1799	468.324	3.682	7.9e-10	30.454	1497.77	9.693	2.74e-11	0.0079	26.5711	0.0567	0.0065	29.8291	0.0199	-0.2808	0.1669	-1.5095	0	0	0	4.25e-07	0.2081	2.9141	0.1931	2.8208	0.07768	0.0330757	1	1	-0.109222	0.215385
Ubxn1	26.3774	2072.87	31.4683	0	29.9064	1323.36	19.6784	0	0.0152	26.0399	0.0126	0.0149	29.2274	0.0221	-0.0282	0.1666	0.8083	2.38e-18	0	0	8.23e-05	0.3961	2.0738	0.4343	1.8141	-0.0879576	0.143156	1	1	-0.109059	0.0201342
Psme2	24.9875	770.113	23.9972	0	28.0235	877	22.9037	0	0.0311	24.1914	0.0316	0.0262	27.1381	0.0309	-0.251	0.1658	-0.029	0	0	0.000172	1.08e-05	0.7515	1.4256	0.7066	1.3347	0.0635437	0.0681052	1	1	-0.108582	0.187023
Ube2f	25.8681	962.798	11.1793	2.39e-25	29.3393	761.486	7.6648	1.01e-21	0.0116	25.1744	0.0262	0.0101	28.2306	0.0371	-0.2056	0.1653	0.5015	0	0	0	2.18e-05	0.2915	2.4912	0.2831	2.3107	0.0296715	0.0781149	1	1	-0.108258	0.148515
Dtymk	26.4592	531.398	16.3777	0	28.6845	1864.55	55.8192	0	0.0308	25.1764	0.0475	0.0299	28.2312	0.0152	-0.0413	0.1652	-1.6461	5.31e-09	0	0	3.68e-05	0.7714	1.3988	0.8415	1.2306	-0.0833036	0.136681	1	1	-0.108207	0.0301003
BC028528	28.2927	740.587	10.471	0	31.1356	1535.13	23.1105	0	0.0142	27.2309	0.0367	0.015	30.4999	0.02	0.0802	0.1636	-0.8756	0	0	0	7.03e-06	0.3842	2.1455	0.457	1.8003	-0.1593	0.191746	1	1	-0.107181	-0.0533333
Ccdc12	25.4787	402.393	14.6589	0	27.8276	732.332	27.1114	0	0.0364	23.9283	0.0597	0.0371	26.798	0.0366	0.0277	0.1634	-0.705	4.52e-15	0	0	5.63e-12	0.8648	1.2771	0.9928	1.0505	-0.128928	0.215707	1	1	-0.107086	-0.0188679
Trmt10c	26.8866	1622.85	11.764	2.04e-13	31.2432	551.362	3.4462	5.49e-08	0.0072	26.4269	0.0164	0.0063	29.5508	0.0536	-0.2088	0.1612	1.7115	0	0	0	2.54e-06	0.1906	3.1091	0.184	2.8679	0.0358696	0.0841034	1	1	-0.105713	0.142857
Txnl4a	27.5873	342.285	2.7058	1.03e-16	29.8373	658.281	4.9421	8.06e-11	0.0079	25.5086	0.0747	0.0075	28.5208	0.0434	-0.0767	0.161	-0.7819	0	0	0	1.52e-05	0.2013	3.0164	0.2132	2.6783	-0.0558161	0.126237	1	1	-0.105614	0.0533333
Erp29	25.8646	490.28	11.2365	0	28.5012	761.037	18.2601	0	0.0229	24.5503	0.0502	0.024	27.4442	0.0362	0.0626	0.1608	-0.4731	4.82e-17	0	0	1.5e-07	0.5608	1.7059	0.6534	1.4337	-0.14172	0.189858	1	1	-0.105447	-0.0458333
Atg3	27.9607	1197.88	23.6729	0	31.524	949.295	18.3872	0	0.0197	27.3082	0.0229	0.0194	30.4977	0.0321	-0.025	0.1594	0.4863	2.04e-07	0	0	1.82e-06	0.5383	1.7429	0.5899	1.4937	-0.0874725	0.166834	1	1	-0.104582	0.0154639
Pes1	29.5744	826.547	5.4101	6.33e-11	32.7659	1188.39	8.3288	1.85e-14	0.0065	28.5333	0.0346	0.007	31.8653	0.0268	0.1	0.1593	-0.3651	0	0	0	2.39e-05	0.1864	3.0675	0.2226	2.5435	-0.162624	0.206015	1	1	-0.104565	-0.0714286
Max	29.5206	1570.6	23.9876	0	32.5834	4050.56	50.4704	7.86e-27	0.0153	28.9627	0.0185	0.0124	32.3093	0.008	-0.2965	0.1578	-1.2043	0	0	0	8.91e-06	0.4426	1.941	0.4024	1.9	0.0999006	0.0215789	1	1	-0.10358	0.233871
Rbm7	25.7507	296.701	6.084	0	27.2429	855.781	16.3667	0	0.0205	23.6597	0.0802	0.0191	26.3852	0.0309	-0.0964	0.1573	-1.378	0	0	0	0.000197	0.4828	1.8215	0.5033	1.6234	-0.0407312	0.122028	1	1	-0.103297	0.0732984
Snapin	28.7364	569.746	5.6309	1.72e-24	31.1724	1387.42	13.5246	2.71e-22	0.0099	27.341	0.048	0.0098	30.4726	0.022	-0.0201	0.1564	-1.1271	2.93e-05	0	0	7.59e-05	0.2696	2.5731	0.2971	2.2789	-0.0925614	0.129097	1	1	-0.102768	0.0102041
Yeats4	26.4267	1323.4	13.911	4.23e-22	29.4142	1631.02	18.2895	8.14e-19	0.0105	25.8982	0.0196	0.0112	28.8636	0.0178	0.0883	0.1564	-0.1357	8.56e-23	0	7.34e-24	2.31e-05	0.2722	2.5437	0.3196	2.1288	-0.14831	0.194899	1	1	-0.102738	-0.0625
Zfand2b	25.747	278.094	3.346	1.54e-18	26.6246	1837.76	24.4999	1.06e-22	0.012	23.5488	0.0851	0.0133	26.2306	0.0143	0.1463	0.1556	-2.5722	0	0	0	6.38e-06	0.2824	2.5362	0.3504	2.0787	-0.194064	0.220089	1	1	-0.102239	-0.0977444
Rpl7a	28.8064	1371.22	69.3032	0	32.003	1662.05	88.9767	0	0.0505	28.1884	0.0206	0.0536	31.3881	0.0189	0.0855	0.1551	-0.1252	0	0	0	4.6e-21	1.4111	0.8725	1.6818	0.6753	-0.160958	0.292018	1	1	-0.10194	-0.0578358
Dad1	26.9317	432.722	18.3658	0	29.9518	486.902	18.3423	0	0.0425	25.3351	0.0585	0.0377	28.2006	0.0579	-0.1723	0.1546	-0.0154	0	0	8.8e-06	7.01e-07	1.0706	1.0959	1.0597	0.9928	0.0102859	0.103848	1	1	-0.101611	0.127321
Atp6v1e1	26.8077	835.125	25.5674	0	29.6401	1153.76	37.6974	0	0.0307	25.9558	0.0311	0.0328	28.8736	0.025	0.098	0.1537	-0.3136	4.71e-19	0	0	1.11e-15	0.7913	1.3606	0.9406	1.0828	-0.158728	0.256557	1	1	-0.101054	-0.0640244
H2-Ke6	25.5144	1243.61	21.8893	0	29.05	644.997	8.5642	3.1e-27	0.0176	24.9862	0.0202	0.0133	27.7744	0.043	-0.4004	0.1526	1.0923	0	0	0	4.75e-08	0.439	1.9434	0.3672	1.9911	0.195534	-0.0239566	1	1	-0.100387	0.323308
Hnrnpul2	28.2188	1148.34	16.0815	0	31.1124	1767.56	28.4652	0	0.014	27.5289	0.0241	0.0161	30.5554	0.0174	0.1994	0.1505	-0.472	0	0	0	7.78e-10	0.3857	2.102	0.4903	1.6655	-0.213339	0.262083	1	1	-0.0990496	-0.130435
Fkbp8	27.3868	614.65	11.5979	0	30.3945	681.636	13.206	0	0.0189	26.2042	0.0427	0.0194	29.0785	0.0427	0.0404	0.1502	-0.0008	4.5e-12	0	5.42e-06	1.65e-07	0.4932	1.8092	0.5613	1.5093	-0.121325	0.198701	1	1	-0.0988462	-0.0257732
Idh1	27.1996	1470.21	8.4322	2.3e-13	29.9929	2353.95	25.9027	6.7e-20	0.0057	26.6922	0.0182	0.011	29.613	0.0126	0.9393	0.1498	-0.5291	0	0	0	4.77e-16	0.1531	3.477	0.3271	2.1557	-0.531947	0.612933	1	1	-0.0986324	-0.481818
Arf1	31.3168	1574.78	69.004	0	34.4723	2526.76	99.8766	0	0.0439	30.681	0.0195	0.0395	33.9865	0.0135	-0.1522	0.1476	-0.5319	0	0	0	4.55e-10	1.3389	0.8812	1.3398	0.7835	-0.000671742	0.124697	1	1	-0.0972592	0.111392
Acly	27.5273	840.916	7.393	5.69e-14	30.2839	1147.57	6.6802	5.94e-12	0.0088	26.6411	0.0317	0.0058	29.4848	0.0257	-0.5923	0.1463	-0.3058	0	0	0	3.78e-11	0.2348	2.7058	0.1713	2.9587	0.370695	-0.0854767	1	1	-0.0964463	0.517241
Ywhae	29.4646	628.244	21.7644	0	31.6472	1891.01	67.9757	0	0.0346	28.1156	0.0449	0.0359	31.1053	0.0165	0.052	0.1458	-1.4433	4.54e-16	0	0	1.15e-12	0.9694	1.1484	1.1145	0.9314	-0.130193	0.232983	1	1	-0.0961155	-0.0362117
Rab1b	26.6425	970.648	8.6329	5.2e-21	29.7005	845.98	8.2298	5.13e-18	0.0089	25.9218	0.0267	0.0098	28.6754	0.0338	0.1353	0.1456	0.3395	0	0	0	4.81e-05	0.2299	2.7326	0.2784	2.3289	-0.17421	0.173344	1	1	-0.0960266	-0.0918367
Stk24	28.241	488.856	10.7583	0	30.4721	889.978	17.9309	0	0.022	26.6751	0.0546	0.0201	29.4461	0.0332	-0.1298	0.1426	-0.7188	0	0	0	9.24e-05	0.5846	1.6271	0.592	1.4724	-0.0125	0.105067	1	1	-0.0941041	0.0945274
Psmd11	29.1912	281.323	3.0622	1.79e-21	30.3964	725.93	8.6792	3.49e-22	0.0109	26.4189	0.094	0.012	29.159	0.0402	0.1367	0.1424	-1.2257	0	0	0	2.98e-06	0.2859	2.487	0.349	2.0218	-0.180802	0.230092	1	1	-0.093971	-0.0916667
Mrps18a	27.6247	965.655	11.9644	1.58e-26	30.2518	1380.98	16.3703	1.61e-21	0.0124	26.8332	0.028	0.0119	29.5778	0.0214	-0.0587	0.1405	-0.3829	2.19e-10	0	0	0.000118	0.3307	2.2785	0.3477	2.0115	-0.0488927	0.132737	1	1	-0.0927926	0.0420168
Aco2	28.2375	706.649	5.0413	3.19e-10	30.678	1162.31	7.9042	2.81e-08	0.0071	27.1279	0.0384	0.0068	29.8709	0.0257	-0.0668	0.139	-0.5793	5.47e-10	0	0	1.42e-05	0.1925	2.9865	0.203	2.6438	-0.0517241	0.129624	1	1	-0.0918285	0.0441176
Fam173a	28.6892	930.715	14.8649	0	31.3653	1325.34	20.1245	0	0.016	27.8072	0.0299	0.0152	30.6145	0.0231	-0.0755	0.1388	-0.3692	2.82e-14	0	0	0.000123	0.4409	1.9328	0.4624	1.7202	-0.0464965	0.12359	1	1	-0.0916984	0.0526316
Lsm3	26.1433	667.306	14.9632	0	28.5091	940.615	18.4229	0	0.0224	25.1366	0.0379	0.0195	27.6515	0.0296	-0.1949	0.1376	-0.355	0	0	0	0.000184	0.5614	1.6502	0.5403	1.5708	0.0390524	0.0505475	1	1	-0.0909499	0.148718
Aup1	27.6102	442.012	3.4129	9.37e-15	29.004	1873.81	16.3192	1.86e-15	0.0077	25.9578	0.0591	0.0087	28.5506	0.0153	0.1746	0.1373	-1.9473	0	0	0	2.6e-05	0.1993	3.0185	0.248	2.5125	-0.196371	0.201393	1	1	-0.0908142	-0.114943
Nsmce1	28.3579	1077.22	18.1048	0	31.4891	880.969	12.3672	0	0.0168	27.6242	0.0257	0.0141	30.3831	0.0345	-0.2586	0.1373	0.4215	0	0	0	2.2e-05	0.4654	1.8833	0.4257	1.7933	0.0932582	0.0501868	1	1	-0.0908038	0.191489
Rpl23a	41.628	1401.35	89.0265	0	45.5721	1836.82	114.825	0	0.0637	40.4058	0.0288	0.063	44.4389	0.0241	-0.0171	0.1373	-0.2552	5.23e-13	0	0	2.38e-14	2.5673	0.4417	2.7756	0.3429	-0.0750468	0.288131	1	1	-0.0907561	0.0111111
H3f3a	47.5601	2133.61	145.402	0	51.9375	3367.87	219.478	0	0.0686	46.4888	0.0217	0.0655	51.1225	0.0152	-0.0679	0.1371	-0.52	4.37e-12	0	0	7.16e-16	3.161	0.2761	3.3305	0.1985	-0.0508933	0.390932	1	1	-0.0906392	0.0473282
Sh3bgrl3	50.4345	3595.79	228.894	0	55.2345	5417.5	336.496	0	0.064	49.7001	0.0138	0.0627	54.6161	0.01	-0.0283	0.1361	-0.459	5.6e-16	0	0	7.64e-17	3.1531	0.2789	3.3469	0.1937	-0.0579043	0.439855	1	1	-0.0900101	0.0207337
Scand1	26.0486	288.936	11.4514	0	28.3795	341.169	14.0922	0	0.0399	23.8733	0.0825	0.0414	26.1877	0.0767	0.0533	0.1335	-0.1048	3.29e-08	0	0	1.46e-13	0.9434	1.2108	1.0793	0.984	-0.125915	0.230488	1	1	-0.0883774	-0.0362319
Rpl8	39.025	2358.24	146.556	0	42.9509	2042.47	131.617	0	0.0624	38.377	0.0163	0.0647	42.0411	0.0206	0.0539	0.1316	0.3385	2.23e-14	0	0	0	2.3862	0.5134	2.7052	0.3971	-0.117921	0.292873	1	1	-0.0871552	-0.0355487
Kdelr2	25.9971	1437.71	16.2134	5.46e-25	28.6363	1186	13.1542	5.63e-19	0.0112	25.5162	0.0179	0.0111	27.9468	0.0236	-0.02	0.1313	0.3987	0.0058	0	0	6.09e-05	0.2858	2.4764	0.3087	2.1483	-0.0741821	0.152725	1	1	-0.0869724	0.00900901
Myl6	40.0476	1040.15	65.8625	0	42.6129	4328.53	258.086	0	0.0637	38.5327	0.037	0.0597	42.1767	0.0097	-0.0941	0.1304	-1.925	1.2e-18	0	0	0.00103	2.4345	0.4487	2.5181	0.3669	-0.0331996	0.222949	1	1	-0.0863984	0.0670017
Matr3	28.3095	288.823	3.9899	0	28.8381	1205.09	16.0652	1.66e-24	0.0138	25.757	0.0893	0.0133	28.1606	0.0234	-0.0513	0.1287	-1.9334	2.27e-24	0	0	0.000115	0.3547	2.1673	0.376	1.9183	-0.0566489	0.129802	1	1	-0.0853533	0.037594
Commd7	27.2248	378.203	7.0322	0	28.691	855.622	16.6335	0	0.0187	25.3757	0.067	0.0194	27.743	0.0325	0.0578	0.1287	-1.0452	7.45e-15	0	0	1.32e-06	0.47	1.859	0.5368	1.5697	-0.124441	0.184303	1	1	-0.0853296	-0.0360825
BC029214	28.4441	500.873	4.4803	6.02e-16	29.6078	3595.77	32.8813	1.63e-12	0.0089	26.8765	0.0539	0.0091	29.3539	0.0082	0.0347	0.1272	-2.7213	5.42e-14	0	0	3.93e-05	0.2381	2.7809	0.2692	2.3623	-0.115527	0.1772	1	1	-0.0843976	-0.021978
Sar1a	28.2853	578.126	5.676	1.79e-17	29.6696	3831.89	32.4454	1.24e-11	0.0098	26.9562	0.0466	0.0085	29.4336	0.0077	-0.2168	0.1268	-2.593	0	0	0	1.09e-05	0.2647	2.5779	0.2512	2.4079	0.053742	0.0706009	1	1	-0.0841691	0.152941
Fbl	26.3644	394.964	9.069	0	27.3392	2030.37	41.9693	0	0.023	24.7041	0.0626	0.0206	26.9601	0.0134	-0.1585	0.1261	-2.2262	0	0	0	0.000215	0.5665	1.7104	0.5561	1.5704	0.0187017	0.0891493	1	1	-0.0836792	0.116505
Serinc3	27.9529	799.522	40.2038	0	30.8667	651.982	16.7238	0	0.0504	26.9947	0.0337	0.0256	29.4497	0.0452	-0.9747	0.1256	0.4227	0	0	0	0	1.3546	0.9126	0.7529	1.2898	0.799177	-0.292448	1	1	-0.0833625	0.96875
Srsf1	27.0284	1949.87	17.415	7.21e-17	29.5574	1680.04	17.3684	2.83e-20	0.0089	26.6443	0.0137	0.0103	29.028	0.0173	0.2123	0.1236	0.3337	0	0	0	1.35e-05	0.2386	2.6599	0.2998	2.1788	-0.204136	0.22081	1	1	-0.0821173	-0.135922
Cops3	26.3772	813.028	8.0639	5.42e-17	28.8981	747.739	6.5053	7.71e-12	0.0099	25.5303	0.0315	0.0087	27.7967	0.0372	-0.1882	0.1227	0.2403	0	0	0	5.69e-06	0.2523	2.5833	0.2396	2.4471	0.053005	0.0556577	1	1	-0.0815349	0.137931
Rps14	45.6859	1707.01	118.463	0	49.812	1768.89	120.029	0	0.0696	44.4741	0.0261	0.0683	48.4156	0.0273	-0.0258	0.1225	0.0682	3.6e-18	0	0	3.49e-17	3.0893	0.3236	3.2766	0.2641	-0.0571629	0.225293	1	1	-0.0814097	0.0190337
Arhgdia	25.3968	426.698	12.6507	0	27.0083	746.129	25.1051	0	0.0296	23.9615	0.0564	0.0336	26.0418	0.0351	0.1787	0.1201	-0.6846	0	0	0	1.16e-16	0.7101	1.4349	0.8699	1.1339	-0.183699	0.265456	1	1	-0.0798831	-0.119048
Rplp1	32.5829	944.331	50.9899	0	35.2492	1134.68	66.7926	0	0.0542	31.4661	0.0333	0.0589	34.1673	0.0301	0.1207	0.1188	-0.1441	0	0	0	1.49e-26	1.6897	0.7588	2.0074	0.5981	-0.158264	0.268684	1	1	-0.079058	-0.0797963
Ssbp1	27.2146	769.857	9.1891	1.67e-26	28.831	2691.93	32.6469	1.05e-20	0.0119	26.2586	0.0342	0.0122	28.5073	0.0106	0.0279	0.1185	-1.6926	3.79e-05	0	0	3.42e-05	0.3111	2.3722	0.3457	2.0105	-0.100087	0.179905	1	1	-0.0788815	-0.0245902
Cklf	28.5804	426.387	2.8131	1.56e-10	29.4298	1905.33	13.6681	1.41e-11	0.0066	26.7648	0.0627	0.0072	28.9705	0.0152	0.1143	0.1142	-2.0415	0	0	0	1.57e-05	0.176	3.2221	0.2072	2.7694	-0.150579	0.163465	1	1	-0.0761361	-0.0833333
Uap1l1	28.3678	629.25	4.5503	1.68e-13	29.6156	3042.71	24.1938	4.43e-10	0.0072	27.1218	0.0431	0.008	29.3231	0.0097	0.1362	0.1126	-2.1572	0	0	0	2.53e-05	0.195	3.0303	0.2345	2.5377	-0.168443	0.194113	1	1	-0.0750705	-0.1
Rpn2	27.3181	763.134	24.5087	0	29.671	733.529	20.5137	0	0.0321	26.3568	0.0346	0.0279	28.4954	0.0391	-0.2022	0.1126	0.1773	0	0	0	5.68e-07	0.8435	1.276	0.793	1.2169	0.0636822	0.048566	1	1	-0.0750507	0.150538
Crlf3	27.6861	597.423	5.189	4.59e-15	29.0877	1669.19	19.4582	1.98e-20	0.0087	26.4548	0.0443	0.0117	28.5823	0.0171	0.4242	0.1116	-1.3707	0	0	0	2.64e-08	0.2298	2.781	0.3334	2.1065	-0.310738	0.320199	1	1	-0.0744342	-0.25641
Rbmxl1	26.6718	3387.53	34.0927	5.66e-17	28.9874	2110.97	21.7818	2.78e-17	0.0101	26.4561	0.0078	0.0103	28.5766	0.0136	0.0348	0.1112	0.7929	2.66e-14	0	0	7.53e-05	0.2683	2.5097	0.2942	2.1861	-0.0880354	0.148026	1	1	-0.0742041	-0.0194175
Unc50	28.4134	282.377	3.0299	6.48e-24	28.3332	1676.41	19.8452	9.47e-21	0.0108	25.79	0.0912	0.0118	27.8446	0.0167	0.1355	0.1106	-2.4526	0	0	0	1.46e-05	0.2744	2.5722	0.3279	2.1166	-0.163159	0.215251	1	1	-0.0737881	-0.0847458
Tcf25	29.4146	844.585	5.5569	6.41e-13	30.9273	3674.42	36.2562	3.03e-17	0.0066	28.4061	0.0336	0.0098	30.6487	0.0084	0.5749	0.1096	-2.0027	0	0	0	6.4e-10	0.1863	3.1016	0.3028	2.1771	-0.384742	0.424647	1	1	-0.0731711	-0.326531
Snapc5	26.6183	824.929	12.3923	0	28.2615	1761.28	35.5155	0	0.015	25.7611	0.0314	0.0202	27.7937	0.0158	0.4279	0.1096	-0.9904	0	0	0	2.86e-18	0.3846	2.1278	0.5574	1.556	-0.310011	0.367481	1	1	-0.0731317	-0.257426
Bbip1	27.3197	857.419	8.2657	1.31e-19	29.2582	1187.73	10.6942	2.45e-18	0.0096	26.4639	0.0309	0.009	28.5306	0.0241	-0.1007	0.1085	-0.3589	0	0	0	1.32e-05	0.2545	2.702	0.2554	2.5125	-0.00352388	0.0754229	1	1	-0.072438	0.0666667
C1galt1c1	27.9419	886.199	6.3062	2.52e-13	29.6501	1832.22	18.7004	2.27e-26	0.0071	27.0557	0.0306	0.0102	29.1636	0.016	0.5204	0.1082	-0.9386	0	0	0	5.39e-07	0.1913	3.3023	0.298	2.4475	-0.358054	0.349254	1	1	-0.0722785	-0.303922
2410015M20Rik	27.7209	222.327	5.9434	0	28.9618	322.417	9.227	0	0.0268	24.6363	0.1109	0.0286	26.5485	0.0824	0.0941	0.1078	-0.4283	0	0	0	1.42e-08	0.6588	1.5036	0.7561	1.2661	-0.128687	0.187584	1	1	-0.0720267	-0.0629371
A430005L14Rik	28.5633	372.902	4.8056	0	29.235	1166.91	11.1247	5.12e-15	0.0129	26.4993	0.0712	0.0095	28.5126	0.0245	-0.4337	0.1056	-1.5408	0	0	0	3.16e-08	0.338	2.2897	0.2719	2.3299	0.243104	-0.017254	1	1	-0.0706109	0.357895
Ensa	27.6221	981.679	9.0843	1.46e-16	29.3378	1889.71	12.5517	2.77e-07	0.0093	26.8494	0.0273	0.0066	28.8619	0.0155	-0.4903	0.1043	-0.8206	0	0	0	4.55e-10	0.2468	2.7305	0.1905	2.9079	0.295538	-0.0610062	1	1	-0.0697286	0.409091
Slc35c2	26.4091	722.998	6.9871	1.13e-21	28.0777	1056.64	12.4877	2.05e-20	0.0096	25.4531	0.0355	0.0119	27.3288	0.0258	0.306	0.1026	-0.46	0	0	0	1.67e-06	0.2449	2.6727	0.3239	2.123	-0.243902	0.258926	1	1	-0.0686346	-0.193277
Hsp90b1	27.5275	314.343	7.147	0	27.75	1274.06	35.6653	0	0.0227	25.2927	0.0805	0.0279	27.1358	0.0214	0.2977	0.1015	-1.9141	0	0	0	3.4e-18	0.5732	1.6783	0.7539	1.2914	-0.239687	0.299597	1	1	-0.0679213	-0.18638
Cops5	26.7853	430.309	5.3682	4.21e-27	28.1729	623.98	7.5707	1.24e-16	0.0125	25.1916	0.0585	0.0121	26.9498	0.0432	-0.0459	0.0973	-0.4356	3.87e-15	0	0	9.69e-05	0.3127	2.3377	0.3266	2.0722	-0.0425597	0.128125	1	1	-0.0652398	0.0330579
Naa50	28.9858	1566.65	25.3373	0	30.9488	1862.59	23.415	2.09e-23	0.0162	28.4415	0.0181	0.0126	30.4187	0.0163	-0.3623	0.097	-0.1532	0	0	0	4.27e-08	0.4587	1.8729	0.3801	1.8943	0.206788	-0.011297	1	1	-0.0649995	0.285714
Sfr1	27.5193	1016.9	23.9352	0	29.5901	902.473	19.0631	0	0.0235	26.7713	0.0265	0.0211	28.6207	0.0318	-0.1522	0.0964	0.2628	0	1.19e-25	0	0.000113	0.6251	1.5839	0.5981	1.5044	0.045143	0.052845	1	1	-0.0646176	0.113744
Nfe2l2	29.7209	2904.9	26.0844	6.64e-23	32.2474	1264.48	9.6457	5.36e-14	0.009	29.4024	0.0101	0.0076	31.4246	0.0249	-0.2337	0.096	1.2942	0	0	0	2.59e-06	0.2646	2.6673	0.239	2.544	0.107113	0.048467	1	1	-0.0643509	0.184211
Mcm2	29.1994	2236.01	16.3588	8.93e-12	31.1966	2401.03	14.9872	4.72e-10	0.0073	28.8054	0.0129	0.0063	30.7778	0.0128	-0.2234	0.0956	-0.0142	0	0	7.45e-08	5.86e-07	0.2102	2.8613	0.1916	2.7657	0.0970772	0.0345663	1	1	-0.0640852	0.15873
2610001J05Rik	29.2816	1332.11	18.7821	0	31.5678	1000.5	18.0804	0	0.0141	28.6333	0.0216	0.018	30.5741	0.0307	0.358	0.0946	0.5079	0	0	0	3.51e-13	0.4017	2.0195	0.5499	1.5582	-0.269504	0.296047	1	1	-0.0634786	-0.216667
Ptpra	29.9603	1318.43	8.7396	2.91e-13	31.7436	1929.48	16.8331	1.15e-15	0.0066	29.2807	0.0223	0.0087	31.2231	0.0162	0.3978	0.0927	-0.4601	0	0	0	7.77e-07	0.1937	3.0395	0.2733	2.3227	-0.291255	0.308606	1	1	-0.0622104	-0.241379
Ndufa4	27.8762	1595.07	85.4735	0	29.8801	1260.22	56.6254	0	0.0535	27.3789	0.0172	0.045	29.178	0.0231	-0.2481	0.0918	0.4245	0	0	0	3.56e-18	1.4581	0.8511	1.3099	0.8496	0.113138	0.00176554	1	1	-0.0616595	0.188889
Vrk1	26.129	362.478	11.306	0	26.6279	1021.19	29.2931	0	0.0312	24.3561	0.0672	0.0287	25.9393	0.0255	-0.1223	0.0909	-1.3999	0	0	0	5.13e-05	0.7577	1.3648	0.7445	1.2725	0.01773	0.0725344	1	1	-0.0610348	0.087108
Tmem59	28.3149	990.1	42.6112	0	29.9541	1385.23	55.8285	0	0.043	27.515	0.0279	0.0407	29.2939	0.0211	-0.0791	0.0904	-0.4042	4.3e-27	0	0	4.75e-09	1.1825	1.0032	1.1746	0.8988	0.00672569	0.116155	1	1	-0.060726	0.0565111
Carkd	27.2245	521.7	4.0188	2.62e-14	27.7533	3554.28	27.5298	7.33e-13	0.0077	25.8601	0.0497	0.0077	27.5299	0.0078	0.0081	0.0903	-2.678	0.0288	0	0	1.7e-05	0.1991	3.0453	0.214	2.6687	-0.0696262	0.141117	1	1	-0.0606541	0
Leprotl1	28.0918	543.646	7.2469	0	29.0339	1350.13	20.4541	0	0.0133	26.6936	0.0491	0.0152	28.4015	0.021	0.1877	0.0895	-1.2255	0	0	0	4.34e-07	0.3547	2.239	0.4278	1.823	-0.170874	0.228195	1	1	-0.0601341	-0.125
Tmco1	26.8133	1254.83	20.4994	0	28.6285	1148.4	17.7206	0	0.0163	26.2379	0.021	0.0154	27.9134	0.0244	-0.0832	0.0893	0.2176	0	0	0	0.000209	0.4275	1.9848	0.428	1.8248	-0.00116822	0.0876808	1	1	-0.0600249	0.0584416
Canx	29.5684	3077.88	38.8517	0	32.08	1038.53	19.2193	0	0.0126	29.2696	0.0096	0.0185	31.089	0.0299	0.5576	0.087	1.6444	0	9.4e-27	0	7.69e-24	0.3698	2.1145	0.5719	1.4916	-0.353383	0.417605	1	1	-0.0585223	-0.318919
Atox1	26.9332	435.599	17.9599	0	27.7798	846.495	40.3073	0	0.0414	25.3236	0.0581	0.0476	26.8841	0.0318	0.2015	0.0863	-0.8674	0	3.13e-26	0	6.07e-25	1.0323	1.1016	1.2778	0.8346	-0.192127	0.319914	1	1	-0.0580455	-0.130252
Rraga	27.0889	678.895	5.6922	5.82e-14	29.5515	430.452	3.9852	1.71e-17	0.0084	26.0366	0.0384	0.0093	27.6334	0.0643	0.1433	0.0859	0.7427	0	0	0	2.98e-05	0.218	2.9361	0.255	2.4732	-0.145098	0.187166	1	1	-0.0577851	-0.0967742
Srp14	27.4673	1453.4	31.6195	0	29.2785	1223.16	27.9611	0	0.0216	26.9283	0.0187	0.0229	28.5797	0.0234	0.0811	0.0859	0.3186	5.43e-21	4.56e-27	0	1.7e-07	0.5792	1.6506	0.654	1.3982	-0.114373	0.180518	1	1	-0.0577823	-0.0567686
Fcf1	27.662	1493.12	24.9854	0	30.1572	640.337	10.0373	0	0.0167	27.1286	0.0183	0.0157	28.787	0.045	-0.0883	0.0856	1.299	5.82e-23	0	0	0.000113	0.447	1.9177	0.4507	1.7382	-0.00820945	0.103268	1	1	-0.0576093	0.0636943
Pde6d	27.7567	2590.37	21.6392	1.65e-16	29.6176	1813.11	17.9292	4.88e-21	0.0083	27.454	0.0107	0.0099	29.1288	0.0161	0.2439	0.0854	0.5943	0	0	0	1.45e-05	0.2298	2.7991	0.2878	2.2779	-0.201529	0.228807	1	1	-0.0574964	-0.161616
Stoml2	28.08	1037.73	14.4437	0	29.8824	942.971	12.164	2.58e-23	0.0139	27.3074	0.0266	0.0129	28.9441	0.0307	-0.1012	0.084	0.2071	0	4.03e-26	0	0.000102	0.3757	2.1009	0.373	1.9447	0.00723861	0.0803209	1	1	-0.0565469	0.0775194
Crcp	29.1108	2683.78	19.1991	7.3e-14	31.47	1013.31	7.8749	9.54e-13	0.0072	28.7792	0.0107	0.0078	30.4997	0.03	0.1236	0.0838	1.4864	0	0	0	2.83e-05	0.205	2.973	0.236	2.5068	-0.131356	0.185974	1	1	-0.0564104	-0.0769231
Hspd1	28.2742	721.769	8.8897	3.47e-26	29.1988	2274.81	36.5504	0	0.0123	27.2003	0.0377	0.016	28.8147	0.0127	0.3795	0.0832	-1.5651	0	0	0	3.51e-10	0.3349	2.2413	0.4621	1.7435	-0.275265	0.285518	1	1	-0.056027	-0.23125
Dnajc3	25.7033	429.613	5.982	0	27.2683	439.1	6.5974	0	0.0139	24.2377	0.0565	0.015	25.6405	0.0587	0.1063	0.0812	0.0555	0	2.02e-24	8.79e-15	4.34e-05	0.337	2.2631	0.3824	1.9414	-0.118724	0.165705	1	1	-0.0547103	-0.0733333
Manbal	29.3429	1632.74	14.7125	2e-19	31.7455	733.816	5.3444	4.09e-13	0.009	28.8042	0.0177	0.0073	30.4114	0.0414	-0.2953	0.0783	1.2227	0	2.05e-16	0	1.68e-07	0.2587	2.653	0.2214	2.6525	0.168473	0.000188501	1	1	-0.0528486	0.232877
Srp9	26.959	921.997	34.9232	0	28.5501	861.408	27.7476	0	0.0378	26.1827	0.0285	0.0323	27.6186	0.032	-0.2296	0.077	0.1689	0	0	0	1.49e-11	0.9905	1.1534	0.887	1.131	0.116685	0.0198055	1	1	-0.0519903	0.170279
Cct5	26.718	1304.13	32.7362	0	28.3903	1016.47	26.3317	0	0.0251	26.1771	0.0201	0.0259	27.6092	0.0273	0.0434	0.0768	0.437	1.45e-26	0	0	4.92e-06	0.6587	1.5015	0.7147	1.3071	-0.0783546	0.148726	1	1	-0.0518704	-0.030888
Tbc1d15	30.047	3467.52	44.1154	0	32.3424	1096.1	12.1116	6.56e-26	0.0127	29.7695	0.0086	0.0111	31.3943	0.0286	-0.1967	0.0767	1.7295	0	1.49e-23	0	8.51e-06	0.3769	2.0853	0.3458	2.0396	0.0899364	0.0224064	1	1	-0.0517546	0.144144
Hsp90aa1	27.152	2104.22	58.0625	0	28.626	2147.44	75.2947	0	0.0275	26.7943	0.0128	0.0351	28.2265	0.0131	0.3506	0.0751	0.037	0	1.84e-25	1.65e-05	8.45e-22	0.7395	1.4085	0.9866	1.0999	-0.250456	0.280571	1	1	-0.0507396	-0.216524
Cyc1	25.7256	395.353	9.6092	0	27.1305	401.732	8.9838	0	0.0243	24.1263	0.0614	0.0224	25.4049	0.0633	-0.1164	0.0745	0.0431	0	0	2.23e-23	7.76e-05	0.5831	1.6369	0.568	1.5066	0.0265845	0.0864861	1	1	-0.0503289	0.0848214
Rac2	47.3323	3672.79	218.24	0	50.0186	3091.28	177.659	0	0.0595	46.7079	0.0127	0.0579	49.1776	0.0159	-0.0377	0.0743	0.3191	1.61e-13	8.91e-18	0	7.12e-05	2.7759	0.3743	2.8204	0.3071	-0.0157779	0.218821	1	1	-0.05022	0.0276339
Nfkbia	27.4176	543.94	23.237	0	27.8891	1777.69	75.638	0	0.043	26.081	0.0479	0.0424	27.4411	0.0155	-0.0191	0.0733	-1.6229	1.14e-06	3.85e-21	0	4.77e-06	1.1112	1.1024	1.1598	0.9743	-0.0419038	0.131479	1	1	-0.0495643	0.0141509
Mtfr1l	27.4911	1790.97	12.2672	9e-10	29.5531	784.97	6.4014	6.13e-12	0.0069	27.0627	0.0151	0.0082	28.4665	0.0362	0.255	0.073	1.2617	0	0	0	1.98e-05	0.185	3.1209	0.2321	2.5574	-0.20293	0.220341	1	1	-0.0493141	-0.158537
Nmd3	29.0406	792.796	5.6567	2.21e-13	29.7542	2958.2	19.9554	1.24e-08	0.0072	27.9889	0.0353	0.0067	29.4399	0.01	-0.0895	0.0729	-1.8131	7.56e-22	9.03e-21	0	6.55e-06	0.1986	2.9655	0.1976	2.6978	0.00506073	0.099229	1	1	-0.0492869	0.0746269
Sdhc	28.7099	923.25	8.845	3.49e-19	29.8515	1515.07	15.2905	6.63e-20	0.0096	27.8132	0.0302	0.0101	29.2518	0.0193	0.0765	0.0728	-0.6438	6.42e-17	1.81e-20	0	4.87e-05	0.2639	2.5799	0.2931	2.2158	-0.0996247	0.16432	1	1	-0.0491799	-0.049505
Coro1c	29.9948	512.03	5.0849	1.87e-18	30.6905	1019.24	10.7203	2.21e-19	0.01	28.3137	0.0552	0.0105	29.7731	0.0292	0.0792	0.0725	-0.9198	1.47e-24	9.79e-17	0	0.000101	0.2802	2.4387	0.3119	2.1381	-0.101635	0.140592	1	1	-0.0490174	-0.047619
Eif3l	31.075	3635.74	42.3493	1.73e-25	32.7546	2931.17	36.2639	2.05e-26	0.0116	30.7994	0.0085	0.0124	32.368	0.011	0.0929	0.0717	0.3703	3.18e-18	0	0	0.000123	0.3603	2.1025	0.3982	1.8412	-0.0951783	0.141918	1	1	-0.0484614	-0.0645161
H1f0	25.9531	802.606	29.137	0	27.0362	1128.86	36.5525	0	0.0363	25.1221	0.0314	0.0324	26.3911	0.0234	-0.164	0.0711	-0.4225	0	0	0	0.000143	0.909	1.3303	0.8536	1.3123	0.0649016	0.0137164	1	1	-0.0480844	0.12037
Dapp1	28.6	919.815	6.7868	5.97e-15	29.7881	1349.36	11.1995	5.49e-13	0.0074	27.7348	0.0302	0.0083	29.13	0.0216	0.1696	0.0708	-0.4845	0	0	0	2.65e-05	0.2049	3.0229	0.2409	2.5571	-0.14944	0.182159	1	1	-0.0478956	-0.108434
Mrpl15	28.8325	878.792	8.3365	8.14e-21	30.1044	1094.22	12.6635	9.41e-23	0.0095	27.9016	0.0318	0.0115	29.2678	0.0269	0.2824	0.069	-0.241	0	4.7e-24	0	3.01e-06	0.2641	2.5412	0.3356	2.0487	-0.213051	0.240396	1	1	-0.0466793	-0.173913
Actr10	29.0748	1557.62	12.4531	3.96e-12	30.8084	993.406	7.6644	1.62e-08	0.008	28.523	0.0183	0.0077	29.8616	0.03	-0.0457	0.0662	0.7117	4.42e-07	1.1e-13	0	1.14e-05	0.2274	2.7726	0.2297	2.5667	-0.0100131	0.0802197	1	1	-0.0448268	0.038961
Ywhah	31.632	1159.36	47.3703	0	32.7441	1995.31	86.4654	0	0.0409	30.7716	0.0265	0.0433	32.1903	0.0162	0.0813	0.065	-0.7142	4.15e-26	1.36e-20	0	3.48e-10	1.2529	0.9492	1.3874	0.7812	-0.0969439	0.215054	1	1	-0.0440723	-0.0554273
Hnrnpab	28.4475	713.274	13.4417	0	29.8902	670.098	12.5112	0	0.0189	27.3463	0.0383	0.0187	28.6014	0.0427	-0.0093	0.0647	0.1559	5.76e-05	0	0	7.48e-05	0.5155	1.7392	0.5362	1.5619	-0.038605	0.113516	1	1	-0.0438825	0.0106952
Pigt	28.5928	1238.69	13.5954	1.83e-19	29.9162	1233.44	11.9613	3.57e-15	0.011	27.9349	0.0226	0.0097	29.1954	0.0237	-0.1783	0.0637	0.0702	0	0	0	7.11e-06	0.3063	2.3078	0.2838	2.2198	0.0792812	0.0396432	1	1	-0.0431746	0.134021
Lsm14a	26.7893	511.484	10.2478	0	28.0371	523.802	9.7504	0	0.0201	25.4424	0.0497	0.0188	26.5881	0.0506	-0.0988	0.0635	0.0269	3.47e-22	1.31e-12	3.27e-08	3.86e-05	0.5094	1.7595	0.4919	1.6409	0.0355763	0.0722774	1	1	-0.0430907	0.0691489
Rps18	50.6215	2593.71	172.333	0	52.5932	3821.36	259.097	0	0.0671	49.6115	0.0191	0.0681	51.8392	0.0135	0.0227	0.0634	-0.4955	0.00195	5.44e-09	0	0	3.2891	0.3074	3.4962	0.283	-0.0592357	0.0862191	1	1	-0.0429733	-0.0146843
Rab7	29.6455	1681.37	47.8901	0	30.9121	1922.69	56.9537	0	0.0285	29.1215	0.0174	0.0295	30.4009	0.016	0.0515	0.062	-0.1196	4.09e-27	0	0	1.69e-06	0.8303	1.2812	0.8965	1.1237	-0.0738427	0.140162	1	1	-0.0420843	-0.0338983
Ube2w	27.6603	1806.79	13.5422	9.91e-15	29.2941	891.229	8.2156	4.04e-16	0.0075	27.2398	0.0151	0.0092	28.3499	0.0318	0.2995	0.0576	1.0766	0	0	0	1.37e-05	0.2049	2.9538	0.2612	2.3895	-0.215544	0.236158	1	1	-0.0391571	-0.184783
Ybx1	46.2263	1539.03	98.2816	0	47.1678	4374.16	225.867	0	0.0644	44.838	0.0291	0.0518	46.6335	0.0106	-0.3136	0.0566	-1.4485	0	3.52e-08	0	0	2.8545	0.3638	2.4031	0.4436	0.187841	-0.179892	1	1	-0.0385024	0.243243
Eef1b2	25.7925	597.516	17.5048	0	26.1393	1463.35	49.7349	0	0.0293	24.7017	0.0414	0.0339	25.6694	0.0176	0.2108	0.0554	-1.2315	0	0	0	6.91e-14	0.7198	1.448	0.8732	1.1606	-0.175676	0.247631	1	1	-0.0376986	-0.135693
Ezr	28.4679	549.948	5.9304	7.5e-20	28.3642	3152.25	42.8793	4.35e-26	0.0108	27.0552	0.0492	0.0136	28.1013	0.0089	0.3325	0.0547	-2.4628	0	1.46e-18	0	4.08e-07	0.291	2.4584	0.3844	1.9703	-0.242976	0.247729	1	1	-0.037226	-0.205882
Drg1	29.2802	2726.84	28.5751	3.15e-21	30.7134	1471.55	17.0049	1.12e-20	0.0105	28.9477	0.0106	0.0116	30.0629	0.0204	0.1448	0.0545	0.943	0	4.35e-21	0	1.46e-05	0.3023	2.371	0.3459	1.9729	-0.126048	0.201784	1	1	-0.0370956	-0.0948276
Samm50	28.7446	2440.91	36.1924	0	30.0954	1512.59	23.5948	0	0.0148	28.3966	0.0117	0.0156	29.4889	0.0196	0.0714	0.0545	0.7511	0	7.45e-24	0	5.59e-05	0.4208	1.9478	0.4588	1.7007	-0.0828248	0.145293	1	1	-0.0370411	-0.0512821
Clptm1l	29.3254	1713.46	11.3778	3.36e-11	31.0339	861.024	6.9551	8.03e-12	0.0066	28.8213	0.0168	0.0081	29.9296	0.0348	0.2803	0.0544	1.05	0	0	0	1.69e-05	0.1918	3.0339	0.2403	2.468	-0.201831	0.229295	1	1	-0.0370302	-0.185185
Cisd2	27.4333	478.775	6.9514	0	28.4484	503.904	7.423	6.57e-26	0.0145	25.9406	0.0542	0.0148	26.9121	0.0534	0.0249	0.053	-0.0216	4.74e-14	0	2.6e-13	8.12e-05	0.3769	2.1336	0.3948	1.8741	-0.0453394	0.138466	1	1	-0.036099	-0.0202703
Gps2	29.6763	383.947	3.4672	5.31e-18	29.1489	1501.72	15.3984	2.28e-19	0.009	27.5377	0.0718	0.0103	28.5635	0.019	0.1888	0.0528	-1.9195	0	0	0	5.77e-05	0.2489	2.6743	0.2897	2.3085	-0.140835	0.158458	1	1	-0.035913	-0.126214
1110008F13Rik	29.6781	1273.67	71.5509	0	31.0986	924.012	55.827	0	0.0562	28.9911	0.0228	0.0607	30.0692	0.0325	0.1098	0.0527	0.5134	0	5.98e-18	0	7.66e-12	1.6277	0.7622	1.8181	0.5997	-0.104725	0.270969	1	1	-0.035854	-0.0741351
Gadd45g	27.5842	558.856	8.6892	0	28.1298	872.564	17.8149	0	0.0155	26.2721	0.0471	0.0204	27.2351	0.0312	0.3956	0.0519	-0.5956	0	0	0	1.56e-09	0.4086	2.2233	0.5545	1.7647	-0.26312	0.259874	1	1	-0.0353588	-0.240196
Ube2b	26.524	1132.97	35.4999	0	27.2493	1823.1	58.391	0	0.0314	25.9062	0.0229	0.032	26.827	0.0148	0.0276	0.0504	-0.6306	0.000516	1.71e-22	0	3.34e-07	0.8126	1.3206	0.8544	1.1703	-0.0489232	0.128429	1	1	-0.0343236	-0.01875
Pdcd6ip	27.3038	2144.85	15.6232	8.86e-12	28.9721	760.326	5.5869	2.42e-09	0.0073	26.942	0.0126	0.0074	27.8915	0.0367	0.0187	0.05	1.5362	0.00169	2.28e-16	0	7.41e-06	0.1951	3.0401	0.2047	2.7582	-0.0468979	0.102204	1	1	-0.0340426	-0.0135135
Pmf1	27.9956	1230.12	25.1599	0	29.2332	905.709	16.9798	0	0.0204	27.3541	0.0223	0.0187	28.3068	0.0314	-0.1263	0.0494	0.4925	0	4.45e-22	0	6.55e-05	0.5574	1.6707	0.5305	1.5928	0.0507069	0.0489076	1	1	-0.0336562	0.0909091
Tmem33	29.4188	799.96	8.1079	3.84e-19	29.5531	4155.07	46.0665	1.86e-25	0.0101	28.3613	0.0355	0.0111	29.3367	0.0071	0.1283	0.0488	-2.3256	0	6.44e-27	0	4.1e-05	0.2863	2.4988	0.3267	2.1111	-0.123661	0.183648	1	1	-0.0332485	-0.0900901
Mrpl51	29.8373	889.339	9.5375	1.03e-22	30.5555	1326.57	15.7372	2.95e-27	0.0107	28.8581	0.0325	0.0119	29.839	0.0225	0.1475	0.0482	-0.5312	0	5.39e-18	0	7.37e-05	0.3094	2.3525	0.3512	2.0267	-0.119021	0.160754	1	1	-0.0328731	-0.10084
Rheb	25.8487	288.922	11.3514	0	25.8744	469.188	16.1972	0	0.0393	23.7093	0.0822	0.0346	24.5119	0.0523	-0.1853	0.048	-0.6527	0	6.87e-23	0	3.82e-09	0.9293	1.1926	0.8461	1.1707	0.0983335	0.0187068	1	1	-0.0327433	0.135838
Ubl7	30.5445	4690	39.5286	1.73e-23	33.0656	607.161	4.9029	4.01e-14	0.0084	30.3255	0.0065	0.0081	31.3403	0.0516	-0.0492	0.0475	2.9775	7.08e-13	2.56e-11	0	1.68e-05	0.2556	2.6986	0.2524	2.4743	0.0126783	0.0906519	1	1	-0.03238	0.037037
Rpia	26.6594	903.937	9.8	1.88e-16	27.6	886.101	9.3504	3.95e-15	0.0108	25.8853	0.0287	0.0105	26.7445	0.0303	-0.0399	0.0471	0.0789	2.54e-08	1.31e-09	1.87e-17	3.83e-05	0.2798	2.4514	0.2811	2.2163	-0.00462469	0.106078	1	1	-0.0321262	0.0285714
Gtf2b	29.1396	1525.52	13.3592	1.83e-18	30.3234	1150.73	13.3176	2.77e-24	0.0088	28.5742	0.0188	0.0115	29.5145	0.0258	0.3994	0.0467	0.4604	0	6.36e-20	0	1.75e-07	0.2496	2.6656	0.3375	2.068	-0.260444	0.288975	1	1	-0.0318589	-0.234783
Parl	28.0737	504.625	9.7682	0	28.8278	581.729	10.6643	0	0.0194	26.5853	0.0528	0.0184	27.4467	0.0471	-0.0721	0.046	-0.164	0	0	0	7.08e-05	0.5157	1.7632	0.5013	1.6327	0.0287253	0.079929	1	1	-0.0313845	0.0543478
Vti1b	25.9644	1010.26	9.1256	4.01e-12	26.749	1079.9	12.1924	1.01e-18	0.0091	25.2995	0.025	0.0113	26.0852	0.0243	0.3153	0.0441	-0.0427	0	0	6.9e-14	7.76e-06	0.2279	2.8026	0.2941	2.2534	-0.225094	0.243721	1	1	-0.0301205	-0.19469
Serp1	34.4008	3514.59	138.852	0	35.4218	3581.22	169.724	0	0.0395	34.0483	0.0097	0.0474	35.0588	0.0098	0.2617	0.0422	0.0149	0	6.44e-24	9.82e-10	0	1.349	0.9022	1.6613	0.6835	-0.187985	0.319971	1	1	-0.028823	-0.166667
Glud1	30.9399	1144.56	11.798	9.83e-24	31.6828	1475.02	18.4467	0	0.0103	30.1018	0.0264	0.0125	30.9917	0.021	0.2841	0.042	-0.3309	0	2.84e-15	0	3.09e-06	0.3089	2.3462	0.3863	1.9358	-0.200362	0.212005	1	1	-0.0287141	-0.176
Naa38	28.3213	1188.03	10.7762	2.23e-20	28.9671	1646.57	19.6372	4.94e-22	0.0091	27.6432	0.0233	0.0119	28.4569	0.0174	0.3918	0.0419	-0.4216	0	0	0	4.72e-08	0.2506	2.6203	0.3399	2.0134	-0.262724	0.30143	1	1	-0.0285941	-0.235294
Ssr1	27.0931	1594.36	16.4937	1.45e-22	28.2509	922.08	11.7776	3.09e-21	0.0104	26.6219	0.0167	0.0128	27.4043	0.0298	0.3014	0.0418	0.835	0	0	0	3.68e-07	0.2731	2.544	0.3505	2.019	-0.220827	0.26003	1	1	-0.0285503	-0.1875
Arpc5l	26.7923	1822.14	43.3044	0	28.216	738.078	14.6486	0	0.0237	26.3866	0.0146	0.0198	27.1523	0.0369	-0.2586	0.0413	1.3423	0	1.49e-11	0	1.29e-07	0.6251	1.6024	0.5369	1.6265	0.164276	-0.0148171	1	1	-0.0282002	0.19697
Trappc6b	26.1475	1922.52	29.571	0	27.3704	856.482	15.3751	0	0.0153	25.7761	0.0135	0.018	26.5181	0.031	0.2277	0.0409	1.1999	0	0	0	4.32e-08	0.394	2.0857	0.4756	1.693	-0.171573	0.231955	1	1	-0.0279809	-0.15
Mrpl27	31.0326	774.112	6.5091	2.62e-18	31.1587	1835.26	16.6168	2.75e-16	0.0084	29.8046	0.0386	0.009	30.6212	0.0168	0.1056	0.039	-1.1989	0	5.07e-17	0	6.8e-05	0.2484	2.6407	0.277	2.3243	-0.103249	0.136127	1	1	-0.0266678	-0.0666667
Pitpna	27.3628	432.128	6.251	0	27.7001	573.62	11.5781	0	0.0145	25.7109	0.0594	0.0202	26.413	0.046	0.4778	0.0389	-0.3682	0	1.88e-23	0	7.44e-15	0.3699	2.2025	0.5323	1.6503	-0.305091	0.334606	1	1	-0.0265816	-0.282178
Cnppd1	27.403	1011.53	9.3755	3.08e-19	28.0606	1150.31	14.1245	0	0.0093	26.6681	0.0264	0.0123	27.379	0.0238	0.4064	0.038	-0.15	0	1.05e-13	0	3.59e-07	0.2477	2.703	0.3359	2.0953	-0.262578	0.29003	1	1	-0.0259652	-0.243902
Cdc26	25.817	211.573	3.4405	0	25.0645	402.95	7.4932	0	0.0162	22.9684	0.109	0.0186	23.5689	0.0591	0.1931	0.0372	-0.883	0	3.88e-16	0	3.4e-06	0.3714	2.1583	0.4369	1.7965	-0.14992	0.201392	1	1	-0.0254785	-0.129032
Atp5e	27.6132	656.238	27.5469	0	28.0017	925.445	41.1953	0	0.0419	26.4773	0.0404	0.0445	27.1649	0.0294	0.087	0.037	-0.4618	0	5.11e-16	0	8.27e-08	1.1077	1.0171	1.2091	0.8658	-0.083864	0.174752	1	1	-0.0253121	-0.058427
Rbm22	28.3831	1079.82	15.9101	1.54e-26	28.8891	1564.34	19.2559	1.64e-23	0.0147	27.6385	0.0256	0.0123	28.3554	0.0182	-0.2599	0.0369	-0.4953	0	1.2e-18	0	7.3e-07	0.4056	2.0295	0.3499	2.0178	0.159188	0.00579839	1	1	-0.0252827	0.195122
Fubp1	28.7909	735.071	5.1403	1.32e-10	28.6088	4123.31	35.3881	4.19e-12	0.007	27.6902	0.0377	0.0086	28.3923	0.0069	0.2897	0.0361	-2.4446	0	1.3e-11	0	2.01e-05	0.1937	2.9823	0.2435	2.4396	-0.204517	0.222455	1	1	-0.0247285	-0.186047
Dgat1	27.3928	1630.76	11.8126	4.18e-13	28.2781	1191.22	15.7369	6.35e-27	0.0072	26.9186	0.0165	0.0132	27.6	0.0232	0.869	0.0361	0.4872	0	9.86e-08	0	3.58e-16	0.1934	3.1034	0.3619	2.0192	-0.465598	0.536945	1	1	-0.0246884	-0.454545
Sptssa	30.4954	503.973	21.827	0	30.7108	723.53	27.4701	0	0.0433	28.7177	0.057	0.0381	29.4393	0.0406	-0.1863	0.0358	-0.4891	0	1.66e-09	0	5.42e-14	1.2314	0.9643	1.1139	0.9421	0.105485	0.0235644	1	1	-0.0245115	0.136483
Dph3	26.5199	1296.08	14.0407	4.98e-21	27.7445	668.176	8.1766	6.13e-23	0.0109	25.9757	0.02	0.0123	26.6168	0.0398	0.174	0.0352	0.9918	0	1.82e-07	0	3.67e-05	0.2817	2.5366	0.324	2.1456	-0.130556	0.182233	1	1	-0.0240863	-0.113821
Pa2g4	27.5583	369.393	5.9079	0	27.1263	840.169	15.0722	0	0.016	25.6239	0.0698	0.0179	26.2551	0.0314	0.1641	0.0351	-1.1523	0	4.24e-07	0	4.1e-05	0.4076	1.9955	0.4692	1.7167	-0.131287	0.162405	1	1	-0.024041	-0.106145
Ubc	37.9449	2601.31	166.058	0	38.8489	2799.24	159.933	0	0.0642	37.3759	0.0144	0.0575	38.291	0.0137	-0.1573	0.0349	-0.0727	0	5.81e-10	0	0	2.3907	0.4833	2.1883	0.4785	0.0924919	0.0100313	1	1	-0.0238986	0.116522
2310011J03Rik	28.9908	826.77	11.5052	0	29.0111	2618.33	44.5121	0	0.0139	27.9849	0.0341	0.017	28.6699	0.011	0.2899	0.0349	-1.6334	0	4.65e-16	0	7.95e-09	0.3875	2.0898	0.4842	1.6773	-0.199711	0.245931	1	1	-0.0238927	-0.182353
Ssrp1	27.4378	1090.61	15.7944	0	29.3041	426.311	6.2105	0	0.0145	26.7521	0.0246	0.0146	27.4019	0.0643	0.0082	0.0346	1.3893	0.00347	2.68e-15	0	0.000235	0.3872	2.0349	0.3988	1.8593	-0.0290873	0.0944441	1	1	-0.0237137	-0.00684932
Daglb	28.5985	832.301	6.1994	2.26e-14	28.8382	1467.62	11.2617	1.12e-12	0.0074	27.6152	0.0335	0.0077	28.2691	0.0195	0.0465	0.0338	-0.7789	0	3.55e-12	0	1.88e-05	0.2036	2.9816	0.2175	2.6134	-0.063908	0.140889	1	1	-0.0231313	-0.038961
Ptbp1	27.3638	1015.75	6.28	5.99e-08	28.2028	819.392	6.0788	1.71e-09	0.0062	26.6361	0.0262	0.0074	27.2504	0.0334	0.2597	0.0329	0.3482	0	0	0	1.72e-05	0.1648	3.2581	0.202	2.6715	-0.184158	0.219577	1	1	-0.0225428	-0.162162
Farsa	29.1399	506.269	3.6461	1.27e-13	28.5659	2126.15	19.6119	1.23e-14	0.0072	27.5423	0.0544	0.0092	28.176	0.0133	0.3545	0.0328	-2.0309	0	0	0	5.61e-06	0.1981	2.9519	0.2601	2.3283	-0.23837	0.267835	1	1	-0.0224908	-0.217391
Eif1ad	28.3896	1726.63	15.1176	1.51e-21	28.9279	2281.92	14.5816	3.65e-10	0.0087	27.9201	0.0162	0.0064	28.5439	0.0126	-0.4585	0.0319	-0.3626	0	6.84e-14	0	1.32e-10	0.2439	2.7287	0.1811	2.9479	0.34677	-0.074358	1	1	-0.0218541	0.359375
Timm13	25.8427	759.53	18.3319	0	28.2651	265.563	7.8713	0	0.0241	24.9832	0.033	0.0297	25.527	0.096	0.3011	0.0311	1.5392	0	0	0	5.09e-15	0.603	1.5995	0.7556	1.2598	-0.201959	0.269646	1	1	-0.0213029	-0.188552
Tor2a	28.7498	1712.73	12.4524	2.48e-15	29.7355	1020.22	7.9785	1.7e-13	0.0073	28.2605	0.0165	0.0078	28.8756	0.0283	0.1026	0.0311	0.7803	0	7.68e-11	0	2.55e-05	0.2051	2.9313	0.2254	2.5904	-0.0900621	0.131601	1	1	-0.0213017	-0.0641026
Snrnp27	28.7178	1005.87	16.6946	0	28.9	2105.64	35.6765	0	0.0166	27.899	0.0278	0.017	28.503	0.0136	0.0323	0.0309	-1.0335	1.75e-16	0	0	0.000141	0.4608	1.8759	0.4855	1.6709	-0.0508754	0.122688	1	1	-0.0211908	-0.0235294
Elavl1	28.8704	1857.88	34.4554	0	29.7412	1225.08	20.5443	0	0.0186	28.4167	0.0153	0.0168	29.0271	0.0237	-0.1474	0.0307	0.6338	0	2.12e-12	0	1.64e-05	0.5286	1.6966	0.4863	1.6444	0.0869833	0.0317441	1	1	-0.0210286	0.107143
Cox14	26.1609	836.537	18.4035	0	27.6107	417.427	10.124	0	0.0219	25.3452	0.0305	0.0243	25.8723	0.0619	0.149	0.0297	1.0202	0	4.06e-09	0	2.21e-07	0.555	1.6901	0.6238	1.422	-0.110292	0.188537	1	1	-0.0203731	-0.0987654
Traf3ip3	30.0738	1254.26	8.0561	6.93e-16	30.284	2495.29	22.6271	9.75e-19	0.0064	29.3511	0.0234	0.0091	29.907	0.012	0.4954	0.0271	-0.9636	0	0.000168	0	8.67e-07	0.1882	3.1206	0.272	2.362	-0.308088	0.321169	1	1	-0.0185876	-0.296703
Taf10	31.1826	685.719	3.41	4.57e-08	30.6156	3644.18	25.5727	9.04e-11	0.005	29.8074	0.0436	0.007	30.3567	0.0083	0.4983	0.0263	-2.3865	0	4.17e-06	0	6.27e-06	0.1478	3.5118	0.2136	2.7029	-0.308052	0.299271	1	1	-0.0180949	-0.285714
Nrbp1	27.5235	3124.77	26.74	3.47e-15	28.0736	2577.67	20.972	3.25e-10	0.0085	27.2744	0.0088	0.0081	27.7548	0.0108	-0.0691	0.0252	0.2872	4.32e-20	7.38e-21	0	5.76e-06	0.2342	2.7549	0.2264	2.5774	0.0344523	0.0688679	1	1	-0.0173087	0.0493827
Dguok	28.7008	797.097	4.8757	6.28e-11	29.2076	797.129	6.8233	7.95e-14	0.0061	27.6832	0.0347	0.0086	28.1664	0.0354	0.4818	0.025	0.0273	0	1.14e-14	6.51e-07	4.61e-06	0.1679	3.3599	0.2412	2.5761	-0.303897	0.304258	1	1	-0.0171552	-0.290698
Eif4ebp1	29.0701	815.732	23.7475	0	29.5265	865.522	27.9021	0	0.0291	28.0526	0.0345	0.0324	28.5331	0.0329	0.1543	0.0245	-0.069	0	4.21e-20	2.14e-14	6.18e-11	0.8144	1.344	0.9167	1.1134	-0.111596	0.207113	1	1	-0.0168401	-0.101852
Pbdc1	28.5782	801.625	9.189	8.3e-23	28.5312	1681.68	19.4512	4.03e-19	0.0114	27.5754	0.0345	0.0115	28.0356	0.0167	0.0131	0.0239	-1.045	0.00652	2.08e-07	0	0.000116	0.314	2.2875	0.3231	2.0719	-0.0281647	0.104059	1	1	-0.0164148	-0.00869565
Rchy1	28.1496	1882.6	20.9712	2.42e-27	28.823	1254.29	17.1079	3.67e-24	0.0111	27.7203	0.0147	0.0136	28.1616	0.0225	0.2909	0.0228	0.6113	0	4.85e-05	0	3.12e-06	0.3089	2.3773	0.3837	1.9549	-0.194944	0.216072	1	1	-0.0156703	-0.183824
Rtn3	30.2943	360.222	6.2276	0	29.1292	1093.32	24.0514	0	0.0173	27.9211	0.0774	0.022	28.3621	0.0259	0.3448	0.0226	-1.5773	0	2.87e-09	0	3.81e-13	0.4806	1.791	0.6239	1.4131	-0.229684	0.267426	1	1	-0.0155489	-0.213636
Ppil2	28.9501	1504.86	14.1586	3.76e-21	29.3539	1600.23	16.3265	8.98e-18	0.0094	28.3905	0.0189	0.0102	28.8085	0.0181	0.1173	0.0211	-0.0664	0	3.28e-10	6.7e-15	6.39e-05	0.2663	2.5581	0.2936	2.2306	-0.0929837	0.146821	1	1	-0.0145096	-0.0784314
Hspa4	26.035	1115.01	7.3775	3.69e-09	27.3579	458.111	4.0553	1.52e-11	0.0066	25.4201	0.0229	0.0088	25.7839	0.0565	0.4193	0.0205	1.3044	0	0.00322	0	4.39e-06	0.1676	3.296	0.226	2.5198	-0.258407	0.30804	1	1	-0.0141096	-0.25
Rps5	46.7557	2324.64	148.843	0	47.221	2806.05	193.093	0	0.0641	45.8143	0.0197	0.0693	46.4015	0.0165	0.1131	0.0184	-0.2574	2.95e-27	2.51e-17	0	0	2.9329	0.3837	3.185	0.3297	-0.0791523	0.163785	1	1	-0.0126548	-0.0750361
Eif3d	29.1924	3104.43	25.1577	7.51e-16	29.7968	1628.03	16.2782	4.55e-15	0.0081	28.8965	0.0094	0.01	29.248	0.018	0.3093	0.0174	0.9409	0	3.02e-10	0	4.82e-06	0.2327	2.7252	0.2928	2.1747	-0.20526	0.253138	1	1	-0.0120179	-0.19
U2af1	30.5149	598.012	23.0753	0	29.6662	2690.76	86.4939	0	0.0387	29.0148	0.0485	0.0322	29.3397	0.0109	-0.266	0.0161	-2.1505	0	3.12e-16	0	3.27e-19	1.1167	1.0603	0.9462	1.0895	0.180194	-0.0268013	1	1	-0.0110737	0.201863
Commd6	28.8119	321.565	3.8913	0	28.3458	477.076	6.7681	1.01e-25	0.0121	26.4309	0.0821	0.0142	26.7264	0.0562	0.2228	0.016	-0.5469	0	3.44e-08	0	2.25e-05	0.319	2.3419	0.3768	1.9719	-0.153397	0.187636	1	1	-0.0110565	-0.147887
Sdf4	27.9123	1114.15	18.7141	0	27.9619	1748.63	31.1254	0	0.0168	27.2117	0.0244	0.0178	27.5099	0.0158	0.0797	0.0157	-0.6297	4.6e-19	1.74e-21	0	1.05e-05	0.4555	1.9189	0.4889	1.6582	-0.0683166	0.157219	1	1	-0.0108397	-0.0561798
Tmem55b	28.0973	384.292	2.9064	2.05e-13	27.8905	518.124	4.1532	7.62e-12	0.0076	26.1697	0.0682	0.008	26.4526	0.0511	0.0866	0.0155	-0.4164	0	5.14e-08	0	8.78e-06	0.1977	3.1012	0.2118	2.7898	-0.0665722	0.111621	1	1	-0.0106946	-0.05
Tomm5	27.445	603.313	8.4774	0	28.2092	444.604	6.7098	0	0.014	26.2264	0.0438	0.0151	26.5084	0.0597	0.1069	0.0154	0.4485	0	0.000111	0	8.95e-05	0.3658	2.1664	0.3988	1.8901	-0.0827482	0.146183	1	1	-0.0106381	-0.0728477
Cct4	27.7328	850.138	15.2691	0	27.6035	1690.49	38.8936	0	0.018	26.8451	0.0316	0.0229	27.1337	0.0162	0.3493	0.0154	-0.9632	0	2.04e-07	0	5.76e-13	0.4819	1.8141	0.6186	1.4301	-0.220983	0.268513	1	1	-0.0106362	-0.213974
Bet1	29.1481	1519.62	9.8743	4.22e-11	29.2576	2331.26	21.5813	6.52e-17	0.0065	28.5818	0.0188	0.0092	28.879	0.0125	0.5086	0.0149	-0.5971	0	3.38e-12	0	8.24e-07	0.1851	3.1166	0.2664	2.3587	-0.30518	0.321321	1	1	-0.0102912	-0.293478
Hoxa7	29.5468	4109.3	27.4498	1.58e-11	30.3802	1192.27	9.7384	2.21e-12	0.0067	29.3186	0.0072	0.0082	29.6049	0.0249	0.2913	0.014	1.7963	0	1.88e-09	0	2.28e-05	0.1971	3.0808	0.2419	2.5528	-0.1852	0.206832	1	1	-0.0096707	-0.182927
Cstb	28.4615	380.828	8.9756	0	27.6835	754.19	21.5657	0	0.0236	26.4638	0.0698	0.0285	26.6851	0.0356	0.2772	0.012	-0.972	0	6.19e-09	0	1.08e-11	0.6231	1.5813	0.7607	1.2893	-0.180886	0.226479	1	1	-0.00829302	-0.17193
Csgalnact2	29.6792	1140.65	7.2741	1.86e-09	30.0561	987.189	6.7641	9.57e-09	0.0064	28.915	0.0254	0.0069	29.1452	0.0295	0.1113	0.0114	0.2115	0	1.11e-26	0	1.26e-05	0.1834	3.0709	0.1984	2.7284	-0.0756048	0.125531	1	1	-0.00789838	-0.0724638
Trappc3	28.2679	705.42	7.1871	1.28e-23	28.9991	483.962	6.1862	1.5e-23	0.0102	27.1527	0.0385	0.0128	27.3336	0.0565	0.3215	0.0096	0.5551	0	0.00946	0	7.64e-07	0.276	2.5672	0.3477	2.0343	-0.206212	0.261957	1	1	-0.00661823	-0.203125
Chmp2a	27.7076	1536.67	46.513	0	27.9002	1457.81	52.1822	0	0.0302	27.1883	0.0178	0.0357	27.3578	0.0188	0.245	0.009	0.0803	0	8.41e-15	2.34e-11	3.27e-16	0.8138	1.34	0.9743	1.0667	-0.164734	0.256211	1	1	-0.00619567	-0.154062
Lamtor2	26.7997	785.986	24.8073	0	27.2174	624.313	22.032	0	0.0316	25.8969	0.033	0.0353	26.0558	0.0418	0.1621	0.0088	0.3411	0	6.37e-09	0	4.55e-10	0.8142	1.3254	0.9132	1.1014	-0.10841	0.203378	1	1	-0.00609845	-0.104816
Psmb4	26.8577	787.855	18.5996	0	29.2575	243.484	5.9326	0	0.0236	25.9577	0.0332	0.0244	26.1042	0.1072	0.0501	0.0081	1.6935	3.37e-20	0.00227	0	5.37e-06	0.6132	1.6114	0.6352	1.419	-0.0346348	0.135588	1	1	-0.00561212	-0.0327869
Ppig	29.0267	496.111	7.5971	0	30.4025	290.797	5.1249	0	0.0153	27.4033	0.0552	0.0177	27.5056	0.0945	0.2033	0.0054	0.7754	0	0.000429	0	8.3e-07	0.4173	2.0081	0.4831	1.6732	-0.136204	0.200155	1	1	-0.00371924	-0.135593
Nutf2	29.6484	591.791	12.2369	0	29.3048	843.58	10.8068	1.18e-22	0.0207	28.2198	0.0476	0.0128	28.3083	0.0336	-0.6943	0.0045	-0.5058	0	1.27e-06	0	0	0.5833	1.5789	0.3627	1.8955	0.608216	-0.167027	1	1	-0.00312629	0.617187
Ssbp2	30.9352	932.702	6.534	5.91e-16	30.3073	3321.64	23.696	1.35e-11	0.007	29.9265	0.0323	0.0071	30.0117	0.0092	0.0198	0.0041	-1.8148	5.88e-07	3.41e-12	0	4.29e-06	0.2093	2.983	0.2132	2.7727	-0.0182927	0.0758466	1	1	-0.00283889	-0.0140845
1110004F10Rik	28.7024	1509.33	36.1898	0	29.2179	834.574	18.8484	0	0.0239	28.1449	0.0187	0.0226	28.2169	0.0338	-0.0837	0.0037	0.8543	0	2.17e-06	0	6e-06	0.6728	1.4834	0.636	1.3943	0.0578616	0.063903	1	1	-0.00255166	0.0575221
Klf13	28.0429	1216.03	6.8509	2.69e-08	29.92	336.555	3.8132	0	0.0056	27.3866	0.0226	0.0114	27.441	0.0814	1.0184	0.0029	1.8451	0	2.42e-07	0	1.98e-11	0.1529	3.6347	0.3079	2.3469	-0.50341	0.548724	1	1	-0.00198244	-0.508772
Psmc3	28.0813	1033.88	23.6327	0	27.9999	1213.12	26.9925	0	0.0228	27.3234	0.0265	0.0223	27.3531	0.0225	-0.0343	0.0016	-0.2342	7.59e-13	0.00819	0	3.47e-05	0.6229	1.5574	0.6091	1.4399	0.0226564	0.0816029	1	1	-0.0010858	0.0224215
Rfc2	29.141	430.988	7.2373	0	28.4527	678.667	12.1101	0	0.0168	27.2745	0.0637	0.0178	27.278	0.0404	0.0862	0.0002	-0.6567	6.84e-24	0	0	6.67e-05	0.456	1.9008	0.4839	1.6717	-0.0576565	0.137046	1	1	-0.000128309	-0.0561798
Psmc6	28.2009	366.896	6.4759	0	27.0547	792.192	17.1608	0	0.0176	26.1609	0.0715	0.0217	26.1516	0.033	0.297	-0.0005	-1.1142	0	3.45e-10	0	1.59e-10	0.4593	1.8562	0.5648	1.4866	-0.186792	0.248621	1	1	0.000355619	-0.18894
Cox7a2	29.3004	631.235	25.221	0	29.7291	473.678	19.2067	0	0.04	27.9782	0.0443	0.0409	27.9565	0.059	0.0306	-0.0011	0.4133	7.28e-08	7.94e-05	0	1.06e-07	1.1141	1.031	1.1343	0.9191	-0.0178083	0.12175	1	1	0.000776206	-0.0220049
Mrpl13	28.105	1235.35	10.0702	2.24e-18	28.0586	1246.24	8.849	7.27e-08	0.0082	27.471	0.0223	0.0071	27.4372	0.022	-0.1987	-0.0018	-0.0137	0	1.03e-09	0.00888	5.23e-07	0.2242	2.8394	0.1949	2.7266	0.150334	0.0413702	1	1	0.0012319	0.15493
Pnkp	27.7488	768.222	16.57	0	27.5408	872.957	26.4004	0	0.0216	26.7554	0.0348	0.0302	26.6917	0.0306	0.4858	-0.0034	-0.1855	0	0	0	3.75e-27	0.5731	1.6642	0.8084	1.2239	-0.291069	0.359752	1	1	0.00238651	-0.284768
1110008P14Rik	28.4607	2831.8	27.7568	1.26e-26	29.4285	608.882	8.4281	0	0.0098	28.1524	0.01	0.0138	28.0562	0.0461	0.4981	-0.0049	2.211	0	3.93e-13	0	3.71e-08	0.2736	2.5979	0.3877	2.0146	-0.2943	0.289536	1	1	0.00342883	-0.289855
Slc25a17	29.661	1211.29	11.472	1.17e-16	29.7998	899.953	10.6734	1.97e-18	0.0095	28.9287	0.024	0.0119	28.8216	0.032	0.3286	-0.0053	0.4181	0	4.52e-10	0	3.75e-06	0.2721	2.5156	0.341	2.0403	-0.202053	0.232956	1	1	0.00371596	-0.201681
Serinc1	28.5004	1935.13	11.6335	4.14e-11	28.5422	1361	10.7644	2.75e-14	0.006	28.0679	0.0146	0.0079	27.9431	0.0206	0.3984	-0.0064	0.494	0	1.99e-17	0	1.22e-05	0.168	3.3441	0.2209	2.6726	-0.239475	0.251253	1	1	0.00446622	-0.240506
Syncrip	28.7623	1072.12	7.9556	1.84e-14	28.4023	1461.31	16.105	2.21e-18	0.0074	27.996	0.0261	0.011	27.8532	0.0191	0.5701	-0.0074	-0.4538	0	4.79e-06	0	9.27e-08	0.208	2.8573	0.3081	2.1623	-0.324895	0.321417	1	1	0.00512688	-0.327273
Emc10	26.4891	487.191	9.7463	0	25.582	1039.61	24.31	0	0.02	25.0837	0.0516	0.0234	24.95	0.0241	0.2271	-0.0077	-1.102	0	1.04e-21	0	6.4e-09	0.4953	1.8046	0.5819	1.4775	-0.148823	0.221387	1	1	0.00535872	-0.145299
Actl6a	28.9201	989.508	10.2764	7.89e-18	28.3194	2001.52	19.7321	9.02e-14	0.0104	28.0812	0.0284	0.0099	27.9167	0.014	-0.0752	-0.0085	-1.025	0	5.05e-24	0	1.49e-05	0.2916	2.3826	0.2763	2.2469	0.0553746	0.0603943	1	1	0.00589253	0.0505051
Ergic2	30.892	2266.91	16.0014	1.9e-14	30.6848	2416.71	18.915	1.22e-11	0.007	30.4556	0.0136	0.0078	30.2767	0.0126	0.1512	-0.0085	-0.1048	0	0.00047	2.24e-21	3.42e-05	0.2141	2.8618	0.2368	2.4903	-0.0958615	0.149179	1	1	0.00590883	-0.102564
Xpc	26.1344	806.462	29.1596	0	27.4098	306.473	11.4886	0	0.0362	25.2983	0.0314	0.0375	25.1423	0.0821	0.0536	-0.0089	1.3855	3.68e-22	4.31e-06	0	0.000176	0.9096	1.2653	0.94	1.144	-0.0323404	0.106031	1	1	0.00620468	-0.0346667
Mrps10	30.1616	928.77	8.538	5.17e-19	29.4405	1937.71	18.527	2.48e-16	0.0093	29.1833	0.0313	0.0095	28.9856	0.015	0.042	-0.0098	-1.0602	4.79e-18	2.78e-19	0	5.69e-05	0.2661	2.5392	0.277	2.2826	-0.0393502	0.112416	1	1	0.00682063	-0.0210526
Ptges3	31.6431	3093.54	23.4748	3.11e-15	31.5619	2202.04	28.7735	0	0.0076	31.31	0.0102	0.0131	31.0953	0.0141	0.7864	-0.0099	0.4767	0	8.28e-19	0	9.59e-17	0.2379	2.6427	0.4055	1.825	-0.413317	0.448055	1	1	0.00690458	-0.419847
Tpgs1	30.4644	1118.39	8.669	6.68e-15	30.2228	1104.9	11.7277	4.18e-21	0.0078	29.6399	0.0265	0.0106	29.4082	0.0267	0.4502	-0.0113	0.0105	0	3.01e-18	8.22e-12	9.18e-07	0.2298	2.8462	0.3129	2.2157	-0.26558	0.28456	1	1	0.00787875	-0.264151
Snrpe	30.6362	1474.91	30.5269	0	30.3591	1496.6	30.8318	0	0.0206	29.9728	0.0205	0.0206	29.7311	0.0199	0.0003	-0.0117	-0.0427	0.000404	1.24e-06	7.05e-13	0.000352	0.6119	1.5589	0.6091	1.4556	0.00459695	0.0709673	1	1	0.00812953	0
Vdac3	29.5192	1133.4	30.096	0	29.2853	1108.07	27.6341	0	0.0266	28.7533	0.0253	0.025	28.513	0.0257	-0.0904	-0.0121	0.0219	1.43e-25	8.94e-06	9.42e-09	1.33e-06	0.7606	1.3425	0.7099	1.2948	0.0714185	0.0368397	1	1	0.00842773	0.064
Snx4	28.1835	755.629	7.4697	9.03e-20	28.6465	449.231	6.2369	2.1e-26	0.0099	27.1541	0.0359	0.0139	26.8998	0.06	0.4894	-0.0136	0.7382	0	8.05e-08	0	6.39e-09	0.2678	2.5142	0.3714	1.9303	-0.278945	0.302492	1	1	0.0094536	-0.28777
Trappc1	27.7577	1327.68	12.391	1.01e-21	28.1199	630.759	6.3887	3.07e-16	0.0093	27.1787	0.0205	0.0102	26.9023	0.0426	0.1292	-0.0147	1.0565	0	0	0	4.44e-05	0.2536	2.6883	0.2719	2.3856	-0.0673042	0.126886	1	1	0.0102742	-0.0882353
Psme3	31.1746	3911.23	25.353	3.86e-12	30.8971	3332.88	22.1322	1.11e-09	0.0065	30.9147	0.008	0.0066	30.5995	0.0092	0.0342	-0.0148	0.218	4.86e-06	0.000161	0	1.15e-05	0.2	2.9303	0.2037	2.6402	-0.018164	0.109878	1	1	0.0103008	-0.0151515
Dnajb1	28.9218	1621.98	40.9658	0	28.9784	962.794	20.5265	0	0.0252	28.3984	0.0176	0.0214	28.1024	0.0292	-0.2389	-0.0151	0.7282	0	0	0	1.81e-09	0.7167	1.5167	0.595	1.549	0.204538	-0.0208522	1	1	0.0105329	0.17757
Eif4a1	40.6798	2807.49	164.056	0	40.228	2808.98	163.783	0	0.0587	40.0719	0.0142	0.0584	39.632	0.0141	-0.0064	-0.0159	-0.0148	2.36e-07	2.96e-11	7.31e-05	5.23e-06	2.3303	0.5549	2.3058	0.5064	0.0106254	0.0957741	1	1	0.0110996	0.00513699
Gtf2a2	28.7407	3066	32.751	9.27e-24	28.843	1161.14	11.3709	1.37e-14	0.0107	28.4598	0.0094	0.0098	28.1207	0.0243	-0.122	-0.0173	1.3716	0	1.76e-12	0	5.27e-06	0.3041	2.4313	0.2742	2.3216	0.109044	0.0472519	1	1	0.0120587	0.0918367
Capza1	28.5973	1057.69	21.2488	0	28.3853	883.289	18.4594	0	0.0201	27.8261	0.0265	0.0209	27.4907	0.0311	0.059	-0.0175	0.2349	0	0	0	0.000351	0.5563	1.6416	0.574	1.4967	-0.0308362	0.096813	1	1	0.0122005	-0.0382775
Cetn3	28.2374	431.667	13.0978	0	27.3879	562.518	13.9867	0	0.0305	26.4812	0.0612	0.0249	26.0973	0.0463	-0.2895	-0.0211	-0.4021	0	3.55e-05	0	3.25e-14	0.7999	1.3409	0.6475	1.3977	0.235367	-0.0406382	1	1	0.0147103	0.2249
Ufm1	29.9444	2967.44	22.5417	1.17e-17	30.46	702.076	6.073	7.79e-15	0.0076	29.63	0.01	0.0087	29.1704	0.0417	0.1904	-0.0226	2.054	0	2.05e-08	0	4e-05	0.2253	2.8195	0.2518	2.4409	-0.105242	0.155107	1	1	0.0157557	-0.126437
Terf1	30.1839	763.692	5.5217	2.76e-13	29.4761	946.865	5.1111	0.000157	0.0072	29.0151	0.038	0.0054	28.5635	0.0303	-0.4224	-0.0226	-0.3305	0	1.46e-07	0	3.52e-10	0.2097	2.925	0.1529	3.1119	0.371485	-0.0600598	1	1	0.0158104	0.333333
Sbds	28.6587	4113.08	31.0023	6.64e-13	28.9087	904.983	6.7154	3.24e-13	0.0075	28.45	0.007	0.0074	28.0069	0.0309	-0.0153	-0.0227	2.1479	9.04e-05	0.000157	0	3.1e-06	0.2157	2.9	0.2076	2.7244	0.0390173	0.0644546	1	1	0.0158211	0.0135135
Pcif1	26.6165	426.666	7.9673	0	26.3014	391.921	5.3767	6.08e-22	0.0187	25.0357	0.0586	0.0137	24.6399	0.0629	-0.4484	-0.023	0.101	0	3.61e-11	0	1.32e-13	0.4656	1.8992	0.3379	2.0924	0.377922	-0.0923342	1	1	0.0160634	0.364964
Fam195b	26.9804	244.491	5.9799	0	25.1665	470.948	11.9981	0	0.0244	24.2723	0.0995	0.0255	23.8746	0.0508	0.0583	-0.0238	-0.9689	9.79e-27	9.64e-11	0	4.09e-05	0.5906	1.6529	0.6055	1.4705	-0.0246078	0.124039	1	1	0.0166579	-0.0431373
Calm2	49.6003	5050.5	294.194	0	48.7545	4752.31	241.865	0	0.0584	49.087	0.0097	0.0514	48.2246	0.0101	-0.1852	-0.0256	0.0606	0	2.98e-05	2.92e-27	0	2.8565	0.3962	2.4577	0.4382	0.162266	-0.0958466	1	1	0.017883	0.136187
Casp8	29.7676	1675.15	15.1158	7.72e-21	29.2589	1535.13	13.5561	2.05e-16	0.009	29.2268	0.0174	0.0088	28.6937	0.0187	-0.0309	-0.0266	0.0987	0.0002	9.57e-06	0	1.08e-05	0.2627	2.5863	0.2527	2.4189	0.0395726	0.069205	1	1	0.018579	0.0227273
Vamp4	27.5241	1691.42	15.9286	1.65e-24	28.159	483.97	3.9674	9.44e-12	0.0094	27.0697	0.0161	0.0082	26.5726	0.055	-0.1992	-0.0267	1.7702	0	3.13e-27	0	1.81e-08	0.2553	2.6949	0.215	2.7589	0.187442	-0.0231977	1	1	0.0187072	0.146341
Psph	29.1132	1998.48	12.4448	1.48e-10	29.0064	985.986	7.0205	2.49e-09	0.0062	28.6861	0.0144	0.0071	28.1555	0.0286	0.1899	-0.0269	0.9952	0	8.07e-09	0	1.92e-05	0.1791	3.1384	0.1989	2.6745	-0.0995475	0.173453	1	1	0.0188453	-0.126761
Cenpa	25.9539	953.953	21.3176	0	25.6787	719.067	11.8743	0	0.0223	25.2557	0.0266	0.0165	24.7799	0.0345	-0.4348	-0.0274	0.3745	0	5e-11	0	9.31e-17	0.5644	1.8428	0.4078	2.1428	0.384012	-0.140004	1	1	0.019201	0.351515
Mrps23	31.4672	534.292	4.0946	4.79e-12	30.2098	818.489	6.9815	1.4e-17	0.0077	29.6996	0.0556	0.0085	29.1048	0.0356	0.1568	-0.0292	-0.6459	0	9.79e-09	0	3.66e-05	0.2269	2.7942	0.2459	2.4792	-0.0772672	0.127057	1	1	0.0204365	-0.0941176
Abt1	26.7793	931.677	7.2763	9.89e-14	27.2296	405.455	3.0182	2.27e-09	0.0078	26.029	0.028	0.0074	25.4946	0.063	-0.0702	-0.0299	1.1713	0	0	0	9.77e-07	0.2034	3.0262	0.1885	2.8618	0.0790451	0.0574464	1	1	0.0209613	0.0540541
Mtpn	26.9369	1254.81	9.3841	5.14e-13	26.5319	963.388	9.3992	1.31e-11	0.0075	26.3535	0.0211	0.0098	25.8106	0.0269	0.3882	-0.03	0.3475	0	0	0	1.8e-05	0.1962	2.995	0.2518	2.4497	-0.22081	0.222599	1	1	0.021034	-0.234694
Cops8	30.9418	914.513	9.3698	1.56e-26	29.6988	2248.35	25.1742	1.37e-18	0.0103	29.9135	0.0327	0.0112	29.2963	0.013	0.1302	-0.0301	-1.3297	0	3.68e-07	0	7.71e-05	0.3051	2.3793	0.3273	2.0832	-0.0678277	0.142137	1	1	0.0210675	-0.0803571
Mrps16	29.1124	1142.44	15.3532	0	28.4594	1022.64	15.8594	0	0.0135	28.3698	0.0248	0.0155	27.6784	0.0271	0.2051	-0.0356	0.125	0	0	0	2.84e-05	0.3814	2.0778	0.4291	1.7796	-0.111163	0.167566	1	1	0.0249798	-0.129032
Arfgap2	30.742	1315.18	8.5729	1.88e-14	29.6647	2303.63	16.7693	1.96e-11	0.0065	30.02	0.0228	0.0073	29.2713	0.0127	0.1551	-0.0364	-0.8404	0	7.61e-24	0	1.93e-05	0.1948	3.0602	0.2138	2.6573	-0.0888681	0.15162	1	1	0.025578	-0.109589
Mrpl12	25.9297	735.715	11.4074	0	25.4834	587.804	9.1603	1.26e-23	0.0155	25.0329	0.034	0.0156	24.4047	0.0416	0.0061	-0.0367	0.2883	0.00357	2.6e-13	0	0.000107	0.3868	2.0904	0.3784	1.9306	0.0221987	0.0827722	1	1	0.0257409	-0.00641026
Cenpw	30.0859	2563.66	15.8556	2.66e-10	29.3695	2025.06	12.3906	1.11e-06	0.0062	29.7137	0.0117	0.0061	28.9342	0.0143	-0.0113	-0.0384	0.2949	0.000715	3.08e-08	0	1.94e-06	0.1836	2.9779	0.1772	2.7946	0.0361174	0.0655908	1	1	0.0269404	0.0163934
Park7	28.1299	1800.03	69.2601	0	27.4516	1512.5	57.3863	0	0.0385	27.6859	0.0154	0.0379	26.9564	0.0179	-0.0223	-0.0385	0.2163	1.12e-09	0	0	2.22e-09	1.0666	1.0964	1.0234	1.0164	0.0422122	0.0787092	1	1	0.0270622	0.0158311
Mfap1b	29.7166	2966.32	18.5104	7.2e-11	30.2486	534.917	3.5687	4e-08	0.0062	29.4052	0.0099	0.0067	28.6157	0.0535	0.0965	-0.0393	2.4318	0	2.63e-19	0	5.58e-06	0.1834	3.1259	0.1908	2.8209	-0.0387841	0.108122	1	1	0.0275897	-0.0746269
Cdkn2c	28.1086	536.5	11.6064	0	26.8138	792.003	31.2523	0	0.0216	26.6877	0.0498	0.0394	25.915	0.0328	0.8665	-0.0424	-0.6039	0	1.07e-15	0	0	0.5738	1.6931	1.0179	1.1118	-0.43629	0.522846	1	1	0.0298167	-0.451777
Sdf2	29.1081	1104.19	6.5422	2.77e-10	28.1649	1209.99	10.0546	1.07e-13	0.0059	28.3564	0.0257	0.0083	27.5157	0.0228	0.4874	-0.0434	-0.1762	0	0	0	9.54e-06	0.1681	3.3732	0.2289	2.6395	-0.265618	0.277969	1	1	0.0305535	-0.289157
Arpp19	29.3551	2409.1	82.3287	0	29.2025	771.215	25.3932	0	0.0341	28.9912	0.0121	0.033	28.1195	0.0364	-0.0481	-0.044	1.5938	2.79e-19	0	0	6.5e-09	0.992	1.1225	0.9245	1.0801	0.0730124	0.0392556	1	1	0.0309998	0.0333333
Mrps12	27.4722	885.256	12.057	0	28.0546	327.784	4.7179	4.73e-23	0.0136	26.6353	0.0302	0.0144	25.8128	0.0791	0.0778	-0.0453	1.3891	0	2.2e-27	0	0.000144	0.3621	2.16	0.3699	1.9621	-0.0210868	0.100861	1	1	0.031864	-0.0555556
Lsm2	31.1794	494.544	8.0283	0	29.3397	902.047	11.7142	2.55e-26	0.0163	29.3126	0.0593	0.013	28.3989	0.0315	-0.3244	-0.0457	-0.911	0	4.13e-15	0	1.97e-11	0.4753	1.8433	0.3671	1.9696	0.294743	-0.0641247	1	1	0.0321738	0.253846
Adk	30.9075	1237.17	8.1264	3.6e-11	30.0989	983.713	5.7461	2.96e-06	0.0066	30.1312	0.0244	0.0058	29.1908	0.0297	-0.1672	-0.0457	0.2829	0	2.76e-20	0	7.46e-08	0.197	2.8957	0.1706	2.8998	0.154748	-0.00141389	1	1	0.0322156	0.137931
Snx1	27.391	1156.9	8.4713	1.49e-09	27.177	541.578	6.2107	4.88e-20	0.0073	26.7482	0.0231	0.0115	25.8661	0.0477	0.6437	-0.0484	1.0462	0	1.19e-17	0	2.07e-07	0.196	3.0433	0.2953	2.2863	-0.336268	0.331103	1	1	0.0341026	-0.365217
Alas1	26.2625	616.677	20.7458	0	26.0786	366.617	15.7361	0	0.0337	25.1817	0.0409	0.0429	24.3327	0.0664	0.3511	-0.0495	0.7007	0	2.53e-21	0	9.97e-18	0.8482	1.2902	1.043	1.0165	-0.186769	0.269257	1	1	0.0348913	-0.214452
Ckap4	28.3717	781.518	7.4178	4.98e-18	27.3744	777.61	12.1636	0	0.0095	27.3629	0.035	0.0157	26.4277	0.034	0.723	-0.0502	-0.0438	0	5.22e-16	1.2e-17	9.35e-12	0.2594	2.6174	0.4122	1.9246	-0.370694	0.359971	1	1	0.0353871	-0.394904
Ict1	29.9499	327.174	3.5332	1.25e-20	28.0461	464.746	6.256	1.4e-24	0.0108	27.4067	0.084	0.0134	26.4258	0.057	0.3181	-0.0526	-0.56	0	1.68e-13	0	8.2e-06	0.2938	2.4563	0.3526	2.0217	-0.166761	0.214968	1	1	0.037119	-0.19403
Pcbp1	27.7273	447.691	12.6975	0	26.0259	756.805	22.0307	0	0.0284	26.0936	0.0586	0.0291	25.147	0.0333	0.0367	-0.0533	-0.8152	3.12e-27	0	0	2.1e-05	0.7392	1.3817	0.7315	1.2841	0.0105263	0.0760065	1	1	0.0376427	-0.024055
Eif2s1	29.9103	1550.77	22.5368	0	29.6677	593.378	9.2432	0	0.0145	29.3285	0.0189	0.0156	28.2347	0.0475	0.104	-0.0548	1.3288	0	1.9e-09	0	0.000177	0.4256	1.9387	0.438	1.7562	-0.0283105	0.103918	1	1	0.0387396	-0.0705128
Tmx1	26.8727	861.27	22.5183	0	26.6164	442.279	11.5135	0	0.0261	26.043	0.0303	0.0259	25.0655	0.0571	-0.0116	-0.0552	0.9157	1.66e-08	1.11e-26	0	5.93e-06	0.6809	1.4527	0.6476	1.3737	0.0514206	0.0575089	1	1	0.0389978	0.00772201
Tra2a	28.8431	3036.53	29.5139	2.78e-23	28.1928	1088.02	13.8558	5e-25	0.0097	28.564	0.0094	0.0128	27.468	0.0252	0.3932	-0.0564	1.4206	0	9.36e-21	0	5.72e-06	0.2785	2.5241	0.349	2.0668	-0.202006	0.22126	1	1	0.039901	-0.242188
Rpe	29.4949	1169.91	6.1057	6.42e-09	28.2286	1303.03	11.6133	1.58e-12	0.0052	28.7528	0.0248	0.0089	27.6137	0.0212	0.7762	-0.0583	-0.2249	0	1.5e-25	0	6.51e-08	0.1492	3.4457	0.2456	2.4357	-0.392508	0.414665	1	1	0.0412513	-0.41573
Hmbs	28.9737	910.511	7.9416	3.21e-15	27.5678	1169.59	10.2968	8.45e-10	0.0087	28.058	0.0308	0.0088	26.9162	0.023	0.0152	-0.0599	-0.4207	8.61e-05	6.53e-19	0	1.23e-05	0.244	2.6391	0.2372	2.4345	0.0286678	0.0840419	1	1	0.0424205	-0.0113636
Atp6v1d	27.6555	469.536	5.4641	0	26.2563	540.83	8.108	9.96e-26	0.0117	26.0995	0.0555	0.015	25.0268	0.0463	0.36	-0.0606	-0.2617	0	2.03e-16	0	4.39e-06	0.3032	2.4114	0.3752	1.9874	-0.191898	0.213344	1	1	0.0428621	-0.22
Hnrnpul1	29.9418	1311.88	9.582	6.74e-11	28.3797	2459.46	22.2932	5.73e-12	0.0073	29.2638	0.0223	0.0091	28.0388	0.0114	0.3109	-0.0617	-0.9675	0	2.5e-22	0	2.94e-05	0.2137	2.8433	0.2546	2.3663	-0.160644	0.201581	1	1	0.0436895	-0.197802
Rpl27a	40.1498	1954.19	108.885	0	38.5242	1752.1	109.585	0	0.0558	39.3254	0.0201	0.063	37.6788	0.0215	0.1749	-0.0617	0.0961	0	7.85e-15	0	5.15e-08	2.1938	0.5663	2.3607	0.48	-0.0706994	0.179792	1	1	0.043701	-0.114286
Mospd1	29.8079	1050.62	7.1408	1.12e-14	28.6611	868.716	7.5067	6.18e-18	0.0068	28.9671	0.0275	0.0086	27.7321	0.032	0.3348	-0.0629	0.2182	0	1.84e-22	0	2.49e-05	0.1964	3.0438	0.2393	2.5272	-0.179273	0.204416	1	1	0.0445332	-0.209302
Twf2	27.5487	346.853	5.5777	0	25.7814	463.916	11.5935	0	0.0161	25.5158	0.0736	0.025	24.4175	0.0526	0.6363	-0.0635	-0.483	0	0	0	8.32e-22	0.4099	2.02	0.6092	1.4638	-0.32715	0.37997	1	1	0.04498	-0.356
Myl12b	32.8521	2527.95	151.196	0	32.6169	636.329	39.1035	0	0.0598	32.4153	0.0128	0.0614	31.0057	0.0488	0.038	-0.0641	1.9281	1.84e-10	1.96e-16	0	1.04e-09	1.9339	0.6454	1.8994	0.5797	0.0181636	0.113334	1	1	0.0454626	-0.0260586
Rnpep	29.4735	673.733	5.2378	3.48e-13	28.5658	495.561	4.9462	4.55e-18	0.0078	28.227	0.0419	0.01	26.9965	0.0545	0.3635	-0.0643	0.3783	0	1.28e-14	0	1.83e-05	0.2195	2.8597	0.2698	2.3475	-0.186434	0.21819	1	1	0.04558	-0.22
Elovl1	29.3322	1716.23	19.4792	5.34e-24	28.1789	1264.58	14.3365	2.18e-21	0.0113	28.8169	0.0169	0.0113	27.5523	0.0218	0.0018	-0.0647	0.3726	1.57e-20	0	0	3.83e-05	0.3244	2.3223	0.312	2.1479	0.0397436	0.0811956	1	1	0.0458982	0
Ndufs4	27.3542	932.147	17.4615	0	26.3578	680.378	14.2129	0	0.0187	26.5477	0.0287	0.0209	25.3642	0.0373	0.1646	-0.0658	0.3757	0	0	0	9.23e-05	0.493	1.8076	0.5291	1.602	-0.0682291	0.12834	1	1	0.0466603	-0.105263
Mrto4	29.9106	2806.28	27.1328	3.86e-22	29.1841	890.571	8.5583	1.55e-15	0.0097	29.579	0.0106	0.0096	28.2435	0.0318	-0.0066	-0.0667	1.5833	0.0394	0	0	9.5e-06	0.2866	2.431	0.2705	2.3131	0.0595194	0.0509706	1	1	0.0472852	0.0104167
Napa	28.8862	869.014	12.5754	0	27.2982	1194.42	18.0657	8.01e-24	0.0144	27.9312	0.0322	0.0151	26.6698	0.0224	0.0652	-0.0667	-0.5251	3.74e-18	3.13e-20	0	0.000134	0.3998	2.0429	0.4028	1.8667	-0.00744786	0.0943912	1	1	0.0472969	-0.0463576
Zfp787	29.4198	1375.96	14.0341	1.6e-21	28.2701	1009.87	8.0271	1.16e-13	0.0102	28.7939	0.021	0.0079	27.4851	0.0273	-0.3601	-0.0671	0.3823	0	0	0	9.07e-11	0.2941	2.4706	0.2182	2.6737	0.347846	-0.0759621	1	1	0.0476185	0.291139
Gtpbp4	27.8669	2540.4	13.3383	1.04e-09	27.3347	692.283	5.6041	1.17e-09	0.0052	27.5488	0.0109	0.0081	26.2823	0.038	0.6299	-0.0679	1.796	0	5.21e-25	0	5.04e-06	0.1443	3.496	0.2121	2.6629	-0.319661	0.312854	1	1	0.0481883	-0.358025
Wdr61	27.361	3181.55	37.6534	0	26.6797	860.387	10.2698	9.71e-17	0.0118	27.1222	0.0086	0.0119	25.8687	0.0303	0.0125	-0.0683	1.8177	1.05e-07	0	0	3.93e-05	0.323	2.2985	0.3095	2.1344	0.0436187	0.0768834	1	1	0.0484562	-0.00840336
Mtch2	29.3481	706.687	8.0115	2.53e-27	27.7741	836.69	11.1705	1.65e-21	0.0114	28.1675	0.0399	0.0134	26.8621	0.0321	0.2441	-0.0685	-0.3132	0	0	0	3.99e-05	0.3185	2.3185	0.3587	1.9824	-0.112071	0.169542	1	1	0.0485963	-0.149254
Atp6v1a	29.4477	395.473	2.5595	9.09e-12	26.9806	840.266	9.1948	1.42e-18	0.0065	27.391	0.0694	0.0109	26.1199	0.0311	0.7571	-0.0686	-1.155	0	0	0	9.81e-09	0.1768	3.1743	0.2841	2.2681	-0.377684	0.399541	1	1	0.048664	-0.40367
Gm16286	27.3289	724.148	14.0555	0	25.9705	740.842	15.3465	0	0.0194	26.3115	0.0365	0.0208	25.0795	0.0339	0.102	-0.0692	-0.1091	0	0	0	0.000229	0.5089	1.7503	0.5204	1.6018	-0.0220984	0.0927082	1	1	0.0491238	-0.0673077
Nme1	29.3419	1032.26	36.8769	0	27.8672	1127.73	39.0115	0	0.0358	28.516	0.0276	0.0346	27.1772	0.0241	-0.0477	-0.0694	-0.1964	8.4e-07	4.14e-24	0	7.28e-08	1.0166	1.1659	0.9382	1.1391	0.0835643	0.0235273	1	1	0.0492619	0.0346821
Utp11l	28.2696	542.74	4.2391	1.15e-11	26.6237	672.345	7.0197	2.63e-14	0.0078	26.8582	0.0495	0.0104	25.5946	0.0382	0.4157	-0.0695	-0.373	0	0	0	1.32e-05	0.2087	2.9221	0.2663	2.364	-0.216297	0.236083	1	1	0.0493698	-0.25
1110001J03Rik	30.6395	2860.55	24.7156	1.46e-20	30.6824	491.098	5.7544	5.19e-20	0.0086	30.2961	0.0106	0.0117	28.8673	0.0588	0.44	-0.0697	2.4713	0	0	0	8.3e-07	0.2605	2.5526	0.3374	2.0246	-0.227919	0.260792	1	1	0.0494954	-0.264957
Banf1	29.1736	644.034	13.4547	0	28.878	332.478	7.315	0	0.0209	27.8799	0.0435	0.022	26.5566	0.08	0.0772	-0.0702	0.8788	0	0	0	0.000249	0.5786	1.6373	0.5835	1.5098	-0.0083976	0.0844483	1	1	0.0498294	-0.05
Hmgb1	40.784	3622.68	242.82	0	39.1885	1830.65	113.714	0	0.0672	40.3052	0.0111	0.0623	38.3346	0.0209	-0.1095	-0.0723	0.912	8.3e-21	1.89e-19	0	0	2.7005	0.4715	2.3685	0.5589	0.140173	-0.156379	1	1	0.0514053	0.0786517
Stk19	29.2236	580.236	3.8731	6.48e-13	27.1643	1017.15	7.7611	4.57e-09	0.0067	27.8135	0.048	0.0076	26.4476	0.0261	0.1917	-0.0727	-0.878	0	0	0	1.48e-05	0.1857	3.1436	0.2022	2.7269	-0.0816024	0.152811	1	1	0.0516455	-0.118421
Prpf40a	29.2752	864.577	11.1626	0	27.3993	1511.91	30.1524	0	0.0129	28.2937	0.0327	0.02	26.8959	0.0178	0.628	-0.0731	-0.8801	0	2.32e-19	0	3.57e-18	0.3638	2.1558	0.536	1.5726	-0.321269	0.370851	1	1	0.0519707	-0.355
Txn1	31.8905	1839.49	59.9037	0	30.4914	1217.11	49.1481	0	0.0326	31.332	0.0171	0.0405	29.7316	0.0244	0.3148	-0.0756	0.5169	0	0	0	3.88e-14	1.0207	1.1192	1.2004	0.9058	-0.1497	0.235593	1	1	0.0538283	-0.195062
Cdk2ap2	36.7383	4155.86	220.858	0	35.8841	924.939	52.6378	0	0.053	36.3941	0.0088	0.0574	34.5088	0.0372	0.1169	-0.0767	2.0762	4.69e-24	1.34e-18	0	1.96e-07	1.928	0.6721	1.9535	0.5906	-0.0130535	0.137995	1	1	0.0546324	-0.0766551
Tiprl	27.8078	1346.8	17.7341	0	27.0524	552.358	6.9071	1.19e-21	0.0132	27.2278	0.0203	0.0125	25.7805	0.0467	-0.0695	-0.0788	1.2028	2.05e-17	0	0	4.45e-06	0.3577	2.1557	0.3213	2.1003	0.11329	0.0263772	1	1	0.0561393	0.056
Cr1l	27.1212	2174.04	22.9383	2.76e-26	26.2119	718.812	9.9683	9.51e-23	0.0106	26.7729	0.0123	0.0139	25.2792	0.0352	0.3921	-0.0828	1.5148	0	0	0	8.75e-06	0.2827	2.4891	0.3497	2.0498	-0.191593	0.214314	1	1	0.0590881	-0.23741
Ggnbp2	29.3479	2091.8	22.6001	1.33e-22	27.9511	1169.37	14.5161	4.84e-19	0.0108	28.9223	0.0138	0.0124	27.287	0.0233	0.1996	-0.084	0.7558	0	0	0	0.000104	0.3126	2.3717	0.3388	2.0974	-0.0773318	0.130781	1	1	0.0599296	-0.129032
Pdcl3	28.2258	839.793	15.533	0	27.5775	379.3	8.3784	0	0.0185	27.2697	0.0325	0.0221	25.6837	0.0678	0.2538	-0.0864	1.0623	0	0	0	3.71e-06	0.4968	1.8064	0.5658	1.5374	-0.121951	0.174971	1	1	0.0617512	-0.162896
Fkbp1a	29.6758	1550.39	36.1634	0	28.2652	910.539	20.4097	0	0.0233	29.1008	0.0188	0.0224	27.3987	0.0301	-0.0571	-0.0869	0.6811	5.07e-12	0	0	1.83e-06	0.6742	1.4974	0.6132	1.4514	0.0994781	0.0316935	1	1	0.0621234	0.0401786
Ndufs6	30.5398	2839.05	47.2093	0	29.7532	625.018	11.8996	0	0.0166	30.1995	0.0107	0.019	28.3729	0.0455	0.1978	-0.09	2.0894	0	0	0	7.44e-05	0.5029	1.7774	0.5362	1.571	-0.0621037	0.131381	1	1	0.0643783	-0.126316
Cox17	30.6836	1672.26	26.509	0	29.0575	1097.18	23.0988	0	0.0158	30.1152	0.0181	0.0211	28.2907	0.0258	0.4141	-0.0902	0.5109	0	0	0	9.45e-11	0.4754	1.7961	0.5936	1.4446	-0.199124	0.24332	1	1	0.0644912	-0.251185
Hiatl1	31.6632	3235.56	25.5684	1.27e-17	29.9464	1677.73	18.8444	5.94e-22	0.0079	31.3332	0.0097	0.0112	29.4006	0.0176	0.5064	-0.0918	0.8586	0	0	0	1.02e-06	0.2469	2.6301	0.3295	2.0872	-0.250683	0.260109	1	1	0.0657334	-0.294643
Tada1	30.265	1835.5	12.2374	4.01e-10	28.3543	1710.02	12.533	1.73e-12	0.0067	29.7601	0.0162	0.0073	27.8857	0.0163	0.1346	-0.0939	0.01	0	0	5.13e-05	1.04e-05	0.1986	2.9732	0.2041	2.6686	-0.0269476	0.114142	1	1	0.0672172	-0.0821918
Ddrgk1	29.4548	697.363	13.6405	0	27.3492	814.82	16.7812	0	0.0196	28.2371	0.0405	0.0206	26.4435	0.0325	0.0748	-0.0947	-0.3201	8.52e-27	0	0	8.37e-05	0.5491	1.7065	0.5434	1.5616	0.0104895	0.0927894	1	1	0.0678276	-0.0485437
Litaf	29.1565	787.188	6.8313	6.29e-21	28.1849	397.896	4.8953	4.03e-21	0.0087	28.095	0.0357	0.0123	26.305	0.066	0.5083	-0.095	0.8863	0	0	0	2.86e-06	0.2425	2.7817	0.3224	2.2113	-0.247829	0.257948	1	1	0.0680479	-0.292683
Wac	31.0434	1918.27	13.4783	5.74e-12	29.7082	762.501	5.2282	5.76e-09	0.007	30.5347	0.0159	0.0069	28.5756	0.0375	-0.0367	-0.0957	1.2364	1.21e-09	0	0	5.14e-07	0.2145	2.9065	0.1941	2.8199	0.1051	0.0307103	1	1	0.0685585	0.0144928
Smim12	31.1439	589.744	3.4142	3.81e-09	28.9019	649.493	5.5861	1.06e-13	0.0058	29.5504	0.05	0.0086	27.6488	0.0426	0.5669	-0.096	-0.2318	0	0	0	6.27e-06	0.1697	3.231	0.2364	2.5227	-0.282149	0.280771	1	1	0.0687769	-0.325581
Nap1l4	31.4293	689.309	5.1055	8.41e-12	28.6698	1417.95	18.8168	0	0.0074	30.028	0.0434	0.0133	28.0828	0.0198	0.8336	-0.0966	-1.1308	0	5.7e-21	0	1.76e-14	0.2202	2.7804	0.3713	1.9242	-0.406949	0.444964	1	1	0.0692666	-0.443609
Was	30.8321	534.812	4.5397	8.41e-18	29.7166	328.028	4.2303	5.3e-21	0.0085	29.1346	0.0544	0.0129	27.2333	0.0829	0.6028	-0.0974	0.6078	0	0	0	3.17e-08	0.2472	2.6538	0.3509	2.0326	-0.295526	0.305618	1	1	0.0698153	-0.341085
Cept1	31.0147	619.048	2.951	2.66e-08	28.1122	1568.45	13.9838	8.27e-14	0.0048	29.5203	0.0476	0.0089	27.5864	0.0176	0.898	-0.0978	-1.4335	0	4.9e-25	0	1.37e-07	0.1411	3.621	0.2427	2.5446	-0.418624	0.423013	1	1	0.0701034	-0.460674
Sdha	28.9551	956.363	8.5175	1.8e-21	26.8363	1205.77	15.0321	2.71e-20	0.0089	28.0888	0.0294	0.0125	26.2383	0.0218	0.4852	-0.0983	-0.433	0	0	0	9.98e-07	0.25	2.6133	0.3261	2.0699	-0.233364	0.262525	1	1	0.0705267	-0.288
Immp1l	27.7708	2177.05	16.7705	2.45e-13	26.2975	949.436	7.9533	4.4e-13	0.0077	27.4042	0.0127	0.0084	25.5698	0.027	0.1224	-0.1	1.0913	0	0	0	6.12e-06	0.211	2.9178	0.2125	2.6761	-0.00705882	0.090318	1	1	0.0717409	-0.0833333
Fbxw2	30.4918	2250.47	15.7282	1.31e-16	30.1472	405.206	3.1632	6.17e-12	0.007	30.072	0.0134	0.0078	28.0402	0.0691	0.1656	-0.1009	2.367	0	0	0	1.21e-05	0.2103	2.9287	0.2183	2.6564	-0.0366468	0.102507	1	1	0.0724603	-0.102564
Dynll2	31.8119	2147.49	14.2911	1.3e-17	30.5432	674.036	4.1831	2.99e-09	0.0067	31.3259	0.0146	0.0062	29.2002	0.0436	-0.1057	-0.1014	1.5811	1.81e-26	0	0	2.93e-07	0.2076	2.9669	0.181	2.8779	0.146961	0.0309253	1	1	0.0727974	0.0806452
Cct7	28.2201	836.938	15.526	0	26.9497	452.496	10.6626	0	0.0185	27.2782	0.0327	0.0236	25.42	0.0563	0.3462	-0.1018	0.7837	0	0	0	4.32e-09	0.5042	1.7581	0.5981	1.4437	-0.156997	0.217774	1	1	0.0730999	-0.216102
Sdhb	27.5805	1796.71	55.4834	0	27.6783	289.902	9.4348	0	0.031	27.149	0.0151	0.0326	25.252	0.0871	0.0722	-0.1045	2.5277	0	0	0	1.49e-06	0.8376	1.313	0.8207	1.196	0.0205922	0.0978261	1	1	0.0751228	-0.0490798
AI413582	30.5353	1649.51	19.7967	0	29.062	641.931	8.8414	7.15e-25	0.012	29.9556	0.0182	0.0138	27.7911	0.0433	0.2006	-0.1082	1.252	0	0	0	0.000131	0.357	2.2226	0.3821	1.9657	-0.0656896	0.130691	1	1	0.0778846	-0.130435
Ccz1	30.1846	739.189	6.2868	1.72e-16	27.4534	1343.65	12.3976	3.16e-12	0.0085	28.9849	0.0393	0.0092	26.8871	0.0201	0.1159	-0.1084	-0.9668	0	0	0	1.77e-05	0.2457	2.6408	0.2471	2.4451	-0.00566572	0.0800376	1	1	0.0780225	-0.076087
Abhd5	31.2473	2399.79	20.9147	2.62e-18	30.0303	608.297	8.375	0	0.0087	30.8347	0.0129	0.0138	28.5962	0.0469	0.6657	-0.1087	1.8636	0	0	0	1.06e-10	0.2688	2.5571	0.3921	1.898	-0.314461	0.34726	1	1	0.0782796	-0.369565
Wtap	31.7149	2478.39	18.4375	4.22e-14	29.8304	1053.89	8.3156	8.88e-12	0.0074	31.2961	0.0127	0.0079	28.9916	0.0275	0.0923	-0.1103	1.1147	3.89e-19	0	0	6.91e-06	0.233	2.764	0.2273	2.579	0.025077	0.0717332	1	1	0.0794885	-0.0632911
Unc119	30.0819	1643.59	40.0867	0	29.2565	423.353	13.4046	0	0.0244	29.53	0.018	0.0317	27.3446	0.0646	0.3766	-0.1109	1.8445	0	0	0	7.22e-13	0.721	1.4401	0.8632	1.1711	-0.164736	0.229699	1	1	0.0799207	-0.230284
Tmem14c	29.6	2226.8	54.2296	0	27.7612	1021.28	35.2096	0	0.0243	29.1939	0.0131	0.0344	27.0125	0.0265	0.5018	-0.112	1.0132	0	0	0	3.53e-25	0.7082	1.4521	0.9295	1.0918	-0.238085	0.330005	1	1	0.0807552	-0.293605
Sdf2l1	30.2152	2226.8	59.3455	0	28.1258	1334.03	42.8976	0	0.0267	29.7971	0.0134	0.0321	27.5331	0.0208	0.2652	-0.114	0.6342	0	0	0	2.78e-06	0.7945	1.3646	0.8835	1.1881	-0.100736	0.148557	1	1	0.0822283	-0.168224
Rpf1	30.0627	3897.92	30.1549	2.23e-18	29.3387	453.531	4.1273	2.58e-11	0.0077	29.8134	0.0077	0.0091	27.5358	0.0608	0.2403	-0.1147	2.9759	0	0	0	3.93e-05	0.2302	2.7922	0.2492	2.4316	-0.076244	0.148297	1	1	0.0827141	-0.153846
Myd88	29.5209	2079.99	12.9827	9.59e-12	28.003	659.269	6.5005	1.92e-20	0.0062	29.0959	0.0141	0.0099	26.8445	0.0408	0.6634	-0.1162	1.5306	0	0	0	1.46e-06	0.1813	3.2295	0.2639	2.4439	-0.312997	0.321453	1	1	0.0838682	-0.373737
Cope	32.5793	1514.86	58.9569	0	29.7927	2280.98	103.192	0	0.0391	31.8672	0.021	0.0452	29.3881	0.0129	0.21	-0.1168	-0.7023	0	0	0	1.17e-08	1.233	0.9723	1.3261	0.8191	-0.0702059	0.187035	1	1	0.0843573	-0.134956
Timm44	31.8516	592.375	4.1963	1.43e-12	28.9252	726.526	4.8167	4.52e-08	0.0071	30.2001	0.0511	0.0066	27.81	0.0383	-0.0934	-0.119	-0.4169	0	0	0	1.35e-07	0.2125	2.86	0.1847	2.8411	0.150514	0.00665235	1	1	0.0859439	0.0757576
Tsen34	31.05	1188.08	7.3675	5.65e-12	28.4377	1345.53	9.5117	1.29e-09	0.0062	30.2433	0.0254	0.0071	27.8318	0.0207	0.1938	-0.1199	-0.3002	0	0	0	8.54e-06	0.1867	3.1467	0.1969	2.8087	-0.0518029	0.12034	1	1	0.0866455	-0.126761
Atp6v1c1	32.0323	3430.12	31.4983	1.81e-19	29.5417	2461.38	24.7493	3.73e-17	0.0092	31.7198	0.0093	0.01	29.1762	0.0119	0.1341	-0.1206	0.3547	0	0	0	5.38e-05	0.2924	2.4023	0.2941	2.2034	-0.00578035	0.0902696	1	1	0.0871806	-0.08
Dusp11	29.3389	1857.34	12.2383	2.35e-14	27.4907	787.979	6.4742	5.39e-15	0.0066	28.8641	0.0156	0.0082	26.5479	0.0339	0.315	-0.1207	1.1218	0	0	0	1.95e-05	0.1894	3.1215	0.2176	2.6956	-0.129596	0.157998	1	1	0.0872461	-0.195122
Hcfc1r1	29.8448	2081.11	16.809	1.1e-14	27.742	999.611	10.8398	1.66e-23	0.0081	29.4108	0.0142	0.0108	26.9807	0.027	0.4254	-0.1244	0.9342	0	0	0	2.58e-05	0.2371	2.8149	0.2916	2.3359	-0.1869	0.20506	1	1	0.0900681	-0.25
Trabd	29.5481	2043.31	14.4675	2.07e-17	27.6274	785.872	7.5988	2.92e-19	0.0071	29.1132	0.0143	0.0097	26.6772	0.034	0.4506	-0.1261	1.2512	0	0	0	1.64e-05	0.206	2.955	0.2575	2.4112	-0.2	0.225531	1	1	0.0913139	-0.268041
Atp5l	35.9318	3528.26	176.89	0	35.7856	348.943	19.7898	0	0.0501	35.5591	0.0101	0.0569	32.4093	0.0927	0.1853	-0.1338	3.1956	0	0	0	4.53e-09	1.7881	0.6726	1.8202	0.574	-0.0176354	0.171777	1	1	0.0971882	-0.119508
Zbtb8os	29.9423	984.901	6.1907	2.65e-12	29.3716	264.769	1.8871	2.02e-07	0.0063	29.0411	0.0296	0.0071	26.4287	0.0998	0.1833	-0.136	1.7545	0	0	0	5.69e-06	0.1824	3.1235	0.1877	2.8383	-0.0282365	0.100483	1	1	0.0988471	-0.112676
Ndufs8	28.6401	859.983	22.7141	0	26.5453	488.737	13.3573	0	0.0265	27.6932	0.0322	0.0273	25.1659	0.0516	0.0458	-0.1381	0.6803	8.17e-19	0	0	5.6e-06	0.728	1.4227	0.6874	1.3441	0.0590631	0.0584778	1	1	0.100426	-0.029304
Pex2	30.3122	1617.24	16.8762	2.32e-20	27.9228	831.653	12.4534	2.61e-26	0.0104	29.7225	0.0185	0.015	27.0024	0.0325	0.5269	-0.1385	0.8108	0	0	0	3.23e-08	0.3067	2.3357	0.4043	1.8428	-0.241405	0.267473	1	1	0.100735	-0.306667
Tmem203	29.8152	2348.38	15.4331	2.21e-12	28.0881	551.014	4.3209	1.15e-11	0.0066	29.4311	0.0126	0.0078	26.7071	0.0485	0.2558	-0.1401	1.9503	0	0	0	9.82e-06	0.1935	3.0848	0.2088	2.7492	-0.0732759	0.122072	1	1	0.101995	-0.153846
Abi1	29.2051	2371.04	27.6519	0	27.1767	677.034	8.2865	4.24e-20	0.0116	28.8292	0.0122	0.0123	26.1153	0.0385	0.0756	-0.1426	1.6599	1.57e-24	0	0	2.36e-05	0.3358	2.2883	0.3192	2.1576	0.052005	0.0605766	1	1	0.10392	-0.0569106
Lsm10	32.231	2593.21	13.3648	3.87e-09	29.0928	2969.3	23.4662	6.58e-12	0.0051	31.8137	0.0124	0.0079	28.8002	0.0097	0.6233	-0.1436	-0.3505	0	0	0	7.77e-06	0.1635	3.4254	0.2288	2.6613	-0.285402	0.287115	1	1	0.104635	-0.35443
Mrpl21	30.1627	1929.59	16.8871	3.81e-21	28.3431	511.969	4.9587	8.89e-16	0.0087	29.6813	0.0155	0.0097	26.8391	0.0524	0.1509	-0.1452	1.7607	0	0	0	3.05e-05	0.2581	2.6404	0.2587	2.3945	-0.00231929	0.102694	1	1	0.105898	-0.103093
Ctsh	26.9304	1197.91	44.9332	0	25.2876	405.138	14.0563	0	0.0376	26.3174	0.022	0.0347	23.7865	0.0589	-0.1176	-0.1459	1.4235	0	0	0	1.25e-11	0.9814	1.2718	0.8235	1.3059	0.191743	-0.0261123	1	1	0.106401	0.0835735
Dram1	32.586	535.12	2.6603	7.07e-10	29.4983	457.317	3.6395	2.08e-13	0.005	30.6829	0.0575	0.008	27.6842	0.0604	0.6878	-0.1484	0.0711	0	0	1.91e-13	4.71e-06	0.1516	3.4684	0.2194	2.6453	-0.309025	0.311156	1	1	0.108318	-0.375
Rbbp4	29.0121	1085.27	31.2558	0	27.2585	399.646	12.1929	0	0.0289	28.2368	0.026	0.0306	25.4747	0.0638	0.0826	-0.1485	1.2937	1.73e-18	0	0	1.13e-06	0.8119	1.307	0.7672	1.2358	0.0582638	0.0576145	1	1	0.108425	-0.0555556
Lrrc58	28.7202	1049.41	25.8695	0	26.8638	402.876	11.7702	0	0.0246	27.9371	0.0267	0.0292	25.1683	0.0626	0.2461	-0.1506	1.2291	0	0	0	5.97e-05	0.6861	1.4495	0.7337	1.2908	-0.0648767	0.122947	1	1	0.110011	-0.157534
Ppp6c	28.6354	367.505	4.5401	8.6e-22	26.6591	229.05	3.8333	0	0.0124	26.5306	0.0723	0.0167	23.862	0.1044	0.4364	-0.1529	0.5286	0	0	0	9.88e-07	0.3258	2.2737	0.3989	1.8497	-0.183254	0.229226	1	1	0.111835	-0.257485
Tmem222	27.3266	2199.8	24.0894	1.13e-20	26.6358	273.923	3.2405	1.71e-17	0.0109	26.9789	0.0123	0.0118	24.254	0.0886	0.115	-0.1536	2.8429	0	0	0	2.32e-05	0.295	2.4174	0.2851	2.2692	0.0347247	0.0653094	1	1	0.112348	-0.0762712
Nt5c3	31.3565	1707.38	10.785	3.68e-11	27.9734	2615.51	20.1351	2.75e-11	0.0063	30.776	0.018	0.0077	27.6587	0.0107	0.2804	-0.1541	-0.7576	0	0	0	1.65e-05	0.1936	2.9938	0.2122	2.669	-0.0876532	0.121694	1	1	0.112706	-0.181818
Wbp11	29.6596	2470.74	29.4616	1.26e-25	27.0598	917.599	11.3765	2.89e-19	0.0119	29.2943	0.0119	0.0124	26.28	0.0286	0.0563	-0.1567	1.2717	0	0	0	1.46e-05	0.3495	2.1626	0.3263	2.0835	0.0711002	0.037965	1	1	0.114699	-0.0403226
Reep3	29.7657	3228.14	20.1979	4.74e-15	27.9119	507.612	5.452	9.83e-20	0.0062	29.4821	0.0092	0.0107	26.4353	0.0522	0.7818	-0.1574	2.5012	0	0	0	3.79e-07	0.1846	3.2008	0.2827	2.3859	-0.347011	0.341548	1	1	0.115255	-0.420561
Bzw1	32.0434	2952.69	90.4036	0	29.6829	660.354	23.3702	0	0.0307	31.6728	0.0107	0.0355	28.3867	0.043	0.21	-0.158	2.0026	0	0	0	5.55e-05	0.9603	1.1506	1.0032	1.0344	-0.0427632	0.112336	1	1	0.115762	-0.135211
Spag7	32.3095	3334.69	29.1713	4.72e-19	29.5648	887.913	8.034	6.41e-12	0.0088	31.9766	0.0096	0.0091	28.5958	0.0322	0.0495	-0.1612	1.7479	2.55e-09	0	0	3.36e-06	0.2804	2.4367	0.2586	2.3553	0.0843001	0.0345604	1	1	0.118227	-0.032967
Azin1	31.0881	2290.46	13.5215	1.12e-09	28.8592	544.456	3.9195	5.65e-08	0.0059	30.6491	0.0135	0.0072	27.4022	0.0504	0.2929	-0.1616	1.9042	0	0	0	8.65e-06	0.1799	3.0762	0.1973	2.773	-0.0881906	0.10934	1	1	0.11849	-0.180556
Ssr3	31.2868	3122.47	24.2588	9.36e-18	28.2268	1404.96	17.0435	5.89e-20	0.0078	30.9505	0.0099	0.0121	27.6568	0.0199	0.6392	-0.1623	1.0013	0	0	0	4.52e-08	0.2399	2.686	0.335	2.0551	-0.283881	0.306992	1	1	0.119092	-0.355372
Tmbim6	36.3038	3611.69	192.93	0	33.1263	1044.45	59.118	0	0.0534	35.9239	0.01	0.0567	32.09	0.0307	0.0854	-0.1628	1.6259	0	0	0	1.15e-17	1.9226	0.6086	1.8143	0.5894	0.0596924	0.0325755	1	1	0.119473	-0.0582011
Taf12	32.9218	1941.31	12.7249	5.7e-17	29.2776	1143.1	10.2419	2.01e-14	0.0066	32.345	0.0167	0.009	28.5393	0.0251	0.4497	-0.1806	0.5894	0	0	0	3.31e-05	0.2103	2.9235	0.2554	2.4571	-0.176586	0.189817	1	1	0.133349	-0.266667
2010107E04Rik	32.1534	892.982	10.2912	1.14e-26	28.3253	796.51	13.2767	0	0.0115	31.0166	0.0348	0.0167	27.3324	0.0343	0.5369	-0.1824	-0.0215	0	0	4.81e-13	3.58e-08	0.3552	2.1464	0.4519	1.7275	-0.213985	0.242489	1	1	0.134792	-0.311377
Plekhf2	30.1436	3131.87	41.7599	0	27.4235	636.712	8.8782	1.68e-24	0.0133	29.8441	0.0095	0.014	26.2748	0.0413	0.0665	-0.1838	2.1124	4.71e-22	0	0	1.18e-05	0.3986	2.0468	0.3651	1.9715	0.0917557	0.0381943	1	1	0.135845	-0.05
Zyx	29.832	1096.74	17.1151	0	26.4855	681.617	14.7094	0	0.0156	29.0144	0.0265	0.0216	25.4738	0.0374	0.4698	-0.1878	0.497	0	0	0	2.65e-07	0.4487	1.9493	0.547	1.6198	-0.179707	0.20342	1	1	0.13899	-0.277778
Itm2b	62.0087	7805.82	473.759	0	54.7731	3646.18	248.479	0	0.0607	61.4816	0.0079	0.0683	53.9268	0.0148	0.1711	-0.1892	0.9051	0	0	0	3.73e-11	3.7278	0.1891	3.6707	0.17	0.0155556	0.112353	1	1	0.140094	-0.111274
Ddx39	29.0995	2661.85	54.8456	0	26.2797	641.019	14.6888	0	0.0206	28.7732	0.0108	0.0229	25.2307	0.0395	0.1538	-0.1895	1.8665	0	0	0	9.33e-05	0.5945	1.6037	0.5777	1.496	0.0290808	0.071992	1	1	0.140404	-0.100437
Bre	28.6445	416.276	5.4567	0	25.7219	271.567	3.4847	2.23e-19	0.0131	26.7883	0.0644	0.0129	23.4746	0.0863	-0.0259	-0.1905	0.4223	8.34e-25	0	0	2.53e-07	0.3512	2.2065	0.2999	2.2269	0.171057	-0.00916072	1	1	0.141161	0.0155039
Dpm1	31.6072	3374.36	39.3159	1.77e-25	28.9448	513.344	6.2765	2.2e-22	0.0116	31.2998	0.0093	0.0122	27.3808	0.0533	0.0721	-0.193	2.52	1.56e-18	0	0	5.38e-06	0.3668	2.1224	0.3329	2.0778	0.101832	0.021465	1	1	0.143129	-0.0491803
Edem2	31.5155	470.976	3.759	7.78e-15	26.2635	1295.76	11.867	1.75e-12	0.008	29.4924	0.0629	0.0092	25.7351	0.0199	0.203	-0.1966	-1.6623	0	0	0	2.09e-05	0.2328	2.8018	0.2362	2.5247	-0.0143946	0.109756	1	1	0.145999	-0.130435
Ppm1m	33.3323	1189.67	8.0185	1.68e-12	29.8958	522.021	5.9033	1.18e-18	0.0068	32.4005	0.0272	0.0113	28.2531	0.0543	0.7399	-0.1976	0.9969	0	0	0	2.16e-07	0.2176	2.817	0.3186	2.162	-0.317012	0.30296	1	1	0.146795	-0.39823
Lrrfip2	30.4186	842.221	5.3699	7.04e-12	26.912	526.707	5.1069	2.97e-13	0.0064	29.3381	0.0349	0.0097	25.5803	0.0486	0.6065	-0.1977	0.4774	0	0	0	8.85e-06	0.1865	3.158	0.2466	2.4982	-0.243715	0.26411	1	1	0.146902	-0.340206
Golga7	29.5352	658.331	13.6639	0	27.2759	250.43	6.636	0	0.0208	28.2394	0.0429	0.0265	24.5775	0.0981	0.3531	-0.2004	1.1941	0	0	0	1.99e-06	0.5812	1.6198	0.6493	1.3885	-0.104882	0.166583	1	1	0.148994	-0.215094
Gadd45a	29.1265	1150.41	14.6552	0	25.5031	796.796	15.8801	0	0.0127	28.3873	0.0248	0.02	24.7005	0.031	0.6507	-0.2007	0.3206	0	0	0	8.43e-09	0.3615	2.2571	0.4917	1.7903	-0.264796	0.260738	1	1	0.14926	-0.365
Slmo2	29.9725	2639.59	34.7803	0	26.9891	540.953	6.6768	2.47e-21	0.0131	29.6145	0.0113	0.0124	25.6857	0.0475	-0.0884	-0.2053	2.0744	1.02e-18	0	0	1.55e-08	0.3878	2.0735	0.3163	2.1313	0.226051	-0.0271196	1	1	0.152957	0.0564516
Dusp1	39.0238	3219.63	213.591	0	33.8049	2763.35	190.595	0	0.0663	38.5313	0.012	0.0692	33.375	0.0121	0.0611	-0.2073	0.0101	2.96e-15	0	2.38e-06	7.23e-26	2.544	0.5638	2.2943	0.5895	0.108835	-0.0435963	1	1	0.154496	-0.0419075
Baz2b	30.9297	617.861	11.4005	0	26.3582	794.314	22.5807	0	0.0185	29.4439	0.0476	0.0284	25.4969	0.0321	0.6201	-0.2076	-0.568	0	0	0	5.44e-19	0.5429	1.7273	0.7237	1.3197	-0.249827	0.308858	1	1	0.154803	-0.348592
Srsf7	28.8338	731.063	30.2751	0	24.6739	748.015	32.3373	0	0.0415	27.7172	0.0379	0.0432	23.8725	0.0322	0.0584	-0.2154	-0.2367	0	0	0	2.12e-10	1.1419	1.043	1.0319	1.0491	0.106599	-0.00581451	1	1	0.161051	-0.0393519
2810428I15Rik	30.0463	392.241	4.5309	4.91e-23	25.9561	315.201	5.1506	2.77e-26	0.0116	27.8769	0.0711	0.0163	23.9697	0.0762	0.4983	-0.2179	0.0994	0	0	0	1.72e-06	0.3206	2.309	0.3907	1.8859	-0.179422	0.224349	1	1	0.163006	-0.288344
Timm10b	28.7251	380.968	6.2313	0	26.1099	190.094	5.1032	0	0.0164	26.6865	0.0701	0.0268	22.9314	0.1209	0.7124	-0.2188	0.7868	0	0	0	2.31e-18	0.4348	1.9241	0.6134	1.4456	-0.291164	0.331004	1	1	0.163754	-0.38806
Lmo4	31.4284	394.871	5.4281	0	25.4866	1251.81	25.4907	0	0.0138	29.0955	0.0737	0.0203	24.9687	0.0201	0.5615	-0.2207	-1.8765	0	0	0	2.39e-08	0.3997	2.0949	0.5077	1.6926	-0.212724	0.237682	1	1	0.165279	-0.320197
Pmaip1	30.0916	1344.63	31.2533	0	27.1812	317.46	5.6943	0	0.0232	29.4052	0.0221	0.018	25.0147	0.0787	-0.3645	-0.2333	1.835	0	0	0	8.02e-26	0.6788	1.553	0.4468	1.8433	0.519248	-0.157489	1	1	0.175517	0.288889
Immt	31.8273	3197.92	18.0613	6.37e-10	27.5474	892.25	8.2219	6e-14	0.0056	31.4903	0.0099	0.0092	26.7075	0.03	0.7071	-0.2377	1.6035	0	0	0	6.71e-06	0.1774	3.1389	0.2453	2.4683	-0.276804	0.271685	1	1	0.179081	-0.391304
Alyref	29.8908	3042.28	39.9442	0	27.0601	281.998	4.0986	3.58e-20	0.0131	29.5823	0.0098	0.0145	24.6848	0.0876	0.1495	-0.2611	3.1582	0	0	0	1.91e-05	0.3889	2.0449	0.3597	1.9583	0.0811788	0.044222	1	1	0.198401	-0.0965517
Flot1	30.0074	686.781	10.586	0	25.033	563.79	14.3515	0	0.0154	28.7437	0.0419	0.0255	23.9446	0.0425	0.7242	-0.2635	0.0222	0	0	3.62e-26	8.17e-15	0.4437	1.9463	0.6053	1.4953	-0.266975	0.301612	1	1	0.200425	-0.396078
Slc25a46	32.5659	630.687	3.7304	2.35e-12	27.2004	419.059	3.0096	6.02e-09	0.0059	30.943	0.0491	0.0072	25.5268	0.0611	0.2781	-0.2776	0.3161	0	0	0	3.21e-06	0.1821	3.1084	0.1827	2.8644	-0.00328407	0.0851836	1	1	0.212177	-0.180556
Btf3l4	32.3248	949.383	9.4292	6.37e-21	26.3396	1136.35	15.5857	5.03e-21	0.0099	31.2364	0.0329	0.0137	25.7304	0.0228	0.4623	-0.2798	-0.5315	0	0	0	6.26e-05	0.3085	2.3136	0.3523	2.0003	-0.124326	0.156627	1	1	0.213988	-0.277372
Smim11	34.1993	3957.99	32.3012	1.1e-18	28.0386	2566.06	31.5221	1.4e-25	0.0082	33.8854	0.0086	0.0123	27.7149	0.0109	0.5858	-0.29	0.3448	0	0	0	6.7e-06	0.2773	2.4738	0.3396	2.0295	-0.183451	0.218921	1	1	0.222642	-0.333333
Snrpa	29.3684	659.671	5.9819	1.01e-13	26.5314	158.702	1.9029	1.54e-15	0.0091	28.0816	0.0426	0.012	22.7175	0.1431	0.4072	-0.3058	1.7481	0	0	0	6.2e-05	0.2524	2.566	0.2722	2.2702	-0.0727406	0.130297	1	1	0.236122	-0.241667
Nol7	29.6494	2416.98	42.2681	0	26.7219	202.46	4.9812	0	0.0174	29.2736	0.0122	0.0246	23.5756	0.1169	0.4958	-0.3123	3.2609	0	0	0	3.98e-07	0.5097	1.7861	0.5783	1.5011	-0.118624	0.189861	1	1	0.241691	-0.292683
Umps	28.8817	1431.76	12.4215	4.71e-15	25.3292	214.547	2.1635	1.01e-09	0.0087	28.2992	0.0198	0.0101	22.6344	0.1057	0.2155	-0.3222	2.4177	0	0	0	4.36e-06	0.2461	2.6082	0.2275	2.4567	0.0817582	0.0616681	1	1	0.250274	-0.138614
Grb2	34.5415	1916.88	11.1502	1.02e-14	27.6167	777.356	6.7924	9.31e-11	0.0058	33.909	0.0177	0.0088	26.6475	0.0342	0.591	-0.3477	0.9529	0	0	0	2.62e-05	0.1964	3.0531	0.2311	2.5726	-0.150151	0.186776	1	1	0.272502	-0.340909
Dnajb9	27.8276	1157.32	8.1546	1.56e-13	26.0544	119.084	1.2464	1.1e-18	0.007	27.1515	0.0236	0.0105	21.3216	0.1793	0.5751	-0.3487	2.9256	0	0	0	1.6e-05	0.1906	3.1878	0.2212	2.7377	-0.138336	0.164408	1	1	0.273427	-0.333333
Mfsd10	31.4443	928.33	20.1052	0	24.6678	575.153	15.2495	0	0.0217	30.3962	0.0327	0.0265	23.6343	0.0413	0.2878	-0.363	0.3354	0	0	0	1.51e-05	0.6559	1.5367	0.6251	1.4257	0.0492721	0.0778565	1	1	0.286105	-0.181132
Nt5dc1	38.2434	2515.23	10.9137	9.15e-11	30.0656	356.893	2.9811	7.26e-13	0.0043	37.6417	0.015	0.0084	27.7127	0.0778	0.9434	-0.4418	2.3768	0	0	0	4.26e-06	0.1625	3.3429	0.2316	2.5604	-0.298359	0.305616	1	1	0.358283	-0.488095
Grn	23.1491	119.029	3.747	0	28.6585	881.218	26.331	0	0.0315	19.3537	0.1631	0.0298	27.7262	0.0319	-0.0791	0.5186	-2.355	0	0	0	6.67e-24	0.6074	1.6063	0.8239	1.2075	-0.262775	0.330269	0	1	-0.301971	0.057047
Cnpy3	24.6714	170.975	2.0829	5.21e-22	30.271	1550.82	14.6492	1.23e-14	0.0122	21.5394	0.1261	0.0094	29.6791	0.0192	-0.3687	0.4625	-2.7168	0	0	0	5.37e-05	0.2622	2.6244	0.2796	2.3093	-0.0622318	0.136448	0	1	-0.274257	0.297872
Nfe2	25.4609	550.942	5.8911	2.31e-18	34.1427	1866.7	20.9158	0	0.0107	24.3183	0.0441	0.0112	33.4991	0.018	0.0632	0.4621	-1.2939	8.55e-11	0	0	3.03e-08	0.2589	2.5929	0.3723	2.0068	-0.304593	0.292057	0	1	-0.274061	-0.0446429
Myo1f	25.6787	181.197	1.785	2.05e-18	30.3563	1576.32	16.9117	1.99e-22	0.0099	22.4763	0.124	0.0107	29.7619	0.0189	0.1188	0.4051	-2.7101	0	0	0	5.96e-08	0.2204	2.851	0.3179	2.1524	-0.3067	0.324568	0	1	-0.244796	-0.0747664
Laptm5	25.3035	502.076	13.2476	0	32.3531	1172.14	37.1695	0	0.0264	24.0904	0.048	0.0317	31.4705	0.0269	0.2638	0.3855	-0.8383	0	0	0	0	0.6367	1.5363	0.9969	1.039	-0.36132	0.478633	0	1	-0.234509	-0.167192
Gpx4	32.2806	1103.71	58.954	0	41.2333	5149.25	235.255	0	0.0536	31.3387	0.0284	0.0456	40.8795	0.008	-0.2344	0.3834	-1.8314	0	0	0	1.62e-10	1.6719	0.7367	1.8608	0.5881	-0.101515	0.252678	0	1	-0.233388	0.175439
Lmo2	26.3728	293.086	15.3846	0	31.7626	3304.32	134.457	0	0.0525	24.1752	0.0826	0.0407	31.4445	0.0095	-0.3675	0.3793	-3.1163	0	0	0	2.01e-07	1.2664	0.9855	1.2794	0.8792	-0.010161	0.120905	0	1	-0.231179	0.289926
Anxa2	27.6811	747.017	40.2675	0	35.0282	2965.57	144.548	0	0.0537	26.6533	0.036	0.0487	34.6013	0.0117	-0.1396	0.3765	-1.6244	0	0	0	1.34e-20	1.4219	0.892	1.6875	0.685	-0.157393	0.30219	0	1	-0.229702	0.102669
Clk4	25.5216	518.857	4.3952	7.87e-15	31.9951	2273.58	16.212	2.28e-14	0.0085	24.3013	0.047	0.0071	31.5314	0.0139	-0.2455	0.3758	-1.7617	0	0	0	2e-05	0.2047	3.0103	0.2242	2.6528	-0.0869759	0.134763	0	1	-0.229298	0.197183
Ctsd	22.8612	282.766	7.4702	0	28.967	500.196	14.3633	0	0.0264	21.1331	0.0754	0.0287	27.3625	0.0547	0.1211	0.3727	-0.4622	0	0	0	1.75e-25	0.5575	1.6607	0.7818	1.233	-0.286902	0.346878	0	1	-0.227662	-0.0801394
Cebpe	24.8979	414.795	19.6064	0	30.6108	1841.11	80.1395	0	0.0475	23.4609	0.0565	0.0435	30.0958	0.0164	-0.1273	0.3593	-1.7825	5.28e-25	0	0	3.79e-16	1.0996	1.1562	1.3096	0.9261	-0.160354	0.248461	0	1	-0.220459	0.091954
Cd53	30.2824	1812.22	84.2646	0	38.656	1890.06	89.1655	0	0.0465	29.7726	0.0164	0.0474	37.8534	0.02	0.0284	0.3464	0.2817	2.58e-05	0	0	0	1.3837	0.8982	1.7805	0.6137	-0.222859	0.463582	0	1	-0.213476	-0.0189873
Igsf6	23.3474	212.217	6.0704	0	28.4503	414.826	12.9995	0	0.0286	21.025	0.0991	0.0314	26.6084	0.0641	0.1323	0.3398	-0.6292	0	0	0	2.44e-27	0.6007	1.6394	0.8312	1.2067	-0.27731	0.358581	0	1	-0.209836	-0.089172
Nfu1	24.6367	796.12	21.0486	0	30.2649	2554.64	64.9678	0	0.0264	23.8834	0.0301	0.0254	29.8923	0.0117	-0.0557	0.3238	-1.359	9.84e-18	0	0	9e-12	0.6295	1.5513	0.7598	1.2662	-0.171492	0.225162	0	1	-0.201018	0.0393701
1810037I17Rik	25.1799	580.891	23.0239	0	31.1947	917.547	26.4548	0	0.0396	24.1258	0.0417	0.0288	30.1487	0.0329	-0.4583	0.3215	-0.3419	0	0	0	2.65e-08	0.9566	1.1839	0.8685	1.1655	0.101439	0.0157872	0	1	-0.199773	0.375
Atp1a1	25.8653	130.31	2.0148	0	28.0713	642.54	8.184	2.16e-23	0.0155	21.5727	0.1656	0.0127	26.8787	0.0419	-0.2811	0.3173	-1.982	0	0	0	0.000128	0.3331	2.2324	0.3416	2.0492	-0.0248829	0.0894007	0	1	-0.197405	0.220472
Dedd2	25.5684	643.791	5.5837	3.45e-13	30.8594	3642.57	24.446	2.42e-10	0.0087	24.5768	0.0384	0.0067	30.5741	0.0084	-0.3727	0.315	-2.1841	0	0	0	1.66e-06	0.2132	2.9774	0.2041	2.8102	0.044586	0.0594975	0	1	-0.196156	0.298507
Thoc7	24.8002	242.056	5.9408	0	29.175	587.384	8.8456	0	0.0244	22.421	0.0945	0.0151	27.7862	0.0473	-0.6961	0.3095	-0.9984	0	0	0	2.3e-12	0.5452	1.7007	0.4186	1.814	0.302437	-0.0624587	0	1	-0.193089	0.615894
Yif1b	26.6129	425.472	6.8384	0	31.5889	1644.04	18.448	1.11e-21	0.0161	25.0287	0.0588	0.0112	30.9793	0.0188	-0.5195	0.3077	-1.6413	0	0	0	1.21e-06	0.4009	2.0312	0.3483	1.9993	0.151019	0.0159556	0	1	-0.192083	0.4375
Glrx	26.1794	499.68	13.1973	0	31.0216	2068.76	59.5124	0	0.0265	24.8563	0.0498	0.0288	30.5517	0.0148	0.121	0.2976	-1.7513	0	0	0	6.48e-22	0.6542	1.5451	0.876	1.1851	-0.253196	0.303772	0	1	-0.186418	-0.0798611
Aes	25.3648	896.135	24.8358	0	30.5204	1513.34	37.9268	0	0.0277	24.6602	0.0276	0.0251	29.9006	0.0197	-0.1408	0.278	-0.484	0	0	0	1.65e-06	0.6833	1.4585	0.748	1.2632	-0.0864973	0.154607	0	1	-0.175261	0.103586
Tm6sf1	27.4785	888.494	22.8542	0	32.4251	3690.87	94.861	0	0.0259	26.632	0.0299	0.0257	32.124	0.0087	-0.0118	0.2705	-1.7768	8.74e-15	0	0	3.58e-13	0.6824	1.4658	0.8278	1.1861	-0.175646	0.235815	0	1	-0.170963	0.0077821
Cd177	26.0003	371.107	19.1619	0	29.9023	1416.74	62.7427	0	0.0515	24.2673	0.0658	0.0442	29.2655	0.0207	-0.219	0.2702	-1.6686	0	0	0	0.00634	1.2466	1.0262	1.2909	0.9517	-0.0343171	0.078281	0	1	-0.170788	0.165158
Adssl1	24.3536	299.948	9.3199	0	27.441	2426.68	75.3671	0	0.031	22.4875	0.0753	0.031	27.1152	0.0113	-0.0016	0.27	-2.7404	2.41e-05	0	0	2.5e-13	0.6922	1.4565	0.8399	1.177	-0.175854	0.237468	0	1	-0.170668	0
Alox5ap	39.1586	3519.43	208.885	0	46.9072	4744.15	272.472	0	0.0595	38.6956	0.011	0.0576	46.4127	0.0098	-0.0448	0.2623	-0.1709	4.06e-07	0	0	0	2.2871	0.5284	2.6557	0.3738	-0.138796	0.41359	0	1	-0.166271	0.0329861
Fcgr2b	25.3478	421.021	6.8178	0	28.9236	3261.73	47.6357	0	0.0162	23.9	0.0568	0.0146	28.658	0.0088	-0.1506	0.2619	-2.6886	0	0	0	3.53e-05	0.3871	2.1581	0.4193	1.8693	-0.0767947	0.154496	0	1	-0.166027	0.109589
Chmp4b	26.2125	624.346	15.4865	0	30.9222	1050.77	24.094	0	0.0247	25.1187	0.0404	0.0229	30.0097	0.0286	-0.1095	0.2567	-0.4992	0	0	0	6.26e-08	0.6158	1.6204	0.6828	1.37	-0.0981254	0.182774	0	1	-0.162981	0.0786026
Hexb	27.1798	964.417	20.2973	0	32.1568	1497.51	23.5578	0	0.021	26.4209	0.0275	0.0158	31.4614	0.021	-0.4142	0.2519	-0.3888	0	0	0	1.95e-06	0.5554	1.6986	0.493	1.6999	0.126572	-0.000764751	0	1	-0.160212	0.329114
Marcksl1	27.7093	198.634	5.4083	0	29.5935	1210.66	25.2751	0	0.0272	24.2905	0.1226	0.0209	28.8664	0.0238	-0.3801	0.249	-2.363	0	0	0	1.13e-05	0.6594	1.5451	0.5993	1.536	0.100284	0.00592448	0	1	-0.15852	0.301435
AB124611	25.8287	185.071	6.1112	0	27.7128	965.079	35.0527	0	0.033	22.6649	0.1225	0.0363	26.9292	0.028	0.1373	0.2487	-2.1307	0	0	0	1.53e-24	0.7469	1.4139	0.978	1.0767	-0.236299	0.313179	0	1	-0.158352	-0.0909091
Gng12	27.053	359.941	15.3643	0	30.1226	3182.67	88.3043	0	0.0426	25.1416	0.0701	0.0277	29.8209	0.0094	-0.6213	0.2463	-2.9007	0	0	0	1.29e-26	1.0713	1.1103	0.8251	1.2229	0.298388	-0.0920762	0	1	-0.156913	0.537906
Plaur	23.7189	638.742	20.774	0	28.1716	696.482	20.9258	0	0.0325	22.8557	0.0358	0.0302	27.0614	0.0389	-0.1067	0.2437	0.1197	0	0	0	2.33e-06	0.741	1.49	0.8129	1.2915	-0.0884488	0.153697	0	1	-0.155413	0.0761589
Ssbp4	26.4198	928.952	16.262	0	31.1047	1082.02	14.4664	1.12e-24	0.0176	25.6695	0.0276	0.0134	30.2207	0.0279	-0.3882	0.2355	0.0158	0	0	1.53e-21	9.06e-06	0.4474	1.9264	0.4036	1.8761	0.108523	0.0268109	0	1	-0.150599	0.313433
Bad	25.833	562.652	8.9253	0	30.9214	462.784	8.427	0	0.0158	24.6712	0.0442	0.0182	28.9699	0.0626	0.2058	0.2317	0.503	0	0	0	4.99e-13	0.3888	2.1135	0.5262	1.6125	-0.261117	0.310698	0	1	-0.148385	-0.131868
Ppdpf	27.1443	1075.63	15.2172	0	31.7566	1448	15.2056	1.99e-19	0.0141	26.4628	0.0247	0.0105	31.048	0.0215	-0.4287	0.2305	-0.2007	0	0	0	2.23e-06	0.3738	2.1874	0.3238	2.1453	0.154416	0.0196243	0	1	-0.147681	0.342857
Sgk3	26.927	993.752	14.0322	0	31.1619	2075.81	29.4379	0	0.0141	26.1987	0.0264	0.0142	30.6662	0.0148	0.0038	0.2272	-0.8318	9.56e-16	0	0	6.11e-06	0.3697	2.1206	0.4296	1.7849	-0.139432	0.188078	0	1	-0.145682	-0.00704225
Bin2	23.5994	458.101	11.8034	0	26.7129	1331.19	40.2738	0	0.0258	22.432	0.049	0.0302	26.1612	0.0198	0.2272	0.2219	-1.3095	0	0	0	5.17e-23	0.5763	1.6473	0.7841	1.2359	-0.265017	0.332875	0	1	-0.142547	-0.145695
Nisch	28.4537	466.176	3.8147	3.79e-16	31.8017	1704.7	13.5174	1.06e-16	0.0082	26.784	0.0574	0.0079	31.2083	0.0183	-0.0497	0.2206	-1.6471	7.97e-22	0	0	3.64e-05	0.2165	2.8893	0.2475	2.4903	-0.125253	0.160222	0	1	-0.141767	0.0379747
Prr13	28.7101	730.797	34.1394	0	32.4229	3554.38	138.637	0	0.0468	27.6112	0.0377	0.0389	32.1074	0.0091	-0.2669	0.2176	-2.0583	0	0	0	5.82e-05	1.2881	0.9918	1.2448	0.9852	0.0347847	0.00669915	0	1	-0.140036	0.203085
Pglyrp1	31.1269	507.977	46.0915	0	35.3233	981.708	78.2388	0	0.0911	29.3092	0.0576	0.0802	34.0641	0.0346	-0.1846	0.2169	-0.7359	0	0	0	0.124	2.6549	0.5804	2.7012	0.5497	-0.0171405	0.0558486	0	1	-0.139587	0.13591
Unc93b1	26.2212	457.002	14.9398	0	29.5329	1072.6	30.3197	0	0.0326	24.7794	0.0545	0.0283	28.7223	0.0268	-0.208	0.213	-1.0242	0	0	0	8.93e-06	0.8077	1.354	0.8073	1.2292	0.000495479	0.101529	0	1	-0.137277	0.151943
Ier2	39.5754	1090.98	73.0241	0	44.7764	3308.18	177.709	0	0.067	38.1558	0.035	0.0538	44.1404	0.0133	-0.3164	0.2102	-1.391	0	0	0	2.93e-23	2.5383	0.4602	2.3569	0.4526	0.0769655	0.0167919	0	1	-0.135581	0.245353
Lrpap1	28.7989	457.747	3.1083	8.52e-11	31.5774	3982.99	25.7635	4.16e-12	0.0068	27.0812	0.0592	0.0065	31.3119	0.0079	-0.0718	0.2094	-2.9101	0	0	0	1.6e-05	0.1837	3.1765	0.2027	2.7485	-0.0937346	0.155721	0	1	-0.135115	0.0461538
Atrx	26.9472	653.078	2.5699	1.01e-06	30.2379	2691.8	27.5473	2.24e-24	0.0039	25.8616	0.0396	0.0102	29.882	0.0111	1.3744	0.2085	-1.8295	0	0	0	2.34e-23	0.1013	4.3887	0.3044	2.2015	-0.667214	0.993504	0	1	-0.134543	-0.617647
Ctss	24.0949	686.169	17.5847	0	27.4427	1223.97	26.0501	0	0.0255	23.2573	0.0341	0.0212	26.8286	0.0221	-0.2666	0.2061	-0.6288	0	0	0	5.81e-05	0.5922	1.9736	0.5704	1.9448	0.0382188	0.0148087	0	1	-0.133115	0.20283
Cers2	27.3079	329.411	5.9082	0	29.7266	1195.13	18.5483	0	0.018	25.2031	0.0766	0.0156	28.9837	0.0242	-0.2041	0.2016	-1.6611	0	0	0	0.000107	0.453	1.879	0.4465	1.7263	0.0145577	0.0884551	0	1	-0.130439	0.153846
Gng10	28.4016	1517.23	19.0115	0	32.3958	2512.81	16.7253	7.1e-10	0.0125	27.8662	0.0184	0.0066	31.9713	0.0128	-0.9159	0.1983	-0.5251	0	0	0	1.39e-18	0.3482	2.2137	0.2131	2.6623	0.633975	-0.168501	0	1	-0.1284	0.893939
Fbp1	24.655	444.132	7.8881	0	27.8055	734.903	11.484	0	0.0177	23.3439	0.0527	0.0156	26.766	0.0365	-0.1844	0.1974	-0.5297	0	0	0	0.000223	0.4135	2.0541	0.4143	1.9104	-0.00193097	0.0752198	0	1	-0.127852	0.134615
Psma6	29.2526	1450.18	62.6607	0	33.5427	1513.1	54.0521	0	0.0431	28.6621	0.0199	0.0358	32.8012	0.0217	-0.2701	0.1946	0.1235	0	0	0	5.59e-11	1.2379	0.9688	1.1698	0.9173	0.0582151	0.056143	0	1	-0.126187	0.203911
Lsp1	23.3089	748.626	32.8652	0	26.6044	855.171	42.3121	0	0.0438	22.5895	0.0305	0.0495	25.7847	0.0302	0.1766	0.1909	-0.0166	0	0	9.85e-09	5.26e-22	0.9909	1.2575	1.2709	0.9996	-0.220316	0.258003	0	1	-0.123918	-0.115152
Gpx3	25.1338	520.323	7.5707	0	28.1496	941.698	17.0445	0	0.0145	23.9429	0.0463	0.0181	27.3207	0.029	0.3218	0.1904	-0.6742	0	0	0	4.8e-13	0.3456	2.3152	0.4943	1.7377	-0.300829	0.332336	0	1	-0.123635	-0.198895
Sat1	28.5911	570.85	25.1223	0	31.5404	1901.74	100.111	0	0.0441	27.2133	0.0477	0.0527	31.0032	0.0163	0.2591	0.1881	-1.5484	0	0	0	0	1.1972	1.0391	1.6268	0.7259	-0.264077	0.431464	0	1	-0.122242	-0.163188
Eif4e	24.757	321.384	11.0605	0	26.8321	1067.96	29.031	0	0.0344	22.969	0.0718	0.0271	26.1572	0.0246	-0.3415	0.1875	-1.5453	0	0	0	4.44e-09	0.7894	1.3294	0.707	1.2988	0.116549	0.0235602	0	1	-0.121886	0.269373
Mapk13	26.8442	373.057	6.5923	0	30.4038	451.658	9.1839	0	0.0177	25.0175	0.067	0.0204	28.4689	0.063	0.2004	0.1864	-0.0896	0	0	4.1e-25	4.21e-10	0.4387	2.0204	0.5778	1.6072	-0.240741	0.257093	0	1	-0.121234	-0.132353
Ptprc	28.8563	221.725	1.4408	1.96e-11	29.7839	1143.18	13.5646	2.4e-26	0.0065	25.5235	0.1152	0.0119	29.0085	0.0254	0.8678	0.1846	-2.1818	0	0	0	1.67e-14	0.1658	3.3718	0.3414	2.1698	-0.514353	0.553968	0	1	-0.120137	-0.453782
Fuca1	26.1082	837.696	15.9581	0	29.0377	2413.63	41.9505	0	0.019	25.3044	0.0304	0.0173	28.6773	0.0119	-0.1326	0.1805	-1.346	0	0	0	9.59e-05	0.4811	1.8521	0.4985	1.661	-0.0349047	0.115051	0	1	-0.117616	0.0982659
Igfbp4	24.7693	890.678	10.4911	2.79e-19	29.3405	392.061	3.1224	1.43e-14	0.0118	24.0859	0.0272	0.008	27.2744	0.0695	-0.5559	0.1794	1.3553	0	0	0	1.64e-09	0.2834	2.4715	0.2169	2.5977	0.306593	-0.0485814	0	1	-0.116904	0.475
Lyn	28.9127	1182.33	11.8124	1.07e-26	32.2161	2480.25	34.1901	0	0.01	28.2149	0.0239	0.0137	31.7844	0.0129	0.4569	0.1719	-0.8863	0	0	0	7.21e-14	0.282	2.5167	0.437	1.8192	-0.354691	0.38341	0	1	-0.112304	-0.270073
Fes	26.4045	201.236	2.1658	2.95e-16	27.7567	471.637	6.3738	1.08e-24	0.0108	23.3292	0.116	0.0135	26.2033	0.0556	0.3293	0.1676	-1.061	0	0	0	1.05e-08	0.2507	2.6624	0.3529	2.021	-0.2896	0.317368	0	1	-0.109685	-0.2
Slc48a1	28.3726	300.43	4.7759	0	29.6334	1450.99	20.4509	1.95e-25	0.0159	25.8833	0.0862	0.0141	29.0144	0.02	-0.1718	0.1647	-2.1085	0	0	0	6.52e-05	0.4081	2.0183	0.4058	1.8269	0.00566782	0.104768	0	1	-0.107915	0.12766
Pole4	26.6666	722.282	11.9164	0	29.3003	1370.52	21.1549	0	0.0165	25.6994	0.0356	0.0154	28.6718	0.021	-0.099	0.1579	-0.7609	0	0	0	0.00014	0.4214	1.9729	0.4416	1.7568	-0.0457428	0.123008	0	1	-0.10367	0.0714286
Tmem219	27.6587	1648.01	18.2244	1.75e-24	30.4822	3913.25	38.3853	8.8e-17	0.0111	27.1871	0.0166	0.0098	30.2334	0.0078	-0.1762	0.1532	-1.0896	0	0	0	2.99e-05	0.3016	2.4488	0.2962	2.299	0.0182309	0.0651588	0	1	-0.100759	0.132653
Add3	26.7419	2852.55	16.5819	3.26e-08	30.1668	1156.75	10.2284	2.54e-19	0.0058	26.4846	0.0093	0.0088	29.3919	0.0254	0.6077	0.1503	1.4476	0	0	0	6.38e-08	0.1543	3.4872	0.2595	2.4543	-0.405395	0.420853	0	1	-0.098915	-0.340909
Rab28	27.3157	792.167	14.5097	0	30.4079	725.111	12.5428	0	0.0183	26.3812	0.0333	0.0174	29.1713	0.0402	-0.0762	0.145	0.2711	8.62e-16	0	0	4.61e-05	0.479	1.8261	0.5043	1.616	-0.0501686	0.130012	0	1	-0.0956454	0.0517241
Bphl	27.8177	694.317	6.9277	2.66e-17	29.7393	3059.99	25.405	4.78e-14	0.01	26.7283	0.0385	0.0083	29.4445	0.0096	-0.2705	0.1396	-1.9966	0	0	0	2.35e-06	0.2665	2.6111	0.2455	2.5238	0.0855397	0.0345907	0	1	-0.0922481	0.204819
Ppp1r15a	24.1575	170.856	2.6016	0	26.4859	190.885	3.1367	0	0.0152	21.1454	0.1241	0.0164	23.247	0.1218	0.1128	0.1367	-0.0276	0	0	0	1.76e-05	0.3207	2.4814	0.3816	2.0679	-0.159591	0.199961	0	1	-0.0904031	-0.0731707
Nadk	26.7964	1041.24	12.9777	1.1e-26	30.3569	530.323	7.0928	1.72e-25	0.0124	26.1098	0.0251	0.0134	28.6957	0.0543	0.1018	0.1362	1.1099	0	0	0	5.52e-05	0.3245	2.3082	0.3828	1.9833	-0.152299	0.163818	0	1	-0.0901145	-0.0746269
Abhd11	28.61	1967.45	19.6041	1.41e-21	30.9781	7413.96	82.9892	2.71e-24	0.01	28.1874	0.0143	0.0112	30.8373	0.0042	0.1625	0.1296	-1.7665	0	0	0	4.16e-07	0.2814	2.5416	0.3482	2.0071	-0.191844	0.266305	0	1	-0.0859316	-0.107143
Sgta	27.6194	425.813	3.4499	1.59e-11	29.548	684.869	6.6931	3.54e-15	0.0081	25.9234	0.0609	0.0098	28.311	0.0413	0.2759	0.1271	-0.5601	0	0	0	7.3e-06	0.2091	2.8325	0.2769	2.2692	-0.244854	0.248237	0	1	-0.0843347	-0.173469
Snap23	29.3017	442.251	3.5536	1.56e-16	30.4696	1700.55	17.4359	8.13e-21	0.008	27.4487	0.0621	0.0102	29.921	0.0176	0.3508	0.1244	-1.8181	0	0	0	3.15e-06	0.2192	2.8716	0.3068	2.2863	-0.285528	0.256003	0	1	-0.0826276	-0.215686
Ccdc125	28.9577	876.789	4.7971	1.2e-09	31.6761	857.84	7.9134	4.63e-18	0.0055	28.0139	0.0319	0.0092	30.5326	0.0356	0.7506	0.1242	0.1577	0	0	0	6e-11	0.1527	3.5271	0.2814	2.3277	-0.457356	0.515273	0	1	-0.0824922	-0.402174
Acadl	27.7586	3731.74	25.9758	1.31e-15	31.8356	528.69	3.8484	3.68e-12	0.0069	27.5375	0.0075	0.0073	30.0069	0.0568	0.073	0.1239	2.9263	9.52e-26	0	0	2.18e-05	0.1909	3.0485	0.2174	2.6472	-0.121895	0.151594	0	1	-0.0822944	-0.0547945
Pfdn4	28.0864	507.288	4.9437	3.22e-18	29.3001	2688.08	24.7647	6.62e-17	0.0098	26.6005	0.0524	0.0092	28.9662	0.0108	-0.0809	0.1229	-2.2823	0	0	0	4.11e-05	0.2588	2.6108	0.2663	2.3552	-0.0281637	0.108526	0	1	-0.0816711	0.0652174
Snx2	26.551	958.333	16.6142	0	29.0492	807.14	13.7912	0	0.0173	25.8178	0.0271	0.0171	28.0194	0.0349	-0.0206	0.1181	0.3647	0.000141	0	0	1.43e-05	0.4465	1.9355	0.4786	1.6804	-0.0670706	0.151809	0	1	-0.0785741	0.0116959
Pi16	28.0186	2273.22	19.1873	7.95e-21	30.5138	1945.47	21.3353	2.01e-23	0.0084	27.6672	0.0122	0.0109	30.0209	0.0155	0.3766	0.1178	0.3413	0	0	0	4.86e-07	0.2339	2.7481	0.3272	2.1356	-0.285147	0.286805	0	1	-0.078402	-0.229358
Cnn2	27.7356	785.138	24.2522	0	29.7842	1177.93	44.6072	0	0.0309	26.7579	0.0342	0.038	29.0341	0.0246	0.2983	0.1178	-0.4714	0	0	0	0	0.8191	1.3212	1.1009	0.9687	-0.255972	0.36389	0	1	-0.0783975	-0.186842
Ier3	29.4322	3968.12	38.8461	2.24e-23	32.5768	1164.3	15.0599	0	0.0098	29.204	0.0074	0.0129	31.6721	0.0272	0.4053	0.117	1.8784	0	0	0	1.89e-09	0.2861	2.57	0.4094	1.9503	-0.301172	0.317746	0	1	-0.0779266	-0.24031
Nr2c2ap	25.9871	612.982	7.6273	1.59e-25	27.4589	1710.73	19.2029	1.29e-21	0.0124	24.9035	0.0408	0.0112	27.005	0.0159	-0.1513	0.1169	-1.3575	0	0	0	4.47e-05	0.3079	2.4416	0.3019	2.2349	0.0198741	0.0924874	0	1	-0.0778189	0.107143
Ier3ip1	29.5488	341.125	8.3285	0	30.1267	1280.91	28.24	0	0.0244	27.1754	0.0797	0.022	29.4271	0.023	-0.1472	0.1148	-1.795	0	0	0	6.53e-06	0.6617	1.5096	0.6499	1.3717	0.0181566	0.100532	0	1	-0.0765179	0.109091
Sgpp1	27.8473	1495.63	11.3604	8.2e-13	29.9801	2270.21	20.4344	3.19e-13	0.0076	27.3167	0.0184	0.009	29.5755	0.013	0.2488	0.1146	-0.4927	0	0	0	6.88e-06	0.2064	2.8959	0.266	2.3118	-0.22406	0.25266	0	1	-0.076374	-0.155556
Spg21	27.1181	682.347	17.6173	0	28.6723	1800.56	35.918	0	0.0258	26.0725	0.0383	0.02	28.2138	0.0157	-0.369	0.1139	-1.2893	0	0	0	7.89e-10	0.6741	1.4943	0.5658	1.5221	0.19141	-0.0182642	0	1	-0.0758955	0.29
S100a10	27.6178	274.596	3.6624	0	28.4017	575.409	8.4702	0	0.0133	25.0457	0.092	0.0147	27.0338	0.0476	0.1411	0.1102	-0.9495	0	0	0	7.25e-05	0.3318	2.5816	0.3971	2.2443	-0.164442	0.150292	0	1	-0.0735413	-0.0952381
Prdx6	29.8848	1875.95	84.9024	0	32.3075	1680.48	75.9019	0	0.0453	29.398	0.0157	0.0452	31.6842	0.0189	-0.0022	0.108	0.2664	5.21e-05	0	0	1.63e-08	1.3287	0.9188	1.4292	0.7746	-0.0703191	0.186161	0	1	-0.0721558	0.00221239
Nudt4	26.1965	1203.66	11.6868	7.71e-22	28.551	835.054	8.8379	2.55e-18	0.0097	25.6288	0.0213	0.0106	27.596	0.033	0.1291	0.1067	0.6315	0	0	0	5.1e-05	0.2488	2.6607	0.292	2.2749	-0.147945	0.16959	0	1	-0.0712857	-0.0849057
Gabarapl2	27.5433	691.828	11.0288	0	29.1014	1299.6	21.869	0	0.016	26.4704	0.0383	0.0168	28.4249	0.022	0.0733	0.1028	-0.8013	5.72e-24	3.91e-20	0	4.45e-05	0.4207	2.0025	0.4715	1.7433	-0.107741	0.148684	0	1	-0.0687601	-0.047619
Snx20	29.0103	1806.2	10.6428	2.16e-11	31.1377	1960.57	16.4421	3.73e-16	0.0059	28.5375	0.0158	0.0084	30.6315	0.0156	0.5064	0.1022	-0.0143	0	0	0	1.53e-06	0.1684	3.3334	0.2565	2.5076	-0.34347	0.329319	0	1	-0.068361	-0.297619
Bcl7c	28.9994	2310.85	17.5398	7.09e-12	30.9342	4410.71	23.829	1.04e-05	0.0076	28.6175	0.0124	0.0054	30.7113	0.0071	-0.4898	0.1019	-0.8129	0	0	0	3.97e-09	0.2166	2.8871	0.1677	3.004	0.291592	-0.0389148	0	1	-0.0681769	0.407407
Ebp	28.0915	2072.08	21.0287	2.73e-16	30.8401	759.416	9.9441	5.38e-25	0.0101	27.7001	0.0135	0.0131	29.6162	0.0391	0.3703	0.0965	1.5356	0	0	0	2.73e-09	0.2802	2.5128	0.3874	1.9204	-0.276717	0.308477	0	1	-0.0646977	-0.229008
Apobec3	28.5349	2613.01	20.6032	1.56e-19	30.8912	1231.47	9.1897	1.61e-14	0.0079	28.2149	0.0109	0.0075	30.115	0.0244	-0.0755	0.094	1.1677	0	0	0	8.21e-06	0.2235	2.8705	0.2247	2.6477	-0.00534045	0.0841485	0	1	-0.0630948	0.0533333
Dcun1d1	28.9629	347.618	5.1131	0	29.4342	941.345	16.2199	0	0.0147	26.7193	0.0769	0.0173	28.5154	0.0303	0.2304	0.0939	-1.3451	0	0	0	1.17e-08	0.3915	2.1223	0.4877	1.7	-0.197252	0.248412	0	1	-0.062987	-0.150289
Dhrs7	28.4162	578.944	15.5204	0	29.5854	1233.04	40.9989	0	0.0269	27.0743	0.0467	0.0332	28.8699	0.0235	0.3024	0.0926	-0.9937	0	0	0	1.56e-19	0.7255	1.485	0.9541	1.1685	-0.239598	0.27086	0	1	-0.0621963	-0.189759
Ldha	33.0497	938.707	41.7828	0	34.6202	2002.57	97.0753	0	0.0447	31.9014	0.0339	0.0486	34.0086	0.017	0.1188	0.0923	-0.9996	0	1.65e-25	0	9.74e-15	1.4189	0.8807	1.6452	0.6992	-0.137552	0.259582	0	1	-0.0619608	-0.0802469
Metap2	25.9826	897.476	25.6442	0	27.9233	736.283	20.6934	0	0.0285	25.2282	0.0285	0.0281	26.8918	0.0365	-0.0193	0.0921	0.3572	6.78e-21	0	0	9.99e-05	0.7199	1.4019	0.7559	1.2608	-0.0476253	0.111913	0	1	-0.0618627	0.0142349
Ppp1ca	32.9296	1412.46	80.0519	0	35.6481	893.413	44.5596	0	0.057	32.1551	0.0227	0.0503	34.2452	0.0382	-0.1813	0.0909	0.7507	0	1.13e-15	0	3.08e-21	1.8205	0.6622	1.7002	0.6267	0.0707564	0.0566459	0	1	-0.0610334	0.133201
Tex261	28.0499	1537.22	16.0478	3.84e-27	30.144	982.985	12.163	7.54e-25	0.0105	27.5309	0.0179	0.0124	29.2358	0.0299	0.2393	0.0867	0.7395	0	0	0	8.36e-07	0.2871	2.5006	0.3615	2.0002	-0.205809	0.250175	0	1	-0.0583155	-0.153226
Lat2	26.7433	482.712	10.9887	0	28.1474	595.443	10.3387	0	0.0227	25.3126	0.0526	0.0174	26.8557	0.0452	-0.3897	0.0854	-0.2177	0	7.23e-24	0	4.14e-09	0.5704	1.7864	0.465	1.8658	0.226667	-0.0425555	0	1	-0.0574589	0.304598
Tctex1d2	28.3259	1047.73	13.6777	0	30.0471	1082.66	12.6733	5.62e-24	0.013	27.5652	0.0264	0.0117	29.2245	0.027	-0.1535	0.0843	0.0318	0	0	0	2.98e-05	0.3601	2.1895	0.3428	2.0635	0.0504667	0.0610613	0	1	-0.0567777	0.111111
Ifitm6	21.6365	763.789	30.2227	0	23.0494	691.567	43.9421	0	0.0395	21.022	0.0281	0.0633	22.2814	0.0326	0.6803	0.0839	0.2136	0	0	0	0	0.8305	1.5346	1.4053	1.0671	-0.409023	0.438103	0	1	-0.0565225	-0.375987
Btg1	27.3096	496.223	11.1012	0	27.9104	1517.77	44.1889	0	0.0223	25.8536	0.0523	0.0291	27.3932	0.0181	0.3833	0.0834	-1.5334	0	0	0	6.66e-25	0.5742	1.7098	0.7988	1.2743	-0.281172	0.341756	0	1	-0.0562037	-0.233677
AI467606	28.3845	2527.1	29.9196	0	30.3024	1556.35	19.5881	3.49e-25	0.0118	28.0536	0.0111	0.0126	29.7071	0.0191	0.0899	0.0826	0.7775	6.77e-19	2.3e-27	0	7.06e-05	0.3314	2.3077	0.3722	2.0112	-0.109618	0.147424	0	1	-0.0556601	-0.0634921
Mat2b	25.9238	667.629	15.2181	0	27.9505	489.709	11.083	0	0.0228	24.9429	0.0374	0.0227	26.4128	0.0538	-0.0054	0.0826	0.5253	8.03e-22	0	0	2.59e-05	0.567	1.6587	0.5919	1.4764	-0.0420679	0.123476	0	1	-0.055651	0.00440529
Smim20	28.5843	1970.17	31.3356	0	30.3672	1726.99	29.0228	0	0.0159	28.1708	0.0143	0.0168	29.8234	0.0174	0.0761	0.0822	0.2799	0	0	0	3.39e-05	0.4491	1.9616	0.5	1.6926	-0.1018	0.158927	0	1	-0.0554129	-0.0535714
Lbp	27.7831	1556.6	9.2636	2.3e-12	30.0791	673.747	5.5266	2.05e-11	0.006	27.2837	0.0175	0.0082	28.7679	0.0427	0.4628	0.0764	1.2856	0	0	0	1.33e-06	0.1626	3.3806	0.2345	2.5058	-0.30661	0.34911	0	1	-0.0515922	-0.268293
Fuca2	27.6112	1055.9	9.8853	2.67e-19	28.764	2005.58	22.1405	6.58e-16	0.0094	26.8878	0.0255	0.011	28.3483	0.0142	0.2379	0.0763	-0.8506	0	0	0	1.77e-06	0.2514	2.6592	0.313	2.1122	-0.196805	0.258972	0	1	-0.0515198	-0.145455
Ctsc	26.5596	433.666	7.3058	0	27.8661	499.805	8.3231	0	0.0169	25.0172	0.0578	0.0168	26.3741	0.0527	-0.0071	0.0762	-0.133	4.52e-15	3.19e-27	0	0.000243	0.4211	2.1203	0.4386	2.0098	-0.0398997	0.0549806	0	1	-0.0514482	0.00595238
Creg1	29.7851	1235.82	26.9461	0	32.1373	648.148	11.913	0	0.0219	29.0574	0.0235	0.0184	30.5933	0.0473	-0.2517	0.0743	1.0099	0	3.27e-12	0	8.35e-06	0.6276	1.6365	0.5599	1.6069	0.120914	0.0184206	0	1	-0.0502038	0.190217
Sipa1	27.2925	653.2	4.5882	3.26e-08	28.179	1269.17	11.29	2.21e-14	0.007	26.1882	0.0402	0.0089	27.5542	0.0218	0.337	0.0734	-0.8857	0	0	0	1.03e-05	0.1839	3.1176	0.2453	2.4766	-0.250306	0.258823	0	1	-0.049575	-0.213483
Cbx4	30.3528	817.605	9.2068	1.2e-24	31.1772	1550.6	15.8713	1.76e-19	0.0113	29.2516	0.0358	0.0102	30.5465	0.0197	-0.1366	0.0625	-0.8627	0	0	0	2.38e-05	0.3295	2.2915	0.3119	2.1509	0.0564283	0.065368	0	1	-0.0423911	0.107843
Htatip2	28.4461	789.011	9.093	0	28.9104	3215.84	43.3966	0	0.0115	27.4399	0.0348	0.0135	28.6367	0.0089	0.2262	0.0616	-1.9625	0	5.2e-15	0	4.02e-06	0.3158	2.3438	0.386	1.9321	-0.181865	0.213084	0	1	-0.0417925	-0.148148
Ralbp1	26.5569	966.297	9.839	3.68e-24	27.6519	997.635	16.9269	0	0.0102	25.841	0.0268	0.0169	26.8791	0.0271	0.7313	0.0568	0.0186	0	8.76e-24	0	1.6e-18	0.2635	2.635	0.452	1.8033	-0.417035	0.46121	0	1	-0.0386211	-0.39645
Zfand5	28.4363	966.522	8.0669	5.76e-15	29.3301	1373.36	18.7085	1.04e-26	0.0084	27.6122	0.0286	0.0136	28.6991	0.0209	0.7033	0.0557	-0.4482	0	5.18e-25	0	1.61e-13	0.2309	2.7814	0.3907	1.961	-0.409009	0.418358	0	1	-0.0378723	-0.382353
Elmo1	29.749	3070.05	20.0746	1.04e-11	31.4543	1004.56	7.5747	7.24e-11	0.0065	29.4349	0.0096	0.0076	30.4855	0.0303	0.2071	0.0506	1.6617	0	2.59e-11	0	2.76e-05	0.1912	3.0442	0.2298	2.5753	-0.167972	0.182076	0	1	-0.0344623	-0.144737
Idnk	26.0501	1214.62	9.1132	3.12e-15	27.8687	494.403	3.9122	2.88e-15	0.0075	25.4801	0.0209	0.0079	26.3655	0.0533	0.0724	0.0493	1.3487	8.11e-16	8.95e-13	0	1.11e-05	0.1897	3.1559	0.2079	2.7777	-0.0875421	0.136156	0	1	-0.0335818	-0.0506329
Usp14	30.0647	1957.8	14.0594	3.34e-12	31.1466	1843.28	13.9777	2.65e-09	0.0072	29.5885	0.0152	0.0076	30.6108	0.0167	0.0786	0.049	0.1372	0	3.97e-10	0	2.92e-05	0.2114	2.8843	0.2324	2.4476	-0.0903614	0.17842	0	1	-0.0333967	-0.0526316
Cdc42se2	28.6578	1589.54	10.6381	7.96e-14	29.6052	1792.63	12.6175	2.86e-11	0.0067	28.1346	0.0177	0.0071	29.1026	0.0162	0.0739	0.0488	-0.1274	6.06e-11	2.29e-16	0	1.15e-05	0.1883	3.1567	0.2043	2.7783	-0.0783162	0.136198	0	1	-0.0332616	-0.056338
Acot9	27.5741	1086.08	10.4155	1.79e-20	28.7634	848.838	10.1985	6.87e-20	0.0096	26.8814	0.0247	0.012	27.8046	0.0328	0.3227	0.0487	0.4058	0	0	0	2.91e-06	0.2582	2.5942	0.3333	2.0902	-0.225323	0.241125	0	1	-0.0332031	-0.2
Mtx1	29.5279	839.653	6.0527	1.03e-11	30.7275	739.303	5.062	4.32e-11	0.0072	28.5013	0.0339	0.0069	29.4676	0.0397	-0.0682	0.0481	0.2285	1.13e-09	3.86e-08	0	3.44e-06	0.204	2.9613	0.1998	2.7595	0.021021	0.0731292	0	1	-0.0327919	0.0434783
Hvcn1	27.3413	820.899	7.224	9.24e-18	29.9363	313.561	3.158	6.57e-15	0.0088	26.4499	0.0322	0.0101	27.3069	0.087	0.1988	0.046	1.4324	0	3.74e-12	0	2.77e-05	0.2328	2.7983	0.2752	2.3316	-0.15407	0.200163	0	1	-0.031384	-0.128713
Hck	25.8607	506.249	4.3435	1.67e-17	26.9121	434.055	6.2321	0	0.0086	24.5833	0.0486	0.0143	25.3233	0.0585	0.7414	0.0428	0.2682	0	2.23e-15	0	4.07e-12	0.2099	2.9856	0.3625	2.0732	-0.420966	0.440093	0	1	-0.0292221	-0.398601
Arhgap30	27.9224	1511.29	7.3205	7.25e-07	29.3441	687.6	6.1776	1.08e-16	0.0049	27.3975	0.0181	0.009	28.1389	0.041	0.888	0.0385	1.1774	0	0	0	6.73e-09	0.1319	3.8079	0.2521	2.5189	-0.476795	0.511731	0	1	-0.0263479	-0.455556
Clec4a2	30.3332	2100.63	73.251	0	31.0696	2435.66	116.18	0	0.0348	29.8851	0.0143	0.0477	30.6567	0.0126	0.4554	0.0368	-0.1803	0	7.56e-14	0	0	1.0407	1.1489	1.4566	0.806	-0.285528	0.425434	0	1	-0.025169	-0.27044
Pop5	25.2733	1479.88	15.0776	1.34e-18	26.7617	537.346	5.6523	3.81e-16	0.0102	24.8365	0.0168	0.0105	25.4742	0.0476	0.0423	0.0366	1.5047	1.47e-12	1.78e-13	0	4.37e-05	0.2533	2.6816	0.2667	2.3557	-0.0502437	0.138345	0	1	-0.0250332	-0.0285714
Rbfa	28.9816	1016.66	20.026	0	29.339	1778.78	33.5027	0	0.0197	28.1638	0.0277	0.0189	28.8494	0.0162	-0.065	0.0347	-0.7719	2.55e-22	3.95e-11	0	7.04e-05	0.5527	1.6999	0.5432	1.5674	0.017489	0.0845349	0	1	-0.0237648	0.042328
Chst12	28.6039	412.689	9.1993	0	28.0165	1189.45	32.4719	0	0.0223	26.7215	0.0649	0.0272	27.348	0.0231	0.289	0.0334	-1.4895	0	3.04e-23	0	1.02e-15	0.5932	1.6018	0.7395	1.2572	-0.197836	0.274101	0	1	-0.0229084	-0.180147
Cdkn2d	26.1728	1332.48	50.1359	0	28.0971	395.339	14.8744	0	0.0375	25.6457	0.0195	0.0376	26.203	0.0664	0.004	0.031	1.7698	8.73e-09	3.15e-12	0	6.9e-06	0.9586	1.2096	0.9782	1.1028	-0.0200368	0.0968444	0	1	-0.0212686	-0.00265957
Mrpl33	29.5368	796.975	39.0734	0	29.8622	885.276	47.7416	0	0.0492	28.4608	0.0357	0.0541	28.8672	0.0326	0.1352	0.0205	-0.1298	0	1.61e-10	0	8.17e-10	1.389	0.8763	1.5551	0.7236	-0.10681	0.211028	0	1	-0.0140783	-0.090573
Aldh3b1	26.8728	1596.79	27.098	0	28.1005	554.491	12.3314	0	0.017	26.4139	0.0165	0.0222	26.7302	0.0485	0.3891	0.0172	1.5528	0	6.33e-24	0	2.93e-13	0.4471	1.9197	0.5948	1.4932	-0.248319	0.285628	0	1	-0.0118331	-0.234234
Tmed4	29.7059	1324.99	10.8457	1.52e-20	30.3858	924.468	6.5745	4.46e-08	0.0082	29.0453	0.0219	0.0071	29.3851	0.0319	-0.2063	0.0168	0.5421	0	2.86e-14	0	2.37e-07	0.2381	2.724	0.2073	2.6861	0.148577	0.0141097	0	1	-0.0115637	0.15493
Ctsb	28.6494	1379.78	69.3939	0	29.0704	1077.24	53.6969	0	0.0503	28.0563	0.0204	0.0498	28.2871	0.0263	-0.0126	0.0118	0.3695	1.78e-07	1.37e-09	0	5.83e-06	1.4123	0.8796	1.4062	0.8157	0.00433793	0.0783376	0	1	-0.0081592	0.0100402
Pqlc1	31.3015	1029.77	6.4945	2.52e-12	31.5925	976.805	6.5361	3.65e-11	0.0063	30.3665	0.0295	0.0067	30.5845	0.0313	0.0881	0.0103	0.0851	2.4e-24	1.3e-12	0	9.73e-06	0.1915	3.0987	0.2041	2.7541	-0.0617344	0.125123	0	1	-0.00712779	-0.0597015
Acyp1	28.314	652.429	5.9293	3.34e-16	28.621	598.557	5.8854	3.2e-16	0.0091	27.1248	0.0416	0.0098	27.2976	0.0456	0.1122	0.0092	0.1343	0	4.27e-06	0	5e-05	0.2463	2.7084	0.2683	2.3732	-0.0819978	0.141244	0	1	-0.00633023	-0.0714286
H13	28.4989	687.759	15.8889	0	28.4047	879.496	20.8824	0	0.0231	27.3426	0.0399	0.0237	27.4943	0.0313	0.0411	0.008	-0.3495	1.13e-06	0.00333	0	2.24e-05	0.6295	1.5839	0.6499	1.409	-0.0313894	0.124131	0	1	-0.00551751	-0.0253165
2210016F16Rik	28.3592	714.933	4.8424	2.36e-09	27.9651	1229.12	10.7237	1.09e-11	0.0068	27.2643	0.0382	0.0087	27.3297	0.0222	0.3658	0.0035	-0.7791	0	0.00408	0	1.18e-05	0.184	3.1188	0.238	2.4818	-0.226891	0.256669	0	1	-0.002393	-0.218391
Bola2	28.8772	556.197	5.7946	6.02e-21	30.0586	320.221	3.9032	1.82e-20	0.0104	27.4331	0.0493	0.0122	27.4678	0.0859	0.2276	0.0018	0.8009	0	1.08e-12	0	3.81e-05	0.285	2.3995	0.3346	2.0342	-0.148237	0.179579	0	1	-0.0012633	-0.147541
Lrg1	24.8733	495.883	15.4981	0	25.092	419.788	19.0972	0	0.0313	23.675	0.0478	0.0454	23.6614	0.0566	0.5395	-0.0008	0.244	0	3.44e-16	0	1.81e-24	0.7396	1.5318	1.0727	1.2134	-0.310525	0.262403	0	1	0.000574776	-0.310573
Rassf5	28.5964	2061.75	12.1196	1.01e-10	28.5026	1848.39	16.0654	2.52e-15	0.0059	28.1861	0.0137	0.0087	28.0535	0.0152	0.5608	-0.0068	0.1553	0	7.88e-19	0	1.77e-06	0.1647	3.3934	0.2428	2.5396	-0.321664	0.336195	0	1	0.00472668	-0.321839
G0s2	27.9323	1446.73	10.5154	1.74e-14	27.4771	3564.61	38.1609	0	0.0073	27.3912	0.019	0.0107	27.2556	0.0077	0.5569	-0.0072	-1.3063	0	2.39e-05	0	8.08e-06	0.1987	3.169	0.2916	2.5515	-0.318587	0.242015	0	1	0.00497512	-0.317757
Serpine2	27.5714	447.672	9.2175	0	26.7514	721.647	9.0097	5.38e-24	0.0206	25.9444	0.0579	0.0125	25.7823	0.0358	-0.7237	-0.009	-0.694	0	1.41e-22	0	1.19e-25	0.5308	1.8219	0.3212	2.2512	0.652553	-0.190698	0	1	0.00628726	0.648
Rasgrp2	28.4338	2067.2	52.9168	0	28.9615	731.818	22.2477	0	0.0256	28.035	0.0136	0.0303	27.833	0.0382	0.2462	-0.0104	1.4889	0	1.82e-09	0	5.07e-11	0.7194	1.4277	0.8414	1.1792	-0.144996	0.210736	0	1	0.00725757	-0.155116
Rps2	44.6861	7064.32	371.083	0	44.5447	3837.76	228.913	0	0.0524	44.3777	0.0063	0.0598	44.0008	0.0115	0.1915	-0.0123	0.8581	0	0.000716	0	0	2.3279	0.5331	2.6147	0.4543	-0.109688	0.173454	0	1	0.00856575	-0.123746
Eef1a1	39.7663	2559.46	162.255	0	39.9792	1316.67	89.4712	0	0.0636	39.1195	0.0153	0.068	38.7813	0.0295	0.0961	-0.0125	0.9489	0	3.3e-11	0	1.15e-11	2.4609	0.493	2.6321	0.4345	-0.0650431	0.134638	0	1	0.0087207	-0.0647059
4930523C07Rik	27.0898	468.457	2.6596	4.32e-07	25.8074	1350.66	13.0475	4.79e-12	0.0057	25.5921	0.0546	0.0096	25.3138	0.0189	0.7598	-0.0158	-1.5323	0	1.76e-17	0	2.36e-07	0.1445	3.5715	0.2439	2.5597	-0.407544	0.395281	0	1	0.010994	-0.40625
Hiat1	29.9414	2640.95	32.0473	0	30.4122	790.002	9.905	4.46e-24	0.0121	29.5862	0.0112	0.0125	29.2574	0.0371	0.0497	-0.0161	1.7216	1.22e-08	0.000854	0	0.000147	0.3582	2.1655	0.364	1.9678	-0.0159341	0.100468	0	1	0.0112382	-0.032
Mt1	28.6737	1948.19	115.294	0	29.2889	569.347	30.8866	0	0.059	28.24	0.0146	0.0542	27.8193	0.0489	-0.1224	-0.0217	1.7444	0	4.65e-17	0	1.18e-12	1.6667	0.7764	1.4933	0.8243	0.116119	-0.0581099	0	1	0.0151226	0.0885609
Itgb2	28.4555	1330.54	42.6867	0	28.433	730.767	28.0058	0	0.0321	27.8425	0.0213	0.0384	27.3587	0.0375	0.2593	-0.0253	0.8161	0	7.08e-08	0	4.1e-12	0.8958	1.2462	1.0486	1.0282	-0.145718	0.212021	0	1	0.0176836	-0.164063
Samhd1	28.0534	1044.06	10.6806	1.33e-24	27.8902	708.491	10.1854	0	0.0103	27.2953	0.0261	0.0144	26.8194	0.038	0.4854	-0.0254	0.5408	0	6.69e-26	0	1.29e-06	0.2768	2.6476	0.3854	2.1127	-0.281785	0.253183	0	1	0.0177446	-0.284722
Camk1	29.5967	919.709	9.1022	5.55e-22	28.9719	941.226	8.8031	7.57e-15	0.0099	28.6497	0.0311	0.0094	28.0864	0.0298	-0.0802	-0.0286	-0.0629	7.87e-12	7.97e-05	3.45e-16	4.74e-06	0.2818	2.5472	0.2618	2.4406	0.0763942	0.0436778	0	1	0.020056	0.0531915
Syce2	31.6028	1746.51	17.2335	6.57e-18	31.0287	1493.35	10.2244	2.43e-11	0.0099	31.0154	0.0178	0.0068	30.3894	0.0204	-0.5278	-0.0294	0.1975	0	0	0	1.39e-12	0.3036	2.4166	0.2079	2.7066	0.460317	-0.107145	0	1	0.0205993	0.455882
Atp6ap2	28.3537	1697.18	69.8869	0	28.2248	838.715	36.0089	0	0.0411	27.8725	0.0165	0.043	27.297	0.0325	0.0632	-0.0301	0.9795	0	3.95e-12	0	1.46e-07	1.1465	1.0253	1.1731	0.9027	-0.022675	0.135815	0	1	0.0210829	-0.044186
Mrpl22	28.6278	1708.78	14.0859	2.08e-13	28.0741	1395.48	11.9402	1.5e-15	0.0083	28.1442	0.0165	0.0086	27.5091	0.0198	0.0518	-0.0329	0.2607	8.83e-21	1.5e-12	0	1.29e-05	0.2326	2.7344	0.2345	2.5324	-0.00810235	0.0797662	0	1	0.0230869	-0.0348837
Tmem38b	29.7414	2262.5	40.8058	0	29.1493	1731.85	41.2372	0	0.018	29.3292	0.013	0.0238	28.6397	0.0166	0.4016	-0.0343	0.3508	0	6.96e-09	0	1.9e-14	0.5253	1.7555	0.6737	1.3794	-0.220276	0.272655	0	1	0.024075	-0.243697
Sdcbp	29.1824	1474.97	61.4841	0	31.9174	224.712	9.9878	0	0.0417	28.594	0.0194	0.0446	27.9008	0.124	0.0981	-0.0354	2.6758	1.97e-20	3.22e-06	0	1.88e-08	1.1851	0.9838	1.2308	0.8591	-0.0371303	0.145152	0	1	0.0248452	-0.0650224
Sfxn1	30.5725	4981.71	28.5344	8.21e-09	29.8271	3886.26	24.3789	1.1e-07	0.0057	30.3709	0.0061	0.0063	29.5792	0.0077	0.1304	-0.0381	0.3288	0	8.42e-08	0	1.28e-05	0.1748	3.2036	0.1861	2.7578	-0.06072	0.161651	0	1	0.0267654	-0.0952381
Spint2	29.677	2050.26	65.4714	0	28.8369	2298	61.357	0	0.0319	29.2422	0.0143	0.0267	28.4594	0.0124	-0.2572	-0.0391	-0.2039	0	1.43e-11	0	7.52e-16	0.9326	1.2244	0.7574	1.3058	0.231318	-0.0623373	0	1	0.0275059	0.194757
N4bp2l1	28.2234	1620.35	11.5013	1.69e-15	27.3251	2172.8	15.99	3.2e-12	0.0071	27.7256	0.0171	0.0074	26.9677	0.0124	0.0495	-0.04	-0.4602	1.15e-05	3.9e-06	0	2.57e-06	0.1967	3.1128	0.1976	2.8951	-0.00455466	0.075196	0	1	0.028104	-0.0405405
Wls	28.8499	839.468	4.4533	3.05e-07	28.1856	718.426	5.8777	5.65e-12	0.0053	27.8797	0.0332	0.0082	27.1094	0.0377	0.6214	-0.0404	0.1841	0	3.16e-11	0	1.85e-06	0.1481	3.5427	0.2217	2.6176	-0.33198	0.353415	0	1	0.0284145	-0.353659
Mbd3	28.3541	782.499	6.1542	1.32e-13	27.3901	906.076	7.01	5.7e-11	0.0079	27.3423	0.0351	0.0077	26.5826	0.0293	-0.022	-0.0407	-0.2584	0.000447	4.73e-26	0	4.1e-06	0.2145	2.8923	0.206	2.6728	0.0412621	0.0821236	0	1	0.0285788	0.025974
BC017643	28.9247	687.079	4.4044	5.42e-12	27.7472	969.417	9.9261	3.01e-16	0.0064	27.7458	0.0403	0.0102	26.9586	0.0279	0.6702	-0.0415	-0.5344	0	2.83e-22	0	6.41e-08	0.1773	3.2178	0.2754	2.3311	-0.356209	0.380378	0	1	0.0292003	-0.372549
Lyz2	26.6084	821.25	79.0542	0	25.4136	1450.33	160.173	0	0.0961	25.7477	0.0315	0.1103	24.9597	0.0172	0.1986	-0.0448	-0.867	0	1.93e-11	0	3.79e-10	2.4608	0.7041	2.7372	0.6694	-0.100979	0.0518375	0	1	0.0315709	-0.12874
Anxa3	27.1687	627.801	18.0689	0	25.9186	901.525	29.2758	0	0.0287	26.0194	0.0418	0.0324	25.1835	0.028	0.1758	-0.0471	-0.5779	0	0	0	3.76e-08	0.747	1.409	0.8161	1.206	-0.084671	0.168325	0	1	0.0331924	-0.114198
Khk	27.6104	599.249	11.4971	0	26.8199	522.639	13.8567	0	0.0192	26.3815	0.0441	0.0266	25.4955	0.0487	0.471	-0.0493	0.1457	0	4.28e-16	0	2.32e-17	0.506	1.853	0.6739	1.4092	-0.249147	0.31493	0	1	0.0347512	-0.278195
Hk3	29.6217	348.735	5.4715	0	27.9603	469.146	8.8245	0	0.0157	27.2897	0.0782	0.0188	26.3724	0.0564	0.2577	-0.0493	-0.471	0	3.38e-24	0	3.7e-06	0.4279	1.9426	0.4958	1.6402	-0.13695	0.184368	0	1	0.0347826	-0.164894
Slc16a3	28.6276	679.546	3.9323	2.06e-09	27.1209	984.674	14.4679	0	0.0058	27.4583	0.0404	0.0147	26.3787	0.0268	1.3402	-0.0579	-0.5916	0	2.29e-17	0	4.92e-25	0.1592	3.4257	0.3856	1.976	-0.587137	0.733654	0	1	0.040927	-0.605442
Mbnl1	27.8271	652.713	9.8826	0	27.6455	339.261	5.9775	0	0.0151	26.6712	0.041	0.0176	25.5485	0.0754	0.2184	-0.062	0.8794	0	0	0	7.89e-05	0.4032	2.0673	0.4498	1.8017	-0.103602	0.147416	0	1	0.0439439	-0.142045
Atp8b4	29.5219	884.846	8.2342	1.04e-16	28.087	1039	13.1876	9.44e-21	0.0093	28.5561	0.0323	0.0127	27.3347	0.0264	0.4447	-0.0631	-0.2914	0	0	0	3.87e-07	0.2651	2.557	0.3464	2.0187	-0.2347	0.266657	0	1	0.0446831	-0.267717
Adrbk1	29.4182	662.277	3.9359	1.28e-13	28.1219	619.186	5.6162	6.19e-14	0.0059	28.1345	0.0427	0.0091	26.8862	0.0434	0.6139	-0.0655	0.0251	0	7.95e-19	3.68e-23	1.58e-06	0.1657	3.3808	0.2432	2.5184	-0.318668	0.34244	0	1	0.046429	-0.351648
Ly86	27.705	1310.81	16.9315	0	29.0811	236.859	3.4269	0	0.0129	27.1147	0.0208	0.0145	25.8898	0.1094	0.1663	-0.0667	2.396	0	0	0	0.000129	0.3492	2.3759	0.3737	2.1439	-0.0655606	0.108214	0	1	0.0473121	-0.110345
Asna1	30.0496	1469.12	13.0778	1.19e-17	28.766	1156.78	11.0285	6.48e-13	0.0089	29.4262	0.0202	0.0095	28.0473	0.0243	0.0985	-0.0692	0.2721	0	0	0	3.61e-05	0.2616	2.5504	0.2661	2.3291	-0.0169109	0.0950152	0	1	0.0491634	-0.0631579
Tnfaip8l2	29.2509	781.673	7.541	2.83e-27	28.1058	605.985	10.7985	0	0.0097	28.1774	0.0361	0.0178	26.8432	0.0443	0.8863	-0.07	0.2945	0	0	0	6.94e-19	0.2714	2.6529	0.4773	1.808	-0.431385	0.467312	0	1	0.0497035	-0.455056
Arl2bp	29.1565	682.016	7.6959	2.34e-26	27.1316	1428.69	14.1707	1.53e-14	0.0113	27.9454	0.041	0.0099	26.6171	0.0187	-0.1864	-0.0703	-1.1348	0	0	0	3.48e-08	0.315	2.3663	0.2647	2.4312	0.190026	-0.0266946	0	1	0.049904	0.141414
Hnrnph1	29.5197	1235.81	7.5478	8.6e-10	28.3958	805.482	5.7203	6.47e-09	0.0061	28.818	0.0233	0.0071	27.4163	0.034	0.2227	-0.0719	0.5432	0	5.57e-26	0	1.31e-05	0.1755	3.1899	0.1947	2.7739	-0.0986133	0.149969	0	1	0.0511265	-0.140845
Acsl1	31.8833	3014.76	18.9597	1.63e-15	30.3549	2103.88	15.5219	1.12e-11	0.0063	31.5375	0.0105	0.0074	29.9073	0.0142	0.2318	-0.0766	0.4411	0	1.25e-18	0	2.2e-05	0.1992	3.0171	0.2207	2.6167	-0.0974173	0.153017	0	1	0.0545084	-0.148649
Emp3	31.2528	1194.08	57.5308	0	30.1244	665.183	40.0134	0	0.0483	30.437	0.0255	0.0603	28.8009	0.0433	0.3218	-0.0797	0.7612	0	0	0	3.88e-20	1.4653	0.866	1.7304	0.6584	-0.153202	0.31531	0	1	0.0568073	-0.199005
Rgs2	27.3783	1378.04	15.9222	0	26.1733	812.395	15.5581	0	0.0116	26.8337	0.0195	0.0191	25.3334	0.0314	0.7253	-0.083	0.6875	0	0	0	1.09e-15	0.3089	2.5135	0.4829	1.7963	-0.360323	0.399265	0	1	0.0592222	-0.39267
Cd48	31.0563	669.243	7.3403	3.01e-27	28.9589	866.396	14.3878	0	0.011	29.6671	0.0443	0.0166	27.9967	0.0324	0.5905	-0.0836	-0.45	0	0	0	1.91e-10	0.3253	2.4131	0.463	1.8521	-0.297408	0.302899	0	1	0.0596642	-0.337349
Rps6ka1	28.5827	1966.54	21.9115	0	27.7183	595.485	10.1604	0	0.0111	28.1602	0.0143	0.0171	26.4639	0.0445	0.6146	-0.0896	1.6344	0	0	0	4.71e-13	0.313	2.3458	0.4497	1.742	-0.30398	0.346613	0	1	0.0640986	-0.350877
Tuba4a	25.638	605.521	25.6866	0	25.6694	221.123	11.7322	0	0.0423	24.5789	0.0409	0.0531	22.9889	0.1041	0.3268	-0.0965	1.3492	0	0	0	1.89e-13	1.0395	1.1444	1.218	0.9315	-0.146552	0.228556	0	1	0.0691638	-0.20339
Cd69	29.4925	3730.08	20.3424	8.44e-12	29.4148	389.241	3.5335	6.63e-16	0.0054	29.2535	0.0079	0.0091	27.3397	0.0702	0.7387	-0.0976	3.1587	0	0	0	1.61e-06	0.1602	3.4996	0.2486	2.5959	-0.355591	0.348126	0	1	0.0700008	-0.406593
Zwint	29.5164	934.619	6.5615	2e-18	27.9742	589.92	5.3926	4.09e-13	0.007	28.592	0.0307	0.0091	26.6708	0.0452	0.3829	-0.1004	0.5608	0	0	0	2.89e-05	0.1996	2.9262	0.2408	2.4387	-0.171096	0.199902	0	1	0.0720338	-0.230769
Fam32a	27.8061	977.872	17.4785	0	26.0202	735.303	18.0092	0	0.0179	27.0218	0.0276	0.0245	25.1172	0.0342	0.4529	-0.1054	0.3076	0	0	0	8.73e-13	0.4817	1.8577	0.6138	1.4605	-0.215217	0.271962	0	1	0.0758285	-0.269388
Ptp4a3	31.9376	1132.08	9.0544	1.68e-14	30.025	727.846	5.3519	4.37e-11	0.008	31.0363	0.0274	0.0073	28.8021	0.0397	-0.1303	-0.1078	0.5374	0	0	0	7.49e-08	0.248	2.6602	0.2098	2.6786	0.182078	-0.00686926	0	1	0.0775707	0.0958904
Mapre1	29.326	521.906	10.5998	0	26.1317	982.265	23.8194	0	0.0203	27.7469	0.0532	0.0242	25.4406	0.0261	0.2518	-0.1252	-1.0275	0	0	0	2.79e-05	0.5612	1.6514	0.6155	1.4463	-0.088221	0.14181	0	1	0.0906543	-0.161157
Eci2	30.7669	2478.74	21.9722	4.81e-18	29.2999	497.026	6.1068	3.72e-23	0.0088	30.365	0.0123	0.0123	27.6507	0.0557	0.4751	-0.1351	2.1779	0	0	0	4.33e-06	0.2673	2.5485	0.3385	2.0647	-0.21034	0.23432	0	1	0.0981639	-0.284553
Snx10	30.8209	1837.09	13.2549	6.91e-17	29.4294	445.907	4.3107	8.73e-16	0.0072	30.2996	0.0166	0.0097	27.5837	0.0619	0.4232	-0.1355	1.9012	0	0	0	2.77e-05	0.2185	2.9193	0.2663	2.4327	-0.179497	0.200025	0	1	0.0984603	-0.257732
Ppp1r7	30.4446	693.868	4.907	3.31e-14	28.3196	401.384	2.7912	4.71e-10	0.0071	29.1389	0.0421	0.007	26.4271	0.0658	-0.0197	-0.1409	0.6442	0.00372	0	0	3.94e-07	0.2042	2.9654	0.1827	2.8764	0.117679	0.0309415	0	1	0.102614	0.0142857
Rilpl2	29.9255	739.654	8.2017	1.31e-23	27.1679	607.792	8.9871	0	0.0111	28.7452	0.039	0.0148	25.9903	0.0429	0.4146	-0.1453	0.1405	0	0	0	5.43e-06	0.3181	2.3693	0.3829	1.9625	-0.169235	0.207287	0	1	0.105997	-0.25
Gstm1	25.9883	480.803	17.8115	0	27.2086	122.941	5.0238	0	0.037	24.6355	0.0515	0.0409	22.2647	0.1814	0.143	-0.146	1.8171	0	0	0	0.0112	0.9107	1.272	0.9095	1.2271	0.00131941	0.0365903	0	1	0.106482	-0.0953545
Actn1	32.6662	2486.69	15.245	6.3e-12	29.9992	908.409	6.2113	2.33e-09	0.0061	32.2243	0.013	0.0068	29.024	0.0319	0.1563	-0.1509	1.3025	0	0	0	1.77e-06	0.1974	3.0314	0.1986	2.8447	-0.0060423	0.0656308	0	1	0.110264	-0.102941
Ero1l	29.9838	1318.07	11.6423	3.97e-17	27.4346	612.701	7.3403	5.26e-18	0.0089	29.3103	0.0223	0.012	26.2444	0.0429	0.4373	-0.1594	0.9467	0	0	0	1.31e-05	0.2586	2.5725	0.3141	2.1111	-0.176695	0.218559	0	1	0.116821	-0.258333
Nucb2	30.4761	558.702	5.4835	1e-21	29.9478	186.603	2.3637	1.35e-21	0.0098	28.8728	0.0517	0.0127	25.7935	0.1382	0.3696	-0.1627	1.4183	0	0	0	3.1e-05	0.2817	2.4712	0.3262	2.085	-0.136419	0.185228	0	1	0.119383	-0.228346
Palm	28.9245	644.302	5.2117	2.38e-19	25.4711	655.529	6.5864	7.52e-13	0.0081	27.6543	0.0429	0.01	24.4992	0.0375	0.3071	-0.1748	-0.1929	0	0	0	3.01e-05	0.222	2.87	0.2457	2.4399	-0.0964591	0.176278	0	1	0.128784	-0.19
Hmgcl	27.9984	1311.39	8.3685	1.23e-11	26.0169	362.266	3.3383	1.07e-13	0.0064	27.39	0.021	0.0092	24.2509	0.0669	0.535	-0.1756	1.6737	0	0	0	1.79e-05	0.1732	3.2682	0.2222	2.7239	-0.220522	0.199824	0	1	0.129443	-0.304348
Syngr2	32.115	1918.73	38.1246	0	28.1716	2451.3	51.8647	0	0.02	31.565	0.0164	0.0211	27.8343	0.0114	0.0779	-0.1815	-0.5201	0	0	0	8.06e-06	0.6263	1.5804	0.5883	1.4779	0.0645929	0.0693552	0	1	0.134032	-0.0521327
Tpd52l2	30.7435	1023.19	7.6772	4.11e-17	29.0248	273.904	2.5328	9.19e-11	0.0075	29.8368	0.0292	0.0093	26.2227	0.0958	0.3024	-0.1863	1.7136	0	0	0	2.23e-05	0.2237	2.7992	0.2417	2.5358	-0.0744725	0.103873	0	1	0.137823	-0.193548
Acat1	31.783	1269.54	15.7302	1.54e-24	28.9174	470.344	7.7973	0	0.0124	30.9803	0.0244	0.0166	27.2233	0.0578	0.4177	-0.1865	1.2472	0	0	0	1.07e-05	0.3822	2.0419	0.4505	1.7429	-0.151609	0.171553	0	1	0.138007	-0.253012
Htra2	29.931	2170.99	13.0663	1.64e-09	26.8552	730.749	5.989	1.4e-11	0.006	29.5053	0.0137	0.0082	25.8842	0.0357	0.4495	-0.1889	1.3757	0	0	0	2.12e-05	0.1777	3.1793	0.2118	2.6314	-0.161001	0.208216	0	1	0.139896	-0.268293
Plp2	30.618	1432.69	35.2595	0	27.6683	478.015	15.2551	0	0.0246	29.9651	0.0209	0.0321	26.1401	0.0546	0.3805	-0.197	1.3835	0	0	0	3.14e-06	0.7384	1.4146	0.8305	1.2314	-0.110897	0.148774	0	1	0.146327	-0.233645
Ifngr2	31.1453	2967.27	16.6185	3.54e-11	27.8946	744.337	7.2323	3.41e-19	0.0056	30.8051	0.0105	0.0097	26.8648	0.036	0.8051	-0.1975	1.7836	0	0	0	8.3e-07	0.1722	3.3568	0.2595	2.4778	-0.336416	0.35475	0	1	0.146671	-0.42268
Ccnl2	30.0591	1145.91	11.2273	2.59e-25	27.0987	424.136	4.1784	1.26e-13	0.0098	29.2792	0.0256	0.0098	25.4558	0.0602	0.0069	-0.2019	1.2342	0.272	0	0	4.48e-07	0.2865	2.4802	0.25	2.4666	0.146	0.00551366	0	1	0.150198	0
Exosc3	31.3436	1282.33	10.9063	1.52e-17	27.4169	798.308	9.8276	5.58e-19	0.0085	30.581	0.0238	0.0123	26.4891	0.0331	0.5354	-0.2072	0.4751	0	0	0	3.2e-06	0.2599	2.5791	0.3251	2.0802	-0.200554	0.239833	0	1	0.154475	-0.308943
Psap	27.4215	618.717	19.3891	0	25.243	221.666	8.8839	0	0.0313	26.2409	0.0425	0.0401	22.654	0.1022	0.358	-0.2121	1.2664	0	0	0	7.37e-07	0.8194	1.4436	0.908	1.2538	-0.0975771	0.15138	0	1	0.158334	-0.219451
Gda	29.2141	1296.13	8.064	9.9e-13	26.3842	377.949	5.298	0	0.0062	28.5512	0.022	0.014	24.6399	0.0653	1.1685	-0.2126	1.5686	0	0	0	7.64e-14	0.1776	3.2323	0.3437	2.1448	-0.48327	0.50704	0	1	0.158738	-0.557143
Rassf1	31.585	880.596	4.8712	3.17e-11	27.8769	396.771	3.2979	2.21e-13	0.0056	30.4729	0.0346	0.0083	26.0259	0.0656	0.5843	-0.2276	0.9244	0	0	0	1.66e-05	0.1676	3.3353	0.2159	2.7205	-0.223715	0.225988	0	1	0.170868	-0.325301
Coro1b	34.6499	2744.56	26.2112	0	28.5586	964.697	13.9448	0	0.0095	34.1994	0.0125	0.0144	27.7282	0.0288	0.5974	-0.3026	1.2071	0	0	0	4.25e-06	0.3259	2.3254	0.4013	1.9281	-0.187889	0.206058	0	1	0.23338	-0.340278
Qsox1	32.2222	394.731	2.0313	1.55e-07	25.2431	554.812	5.1357	1.26e-14	0.0052	29.7794	0.0754	0.0093	24.1258	0.0434	0.8497	-0.3037	-0.7962	0	0	0	5.91e-06	0.1531	3.4868	0.2223	2.676	-0.311291	0.30299	0	1	0.234338	-0.44086
Yaf2	31.2678	2773.15	53.4371	0	26.6867	369.372	7.9455	0	0.0193	30.9115	0.0112	0.0216	24.87	0.0672	0.1647	-0.3137	2.5907	0	0	0	1.09e-06	0.5977	1.6013	0.5321	1.5991	0.123285	0.00137577	0	1	0.242923	-0.106481
Mapre2	29.7554	739.376	8.3942	5.72e-19	24.4108	285.172	4.6028	5.14e-23	0.0114	28.5848	0.0386	0.0161	22.4591	0.0792	0.5034	-0.3479	1.0347	0	0	0	9.68e-05	0.3228	2.2855	0.3603	1.9937	-0.10408	0.146361	0	1	0.272749	-0.291925
Elane	17.4422	142.695	25.3632	0	9.6748	40.9145	12.6992	0	0.1779	15.4795	0.112	0.3554	7.5572	0.2296	0.998	-1.0344	1.0365	0	0	0	1.59e-08	2.7463	0.7631	2.5108	0.8389	0.0937948	-0.0903564	0	1	1.04831	-0.499437
Mpo	8.3331	12.8512	2.4024	0	19.3066	191.472	9.3217	0	0.2312	4.9203	0.4274	0.0486	17.5061	0.0925	-2.251	1.8311	-2.2077	0	0	0	2.35e-07	0.9822	1.5969	0.8482	1.6846	0.157982	-0.0520598	0	0	-0.718938	3.7572
Mrpl23	19.0049	34.6965	1.4778	0	26.9195	663.579	15.3426	0	0.0426	12.2598	0.3545	0.0231	25.8337	0.0391	-0.8854	1.0753	-3.1809	0	0	0	1.67e-06	0.5219	1.7272	0.5902	1.472	-0.115723	0.17337	0	0	-0.525434	0.844156
Chil3	24.2483	1080.17	179.921	0	45.1531	2648.82	290.721	0	0.1658	23.6936	0.0222	0.1102	44.3589	0.0167	-0.5887	0.9047	-0.4087	0	0	0	0	3.9141	0.5628	4.8482	0.3622	-0.192669	0.553838	0	0	-0.465866	0.504537
Ccdc115	21.7665	47.7002	1.8506	0	28.5213	891.633	18.2572	0	0.039	14.9346	0.314	0.0205	27.6143	0.031	-0.9293	0.8868	-3.3383	0	0	0	0.000132	0.5806	1.6198	0.5615	1.5243	0.034016	0.0626517	0	0	-0.459172	0.902439
Sap30	22.2377	58.3446	2.6817	0	29.4303	1040.71	25.147	0	0.0462	16.0654	0.2778	0.0242	28.6012	0.0275	-0.9331	0.8321	-3.3382	0	0	0	5.44e-05	0.7395	1.4432	0.6905	1.4196	0.0709631	0.0166244	0	0	-0.438296	0.909091
Polr2c	21.6766	48.0188	1.1124	0	26.6694	950.783	13.1528	5.55e-26	0.0232	14.923	0.311	0.0138	25.9302	0.0273	-0.7449	0.7971	-3.5083	0	0	0	0.000152	0.3456	2.2186	0.3588	2.0063	-0.0367893	0.105817	0	0	-0.424493	0.681159
Scnn1a	21.9018	44.8096	0.5262	3.64e-11	28.3199	207.41	1.8707	2.7e-11	0.0118	14.6888	0.3279	0.009	24.8918	0.1201	-0.3838	0.761	-1.4492	0	0	0	1.44e-05	0.1718	3.1992	0.2236	2.5755	-0.231664	0.242167	0	0	-0.409894	0.311111
Pebp1	24.7679	45.6588	1.3	0	28.39	539.439	8.548	5.24e-26	0.0285	16.0369	0.3516	0.0158	26.9609	0.0501	-0.8466	0.7495	-2.8111	0	0	0	3.3e-05	0.4568	1.9106	0.4269	1.8118	0.0700398	0.0545314	0	0	-0.405179	0.803797
1810006J02Rik	22.7913	73.5895	0.6798	2.16e-10	29.183	2688.76	21.2812	3.24e-13	0.0093	17.3813	0.2366	0.0079	28.8583	0.0108	-0.2285	0.7314	-4.4586	0	0	0	4.36e-06	0.1607	3.3241	0.2291	2.535	-0.29856	0.311282	0	0	-0.397702	0.177215
Phb2	21.6314	63.2892	1.8644	0	27.1795	1399.62	26.533	0	0.0295	16.1072	0.2546	0.019	26.6409	0.0191	-0.6359	0.7259	-3.7396	0	0	0	3.07e-05	0.4731	1.8787	0.5042	1.6387	-0.0616819	0.146458	0	0	-0.395396	0.552632
Rps20	24.3974	99.508	6.3408	0	32.6918	1544.7	70.8797	0	0.0639	19.5827	0.1969	0.0459	31.9945	0.0207	-0.4763	0.7082	-3.2479	0	0	0	6.73e-15	1.2478	0.9805	1.4645	0.7879	-0.147969	0.244447	0	0	-0.387935	0.392157
Tmem165	24.5602	103.113	1.9079	0	32.6577	1841.46	34.8591	0	0.0185	19.7854	0.192	0.0189	32.0636	0.0174	0.0328	0.6965	-3.462	4.54e-05	0	0	0	0.3635	2.1262	0.6061	1.4548	-0.400264	0.461507	0	0	-0.382933	-0.021164
Pin1	22.6837	125.752	4.1437	0	31.3212	940.145	17.6465	0	0.0329	19.1854	0.1533	0.0188	30.2903	0.0322	-0.8097	0.6588	-2.2505	0	0	0	3.98e-06	0.6301	1.5609	0.566	1.5243	0.113251	0.024011	0	0	-0.366616	0.75
Rpl28	26.2735	209.698	12.8483	0	36.5535	3761.45	180.119	0	0.0614	23.3219	0.1112	0.0479	36.1788	0.0096	-0.3576	0.6335	-3.5314	0	0	0	4.22e-26	1.423	0.8669	1.7332	0.667	-0.178975	0.2997	0	0	-0.355371	0.281837
Lgals3	26.6571	861.185	65.8398	0	40.357	2817.57	184.959	0	0.0765	25.8472	0.0301	0.0657	39.7682	0.0141	-0.2202	0.6216	-1.0886	0	0	0	0	1.9747	0.7959	2.613	0.5302	-0.244279	0.501132	0	0	-0.350054	0.164384
Rps25	32.3846	1013.37	58.6172	0	47.8243	8077.68	356.926	0	0.0579	31.3642	0.031	0.0441	47.503	0.0059	-0.393	0.5989	-2.3924	0	0	0	4.2e-19	1.8121	0.6839	2.0878	0.5223	-0.132053	0.309401	0	0	-0.339743	0.312925
Rab11a	22.8917	123.717	2.7476	0	29.3036	1592.9	30.3709	0	0.0222	19.2884	0.1567	0.0191	28.7493	0.0181	-0.2202	0.5758	-3.1131	0	0	0	8.58e-10	0.4274	1.995	0.5452	1.5966	-0.216067	0.24953	0	0	-0.329083	0.162304
Bola1	24.6046	121.934	1.1526	2e-10	31.2135	1246.82	9.3046	2.39e-12	0.0095	20.4687	0.1679	0.0075	30.4363	0.0244	-0.3385	0.5724	-2.7819	0	0	0	2.78e-05	0.1929	3.0392	0.2266	2.5528	-0.14872	0.190536	0	0	-0.327491	0.266667
Gtf2h5	23.8947	205.039	5.1078	0	32.0293	2900.72	47.8026	0	0.0249	21.3921	0.1044	0.0165	31.6658	0.0109	-0.5982	0.5658	-3.2532	0	0	0	0.000166	0.5322	1.73	0.5202	1.6107	0.0230681	0.0740672	0	0	-0.324442	0.509091
Mgst1	27.9476	679.089	34.9914	0	40.3723	2484.21	108.282	0	0.0515	26.8196	0.0397	0.0439	39.6982	0.016	-0.2286	0.5658	-1.3147	0	0	0	0	1.3771	0.9393	1.7303	0.6891	-0.204126	0.363082	0	0	-0.324413	0.173121
Cd81	25.1264	321.621	23.6703	0	34.465	5168.38	189.161	0	0.0736	23.2692	0.0724	0.0365	34.225	0.0067	-1.0111	0.5566	-3.4391	0	0	0	0	1.6973	0.8116	1.2573	0.9357	0.349956	-0.132628	0	0	-0.320111	1.01644
Rpl36	31.088	1236.03	75.5335	0	45.4784	1890.32	101.295	0	0.0613	30.2979	0.0245	0.0539	44.3756	0.0234	-0.1837	0.5505	-0.0643	0	0	1.41e-12	0	1.8428	0.6703	2.3732	0.4637	-0.223496	0.445547	0	0	-0.31724	0.137291
Rpl36a	27.5022	372.832	19.5017	0	37.6638	4042.78	183.403	0	0.0522	25.591	0.0689	0.0453	37.2862	0.0092	-0.2052	0.543	-2.8983	0	0	0	0	1.3354	0.9338	1.6821	0.7128	-0.206111	0.310045	0	0	-0.31366	0.152318
S100a11	32.7923	742.497	50.7535	0	46.1508	4455.42	248.797	0	0.0684	31.3895	0.0423	0.056	45.6487	0.0102	-0.2873	0.5403	-2.0471	0	0	0	0	2.1433	0.6011	2.5513	0.4254	-0.159918	0.413023	0	0	-0.312368	0.221429
Psma7	25.618	93.0923	6.7225	0	30.3154	755.703	39.7974	0	0.0723	20.0783	0.2156	0.0527	29.1264	0.0386	-0.4557	0.5367	-2.4831	0	0	0	1.18e-07	1.447	0.8643	1.5311	0.7337	-0.0549278	0.178002	0	0	-0.310649	0.371917
Cox5b	27.343	371.46	19.9921	0	37.2384	3103.93	123.873	0	0.0538	25.4513	0.0686	0.0399	36.7692	0.0119	-0.4306	0.5308	-2.5329	0	0	0	2.51e-08	1.3664	0.8736	1.4632	0.7339	-0.0661564	0.190353	0	0	-0.307809	0.348371
Ccr1	23.7966	121.35	3.6262	0	29.4799	816.24	23.6158	0	0.0299	19.8598	0.1642	0.029	28.4438	0.0348	-0.045	0.5183	-2.2365	0	0	0	7.81e-27	0.5918	1.6446	0.8237	1.2158	-0.281535	0.35269	0	0	-0.301788	0.0310345
D8Ertd738e	25.9475	452.075	20.7837	0	35.3878	4767.53	147.188	0	0.046	24.5279	0.0543	0.0308	35.0994	0.0074	-0.5774	0.517	-2.8777	0	0	0	5.35e-09	1.126	1.0438	1.0786	0.9732	0.0439459	0.0725442	0	0	-0.301187	0.493506
Wdr89	25.1746	335.566	17.3093	0	34.3238	1315.28	48.4086	0	0.0515	23.3914	0.07	0.0369	33.4194	0.0254	-0.4817	0.5147	-1.4637	0	0	0	3.72e-05	1.2024	0.9446	1.2222	0.864	-0.0162003	0.093287	0	0	-0.300065	0.395664
Rpl14	37.442	1047.55	82.4422	0	52.0062	4389.78	251.409	0	0.0792	36.1281	0.0344	0.0575	51.3492	0.0117	-0.4629	0.5072	-1.5609	0	0	0	0.000284	2.8436	0.4298	2.927	0.3923	-0.0284933	0.0955901	0	0	-0.296423	0.377391
Sra1	26.1109	270.944	4.3213	0	34.1802	3133.22	39.225	0	0.016	23.8059	0.0881	0.0125	33.7984	0.0108	-0.348	0.5056	-3.029	0	0	0	4.06e-05	0.3791	2.131	0.4237	1.8427	-0.105263	0.156455	0	0	-0.29565	0.28
Sys1	26.3424	164.564	3.5365	0	32.7961	1530.33	29.3413	0	0.0216	22.6936	0.1379	0.0192	32.0928	0.021	-0.169	0.5	-2.7153	0	0	0	9.11e-13	0.4879	1.8691	0.6151	1.4649	-0.206796	0.275923	0	0	-0.292876	0.125
Tyms	25.6598	169.436	3.1467	0	31.4669	5143.96	54.2517	5.47e-25	0.0186	22.2504	0.1315	0.0105	31.2535	0.0061	-0.8212	0.4902	-4.4297	0	0	0	1.7e-10	0.4112	2.0366	0.328	2.2029	0.253659	-0.0754914	0	0	-0.288067	0.771429
Psma1	25.3597	149.691	6.7035	0	30.7904	2292.15	78.4841	0	0.0448	21.6751	0.1449	0.0343	30.3748	0.0133	-0.3879	0.4868	-3.4503	0	0	0	1.4e-07	0.9713	1.1553	1.0432	0.9986	-0.0689225	0.15692	0	0	-0.286412	0.306122
Kctd20	26.2725	183.226	2.1088	5.22e-21	32.5135	3212.99	35.4232	1.12e-26	0.0116	22.958	0.1252	0.011	32.1693	0.0101	-0.072	0.4867	-3.6348	2.88e-18	0	0	3.95e-08	0.264	2.6044	0.353	2.0052	-0.252125	0.298823	0	0	-0.286338	0.0545455
Fth1	34.6557	1425.22	108.499	0	47.7375	5786.51	343.157	0	0.0764	33.817	0.0237	0.0594	47.3123	0.0082	-0.365	0.4845	-1.5376	0	0	0	5.53e-10	2.5764	0.488	2.7962	0.3863	-0.0786067	0.263267	0	0	-0.285239	0.286195
Tsc22d3	23.5613	199.744	11.2208	0	30.8572	637.052	25.8351	0	0.0563	21.0519	0.1054	0.0407	29.4139	0.0461	-0.4672	0.4825	-1.1925	0	0	0	9.28e-06	1.1776	1.0508	1.1904	0.9586	-0.0107527	0.0961819	0	0	-0.284287	0.383292
Polr2g	23.3019	132.691	4.4376	0	28.1629	1644.15	33.6051	0	0.0335	19.8126	0.1494	0.0204	27.6734	0.017	-0.7147	0.4821	-3.1394	0	0	0	1.41e-08	0.6615	1.5197	0.5649	1.5213	0.171004	-0.00105173	0	0	-0.284056	0.642157
H2-DMa	24.0016	178.664	4.436	0	30.3987	946.874	12.8491	0	0.0248	21.1485	0.1184	0.0136	29.4291	0.0311	-0.8697	0.4767	-1.9301	0	0	0	1.08e-10	0.5258	1.91	0.3976	2.0288	0.322435	-0.0585568	0	0	-0.281375	0.823529
Npm3	24.2333	187.764	5.727	0	30.4295	1401.51	23.3326	0	0.0305	21.4533	0.1143	0.0167	29.7571	0.0212	-0.8719	0.472	-2.4291	0	0	0	4.39e-16	0.6541	1.541	0.4919	1.6915	0.329742	-0.0889743	0	0	-0.279053	0.826347
Rps8	35.1742	462.193	37.422	0	45.6076	3994.73	259.153	0	0.0812	32.6713	0.0707	0.065	45.0607	0.0113	-0.3221	0.4638	-2.6478	0	0	0	0	2.6431	0.449	2.9157	0.3721	-0.0934938	0.206665	0	0	-0.274949	0.249231
Pgd	24.6329	175.043	4.628	0	30.0539	2005.83	62.7164	0	0.0264	21.5813	0.1233	0.0312	29.592	0.0148	0.2394	0.4554	-3.0569	0	0	0	0	0.5697	1.642	0.9236	1.0796	-0.383175	0.520934	0	0	-0.270705	-0.153846
Emc6	24.6598	159.971	4.1263	0	30.9041	541.047	9.5308	0	0.0258	21.3369	0.1334	0.0177	29.217	0.0539	-0.5463	0.4535	-1.3066	0	0	0	5.43e-05	0.5479	1.7142	0.5139	1.6043	0.0661607	0.0685034	0	0	-0.269709	0.457627
Rps17	28.2196	735.357	42.9957	0	37.7909	2273.96	126.938	0	0.0586	27.1553	0.0369	0.0558	37.1525	0.0164	-0.07	0.4522	-1.1741	0	0	0	0	1.5864	0.7946	2.0725	0.5602	-0.234548	0.418422	0	0	-0.269086	0.0501792
Grina	24.7164	144.69	1.6643	1.94e-16	29.4869	1257.05	14.573	0	0.0115	21.0777	0.1456	0.0116	28.7915	0.0229	0.0074	0.4499	-2.6657	7.34e-06	0	0	1.54e-06	0.2402	2.7716	0.3333	2.19	-0.279328	0.265571	0	0	-0.267919	-0.00862069
Sec11c	22.7649	171.666	10.1416	0	28.0998	1087.82	48.9519	0	0.059	20.065	0.1172	0.0449	27.3775	0.0253	-0.3932	0.4483	-2.2142	0	0	0	5.52e-08	1.1776	1.0032	1.2276	0.8744	-0.0407299	0.147301	0	0	-0.267099	0.314031
Stub1	24.6531	439.915	7.4477	0	32.4214	1394.06	20.0544	0	0.017	23.3278	0.053	0.0144	31.6613	0.0227	-0.2346	0.4407	-1.2231	0	0	0	1.48e-06	0.3929	2.0753	0.4539	1.7319	-0.134391	0.198279	0	0	-0.263208	0.180556
4921524J17Rik	25.247	390.843	6.5786	0	32.6016	2468.64	19.9013	4.59e-18	0.0168	23.6989	0.0609	0.0081	32.1646	0.0131	-1.0614	0.4407	-2.2217	0	0	0	2.02e-16	0.398	2.0658	0.2608	2.3692	0.526074	-0.12806	0	0	-0.263199	1.07407
Bub3	23.3954	224.806	8.8106	0	29.2792	1430.04	44.4336	0	0.0391	21.1514	0.0945	0.031	28.6781	0.0201	-0.3327	0.4392	-2.2308	0	0	0	1.68e-06	0.823	1.3356	0.8916	1.1604	-0.0769403	0.150982	0	0	-0.262455	0.26129
Ostf1	29.0239	874.638	49.747	0	38.7314	2303.82	107.474	0	0.057	28.0777	0.0321	0.0467	38.0651	0.0165	-0.2878	0.439	-0.9572	0	0	0	1.12e-09	1.5946	0.7694	1.7719	0.6185	-0.100062	0.243977	0	0	-0.262377	0.220557
Eif3g	22.703	158.861	4.4971	0	28.1648	606.876	12.618	0	0.0283	19.8483	0.1249	0.0209	26.899	0.0443	-0.4424	0.4385	-1.4966	0	0	0	0.000133	0.5597	1.6678	0.5573	1.5399	0.00430648	0.0830573	0	0	-0.262118	0.354067
Sumo3	23.7156	114.719	5.3472	0	27.2647	1154.05	41.1573	0	0.0466	19.6443	0.1713	0.0357	26.6166	0.0231	-0.3871	0.4382	-2.8921	0	0	0	3.96e-07	0.9142	1.209	0.9463	1.0665	-0.0339216	0.133615	0	0	-0.261953	0.305322
Lamp1	26.5282	544.952	31.1948	0	34.6582	2791.29	118.27	0	0.0574	25.2911	0.0465	0.0424	34.215	0.0123	-0.4357	0.436	-1.9219	0	0	0	1.11e-05	1.4501	0.8503	1.4507	0.773	-0.000413593	0.1	0	0	-0.260818	0.353774
Npc2	24.3024	491.884	28.9544	0	32.4215	816.881	35.5123	0	0.0589	23.1363	0.0471	0.0435	31.1689	0.0382	-0.4355	0.4299	-0.3036	0	0	0	3.81e-06	1.3539	0.9579	1.3538	0.8672	7.38662e-05	0.104589	0	0	-0.257712	0.354023
Cebpzos	25.4839	172.379	1.6228	4.15e-11	31.0408	761.245	5.6811	1.78e-12	0.0094	22.1579	0.1286	0.0075	29.8101	0.0392	-0.3341	0.428	-1.7147	0	0	0	1.75e-05	0.2073	2.9447	0.222	2.6243	-0.0662162	0.12209	0	0	-0.256698	0.253333
Skap2	24.1091	424.014	15.6265	0	31.083	2257.77	81.0463	0	0.0368	22.7951	0.0541	0.0359	30.6408	0.0136	-0.0346	0.4267	-1.9934	0	0	0	0	0.8377	1.2873	1.0979	0.9642	-0.236998	0.335096	0	0	-0.256054	0.0250696
Gpsm3	25.2514	388.045	16.9618	0	33.0995	836.81	31.2872	0	0.0437	23.6881	0.0613	0.0374	31.822	0.038	-0.2225	0.4259	-0.6879	0	0	0	1.96e-14	1.0335	1.1239	1.187	0.9062	-0.129318	0.240234	0	0	-0.255606	0.168449
Dynll1	27.6921	750.4	25.4766	0	36.0925	5382.58	187.911	0	0.0339	26.6768	0.0357	0.0349	35.8327	0.0067	0.0429	0.4257	-2.4221	4.28e-13	0	0	0	0.8989	1.2623	1.2543	0.888	-0.283345	0.421509	0	0	-0.255518	-0.0286533
Rpl29	30.2131	877.024	51.5933	0	39.9004	2319.88	119.641	0	0.0589	29.1944	0.0333	0.0516	39.2027	0.0169	-0.1916	0.4253	-0.9772	0	0	0	1.06e-26	1.7168	0.7219	2.0212	0.5508	-0.150604	0.310639	0	0	-0.255296	0.141473
2700094K13Rik	24.2381	507.772	15.4594	0	31.3183	2735.99	54.65	0	0.0304	23.1062	0.0458	0.02	30.9474	0.0113	-0.6027	0.4215	-2.0176	0	0	0	4e-07	0.6973	1.4653	0.62	1.4532	0.124677	0.00832645	0	0	-0.253372	0.52
Puf60	25.185	197.895	4.1301	0	30.9075	913.686	14.3381	0	0.0209	22.3267	0.1129	0.0157	29.8763	0.0327	-0.4083	0.4202	-1.7896	0	0	0	0.000132	0.4656	1.8476	0.4674	1.687	-0.00385109	0.0951986	0	0	-0.252695	0.33121
Rps15a	35.651	923.115	55.9891	0	46.1779	5539.47	284.314	0	0.0608	34.2906	0.0371	0.0513	45.7614	0.0083	-0.2439	0.4163	-2.1661	0	0	0	1.43e-21	2.0683	0.6011	2.3412	0.4814	-0.116564	0.24865	0	0	-0.250665	0.185185
Bcap31	24.9239	253.875	9.3642	0	30.6562	2505.44	66.5164	0	0.0369	22.6834	0.0895	0.0265	30.2709	0.0121	-0.4749	0.4163	-2.8865	0	0	0	1.57e-06	0.8355	1.2919	0.804	1.194	0.0391791	0.0819933	0	0	-0.250653	0.392453
Atp6v0b	26.0576	245.416	13.759	0	32.9839	680.815	33.1841	0	0.0561	23.548	0.096	0.0489	31.4246	0.0461	-0.1979	0.4163	-1.0593	0	0	0	2.5e-16	1.3211	0.9149	1.5189	0.7093	-0.130226	0.289863	0	0	-0.250651	0.147239
Cct8	23.6858	82.1141	2.581	0	27.5984	219.044	6.2518	0	0.0315	18.3486	0.2235	0.0286	24.4852	0.1117	-0.1385	0.4162	-0.9998	0	0	0	1.1e-10	0.5731	1.5987	0.6972	1.3098	-0.177998	0.220568	0	0	-0.250625	0.101399
Mid1ip1	26.5467	1551.74	16.949	1.85e-19	35.2989	2358.81	21.2677	1.52e-21	0.0109	26.0868	0.0168	0.0091	34.7552	0.0147	-0.2695	0.4139	-0.1941	0	0	0	0.000102	0.285	2.4425	0.3132	2.166	-0.0900383	0.127655	0	0	-0.249413	0.197802
Tpt1	33.0733	2930.42	152.883	0	43.9396	5255.62	239.322	0	0.0524	32.6794	0.0111	0.0455	43.5376	0.0083	-0.2044	0.4139	-0.422	0	0	0	7e-19	1.7017	0.726	1.9675	0.5497	-0.135095	0.32072	0	0	-0.249398	0.151648
Sec61b	23.6005	194.072	10.6011	0	28.8774	900.569	42.9986	0	0.0546	21.0124	0.1087	0.048	27.9606	0.031	-0.1858	0.4122	-1.8096	0	0	0	4.83e-15	1.1423	1.0316	1.3293	0.8212	-0.140676	0.25621	0	0	-0.2485	0.1375
Smdt1	23.4343	324.797	13.395	0	29.5355	1681.08	53.6177	0	0.0412	21.8347	0.0674	0.0321	29.0064	0.0172	-0.3621	0.4098	-1.969	0	0	0	7.52e-07	0.8959	1.2545	0.9215	1.1099	-0.0277808	0.130282	0	0	-0.247245	0.283489
Sec11a	24.3481	335.136	9.0541	0	30.8105	1368.58	27.5094	0	0.027	22.6724	0.068	0.0201	30.1084	0.0221	-0.4284	0.4092	-1.6235	0	0	0	3.5e-05	0.6104	1.5971	0.6024	1.4587	0.0132802	0.094879	0	0	-0.246974	0.343284
Bloc1s2	25.7697	251.064	8.3362	0	31.6556	1479.05	28.7284	0	0.0332	23.3532	0.0933	0.0194	30.9736	0.021	-0.776	0.4074	-2.1487	0	0	0	2.6e-15	0.7743	1.4134	0.5999	1.4996	0.290715	-0.057482	0	0	-0.246029	0.71134
Rpl26	37.7339	2735.11	159.688	0	49.624	7325.42	380.999	0	0.0586	37.198	0.0136	0.0522	49.2506	0.0067	-0.1684	0.4049	-1.017	0	0	0	0	2.1747	0.5648	2.5549	0.4203	-0.148812	0.343802	0	0	-0.24472	0.122605
Tmsb10	25.2008	1596.83	88.0784	0	33.1885	2634.31	143.188	0	0.0551	24.8012	0.0156	0.0544	32.7574	0.0124	-0.0193	0.4014	-0.3258	9.13e-15	0	0	0	1.3693	1.0221	1.7785	0.7884	-0.230082	0.296423	0	0	-0.242883	0.0128676
Nucb1	26.3409	457.844	8.4579	0	33.7507	1150.19	14.4637	2.09e-25	0.0185	24.8978	0.0544	0.0126	32.7702	0.0285	-0.5524	0.3964	-0.9343	0	0	0	5.14e-06	0.4599	1.8742	0.4108	1.8221	0.119523	0.0285934	0	0	-0.24023	0.468254
Gltscr2	26.0139	287.698	9.8937	0	31.6959	2775.76	83.309	0	0.0343	23.8206	0.0831	0.03	31.3296	0.0113	-0.1929	0.3953	-2.8786	0	0	0	3.45e-13	0.8129	1.3223	0.944	1.0734	-0.138877	0.23188	0	0	-0.239677	0.143333
Nfyb	24.2989	188.085	1.8187	5.49e-12	28.535	3058.27	25.5891	6.15e-18	0.0097	21.5139	0.1145	0.0083	28.2542	0.0093	-0.2134	0.3932	-3.6247	0	0	0	2.94e-05	0.2075	2.9514	0.2367	2.5515	-0.123363	0.156731	0	0	-0.238559	0.168675
Bag1	24.9496	606.053	20.5321	0	32.5566	949.854	22.9005	0	0.0339	23.9496	0.0395	0.0241	31.4526	0.0332	-0.4917	0.3932	-0.2523	0	0	0	6.2e-08	0.8108	1.3236	0.7559	1.2524	0.0726287	0.0568508	0	0	-0.238549	0.406639
mt-Nd4	25.9864	208.256	8.738	0	30.8019	1728.53	46.0174	0	0.0419	23.0815	0.1113	0.0267	30.2515	0.0175	-0.6533	0.3903	-2.6684	0	0	0	7.27e-16	0.967	1.1844	0.8068	1.2354	0.198562	-0.0412822	0	0	-0.237013	0.569288
Psma3	22.9747	311.336	13.6396	0	29.8032	479.996	15.5554	0	0.0438	21.385	0.0691	0.0325	28.027	0.0583	-0.4301	0.3902	-0.2449	0	0	0	2.86e-07	0.9369	1.203	0.9005	1.1159	0.040422	0.0780536	0	0	-0.236986	0.347692
Trappc2l	25.4461	378.417	5.4732	0	33.2148	506.613	6.6554	0	0.0144	23.8114	0.0632	0.0131	31.148	0.0616	-0.1373	0.3875	-0.0368	0	0	6.47e-13	2.18e-05	0.3424	2.2118	0.408	1.8767	-0.160784	0.178558	0	0	-0.23554	0.0992366
Atp5h	27.2096	795.894	32.9732	0	34.7732	2965.4	102.121	0	0.0414	26.2889	0.0331	0.0344	34.3462	0.0116	-0.2692	0.3857	-1.5088	0	0	0	9.18e-09	1.0846	1.0683	1.1802	0.9032	-0.0810032	0.182795	0	0	-0.234591	0.203488
H2afj	28.8371	801.519	41.1385	0	36.8769	2626.09	116.597	0	0.0514	27.8169	0.0347	0.0446	36.3341	0.0138	-0.2047	0.3854	-1.3313	0	0	0	3.07e-10	1.422	0.8806	1.5992	0.7207	-0.110805	0.221868	0	0	-0.234413	0.152466
Lsm8	25.3537	132.687	2.3444	0	28.5951	932.516	14.4754	2.47e-25	0.0177	21.2549	0.1604	0.0155	27.7339	0.0297	-0.1857	0.3839	-2.4314	0	0	0	1.21e-05	0.374	2.1058	0.4305	1.7929	-0.131243	0.174522	0	0	-0.233613	0.141935
Evi2a	25.8616	400.888	3.1263	2.64e-15	31.9389	3557.9	27.5189	6.55e-20	0.0078	24.254	0.0608	0.0077	31.6381	0.0089	-0.0082	0.3834	-2.7693	3.91e-11	0	0	1.83e-05	0.1868	3.2366	0.2453	2.7	-0.238483	0.198741	0	0	-0.233393	0.012987
Sdhd	24.8093	739.779	25.3334	0	31.6739	2719.84	68.9854	0	0.0342	23.9922	0.0326	0.0253	31.2944	0.0115	-0.4331	0.3833	-1.4994	0	0	0	4.13e-07	0.8215	1.2991	0.7937	1.2017	0.0350258	0.0810518	0	0	-0.233339	0.351779
Tram1	26.6048	539.662	25.0654	0	33.5953	2086.07	77.1933	0	0.0464	25.3412	0.0471	0.037	33.0537	0.0159	-0.3273	0.3833	-1.5692	0	0	0	1.67e-08	1.1741	0.9925	1.2245	0.8571	-0.0411597	0.157975	0	0	-0.233332	0.254054
G3bp1	25.3651	234.105	4.8924	0	30.5281	1156.99	21.0796	0	0.0209	22.8586	0.0979	0.0183	29.7225	0.0257	-0.1929	0.3788	-1.9311	0	0	0	6.15e-06	0.4762	1.8073	0.5397	1.5462	-0.117658	0.168866	0	0	-0.230933	0.142077
Cyba	49.421	2438.55	160.886	0	63.4056	8790.43	491.251	0	0.0665	48.4054	0.0198	0.0561	62.9048	0.0071	-0.2451	0.378	-1.4734	0	0	0	0	3.1977	0.2887	3.5067	0.182	-0.088117	0.586264	0	0	-0.230498	0.185383
Gsto1	23.854	217.723	5.5112	0	28.9677	741.089	14.5835	0	0.0253	21.4705	0.0991	0.0197	27.859	0.0377	-0.3614	0.3758	-1.3953	0	0	0	0.0001	0.5416	1.767	0.5469	1.5879	-0.00969099	0.11279	0	0	-0.229315	0.284264
Sae1	27.6525	786.047	9.5946	3.34e-21	35.1505	2172.01	18.4493	9.59e-19	0.0122	26.6898	0.0342	0.0085	34.5735	0.0159	-0.5186	0.3734	-1.1022	0	0	0	1.33e-06	0.3249	2.2077	0.2936	2.1986	0.106608	0.004139	0	0	-0.228027	0.435294
Cycs	25.7455	906.11	41.0711	0	32.9307	1966.16	70.4691	0	0.0454	25.0129	0.0276	0.0359	32.3723	0.0165	-0.3387	0.3721	-0.746	0	0	0	1.53e-05	1.1291	1.0535	1.1615	0.9438	-0.027895	0.116232	0	0	-0.227336	0.264624
Spi1	31.2489	886.141	49.9422	0	39.3908	4515.06	213.418	0	0.0569	30.1561	0.034	0.0474	39.0192	0.0086	-0.266	0.3717	-1.9768	0	0	0	1.1e-09	1.6953	0.7258	1.8368	0.5728	-0.0770361	0.267109	0	0	-0.227147	0.200422
Anxa5	28.5122	1090.87	44.9383	0	36.2328	4444.75	149.685	0	0.0412	27.7712	0.0255	0.0336	35.9146	0.0081	-0.2965	0.371	-1.6475	0	0	0	7.6e-08	1.1415	1.0665	1.2063	0.9206	-0.053718	0.158484	0	0	-0.226743	0.22619
Sptlc2	28.9456	156.368	1.1643	1.81e-11	31.906	2823.21	25.2538	7.44e-15	0.0074	24.3836	0.1561	0.0089	31.5252	0.0112	0.2633	0.3706	-3.8003	0	0	0	1.74e-08	0.1804	3.1678	0.2813	2.2804	-0.358692	0.389142	0	0	-0.226536	-0.168539
Rpl35a	39.1395	2343.92	136.044	0	50.3207	4444.37	227.279	0	0.0582	38.4681	0.0164	0.0512	49.7217	0.0112	-0.1854	0.3702	-0.5513	0	0	0	0	2.2256	0.5167	2.5349	0.3935	-0.122017	0.313088	0	0	-0.226332	0.136719
Mrpl30	22.9802	291.02	6.7527	0	28.7411	633.088	12.5393	0	0.0232	21.2814	0.0734	0.0198	27.4694	0.0435	-0.2278	0.3682	-0.7561	0	0	0	2.62e-05	0.4922	1.8207	0.5419	1.5855	-0.0917143	0.148344	0	0	-0.225269	0.171717
Aldoa	31.6265	816.99	55.4861	0	39.7272	3429.63	209.973	0	0.0679	30.4247	0.0373	0.0612	39.258	0.0115	-0.1501	0.3677	-1.701	0	0	0	0	2.0573	0.5931	2.4075	0.4283	-0.145462	0.384777	0	0	-0.225006	0.109477
Rnf130	26.002	427.644	13.9848	0	32.2155	1727.01	49.7847	0	0.0328	24.4949	0.0572	0.0288	31.602	0.0183	-0.188	0.3675	-1.6424	0	0	0	1.34e-09	0.798	1.325	0.9061	1.1153	-0.119303	0.188021	0	0	-0.224894	0.138889
Csnk1a1	27.4364	986.242	21.3815	0	35.0429	1820	30.2463	0	0.0217	26.6767	0.0271	0.0166	34.3594	0.0189	-0.3837	0.3651	-0.5191	0	0	0	0.000142	0.5753	1.6372	0.5692	1.514	0.0107168	0.0813738	0	0	-0.223598	0.307229
Ndufb7	27.4635	603.159	28.0892	0	34.5071	1677.01	64.7319	0	0.0469	26.2488	0.0434	0.0387	33.7946	0.0202	-0.2765	0.3645	-1.1065	0	0	0	2.41e-09	1.2179	0.9678	1.3072	0.8156	-0.068314	0.186611	0	0	-0.223284	0.211886
Sepw1	22.4246	379.683	10.9267	0	28.0997	850.763	13.4198	0	0.0287	21.1465	0.0559	0.0158	27.1884	0.032	-0.8657	0.3626	-0.8058	0	0	0	3.06e-17	0.6036	1.6929	0.4291	1.9176	0.406665	-0.117178	0	0	-0.222223	0.816456
Aprt	31.5435	689.227	32.8824	0	39.1825	3346.92	145.606	0	0.0477	30.1323	0.0438	0.0436	38.7052	0.0116	-0.1294	0.3612	-1.9214	0	0	0	1.28e-21	1.4283	0.8777	1.6878	0.6549	-0.15375	0.340205	0	0	-0.221492	0.0940367
Eif3h	27.9224	431.032	20.505	0	34.1443	2319.55	96.4628	0	0.0476	26.203	0.061	0.0418	33.6285	0.0145	-0.1857	0.36	-2.0753	0	0	0	3.44e-12	1.2424	0.9638	1.397	0.7785	-0.110666	0.238022	0	0	-0.22081	0.138756
Nono	24.8535	668.376	12.6416	0	31.1051	2579.65	39.1513	2.03e-26	0.0189	23.9439	0.0358	0.0152	30.7116	0.0119	-0.3181	0.3591	-1.5876	0	0	0	0.000126	0.4504	1.8579	0.4648	1.6745	-0.0309811	0.109525	0	0	-0.220363	0.243421
Rer1	24.5952	266.494	8.4357	0	30.3537	581.137	15.7734	0	0.0316	22.4904	0.0851	0.0271	28.818	0.0497	-0.2201	0.3577	-0.7765	0	0	0	1.48e-07	0.71	1.4321	0.7764	1.2286	-0.0855229	0.165636	0	0	-0.219571	0.166052
Rsl24d1	27.278	202.587	4.1029	0	31.3687	1627.75	27.3345	0	0.0203	24.0249	0.1187	0.0168	30.7593	0.0189	-0.2708	0.3565	-2.6489	0	0	0	4.86e-05	0.4863	1.8052	0.5167	1.587	-0.0588349	0.137492	0	0	-0.218939	0.208333
Cops6	25.3802	190.453	5.2575	0	28.9098	3366.53	72.8891	0	0.0277	22.3956	0.1177	0.0217	28.6492	0.0085	-0.3532	0.3553	-3.7886	0	0	0	3.64e-05	0.6184	1.5741	0.6193	1.4333	-0.00145325	0.0982348	0	0	-0.218282	0.276498
Actg1	34.9882	1960.92	119.435	0	44.8408	2167.24	128.553	0	0.061	34.3627	0.0175	0.0594	43.9094	0.0202	-0.038	0.3537	0.2085	4.19e-21	0	0	0	2.0997	0.5761	2.6017	0.3731	-0.192951	0.54409	0	0	-0.217418	0.026936
Cdc42	30.3295	680.555	41.189	0	37.8796	1764.77	90.3951	0	0.0606	29.0168	0.0427	0.0512	37.065	0.0211	-0.2429	0.3532	-1.019	0	0	0	9.24e-08	1.753	0.6784	1.8951	0.5448	-0.0749829	0.245228	0	0	-0.217137	0.183594
Gabarap	28.6833	2238.89	103.001	0	36.5304	3456.53	134.074	0	0.046	28.3073	0.0127	0.0389	36.1167	0.0104	-0.2428	0.3515	-0.2784	0	0	0	1.44e-09	1.3031	0.9276	1.395	0.7786	-0.0658781	0.191369	0	0	-0.216227	0.182519
Ndufb9	25.3578	323.246	10.4327	0	30.6223	1432.21	42.3235	0	0.0323	23.4856	0.0728	0.0296	29.9616	0.0209	-0.1232	0.3513	-1.8017	0	0	0	2.69e-11	0.7551	1.3911	0.8842	1.1455	-0.146008	0.214404	0	0	-0.216143	0.0912162
Rcsd1	26.2978	531.689	5.4766	1.31e-19	32.1887	4363.92	42.5249	1.44e-25	0.0103	25.0436	0.0471	0.0097	31.9282	0.0073	-0.083	0.3504	-2.6832	3e-24	0	0	1.34e-05	0.257	2.6294	0.3102	2.1693	-0.171502	0.212096	0	0	-0.215628	0.0618557
Emg1	24.4123	358.939	10.7236	0	29.5656	1890.95	44.7845	0	0.0299	22.8413	0.064	0.0236	29.0972	0.0155	-0.3375	0.3492	-2.0464	0	0	0	0.000128	0.681	1.5029	0.6876	1.3661	-0.0095986	0.100139	0	0	-0.215	0.266949
Anp32b	26.2724	198.872	10.3572	0	30.3391	1165.72	45.8299	0	0.0525	23.1933	0.1164	0.0392	29.5439	0.0254	-0.4194	0.3492	-2.1936	0	0	0	2.01e-05	1.2038	0.9991	1.1551	0.9769	0.0421609	0.0227249	0	0	-0.214955	0.339286
Rap1b	29.9641	893.127	43.4133	0	37.3044	3419.36	149.825	0	0.0486	28.9721	0.0325	0.0438	36.884	0.0108	-0.1493	0.3483	-1.5881	0	0	0	2.22e-14	1.4053	0.8546	1.621	0.6734	-0.133066	0.269082	0	0	-0.214508	0.109589
Ociad1	25.4835	428.577	7.3817	0	31.0622	2063.94	30.9629	0	0.0172	24.0311	0.0564	0.015	30.5815	0.0148	-0.1921	0.3478	-1.9307	0	0	0	5.95e-06	0.4126	2.0193	0.4582	1.7165	-0.0995199	0.176405	0	0	-0.214195	0.146667
Ostc	27.2355	585.977	17.5952	0	33.686	1841.5	45.8088	0	0.0301	26.0238	0.0445	0.0249	33.0746	0.018	-0.2734	0.3459	-1.3072	0	0	0	5.13e-06	0.7819	1.3665	0.8254	1.2001	-0.0527017	0.138655	0	0	-0.213179	0.208835
Uqcrb	24.6974	845.676	17.0518	0	31.0624	1567.86	29.8852	0	0.0201	23.9718	0.0287	0.0191	30.4419	0.0194	-0.0741	0.3447	-0.5634	0	0	0	2.24e-07	0.4798	1.883	0.5791	1.5631	-0.171473	0.204657	0	0	-0.212539	0.052356
Hbp1	23.8604	188.94	2.9511	0	27.4373	1267.14	12.5533	5.73e-19	0.0156	21.1503	0.112	0.0099	26.8325	0.0212	-0.6591	0.3433	-2.3993	0	0	0	1.99e-08	0.3278	2.3927	0.264	2.4509	0.241667	-0.0237464	0	0	-0.211766	0.575758
Ptrhd1	25.63	516.479	6.0446	1.61e-20	31.6154	1524	13.7121	5.47e-17	0.0117	24.4044	0.0473	0.009	30.9603	0.0203	-0.378	0.3433	-1.2193	0	0	0	2.21e-05	0.2839	2.5065	0.2794	2.3403	0.0161059	0.0710165	0	0	-0.211752	0.3
Use1	26.4544	211.339	4.2385	0	30.1678	2192.42	47.4418	0	0.02	23.4823	0.1115	0.0216	29.7468	0.0136	0.1097	0.3412	-3.0339	0	0	0	4.36e-18	0.4685	1.9018	0.6436	1.4298	-0.272063	0.330116	0	0	-0.210594	-0.0740741
Ndufb3	25.638	319.923	8.298	0	31.1921	818.268	19.2595	0	0.0259	23.7095	0.0747	0.0236	30.0214	0.0367	-0.1356	0.3405	-1.0242	0	0	0	1.61e-09	0.612	1.575	0.7011	1.3087	-0.127086	0.203484	0	0	-0.210247	0.0974576
Atp5f1	29.0731	1308.3	69.2954	0	36.3819	3406.81	140.51	0	0.0529	28.4244	0.0218	0.0414	35.9663	0.0105	-0.3557	0.3395	-1.0487	0	0	0	1.88e-10	1.5033	0.8023	1.4713	0.737	0.0217495	0.0886024	0	0	-0.209694	0.277778
Rpl37a	38.7349	869.614	57.7649	0	47.358	4461.61	277.793	0	0.0667	37.0608	0.0426	0.0627	46.8232	0.0105	-0.0897	0.3373	-2.0242	1.27e-25	0	0	0	2.4579	0.4488	2.9064	0.3111	-0.154315	0.442623	0	0	-0.208495	0.0637959
Vps4b	26.711	459.701	3.2124	6.38e-13	32.0771	3806.3	32.5546	1.72e-15	0.007	25.2104	0.0555	0.0085	31.7933	0.0084	0.293	0.3347	-2.7209	0	0	0	6.72e-08	0.1749	3.1958	0.2725	2.3184	-0.358165	0.378451	0	0	-0.207053	-0.176471
Vmp1	25.2743	212.073	3.2552	0	29.022	1428.63	17.4634	2.81e-23	0.0153	22.5499	0.1067	0.0123	28.4316	0.0199	-0.3224	0.3344	-2.4241	0	0	0	0.00012	0.344	2.2076	0.3482	2.0377	-0.012062	0.0833783	0	0	-0.206872	0.243902
Uba2	25.5562	528.295	9.8177	0	31.4105	1374.19	19.9707	0	0.0186	24.347	0.0461	0.0146	30.6906	0.0223	-0.3488	0.3341	-1.0496	0	0	0	0.000109	0.4473	1.8713	0.4457	1.7029	0.00358986	0.0988901	0	0	-0.206695	0.273973
Hadhb	26.5853	994.078	13.5154	3.42e-25	33.1844	1897	21.1943	5.46e-22	0.0136	25.8654	0.0262	0.0112	32.597	0.0172	-0.2771	0.3337	-0.6058	0	0	0	7.29e-05	0.3482	2.1975	0.3649	1.9337	-0.045766	0.136422	0	0	-0.20651	0.214286
Ndufa7	26.4855	303.634	10.8462	0	31.229	1593.08	49.9346	0	0.0356	24.3258	0.081	0.0313	30.6101	0.0192	-0.1857	0.3315	-2.0726	0	0	0	1.54e-10	0.8665	1.2518	0.9573	1.0473	-0.0948501	0.195264	0	0	-0.205302	0.13738
Trem3	23.0635	212.282	10.2204	0	27.4737	517.019	24.6159	0	0.0479	20.7284	0.0994	0.0477	26.0806	0.0505	-0.0057	0.3314	-0.9769	1.45e-05	0	0	1.51e-21	0.9883	1.1904	1.2429	0.9321	-0.204844	0.277116	0	0	-0.205218	0.00419287
Gm6133	26.7913	420.297	11.4258	0	33.7533	500.975	10.4595	0	0.0271	25.1425	0.0603	0.0209	31.5996	0.0631	-0.3734	0.3298	0.0645	0	0	2.07e-17	1.89e-05	0.6777	1.4262	0.6568	1.339	0.031821	0.0651232	0	0	-0.204341	0.296651
Sh3bgrl	24.8803	159.711	3.2717	0	27.9718	771.769	9.2795	1.46e-19	0.0205	21.5074	0.1348	0.012	26.9787	0.035	-0.7666	0.327	-1.9471	0	0	0	9.35e-13	0.4393	1.9267	0.3232	2.1107	0.35922	-0.0871749	0	0	-0.202801	0.708333
Ubald2	24.9706	433.584	15.1062	0	30.2546	1314.94	33.4515	0	0.0348	23.5871	0.0545	0.0254	29.5529	0.0226	-0.4545	0.3253	-1.2712	0	0	0	1.64e-07	0.8184	1.3276	0.7498	1.2721	0.0914911	0.0436286	0	0	-0.201869	0.370079
Gm6563	26.7672	626.263	10.5033	0	33.0451	1138.98	14.8436	8.68e-26	0.0168	25.6446	0.041	0.0131	32.0963	0.0281	-0.3589	0.3238	-0.5431	0	0	0	6.54e-05	0.429	1.8832	0.4182	1.7527	0.025825	0.0744566	0	0	-0.201011	0.282443
Tbpl1	26.0408	270.437	2.6116	1.57e-12	30.2623	1640.72	14.0858	9.98e-14	0.0097	23.7271	0.0879	0.0086	29.6882	0.018	-0.1614	0.3234	-2.2837	0	0	0	3.54e-05	0.2274	2.858	0.2538	2.4967	-0.104019	0.144711	0	0	-0.20079	0.127907
Ncl	25.8736	380.467	8.8533	0	30.8739	1635.33	43.1341	0	0.0233	24.2049	0.0636	0.0264	30.2843	0.0185	0.1798	0.3233	-1.7795	0	0	0	1.8e-24	0.56	1.6718	0.7972	1.2488	-0.297541	0.338725	0	0	-0.200744	-0.117424
Rab2a	25.2931	260.336	13.1611	0	30.0976	679.741	27.8409	0	0.0506	23.049	0.0886	0.0411	28.8002	0.0423	-0.2978	0.3214	-1.0666	0	0	0	1.04e-08	1.1637	1.0246	1.1765	0.9091	-0.0108797	0.127049	0	0	-0.199693	0.231144
Zdhhc20	28.7001	315.044	2.4046	3.53e-13	33.4703	1646.78	14.3578	1.16e-16	0.0076	26.2681	0.0836	0.0087	32.7909	0.0199	0.1954	0.32	-2.0702	0	0	0	2.1e-07	0.1987	3.0304	0.2862	2.2678	-0.30573	0.336273	0	0	-0.198921	-0.126437
Ddx39b	27.2743	424.831	11.8027	0	32.3484	2514.56	54.9403	0	0.0278	25.6135	0.0604	0.0218	31.9176	0.0128	-0.3492	0.3175	-2.2415	0	0	0	1.02e-05	0.7093	1.4241	0.6968	1.311	0.0179392	0.08627	0	0	-0.197512	0.275229
Cript	27.4646	204.102	3.8302	0	30.6835	1728.02	28.0523	0	0.0188	24.1874	0.1184	0.0162	30.1386	0.0174	-0.2127	0.3174	-2.763	0	0	0	5.96e-05	0.4526	1.9178	0.4912	1.6836	-0.0785831	0.139107	0	0	-0.197461	0.160494
Limd2	28.4598	1264.6	76.9307	0	35.2791	1946.82	114.925	0	0.0608	27.8234	0.022	0.0593	34.628	0.0178	-0.0376	0.3156	-0.3101	9.73e-14	0	0	0	1.6917	0.742	2.043	0.531	-0.171953	0.397363	0	0	-0.196506	0.0252951
Atp6v1g1	27.5589	762.657	34.6895	0	33.3986	3693.95	136.977	0	0.0455	26.579	0.0349	0.037	33.069	0.009	-0.2975	0.3152	-1.958	0	0	0	2.17e-05	1.2056	0.9904	1.222	0.9028	-0.0134206	0.0970315	0	0	-0.196256	0.22973
Ptpre	27.1358	197.212	2.4149	3.44e-26	29.9511	2956.32	42.6655	0	0.0123	23.8352	0.1208	0.0144	29.6337	0.0101	0.2292	0.3141	-3.5775	0	0	0	2.95e-10	0.2913	2.4975	0.4273	1.8914	-0.318278	0.32045	0	0	-0.195672	-0.145833
Rpl11	44.662	2684.94	159.732	0	55.0641	6404.99	332.191	0	0.0597	43.9042	0.0163	0.052	54.5666	0.0085	-0.2004	0.3137	-0.9402	0	0	0	7.77e-22	2.6097	0.4315	2.8357	0.3601	-0.0796981	0.198278	0	0	-0.195402	0.148077
Pdap1	25.666	412.754	4.0367	2.36e-15	30.3988	2483.24	23.2943	6.13e-18	0.0098	24.1541	0.0585	0.0094	30.0196	0.0121	-0.064	0.3136	-2.2693	0	0	0	4.88e-05	0.2358	2.7081	0.2814	2.3014	-0.162047	0.176719	0	0	-0.195389	0.0425532
Prdx5	45.3272	3362.51	216.654	0	56.1699	5570.09	320.812	0	0.0644	44.7183	0.0133	0.0577	55.5649	0.01	-0.1596	0.3133	-0.4168	0	0	0	1.23e-22	2.8887	0.3859	3.1861	0.2628	-0.093343	0.468417	0	0	-0.195206	0.116118
Rpl37	33.5011	974.537	64.2464	0	41.4277	1378.61	84.6747	0	0.0661	32.3548	0.0332	0.0616	40.1883	0.0291	-0.1026	0.3128	-0.188	5.29e-20	0	0	0	2.1186	0.5598	2.4598	0.4189	-0.13871	0.336357	0	0	-0.19492	0.0730519
Pgp	25.5	308.721	7.4382	0	30.3301	823.161	19.1144	0	0.0241	23.5413	0.0765	0.0233	29.2404	0.0355	-0.0506	0.3128	-1.1067	0	0	0	1.02e-08	0.5666	1.6717	0.6798	1.3893	-0.16652	0.203268	0	0	-0.194905	0.0343348
Zfp706	27.8688	1985.2	94.4832	0	34.593	2450.18	76.4247	0	0.0473	27.4573	0.0141	0.0313	34.0912	0.0139	-0.5963	0.3122	-0.0199	0	0	0	0	1.2999	0.9446	1.0636	1.0108	0.22217	-0.0654927	0	0	-0.194593	0.511182
Celf2	24.658	295.28	7.3967	0	29.1555	841.313	19.6178	0	0.025	22.7055	0.0772	0.0233	28.1619	0.0336	-0.1018	0.3107	-1.1999	2.06e-15	0	0	6.22e-08	0.5596	1.6661	0.6561	1.394	-0.147081	0.195194	0	0	-0.193751	0.0729614
Psme1	24.0795	278.783	10.5288	0	28.7613	607.92	17.3113	0	0.0378	22.149	0.0801	0.0286	27.451	0.0451	-0.4014	0.3096	-0.8285	0	0	0	1.35e-06	0.837	1.2982	0.7819	1.2345	0.0704694	0.0515998	0	0	-0.193144	0.321678
Nrm	23.7107	512.198	9.7962	0	30.0419	428.666	5.4152	1.81e-23	0.0191	22.6508	0.0443	0.0127	28.057	0.0654	-0.5962	0.3088	0.5633	0	0	0	2.09e-08	0.4327	1.9892	0.3531	2.0468	0.225432	-0.0281415	0	0	-0.192686	0.503937
Anxa1	25.0779	1051.84	73.6625	0	31.5637	777.516	58.5686	0	0.0699	24.4831	0.0235	0.0756	30.3151	0.039	0.1117	0.3083	0.732	0	0	0	0	1.7144	0.8946	2.2839	0.6516	-0.249354	0.372928	0	0	-0.192379	-0.0753968
Eif3e	25.9933	739.912	27.9311	0	31.795	1368.57	47.1381	0	0.0377	25.098	0.034	0.0344	31.0626	0.0227	-0.1321	0.3076	-0.5804	0	0	0	1.72e-10	0.9473	1.1939	1.0682	0.9911	-0.113181	0.204621	0	0	-0.192019	0.0959302
Tmem167	28.1683	400.498	5.8074	0	33.1796	1785.88	22.7698	3.59e-27	0.0145	26.3007	0.0657	0.0128	32.55	0.0182	-0.184	0.3076	-1.8503	0	0	0	0.000115	0.3807	2.0882	0.4139	1.8389	-0.0802126	0.13557	0	0	-0.191991	0.132812
Rpsa	35.6357	1967.24	121.073	0	44.0232	2643.15	160.485	0	0.0619	34.9739	0.0177	0.0608	43.2746	0.0164	-0.0262	0.3072	-0.1157	1.92e-13	0	0	0	2.1462	0.5792	2.6233	0.4186	-0.18187	0.38366	0	0	-0.191815	0.0180921
Rrs1	29.023	341.751	2.3597	1.15e-11	33.3895	3791.81	25.1783	3.31e-11	0.0069	26.736	0.0782	0.0066	33.0802	0.0087	-0.0606	0.3072	-3.1612	7.37e-11	0	0	2.56e-05	0.1841	3.0391	0.22	2.5352	-0.163182	0.198761	0	0	-0.191782	0.0454545
Arpc5	34.1503	1190.27	68.3228	0	41.5018	3737.74	192.697	0	0.0574	33.1733	0.0279	0.0518	41.0155	0.011	-0.1483	0.3061	-1.3484	0	0	0	6.08e-11	1.8936	0.6127	2.1118	0.4841	-0.103324	0.265648	0	0	-0.191201	0.108108
Acaa1a	26.2168	695.451	5.8247	1.12e-15	31.6066	2535.46	21.8413	1.7e-16	0.0084	25.2515	0.0365	0.0086	31.1949	0.0123	0.0459	0.3049	-1.5692	1.5e-24	0	0	1.81e-05	0.2116	2.9403	0.2694	2.4008	-0.214551	0.224717	0	0	-0.190525	-0.0232558
Ugp2	25.9022	176.377	3.2786	0	28.4754	1293.72	25.7598	0	0.0186	22.568	0.1282	0.0199	27.8385	0.0216	0.0976	0.3028	-2.5697	0	0	0	3.26e-12	0.4185	1.9624	0.5507	1.536	-0.240058	0.277604	0	0	-0.189324	-0.0653266
Cdkn3	27.3652	337.193	2.8116	1.36e-13	31.5766	2492.5	17.4833	3.82e-11	0.0084	25.2851	0.0749	0.007	31.1704	0.0125	-0.2533	0.3019	-2.5805	0	0	0	8.54e-06	0.2092	2.9509	0.2192	2.7053	-0.0456204	0.0907848	0	0	-0.188811	0.2
Bola3	26.1102	246.61	2.621	1.09e-17	30.0035	963.899	7.2612	5.11e-12	0.0106	23.5833	0.0958	0.0075	29.0696	0.0303	-0.4981	0.3017	-1.6619	0	0	0	1.56e-07	0.2487	2.5725	0.2174	2.5834	0.143974	-0.00421925	0	0	-0.18873	0.413333
Echs1	23.7535	288.868	8.9414	0	27.9937	766.976	19.1346	0	0.0309	21.9098	0.0768	0.0249	26.994	0.0354	-0.3086	0.3011	-1.1187	0	0	0	2.34e-05	0.6751	1.497	0.6723	1.3687	0.00416481	0.0937386	0	0	-0.188346	0.240964
Psma5	26.4677	210.452	5.12	0	29.5664	1399.49	36.9782	0	0.0243	23.4827	0.1117	0.0264	28.9316	0.0207	0.1179	0.3011	-2.4304	0	0	0	5.57e-21	0.5688	1.6443	0.7613	1.2438	-0.252857	0.321997	0	0	-0.188337	-0.0795455
Capza2	29.1076	1090.65	45.8987	0	35.2879	3147.15	125.226	0	0.0421	28.3278	0.026	0.0399	34.8721	0.0111	-0.0767	0.2999	-1.2335	1.86e-23	0	0	2.01e-17	1.1891	0.9789	1.3859	0.7581	-0.142002	0.291254	0	0	-0.187666	0.0551378
Gsn	24.916	448.687	17.7109	0	29.7562	1206.46	35.8673	0	0.0395	23.5942	0.0528	0.0297	29.0171	0.0241	-0.4106	0.2985	-1.1306	0	0	0	4.76e-06	0.9325	1.2197	0.8607	1.2354	0.0834205	-0.0127084	0	0	-0.186886	0.329966
Lbr	27.7428	878.863	29.1517	0	33.6261	1871.11	67.4029	0	0.0333	26.8779	0.0306	0.0361	33.0229	0.0177	0.115	0.297	-0.792	0	0	0	0	0.8934	1.2105	1.1927	0.8841	-0.250943	0.369189	0	0	-0.186083	-0.0775623
Pdcd10	24.553	744.33	20.2066	0	29.877	1213.3	28.1888	0	0.0271	23.7523	0.032	0.0232	29.1423	0.0241	-0.2244	0.295	-0.408	0	0	0	5.55e-06	0.6434	1.5516	0.6751	1.3561	-0.046956	0.144163	0	0	-0.184955	0.168103
Sf3b4	24.9905	336.879	6.6943	0	30.1845	523.289	6.9716	0	0.0199	23.2484	0.0691	0.0133	28.5135	0.0546	-0.5773	0.2945	-0.3401	0	0	0	4.7e-09	0.4603	1.8503	0.3785	1.9309	0.216116	-0.0417422	0	0	-0.184653	0.496241
Vdac2	26.7378	620.196	31.9291	0	31.8223	2367.72	92.8718	0	0.0513	25.5988	0.0418	0.0393	31.3821	0.0132	-0.3832	0.2939	-1.6563	0	0	0	8.81e-15	1.3095	0.9117	1.2271	0.8633	0.0671502	0.0560639	0	0	-0.184287	0.305344
Nsa2	26.7991	423.044	3.3874	1.34e-15	31.9728	892.558	7.9833	1.81e-16	0.008	25.1681	0.0601	0.009	30.8502	0.0346	0.1625	0.2937	-0.7976	0	0	0	1.36e-06	0.2007	3.0352	0.2757	2.3347	-0.272035	0.300039	0	0	-0.184184	-0.111111
Uqcr10	30.8279	712.252	21.7917	0	36.4825	4802.13	135.879	0	0.0306	29.5243	0.0414	0.0283	36.1837	0.0076	-0.1165	0.2934	-2.4556	0	0	0	2.13e-11	0.8987	1.2073	1.0231	0.9976	-0.121591	0.210204	0	0	-0.184044	0.0812721
Rad23a	24.9383	372.402	3.9612	1.87e-17	28.966	2449.07	20.1171	3.85e-11	0.0107	23.3573	0.0627	0.0082	28.6137	0.0117	-0.375	0.2928	-2.4245	0	0	0	4.37e-06	0.2478	2.5971	0.2352	2.4884	0.0535714	0.0436827	0	0	-0.183702	0.304878
Atp5d	25.6347	713.806	25.3252	0	31.4468	830.449	25.4795	0	0.0354	24.7245	0.0347	0.0307	30.2812	0.0365	-0.2072	0.2925	0.0725	0	0	3e-13	4.22e-08	0.8718	1.2773	0.9282	1.0936	-0.0607628	0.167977	0	0	-0.183503	0.153094
Pigk	25.801	301.53	2.809	6.89e-14	29.8514	1153.83	7.6897	3e-12	0.0093	23.7472	0.0789	0.0067	29.0797	0.0252	-0.4818	0.2923	-1.6438	0	0	0	1.96e-07	0.2198	2.8321	0.1929	2.7956	0.13945	0.0130562	0	0	-0.183375	0.38806
S100a9	10.7536	147.625	45.9611	0	13.4615	122.961	36.3176	0	0.3249	9.8465	0.086	0.2992	12.0504	0.1053	-0.1187	0.2914	0.2923	0	0	0	0	3.1703	0.7243	3.5935	0.6574	-0.117768	0.101765	0	0	-0.18289	0.0858957
Ucp2	24.5835	428.731	10.2474	0	28.981	1575.33	43.4243	0	0.0239	23.2421	0.0544	0.0276	28.4427	0.0181	0.2062	0.2913	-1.5865	0	0	0	1.81e-25	0.5558	1.7005	0.7816	1.2572	-0.288895	0.352609	0	0	-0.182845	-0.134058
Serpinb1a	32.3111	1019.96	69.9117	0	38.7925	3141.41	196.043	0	0.0685	31.2929	0.0307	0.0628	38.2931	0.0122	-0.1247	0.2913	-1.3367	0	0	0	6.38e-14	2.1361	0.6885	2.3874	0.5749	-0.105261	0.1976	0	0	-0.182806	0.0907643
Anp32a	25.8167	344.87	13.3434	0	30.2447	1027.7	35.3374	0	0.0388	24.0107	0.0696	0.0344	29.3669	0.0286	-0.1732	0.2905	-1.2827	0	0	0	7.16e-09	0.9282	1.1861	1.0089	1.0093	-0.0799881	0.175171	0	0	-0.182389	0.127907
Rpl27-ps3	26.0265	357.997	13.2643	0	30.2756	1453.87	50.9969	0	0.037	24.236	0.068	0.0352	29.6416	0.0204	-0.0734	0.2905	-1.7386	0	0	0	3.3e-12	0.8932	1.178	1.0413	0.9622	-0.142226	0.224278	0	0	-0.182365	0.0511364
Dera	26.7689	1112.24	7.9078	1.07e-09	32.3011	3033.4	24.6927	3.75e-15	0.0071	26.123	0.0235	0.0082	31.9424	0.0105	0.1992	0.2902	-1.1596	0	0	0	1.86e-06	0.1851	3.0621	0.2604	2.3594	-0.289171	0.29783	0	0	-0.182184	-0.134146
Srp68	28.2881	595.37	4.6256	1.03e-13	33.222	5348.79	27.1957	6.91e-07	0.0078	26.9943	0.0454	0.0051	32.9973	0.0062	-0.6113	0.2897	-2.8781	0	0	0	8.62e-09	0.209	2.8668	0.1687	2.9471	0.238886	-0.0272471	0	0	-0.181924	0.529412
Ppp1r2	25.2365	322.308	7.1369	0	29.025	2016.73	41.7568	0	0.0222	23.3958	0.0727	0.0207	28.5984	0.0142	-0.0959	0.2897	-2.3586	0	0	0	7.17e-07	0.5186	1.7317	0.5932	1.4683	-0.125759	0.179391	0	0	-0.181919	0.0724638
Cox6b1	28.0601	1689.55	72.611	0	34.2036	2378.02	96.8654	0	0.043	27.5735	0.0163	0.0408	33.7006	0.0142	-0.0762	0.2895	-0.2059	2.85e-23	0	0	6.91e-15	1.1728	0.9794	1.3694	0.776	-0.143567	0.262113	0	0	-0.18181	0.0539216
Prdx2	25.833	406.674	8.3091	0	30.0276	2350.44	31.6493	0	0.0204	24.2584	0.06	0.0135	29.6402	0.0127	-0.5994	0.2891	-2.2426	0	0	0	6.55e-09	0.4932	1.8364	0.4	1.9016	0.233	-0.0342869	0	0	-0.181571	0.511111
Tbc1d10c	27.909	2099.28	17.166	4.2e-17	34.0638	2727.47	18.842	1.78e-16	0.0082	27.5277	0.0131	0.0069	33.6287	0.0123	-0.2418	0.2888	-0.0896	0	0	0	9.62e-06	0.2243	2.9178	0.2333	2.6566	-0.0385769	0.0983212	0	0	-0.181422	0.188406
Cox7a2l	24.295	360.024	13.207	0	28.2462	1788.8	55.0552	0	0.0367	22.7464	0.0632	0.0308	27.7861	0.0155	-0.2529	0.2887	-2.0247	0	0	0	6.05e-05	0.8331	1.3302	0.8495	1.2046	-0.0193055	0.104267	0	0	-0.181375	0.191558
Prdx1	23.6482	269.663	11.6844	0	26.9005	1940.82	70.7483	0	0.0433	21.7214	0.0809	0.0365	26.5301	0.0137	-0.2473	0.2885	-2.5609	0	0	0	8.8e-06	0.9384	1.3059	0.97	1.1654	-0.0325773	0.120559	0	0	-0.181254	0.186301
Rgs18	27.4817	912.569	11.4967	0	33.9387	815.914	11.6638	0	0.0126	26.6581	0.0293	0.0143	32.5513	0.0399	0.1845	0.2881	0.4468	0	0	0	3.54e-11	0.3338	2.2948	0.4636	1.7552	-0.279983	0.307429	0	0	-0.181043	-0.118881
Mrps30	25.9455	377.103	5.0467	1.56e-16	30.7776	810.668	7.1339	4.96e-17	0.0134	24.2701	0.0644	0.0089	29.6332	0.0365	-0.6029	0.288	-0.8191	0	0	0	8.73e-09	0.325	2.2932	0.2603	2.3925	0.248559	-0.0415047	0	0	-0.180983	0.505618
Gnpnat1	26.4185	465.579	3.6392	4.18e-12	30.724	4417.66	30.5989	6.49e-09	0.0078	24.9874	0.0536	0.0069	30.4976	0.0069	-0.181	0.2875	-2.9499	0	0	0	2.03e-05	0.195	2.975	0.2115	2.6144	-0.0780142	0.137928	0	0	-0.180677	0.130435
Gstp1	29.1421	262.779	5.0356	0	33.0209	1050.86	13.9991	0	0.0192	26.215	0.0998	0.0133	31.9916	0.0305	-0.5263	0.2873	-1.7118	0	0	0	2.6e-08	0.5018	1.7389	0.4252	1.7736	0.180151	-0.0195647	0	0	-0.180566	0.443609
Mrpl41	28.7952	205.918	1.8246	8.87e-17	31.1124	3235.81	28.5243	1.2e-16	0.0089	25.2429	0.1225	0.0088	30.8	0.0095	-0.0076	0.2871	-3.6866	7.61e-07	0	0	2.32e-05	0.2232	2.8028	0.2719	2.3114	-0.17911	0.212598	0	0	-0.180425	0.0113636
Naca	33.7499	1560.54	104.804	0	40.9681	2477.09	138.59	0	0.0673	33.0159	0.0211	0.0562	40.2698	0.0162	-0.2592	0.2865	-0.3821	0	0	0	0.0678	2.2163	0.5412	2.2464	0.4939	-0.0133992	0.0957684	0	0	-0.180133	0.197509
Maf1	27.2864	858.03	14.4076	0	33.1882	1150.02	16.7938	0	0.0168	26.4287	0.0309	0.0146	32.2313	0.028	-0.1981	0.2864	-0.1394	0	0	0	2.72e-05	0.4421	1.9782	0.4677	1.7277	-0.0547359	0.14499	0	0	-0.18003	0.150685
Cggbp1	24.8942	654.059	12.5354	0	30.1102	1021.91	15.2332	0	0.0191	23.9637	0.0369	0.0149	29.2236	0.0287	-0.3615	0.2863	-0.3627	0	0	0	4.26e-05	0.458	1.9075	0.4333	1.794	0.0570044	0.0632664	0	0	-0.179988	0.281879
Dctn3	26.443	271.678	8.3258	0	29.8086	1943.15	45.3421	0	0.0306	24.0688	0.0888	0.0234	29.341	0.0151	-0.388	0.2858	-2.5579	0	0	0	1.83e-06	0.7335	1.4317	0.6804	1.3582	0.0780423	0.0541157	0	0	-0.179687	0.307692
Tmem242	26.3147	176.271	1.5246	8.04e-13	29.7346	440.134	3.2036	6.05e-11	0.0086	22.8489	0.1306	0.0073	27.8306	0.0632	-0.2438	0.2845	-1.0471	0	0	0	8.04e-06	0.1962	3.043	0.2015	2.7363	-0.0263027	0.112086	0	0	-0.179001	0.178082
Map1lc3b	26.4474	1193.12	54.0262	0	32.1411	1628.81	60.5897	0	0.0453	25.8608	0.0217	0.0372	31.4972	0.0194	-0.2851	0.2845	-0.1639	0	0	0	2.39e-06	1.1717	1.0206	1.1656	0.9461	0.00523336	0.0787443	0	0	-0.178949	0.217742
Swi5	26.9179	530.206	21.1837	0	31.4968	3129.58	97.8866	0	0.0399	25.5968	0.0484	0.0313	31.1738	0.01	-0.3512	0.2844	-2.2792	0	0	0	4.74e-08	1.0199	1.1408	0.9765	1.0675	0.0444444	0.0686651	0	0	-0.1789	0.27476
Timm17a	25.6762	1942.17	36.7656	0	31.4036	1808.96	21.9836	5.39e-25	0.0189	25.3333	0.0132	0.0121	30.8478	0.0171	-0.6387	0.2841	0.376	0	0	0	2.89e-11	0.4811	1.8152	0.3742	1.9379	0.285676	-0.063316	0	0	-0.178765	0.561983
Id2	24.4985	494.21	27.1668	0	29.3899	849.251	42.0269	0	0.0549	23.3202	0.0475	0.0495	28.3908	0.0335	-0.1484	0.2838	-0.5053	0	0	0	9.9e-06	1.2761	1.0467	1.3964	0.9281	-0.0861501	0.127788	0	0	-0.1786	0.109091
Psmb9	27.8424	978.199	15.5029	0	33.3287	2648.7	34.597	0	0.0158	27.0478	0.0278	0.0131	32.8992	0.0124	-0.2713	0.2825	-1.1642	0	0	0	0.000209	0.4255	1.9714	0.4322	1.7964	-0.0155021	0.0974171	0	0	-0.177858	0.206107
Oat	25.7791	487.878	5.162	4e-16	30.0479	3238.08	30.5395	4.23e-15	0.0106	24.4672	0.0501	0.0094	29.7507	0.0092	-0.1719	0.2821	-2.443	0	0	0	5.52e-05	0.2581	2.5925	0.2803	2.2605	-0.0792009	0.14687	0	0	-0.177592	0.12766
Cotl1	27.0706	582.532	24.7226	0	32.1553	1417.02	73.3065	0	0.0424	25.8347	0.0444	0.052	31.4126	0.0221	0.293	0.282	-1.0066	0	0	0	0	1.0864	1.074	1.6151	0.6728	-0.327348	0.596314	0	0	-0.177569	-0.184615
Uqcrc1	26.3239	1079.49	38.1584	0	32.6898	703.789	21.0122	0	0.0354	25.6864	0.0238	0.03	31.2165	0.0443	-0.2358	0.2813	0.8948	0	0	0	1.35e-08	0.9092	1.2127	0.9293	1.0674	-0.0216292	0.136125	0	0	-0.177153	0.18
Atp5b	30.2956	1240.74	61.989	0	36.4311	2512.4	107.203	0	0.0499	29.5491	0.0239	0.0428	35.8918	0.0143	-0.2217	0.2805	-0.7424	0	0	0	0.000262	1.4687	0.8202	1.5298	0.726	-0.0399399	0.129752	0	0	-0.176717	0.165888
Pak1ip1	25.9276	873.073	9.3996	3.05e-20	31.1012	1830.6	18.7119	8.16e-19	0.0108	25.169	0.0289	0.0103	30.5603	0.0167	-0.0671	0.28	-0.7935	0	0	0	5.64e-05	0.2703	2.5301	0.311	2.1654	-0.130868	0.168422	0	0	-0.176415	0.0485437
Apbb1ip	25.1739	959.328	14.6622	0	30.3178	1632.47	27.1098	0	0.0153	24.5092	0.0255	0.0166	29.7498	0.0183	0.1151	0.2796	-0.4816	0	0	0	8.14e-11	0.3719	2.1542	0.4933	1.6784	-0.246098	0.283484	0	0	-0.176156	-0.0783133
Fis1	26.2658	268.208	14.4448	0	30.2128	731.794	32.7927	0	0.0539	23.9169	0.0893	0.0448	29.0105	0.0397	-0.2647	0.2785	-1.1704	0	0	0	1.26e-08	1.2874	0.9317	1.3019	0.8267	-0.0111376	0.127011	0	0	-0.175578	0.203125
Ccnh	28.3378	482.37	3.577	3.12e-15	33.055	1765.44	9.7351	1.29e-06	0.0074	26.7568	0.0557	0.0055	32.4333	0.0184	-0.4228	0.2776	-1.6019	0	0	0	3.21e-07	0.1985	2.9624	0.1791	2.8789	0.108319	0.0290041	0	0	-0.175021	0.345455
Ly6e	22.3653	356.471	17.5229	0	26.0222	1291.77	45.2121	0	0.0493	21.0409	0.0594	0.035	25.5001	0.0198	-0.4951	0.2773	-1.586	0	0	0	7.21e-09	1.0362	1.3212	0.8935	1.321	0.159709	0.0001514	0	0	-0.17487	0.408571
Higd1a	24.516	142.987	2.5842	8.7e-25	26.2174	725.521	12.5393	0	0.0181	20.8847	0.1462	0.0173	25.2767	0.035	-0.0678	0.2754	-2.063	3.17e-10	0	0	1.26e-05	0.3742	2.1041	0.4341	1.7841	-0.137987	0.179362	0	0	-0.173757	0.0462428
Mdh2	29.1498	296.248	16.9684	0	32.6195	2136.14	101.829	0	0.0573	26.5241	0.0896	0.0478	32.0988	0.015	-0.2628	0.2752	-2.5769	0	0	0	5.14e-10	1.5182	0.8035	1.5181	0.7185	6.58718e-05	0.118302	0	0	-0.173673	0.198745
Rogdi	27.7249	1119.96	23.3156	0	33.2817	2001.36	41.0558	0	0.0209	27.037	0.0241	0.0205	32.7194	0.0164	-0.0222	0.2752	-0.5627	5.35e-07	0	0	1.28e-09	0.561	1.7329	0.6725	1.4245	-0.165799	0.216497	0	0	-0.173671	0.0195122
Lsm5	24.0636	212.298	7.1294	0	27.0773	736.669	19.8307	0	0.0335	21.5751	0.1025	0.0269	26.1003	0.0355	-0.3163	0.2747	-1.5316	0	0	0	4.68e-06	0.7217	1.4336	0.7004	1.3262	0.0304112	0.0809833	0	0	-0.173377	0.245353
Nabp2	26.6875	794.306	9.1296	0	32.3505	902.454	8.7808	1.18e-17	0.0115	25.8018	0.0325	0.0097	31.2009	0.0347	-0.2422	0.2741	0.0925	0	0	9.36e-21	6.83e-05	0.2953	2.4603	0.3019	2.2045	-0.0218615	0.116035	0	0	-0.173043	0.185567
Malat1	46.885	1725.99	123.232	0	55.8191	4922.33	321.32	0	0.0722	45.6091	0.0264	0.0657	55.1521	0.0112	-0.1365	0.2741	-1.2388	5.97e-27	0	0	0	3.2574	0.3144	3.6019	0.2411	-0.095644	0.304023	0	0	-0.173031	0.0989346
Chic2	28.7815	146.654	2.9538	0	30.122	846.739	17.3494	0	0.0203	24.0418	0.1646	0.0205	29.0705	0.0344	0.0142	0.274	-2.2589	8e-11	0	0	8.88e-10	0.4857	1.8137	0.5958	1.4762	-0.184794	0.228628	0	0	-0.172983	-0.0097561
Bccip	23.8984	1056.36	18.8597	0	28.8188	1483.24	20.7831	1.1e-21	0.0179	23.368	0.0221	0.014	28.2551	0.0191	-0.3482	0.274	-0.2168	0	0	0	5.52e-05	0.4168	2.0089	0.3954	1.8823	0.0541224	0.0672581	0	0	-0.172963	0.278571
Ncor1	28.2708	506.702	6.807	0	32.6932	3214.78	42.2924	5.66e-27	0.0134	26.7615	0.0528	0.0131	32.3488	0.0101	-0.0334	0.2736	-2.387	8.13e-18	0	0	9.83e-06	0.3593	2.1861	0.4253	1.8364	-0.155185	0.190427	0	0	-0.17272	0.0229008
Ier5	25.4816	357.813	9.3254	0	29.1258	2203.74	44.176	0	0.0261	23.7726	0.0665	0.02	28.7286	0.0132	-0.3851	0.2732	-2.3347	0	0	0	2.89e-05	0.6183	1.6465	0.5729	1.6354	0.0792459	0.00678733	0	0	-0.172511	0.305
Hmgb3	25.7885	712.383	12.9318	0	30.7689	1266.85	15.7967	8e-25	0.0181	24.8585	0.035	0.0125	30.0207	0.0237	-0.5395	0.2722	-0.5622	0	0	0	4.82e-08	0.447	1.9046	0.374	1.9453	0.195187	-0.0209222	0	0	-0.171955	0.448
Rpl10-ps3	27.2345	980.11	52.7539	0	32.572	1741.47	87.7432	0	0.0538	26.4776	0.027	0.0503	31.9571	0.0184	-0.0984	0.2714	-0.5539	0	0	0	2.81e-11	1.4189	0.8543	1.6065	0.6922	-0.116776	0.234181	0	0	-0.171464	0.0695825
Map2k1	26.7941	201.336	1.8309	4.77e-14	29.2913	1067.01	11.9156	4.05e-22	0.0091	23.6092	0.118	0.0112	28.4935	0.0267	0.2981	0.2713	-2.1412	0	0	0	2.33e-08	0.2145	2.8706	0.3166	2.1483	-0.322489	0.336219	0	0	-0.171418	-0.1875
Oaz2	25.8749	582.487	3.9715	3.19e-12	31.9658	463.294	3.3155	2.82e-09	0.0068	24.7582	0.0426	0.0072	29.8764	0.0644	0.0753	0.2711	0.598	1.14e-15	0	0	1.5e-05	0.1684	3.2841	0.2134	2.6364	-0.210872	0.245676	0	0	-0.171312	-0.0555556
Selk	31.0414	1834.43	92.6602	0	37.3116	2925.86	110.699	0	0.0505	30.5075	0.0167	0.0381	36.8089	0.0125	-0.4062	0.2709	-0.4098	0	0	0	3.42e-20	1.5344	0.7934	1.3872	0.7736	0.106113	0.0255946	0	0	-0.171192	0.325459
Rab3d	25.1995	1689.75	13.3222	3.36e-14	30.7249	1205.65	11.4224	6.14e-21	0.0079	24.8164	0.0147	0.0095	29.9331	0.0248	0.2681	0.2704	0.7552	0	0	0	6.39e-07	0.1963	3.0358	0.2825	2.3084	-0.305133	0.31511	0	0	-0.170938	-0.168421
Dbi	25.7375	560.578	23.7527	0	30.6955	888.192	31.7369	0	0.0423	24.5852	0.044	0.0357	29.6412	0.0335	-0.2472	0.2698	-0.3932	0	0	0	5.42e-06	1.0369	1.1153	1.0516	1.0069	-0.0139787	0.107657	0	0	-0.170573	0.184874
Hsd17b10	26.4173	129.301	3.1742	0	27.4536	674.837	15.3295	0	0.0245	21.8627	0.1698	0.0227	26.3568	0.0393	-0.112	0.2697	-2.1114	0	0	0	1.05e-06	0.5324	1.7453	0.5946	1.4873	-0.104608	0.173469	0	0	-0.17051	0.0792952
Hist1h2ap	26.398	289.871	6.6378	0	29.5517	2205.64	45.8562	0	0.0229	24.1755	0.0835	0.0207	29.1363	0.0133	-0.1431	0.2693	-2.6517	0	0	0	0.00118	0.5513	1.8417	0.6016	1.7333	-0.0836104	0.0625397	0	0	-0.170262	0.10628
Brms1	25.6654	927.881	8.6688	5.82e-16	30.5036	2230.7	18.2709	3.54e-16	0.0093	24.9666	0.027	0.0082	30.0782	0.0135	-0.1896	0.2687	-0.9966	0	0	0	2.64e-05	0.2329	2.7752	0.2458	2.4965	-0.0524817	0.111636	0	0	-0.169944	0.134146
Atp5a1	26.8837	329.79	13.3705	0	30.632	1308.99	46.686	0	0.0405	24.8402	0.0754	0.0357	29.9188	0.0229	-0.1835	0.2684	-1.7207	0	0	0	1.08e-06	1.0042	1.1209	1.0693	0.972	-0.060881	0.153189	0	0	-0.169746	0.134454
Nipbl	27.9652	2350.35	13.1949	1.4e-10	33.8235	2113.91	14.3993	2.18e-13	0.0056	27.6211	0.0117	0.0068	33.2634	0.0158	0.2698	0.2682	0.4294	0	0	0	3.55e-06	0.1547	3.5313	0.2243	2.6536	-0.310299	0.330758	0	0	-0.169625	-0.176471
Gbe1	25.2243	1468.77	13.8235	2.96e-18	30.2883	2094.03	14.0799	4.32e-10	0.0094	24.7846	0.0169	0.0067	29.8385	0.0142	-0.4827	0.2677	-0.2503	0	0	0	9.52e-08	0.2335	2.7607	0.2011	2.7714	0.161114	-0.00386086	0	0	-0.169375	0.402985
Rnf7	27.9673	255.345	8.8424	0	31.0532	1305.63	38.4071	0	0.0346	25.189	0.0987	0.0296	30.3202	0.0232	-0.2291	0.2675	-2.0876	0	0	0	1.11e-06	0.8709	1.2524	0.8934	1.1139	-0.0251847	0.124338	0	0	-0.169234	0.168919
Gm10094	29.066	957.888	13.8412	0	35.0041	1102.53	10.4587	7.13e-22	0.0145	28.1996	0.0295	0.0095	33.9147	0.0308	-0.6071	0.2662	0.0618	0	0	6.17e-21	3.83e-10	0.4076	1.9446	0.3212	2.0428	0.268991	-0.0480713	0	0	-0.168514	0.526316
Rsrp1	24.5382	606.336	18.4622	0	28.8162	1841.7	67.8237	0	0.0305	23.5771	0.0389	0.0369	28.3532	0.0154	0.2735	0.2661	-1.3366	0	0	0	0	0.718	1.431	1.0432	1.0183	-0.311733	0.405283	0	0	-0.16845	-0.173442
Calr	25.4526	180.606	7.0414	0	27.2075	1837.96	70.502	0	0.039	22.2752	0.1233	0.0382	26.7844	0.0147	-0.0315	0.266	-3.0704	0.000334	0	0	4.44e-11	0.8619	1.289	1.0169	1.0672	-0.152424	0.207834	0	0	-0.168352	0.0209424
Tmem43	26.4487	1253.05	10.0958	4.13e-11	32.245	916.524	6.3033	1.78e-11	0.0081	25.8915	0.0207	0.0069	31.1314	0.0339	-0.2271	0.2659	0.7161	0	0	0	8.64e-06	0.2085	2.9079	0.2137	2.6623	-0.0243332	0.0922511	0	0	-0.168316	0.173913
Ppp1cb	28.8627	781.494	24.5175	0	33.8115	3268.22	110.516	0	0.0314	27.8181	0.0358	0.0337	33.4447	0.0103	0.1039	0.2658	-1.7955	0	0	0	2.1e-27	0.8728	1.2452	1.1281	0.9358	-0.22631	0.330626	0	0	-0.168236	-0.0682493
Ctdsp1	26.3794	432.202	3.8691	4.68e-14	30.2533	2395.35	19.9923	1.61e-12	0.0089	24.838	0.0576	0.0083	29.8497	0.0125	-0.0994	0.2652	-2.2075	2.9e-22	0	0	3.55e-05	0.2207	2.8668	0.2471	2.4649	-0.106839	0.163049	0	0	-0.167898	0.0722892
Mrpl35	29.1368	455.836	4.5319	1.75e-18	33.257	2920.7	23.2727	2.65e-15	0.01	27.372	0.0601	0.008	32.8652	0.0112	-0.3187	0.2639	-2.417	0	0	0	1.58e-05	0.2718	2.5555	0.2621	2.3742	0.0370088	0.0763626	0	0	-0.167143	0.25
Scamp2	27.0503	255.756	2.7348	2.3e-18	29.8615	1744.76	18.1687	3.28e-20	0.0107	24.4458	0.0959	0.0104	29.3491	0.0168	-0.039	0.2637	-2.5091	1.35e-19	0	0	3.41e-05	0.2617	2.6311	0.3054	2.2143	-0.143091	0.188231	0	0	-0.167068	0.0288462
Oaz1	50.5544	326.807	25.248	0	53.1817	4455.8	268.628	0	0.0779	43.7541	0.134	0.0607	52.5136	0.0118	-0.3594	0.2633	-3.5097	0	0	0	0	3.3828	0.2228	3.1648	0.2313	0.0688827	-0.0367488	0	0	-0.166804	0.283361
Upf3a	27.345	1028.58	6.0048	1.38e-07	32.2626	3666.16	23.4955	1.49e-08	0.0058	26.6281	0.026	0.0064	31.9588	0.0087	0.1346	0.2633	-1.5749	0	0	0	1.23e-05	0.1552	3.3916	0.2042	2.6858	-0.239961	0.262789	0	0	-0.166799	-0.09375
Cdk2	25.7049	698.604	10.1127	0	30.0413	2822.73	32.5188	2.32e-22	0.0145	24.7667	0.0355	0.0115	29.7119	0.0106	-0.33	0.2626	-1.7506	0	0	0	5.52e-05	0.3551	2.1513	0.3435	2.0257	0.03377	0.0620033	0	0	-0.166438	0.26087
Mxi1	27.1658	672.903	5.187	7.63e-14	32.4524	881.461	6.397	1.13e-12	0.0077	26.0921	0.0387	0.0073	31.2846	0.0356	-0.0945	0.2618	-0.1206	0	0	0	2.53e-05	0.2001	2.9848	0.2269	2.5957	-0.118114	0.149902	0	0	-0.165976	0.0547945
Eno1	33.4982	661.631	39.7685	0	38.998	1895.17	100.528	0	0.0601	31.8667	0.0483	0.0532	38.1913	0.0201	-0.1765	0.2612	-1.261	0	0	0	0.000818	1.9134	0.6092	2.0298	0.5117	-0.0573456	0.190541	0	0	-0.165603	0.129699
Coro7	26.1076	254.839	1.7752	9.34e-10	29.2765	901.206	6.7062	4.48e-10	0.007	23.6538	0.0933	0.0074	28.3422	0.0315	0.0976	0.2609	-1.5677	0	0	0	1.42e-05	0.164	3.3415	0.2103	2.6978	-0.220162	0.238602	0	0	-0.165421	-0.0540541
Tnfrsf13b	26.4686	906.227	12.741	0	31.3031	1916.71	31.4154	0	0.0141	25.6949	0.0284	0.0164	30.7849	0.0161	0.2217	0.2607	-0.8206	0	0	0	8.11e-13	0.3577	2.217	0.5036	1.6804	-0.289714	0.319329	0	0	-0.165341	-0.140244
Rpl23a-ps3	31.5351	671.46	40.569	0	36.5279	2764.83	141.678	0	0.0609	30.0918	0.0447	0.0515	36.0252	0.013	-0.242	0.2596	-1.7809	0	0	0	0.000191	1.8104	0.6566	1.8458	0.5827	-0.0191787	0.126823	0	0	-0.164701	0.182524
S100a13	26.6586	455.269	10.1825	0	30.5459	2203.36	54.8032	0	0.0225	25.1542	0.0551	0.0249	30.1017	0.0137	0.1461	0.259	-2.0092	0	0	0	2.09e-19	0.5569	1.679	0.7434	1.2835	-0.250874	0.308142	0	0	-0.164359	-0.0963855
Rcn2	28.0203	1078.45	7.8809	8.23e-14	33.0898	2695.42	14.4207	2.48e-10	0.0073	27.2943	0.0253	0.0054	32.6602	0.0121	-0.4513	0.2589	-1.061	0	0	0	1.72e-07	0.1986	2.9922	0.174	2.9316	0.141379	0.0206713	0	0	-0.164295	0.351852
Anapc11	28.6641	358.163	3.689	9.01e-22	33.3121	677.098	5.4694	1.49e-17	0.0103	26.5128	0.0742	0.0081	31.7157	0.0467	-0.3425	0.2585	-0.6665	0	0	0	4.01e-06	0.2706	2.5437	0.2541	2.4499	0.0649351	0.0382873	0	0	-0.164048	0.271605
Hhex	27.9449	249.856	4.9793	0	30.6705	1471.52	27.4775	0	0.0199	25.1004	0.1007	0.0186	30.0231	0.0205	-0.0961	0.2584	-2.2952	0	0	0	9.2e-06	0.4975	1.8334	0.558	1.5789	-0.108423	0.161188	0	0	-0.163964	0.0698925
Ppib	24.9319	770.956	29.9648	0	29.7995	919.506	32.9667	0	0.0389	24.133	0.0313	0.0358	28.8459	0.0314	-0.1175	0.2574	0.0044	0	0	2.87e-10	3.58e-08	0.9366	1.1983	1.0295	1.0242	-0.090238	0.169986	0	0	-0.163382	0.0865922
Rpl17	39.2514	1449.39	94.9356	0	46.2938	3421.38	218.278	0	0.066	38.1821	0.0263	0.0639	45.6339	0.0133	-0.0473	0.2572	-0.9773	3.07e-05	0	0	0	2.4853	0.4807	2.892	0.3536	-0.140629	0.359446	0	0	-0.163295	0.0328638
Tifa	25.6627	368.48	5.4907	0	29.0974	1908.84	22.758	0	0.0149	23.9769	0.0652	0.0119	28.6476	0.015	-0.3194	0.2568	-2.1182	0	0	0	3.08e-05	0.3568	2.3115	0.3414	2.1677	0.0451084	0.0663376	0	0	-0.16304	0.252101
Klhdc2	25.4404	455.75	6.851	1.62e-24	29.4351	1311.95	16.0956	1.95e-21	0.0151	24.0841	0.0529	0.0122	28.7694	0.022	-0.301	0.2565	-1.2626	0	0	0	6.25e-05	0.3621	2.1705	0.3515	2.0386	0.0301565	0.0647013	0	0	-0.162857	0.237705
Emc3	26.202	177.651	1.9213	6.65e-18	28.9294	480.89	5.1154	4.76e-19	0.0108	22.8327	0.1285	0.0106	27.2733	0.0568	-0.0247	0.2564	-1.1786	2.04e-13	0	0	4.44e-05	0.2468	2.6646	0.29	2.27	-0.148966	0.173833	0	0	-0.162819	0.0188679
Ndfip2	29.3115	488.804	5.9405	0	33.3792	3000.07	31.9655	1.56e-24	0.0122	27.6303	0.0564	0.0106	32.9932	0.011	-0.1979	0.2559	-2.3573	0	0	0	0.000121	0.3347	2.2491	0.3513	2.0176	-0.0472531	0.11474	0	0	-0.162546	0.150943
Cst3	29.193	1139.76	73.1546	0	34.7454	1575.23	92.9474	0	0.0643	28.4535	0.025	0.0593	33.9727	0.0215	-0.1166	0.2558	-0.2141	0	0	0	6.06e-09	1.8278	0.7148	1.9997	0.5774	-0.0859629	0.237963	0	0	-0.16246	0.084317
Slc25a4	25.8998	1170.2	18.6382	0	31.3167	891.787	10.31	0	0.0159	25.3323	0.0217	0.0116	30.2423	0.034	-0.4638	0.2556	0.6472	0	0	0	2.8e-07	0.4039	2.1359	0.3497	2.175	0.15499	-0.017977	0	0	-0.162355	0.37069
Eif3m	25.6495	611.559	20.9338	0	30.1862	1110.28	34.1222	0	0.0342	24.5933	0.0405	0.0307	29.3593	0.0265	-0.1537	0.2556	-0.6124	0	0	0	2.06e-07	0.8368	1.2858	0.8968	1.1165	-0.0669045	0.151635	0	0	-0.162334	0.114007
Rnaset2b	27.3696	218.675	7.9572	0	29.8631	1026.29	27.8621	0	0.0365	24.3066	0.1111	0.0272	29.0039	0.0283	-0.4265	0.2549	-1.9743	0	0	0	7.8e-11	0.8829	1.205	0.7862	1.1957	0.122997	0.00777787	0	0	-0.161954	0.341912
Rbbp6	26.2495	352.619	5.2336	0	29.907	1143.36	10.5182	2.96e-18	0.0148	24.4212	0.0695	0.0092	29.1274	0.0254	-0.684	0.2542	-1.4506	0	0	0	1.36e-11	0.363	2.2293	0.2663	2.4324	0.363124	-0.0834978	0	0	-0.161573	0.608696
Vamp8	30.926	288.269	18.4784	0	33.9746	1666.82	92.6577	0	0.0647	27.9113	0.0969	0.056	33.2677	0.0199	-0.2095	0.2533	-2.2838	0	0	0	8.14e-09	1.7924	0.6835	1.8414	0.5725	-0.0266102	0.193886	0	0	-0.161009	0.155357
Adss	25.9076	504.743	7.4746	0	29.9175	1539.73	24.5562	0	0.0148	24.6216	0.0488	0.016	29.3383	0.0191	0.108	0.2529	-1.3565	0	0	0	1.65e-08	0.3624	2.1274	0.469	1.7112	-0.227292	0.243221	0	0	-0.160769	-0.075
H2-DMb1	25.6333	715.092	11.1391	0	29.9959	1736.4	25.0124	0	0.0156	24.7342	0.0347	0.0144	29.4699	0.017	-0.1127	0.2527	-1.0303	0	0	0	8.64e-06	0.3846	2.2107	0.4241	1.8581	-0.0931384	0.189764	0	0	-0.160696	0.0833333
Cox6c	27.4172	1079.73	52.1234	0	32.8544	1044.42	45.1889	0	0.0484	26.7192	0.0247	0.0435	31.8307	0.0304	-0.1556	0.2525	0.2992	0	0	0	7.84e-09	1.2852	0.9163	1.3727	0.7712	-0.063743	0.188148	0	0	-0.160584	0.112644
Arl6ip4	24.9612	988.842	19.9527	0	30.2782	686.591	11.1665	0	0.0202	24.3343	0.0246	0.0163	28.9837	0.0422	-0.3068	0.2523	0.7757	0	0	0	0.000121	0.4903	1.8448	0.4706	1.7219	0.0418615	0.0713746	0	0	-0.160414	0.239264
Rpl7	33.8886	635.673	41.6885	0	38.8542	2579.75	158.128	0	0.0658	32.1401	0.0505	0.0614	38.2567	0.0148	-0.1002	0.2513	-1.7686	3.9e-22	0	0	8.71e-16	2.0943	0.5976	2.3441	0.4507	-0.106565	0.325937	0	0	-0.159883	0.0716612
Psme2b	28.7876	1085.59	14.2936	0	33.6486	4288.09	37.2867	4.02e-14	0.0132	28.0276	0.0258	0.0087	33.3585	0.0078	-0.6036	0.2512	-1.7244	0	0	0	2.62e-09	0.3681	2.0959	0.2901	2.1689	0.268873	-0.0336576	0	0	-0.159806	0.517241
Pfdn6	24.7583	227.955	4.0271	0	27.5628	744.79	12.2229	0	0.0177	22.3205	0.098	0.0164	26.5647	0.0357	-0.1062	0.2511	-1.4561	0	0	0	6.15e-05	0.3938	2.0704	0.4352	1.7961	-0.0951287	0.15272	0	0	-0.159768	0.0792683
Tcf3	28.4276	348.296	3.2779	5.79e-19	31.5505	3329.83	22.0256	6.82e-08	0.0095	26.2513	0.0753	0.0066	31.2393	0.0094	-0.5147	0.251	-3.0026	0	0	0	1.14e-07	0.245	2.6091	0.2074	2.6063	0.181292	0.00107432	0	0	-0.159671	0.439394
Ufd1l	27.4907	510.146	5.7989	1.79e-20	31.7978	1314.76	13.8872	2.9e-19	0.0114	26.0758	0.0511	0.0106	31.0303	0.0236	-0.1083	0.251	-1.1133	0	0	0	3.41e-05	0.2963	2.4571	0.3281	2.0891	-0.0969217	0.176152	0	0	-0.159667	0.0754717
Impa1	26.5952	1131.65	11.763	5.73e-24	31.2213	3100.34	33.7194	1.25e-20	0.0104	25.9653	0.023	0.0109	30.893	0.01	0.0624	0.2507	-1.1991	8.22e-13	0	0	5.08e-06	0.269	2.4988	0.3358	2.0334	-0.198928	0.228878	0	0	-0.159509	-0.0458716
Rsu1	26.1788	518.521	14.9534	0	30.0683	2073.36	52.3069	0	0.029	24.9072	0.048	0.0252	29.6197	0.0143	-0.201	0.25	-1.7443	0	0	0	7.94e-06	0.7156	1.4426	0.7452	1.2827	-0.0397209	0.124659	0	0	-0.1591	0.150794
Rtcb	26.9975	331.635	2.8439	4.1e-11	29.9839	2927.44	25.7922	3.76e-15	0.0086	24.9422	0.0752	0.0088	29.661	0.0101	0.0373	0.25	-2.8901	2.54e-06	0	0	1.45e-05	0.2134	2.8763	0.2612	2.3346	-0.183002	0.232031	0	0	-0.159091	-0.0227273
Ndufa2	27.9529	608.73	19.1866	0	32.025	3807.11	111.164	0	0.0315	26.7164	0.0439	0.0292	31.7459	0.0084	-0.111	0.2488	-2.3946	0	0	0	4.36e-10	0.8415	1.268	0.9317	1.0606	-0.0968123	0.19555	0	0	-0.15843	0.0787671
Jun	30.9486	750.288	53.9266	0	35.9319	2055.41	131.148	0	0.0721	29.6902	0.0395	0.0641	35.2747	0.0171	-0.1696	0.2486	-1.2063	0	0	0	0.00082	2.1132	0.6291	2.2284	0.5478	-0.0516963	0.148412	0	0	-0.158315	0.124805
Ccnb2	25.0105	366.216	7.6304	0	28.8605	759.109	11.4196	0	0.0208	23.3959	0.0639	0.015	27.7853	0.0367	-0.4713	0.2481	-0.8014	0	0	0	1.77e-08	0.4865	1.9541	0.4165	2.0674	0.168067	-0.0548031	0	0	-0.157976	0.386667
Gtf2e2	29.0538	341.232	3.1733	1.88e-21	32.1946	2347.59	18.7354	9.67e-17	0.0093	26.7512	0.0783	0.008	31.7377	0.0136	-0.2291	0.2466	-2.5287	0	0	0	3.08e-05	0.248	2.6344	0.2523	2.3894	-0.0170432	0.102536	0	0	-0.157116	0.1625
Klhl6	25.9577	418.615	5.9271	0	29.4635	1784.89	25.4699	0	0.0142	24.4294	0.0585	0.0143	28.9673	0.0162	0.0118	0.2458	-1.8475	1.82e-11	0	0	1.03e-05	0.3458	2.277	0.4136	1.9062	-0.163926	0.194523	0	0	-0.156656	-0.00699301
Smu1	26.8204	379.762	5.8838	0	30.4513	1225.23	15.8209	9.18e-22	0.0155	25.0409	0.066	0.0129	29.6895	0.0243	-0.2639	0.2457	-1.4416	0	0	0	0.000124	0.388	2.0618	0.3814	1.908	0.0173047	0.080608	0	0	-0.156574	0.20155
Eif1	47.8517	1479.14	90.7963	0	55.4158	6377.4	303.851	0	0.0622	46.3081	0.0312	0.0479	54.892	0.0086	-0.3782	0.2453	-1.8628	0	0	0	0	2.8348	0.3398	2.6023	0.3464	0.089344	-0.0190531	0	0	-0.156378	0.298539
Pgrmc1	27.6141	1044.84	8.2673	2.22e-12	32.7214	1181.95	7.8698	5.62e-09	0.0079	26.8785	0.0259	0.0067	31.8302	0.027	-0.2414	0.2439	0.057	0	0	0	7.99e-06	0.2112	2.8623	0.2125	2.6387	-0.00611765	0.0847387	0	0	-0.155566	0.179104
Gtf2f2	27.2327	267.693	2.9078	9.81e-24	30.0157	1179.33	11.4622	5.6e-15	0.0109	24.7062	0.0924	0.0097	29.2467	0.0248	-0.1605	0.2434	-1.8967	0	0	0	5.52e-05	0.2681	2.5453	0.2826	2.2419	-0.0513093	0.135332	0	0	-0.155248	0.123711
Rnaset2a	27.4906	271.524	10.5736	0	31.5861	444.564	13.2555	0	0.0388	24.9086	0.0923	0.0299	29.4711	0.0662	-0.3781	0.2427	-0.4792	0	0	0	3.46e-10	0.9618	1.1289	0.8773	1.0993	0.0963182	0.0269262	0	0	-0.154813	0.297659
Slc25a11	26.6375	239.552	2.5017	1.43e-18	28.9954	1254.56	15.8983	9.83e-27	0.0104	23.949	0.1003	0.0127	28.3268	0.0226	0.283	0.2422	-2.1527	0	0	0	5.68e-09	0.2498	2.6474	0.3591	2.0039	-0.304372	0.321124	0	0	-0.154546	-0.181102
Sumo2	36.2217	4147.91	199.397	0	42.8014	5413.11	199.309	0	0.048	35.8816	0.0087	0.0367	42.4275	0.0079	-0.3891	0.2418	-0.1353	0	0	1.12e-23	1.15e-26	1.7214	0.7325	1.5501	0.7338	0.110509	-0.0017716	0	0	-0.154284	0.307902
Atxn7l3b	26.9522	492.778	5.2921	1e-23	30.6954	1867.79	21.6818	7.57e-26	0.0108	25.5335	0.0518	0.0116	30.1792	0.0162	0.1068	0.2412	-1.6778	0	0	0	2.78e-06	0.2736	2.5656	0.3499	2.0797	-0.218062	0.233639	0	0	-0.153937	-0.0689655
Pigyl	26.6179	634.659	6.28	1.98e-18	30.9712	1181.28	10.976	6.01e-18	0.0099	25.5169	0.0404	0.0093	30.1585	0.0255	-0.0878	0.2411	-0.6608	2.23e-22	0	0	5.9e-05	0.251	2.664	0.2789	2.3348	-0.100036	0.140997	0	0	-0.153907	0.0645161
Rpl32	50.2963	3740.91	254.996	0	59.0778	8143.25	513.784	0	0.0683	49.5967	0.0133	0.0631	58.6075	0.0072	-0.1137	0.2408	-0.8793	0	0	0	0	3.3747	0.2988	3.6784	0.2537	-0.0825631	0.177769	0	0	-0.153748	0.0824089
Imp3	27.2191	179.748	1.7272	2.4e-19	28.4571	1478.97	14.6845	1.26e-15	0.0096	23.6219	0.1313	0.0099	27.907	0.0189	0.0437	0.2405	-2.798	1.74e-13	0	0	1.24e-05	0.2254	2.8473	0.277	2.3079	-0.186282	0.233719	0	0	-0.153549	-0.030303
Erh	27.809	285.085	17.5134	0	30.3839	2072.29	94.3279	0	0.0617	25.3272	0.0888	0.0454	29.9163	0.0145	-0.443	0.2402	-2.6134	0	0	0	7.74e-23	1.5568	0.8243	1.3493	0.8563	0.153783	-0.0373701	0	0	-0.153398	0.359031
Anapc5	24.6962	210.675	4.6569	0	27.1207	680.535	13.6534	0	0.0221	22.0821	0.1049	0.0201	26.0676	0.0383	-0.1395	0.2394	-1.4526	0	0	0	2.81e-05	0.4874	1.7949	0.5226	1.5703	-0.0673555	0.14303	0	0	-0.152891	0.0995025
Hsbp1	27.6473	1412.56	22.7454	0	32.5303	1928.87	26.1316	0	0.016	27.0983	0.0193	0.0136	31.9771	0.0166	-0.2425	0.2388	-0.2202	0	0	0	0.000157	0.4338	1.9451	0.4324	1.7853	0.00323774	0.0895088	0	0	-0.152572	0.176471
Napsa	27.514	1200.43	65.4366	0	32.6413	1145.93	64.4752	0	0.0545	26.8828	0.0224	0.0563	31.7204	0.0277	0.0476	0.2387	0.3032	8.96e-24	0	0	0	1.4601	0.8655	1.784	0.6357	-0.181558	0.361491	0	0	-0.152508	-0.0319716
Idh3g	25.7707	288.068	5.0648	0	28.3935	1526.68	24.1456	0	0.0175	23.6258	0.0823	0.0158	27.8666	0.0183	-0.1488	0.2382	-2.1724	0	0	0	8.69e-05	0.412	2.0166	0.4413	1.7731	-0.0663947	0.13733	0	0	-0.152182	0.107595
Rgs10	26.9309	565.923	8.1114	0	30.7387	2241.83	22.1476	3e-22	0.0143	25.6884	0.0454	0.0099	30.2953	0.0135	-0.5345	0.238	-1.7486	0	0	0	1.94e-08	0.3667	2.2302	0.2979	2.3072	0.23095	-0.0333738	0	0	-0.152066	0.444444
Rpl13	54.1507	5784.54	396.351	0	63.9133	6225.88	380.348	0	0.0685	53.6057	0.0093	0.0613	63.2121	0.0101	-0.1611	0.2378	0.1278	0	0	0	0	3.6573	0.2327	3.8449	0.2183	-0.0487919	0.0659643	0	0	-0.151971	0.117455
Ube2l3	26.0519	417.957	15.5792	0	29.3728	1757.16	57.8759	0	0.0373	24.4978	0.0587	0.0329	28.8707	0.0165	-0.1799	0.237	-1.8289	0	0	0	1.02e-06	0.9089	1.1957	0.9496	1.0535	-0.0428602	0.134979	0	0	-0.151465	0.133739
Tecr	31.9043	1236.01	66.3168	0	37.3216	2069.29	92.0275	0	0.0536	31.086	0.0252	0.0449	36.6349	0.0176	-0.2568	0.237	-0.5142	0	0	0	9.18e-09	1.6669	0.7399	1.6249	0.6944	0.0258477	0.0655242	0	0	-0.151465	0.193764
Ube2d2a	28.059	1184.49	50.7977	0	32.6431	3051.05	105.049	0	0.043	27.3899	0.0231	0.0344	32.279	0.0106	-0.321	0.237	-1.1247	0	0	0	3.85e-10	1.1704	0.9894	1.1087	0.9331	0.0556508	0.0603365	0	0	-0.151464	0.25
Grpel1	26.7181	977.641	16.7012	0	31.1138	2104.11	32.9929	0	0.0171	25.998	0.0268	0.0157	30.6385	0.0146	-0.1228	0.2369	-0.8751	0	0	0	8.9e-05	0.4435	1.8978	0.4785	1.6648	-0.0731452	0.139957	0	0	-0.15146	0.089172
Stk16	27.0837	822.665	12.4635	0	31.2298	2723.43	37.8567	0	0.0152	26.2006	0.0319	0.0139	30.8675	0.0114	-0.1262	0.2365	-1.4864	0	0	0	7.18e-05	0.3957	2.0507	0.43	1.7812	-0.0797674	0.151302	0	0	-0.151191	0.0935252
Sike1	27.6575	422.862	2.8394	1.52e-10	31.0954	1793.55	12.5027	6.9e-10	0.0067	25.9303	0.0612	0.007	30.5444	0.017	0.0546	0.2363	-1.8486	1.18e-07	0	0	1.76e-05	0.1724	3.2591	0.212	2.7037	-0.186792	0.205422	0	0	-0.151062	-0.0428571
Tmem50a	28.9867	732.112	34.5027	0	33.4046	1927.59	85.3989	0	0.047	27.858	0.0384	0.0443	32.8119	0.017	-0.0846	0.2361	-1.1742	0	0	0	3.23e-10	1.3095	0.9102	1.4529	0.7474	-0.0986992	0.217822	0	0	-0.150979	0.0609481
Vim	23.0777	528.573	17.1093	0	28.7692	274.61	13.7234	0	0.0324	22.0976	0.0418	0.05	26.0211	0.0948	0.6277	0.2358	1.1798	0	0	0	0	0.7127	1.5302	1.2979	0.8799	-0.450882	0.739061	0	0	-0.150781	-0.352
Cox6a1	26.9189	1305.99	58.6465	0	31.7549	1412.68	56.9572	0	0.0448	26.3615	0.0203	0.0404	31.0407	0.022	-0.15	0.2357	0.111	0	0	0	4.89e-08	1.1828	1.0023	1.2488	0.8617	-0.0528507	0.163166	0	0	-0.150744	0.108911
Tkt	29.6238	606.838	28.2478	0	33.6022	3327.37	160.324	0	0.0467	28.2363	0.0465	0.048	33.248	0.0101	0.0405	0.2357	-2.2107	6.92e-12	0	0	1.36e-25	1.313	0.9047	1.5985	0.6772	-0.178605	0.335942	0	0	-0.150737	-0.0270833
Nars	26.0756	317.028	3.4488	6.16e-23	29.5986	699.989	9.8496	3.91e-27	0.0109	24.0767	0.0761	0.014	28.3439	0.0409	0.3617	0.2354	-0.8937	0	0	0	2.38e-11	0.2608	2.5383	0.3919	1.8762	-0.334524	0.352894	0	0	-0.150551	-0.221429
Chchd2	30.1072	806.667	44.7234	0	35.2363	1106.4	56.0835	0	0.056	29.0025	0.036	0.0508	34.1348	0.0309	-0.1401	0.2351	-0.2202	0	0	0	3.08e-10	1.6106	0.7714	1.734	0.619	-0.0711649	0.246204	0	0	-0.150354	0.102362
Mif	24.1089	327.248	9.4171	0	27.3041	794.583	24.8998	0	0.0287	22.4056	0.0689	0.0313	26.3674	0.0333	0.1268	0.2349	-1.0506	0	0	0	4.19e-14	0.6359	1.6077	0.8192	1.2855	-0.223755	0.250642	0	0	-0.150254	-0.0830671
Rbm8a	25.8981	393.924	15.838	0	29.0196	1897.66	57.57	0	0.0402	24.2843	0.0619	0.0304	28.5688	0.015	-0.4024	0.2344	-2.0415	0	0	0	9.3e-12	0.9752	1.154	0.8655	1.1409	0.126748	0.0114822	0	0	-0.149971	0.322368
Bscl2	26.0312	356.899	4.9194	7.78e-26	29.4015	964.785	12.0884	1.51e-23	0.0138	24.2434	0.0681	0.0125	28.5153	0.0295	-0.1338	0.2341	-1.2055	0	0	0	0.000111	0.333	2.2987	0.3566	2.0332	-0.0661806	0.130582	0	0	-0.149811	0.104
Ugdh	27.7021	420.187	3.4365	5.61e-16	31.2331	1419.25	9.3929	1.9e-10	0.0082	25.9722	0.0618	0.0066	30.5396	0.0215	-0.3069	0.2337	-1.5229	0	0	0	2.36e-06	0.2111	2.9	0.2014	2.7323	0.0481629	0.0613769	0	0	-0.149557	0.242424
Dut	25.0357	365.704	12.286	0	28.0114	1651.72	39.3264	0	0.0336	23.4179	0.0642	0.0238	27.5284	0.0167	-0.4981	0.2333	-1.9397	0	0	0	5.41e-11	0.7844	1.3979	0.6529	1.4968	0.201409	-0.0660743	0	0	-0.149319	0.411765
Eef1d	27.0867	444.576	11.0647	0	30.5635	1530.98	38.3069	0	0.0249	25.4954	0.0575	0.025	29.9497	0.0196	0.0062	0.2323	-1.5484	1.83e-10	0	0	4.04e-11	0.6289	1.5533	0.7485	1.2669	-0.159786	0.226064	0	0	-0.148726	-0.004
Clpp	25.0105	296.283	2.6719	3.42e-16	27.4884	1712.97	12.8782	2.12e-08	0.009	23.034	0.0782	0.0075	27.0428	0.0158	-0.2584	0.2315	-2.3079	0	0	0	6.15e-06	0.2062	2.8913	0.2035	2.6661	0.0132678	0.0844679	0	0	-0.148239	0.2
Plgrkt	28.0461	328.937	3.2473	7.71e-16	30.5732	3886.66	38.9877	3.4e-21	0.0099	25.8306	0.0785	0.01	30.3219	0.0078	0.0184	0.2313	-3.3237	3.71e-05	0	0	1.82e-05	0.2546	2.6694	0.3047	2.2104	-0.164424	0.207655	0	0	-0.148121	-0.01
Mef2c	25.9094	640.433	28.3194	0	29.5654	2439.07	83.8101	0	0.0441	24.8815	0.039	0.0343	29.2003	0.012	-0.3629	0.2309	-1.7022	0	0	0	8.08e-09	1.0978	1.1011	1.005	1.0724	0.0923383	0.0267624	0	0	-0.147903	0.285714
Rpl22	24.7577	151.656	6.6001	0	25.4319	1257.73	57.6748	0	0.0434	21.2307	0.1414	0.0457	24.9085	0.0199	0.0752	0.2305	-2.8249	0	0	0	1e-18	0.92	1.2303	1.1384	0.9682	-0.191848	0.270709	0	0	-0.147652	-0.0503282
Vps72	26.7345	191.265	1.9164	2.87e-14	28.9601	565.353	5.4356	1.55e-15	0.01	23.4468	0.1226	0.0096	27.4972	0.0488	-0.0627	0.2299	-1.3289	6.95e-20	0	0	4.43e-05	0.2346	2.7637	0.2595	2.3751	-0.0959538	0.163614	0	0	-0.147302	0.0416667
Gapt	26.843	394.534	4.0058	7.1e-17	30.8014	689.056	7.6633	3.55e-22	0.0102	25.1246	0.0637	0.0112	29.4647	0.0427	0.1375	0.2299	-0.5764	0	0	0	2.51e-06	0.2547	2.69	0.3273	2.1448	-0.221815	0.254196	0	0	-0.147298	-0.0892857
Slc25a3	27.6483	858.959	24.7486	0	32.4209	1004.89	25.902	0	0.0288	26.7724	0.0312	0.0258	31.3939	0.0312	-0.159	0.2297	0.0014	0	0	6.73e-11	1.4e-07	0.7695	1.3698	0.8086	1.1969	-0.0483552	0.144457	0	0	-0.14721	0.116279
Selenbp1	27.4079	444.346	2.7522	6.55e-08	30.7407	1975.77	16.8565	1.17e-14	0.0062	25.798	0.0583	0.0086	30.2429	0.0153	0.467	0.2293	-1.9313	0	0	0	1.4e-07	0.1597	3.2731	0.2571	2.3916	-0.378841	0.368582	0	0	-0.146973	-0.27907
Exosc4	27.0881	1508.53	13.233	1.01e-14	31.678	1991.97	15.0464	9.71e-11	0.0088	26.5972	0.0177	0.0076	31.1651	0.0156	-0.209	0.2287	-0.18	0	0	0	1.4e-05	0.2326	2.7779	0.2353	2.5371	-0.0114747	0.0949115	0	0	-0.146571	0.157895
Smarca5	28.6328	722.013	6.79	2.98e-20	32.7199	2202.67	33.1519	0	0.0094	27.5275	0.0381	0.0151	32.2182	0.0146	0.6809	0.227	-1.3829	0	0	0	3.16e-26	0.258	2.5183	0.4827	1.6675	-0.465507	0.510225	0	0	-0.145592	-0.377483
Zfand6	27.3219	1320.49	26.5303	0	31.7175	2357.76	42.3891	0	0.0201	26.7502	0.0203	0.018	31.2875	0.0133	-0.1591	0.226	-0.6105	0	0	0	3.33e-05	0.5341	1.7449	0.5636	1.5369	-0.0523421	0.135337	0	0	-0.14502	0.116667
Hat1	27.8589	583.949	4.4497	4.77e-11	31.4621	2706.9	20.558	6.4e-11	0.0076	26.5719	0.0457	0.0076	31.0774	0.0115	-0.0001	0.226	-1.9929	9.45e-10	0	0	3.65e-05	0.2025	2.9051	0.2351	2.4831	-0.138664	0.169949	0	0	-0.144977	0
Mlx	29.5403	146.093	0.8634	2e-06	29.4648	1035.72	8.0804	1.27e-13	0.0059	24.4882	0.1685	0.0078	28.6353	0.0278	0.4028	0.2257	-2.6019	0	0	0	1.25e-06	0.1431	3.5426	0.2229	2.6018	-0.358008	0.361596	0	0	-0.144825	-0.24359
Mrpl42	26.49	308.221	6.602	0	29.5733	784.082	12.4262	0	0.0215	24.3702	0.079	0.0159	28.4874	0.0363	-0.4367	0.2252	-1.1211	0	0	0	7.33e-07	0.5188	1.7658	0.4512	1.7475	0.149823	0.0104721	0	0	-0.144527	0.352201
Thyn1	27.3441	328.712	2.0932	3.91e-07	30.2671	1171.2	8.2344	4.28e-10	0.0064	25.2226	0.0767	0.007	29.4835	0.0252	0.144	0.2252	-1.6069	0	0	0	1.15e-05	0.1595	3.3766	0.2066	2.664	-0.227977	0.267492	0	0	-0.144518	-0.0857143
Tpm3	33.1231	691.812	33.6906	0	37.6198	2075.31	97.438	0	0.0488	31.5883	0.0456	0.0472	36.9157	0.0178	-0.0496	0.2248	-1.3621	1.28e-17	0	0	3.96e-10	1.534	0.7612	1.7242	0.6124	-0.110312	0.242978	0	0	-0.144313	0.0338983
Rpl27	43.2026	4133.1	179.567	0	50.4918	4761.17	219.031	0	0.0434	42.7259	0.0103	0.0461	49.9248	0.0105	0.0865	0.2246	0.0173	1.81e-16	0	5.33e-06	0	1.8536	0.6313	2.29	0.4343	-0.190568	0.453603	0	0	-0.144195	-0.0585683
Dynlrb1	26.8412	633.831	23.5325	0	30.4588	2400.64	69.2024	0	0.037	25.7302	0.0408	0.0287	30.0591	0.0126	-0.3653	0.2243	-1.6929	0	0	0	5.3e-09	0.9481	1.1966	0.8653	1.1485	0.0956894	0.0418807	0	0	-0.144013	0.289199
BC018473	25.6794	203.771	4.7552	0	27.8937	575.875	18.0933	0	0.0234	22.7597	0.1117	0.0314	26.5848	0.0463	0.4269	0.2241	-1.2709	0	0	0	0	0.5256	1.8697	0.8332	1.3108	-0.369179	0.426381	0	0	-0.143883	-0.254777
Rae1	26.4541	240.994	2.9729	4.58e-21	28.3426	1553.61	14.6848	5.97e-14	0.0123	23.8236	0.0989	0.0095	27.8223	0.0179	-0.3824	0.2238	-2.4673	0	0	0	3.51e-06	0.2929	2.4092	0.2626	2.3108	0.115385	0.0425827	0	0	-0.143723	0.294737
Lst1	25.7735	231.579	3.769	0	28.4563	553.902	14.3172	0	0.0163	23.1762	0.1	0.0259	27.056	0.0489	0.6622	0.2233	-1.0322	0	0	0	0	0.3762	2.138	0.6992	1.3879	-0.461957	0.540457	0	0	-0.143399	-0.370656
Fcer1g	39.3739	1645.58	98.8294	0	45.6474	2695.2	167.984	0	0.0601	38.4235	0.0234	0.0627	44.849	0.0166	0.0606	0.2231	-0.4918	4.63e-09	0	0	0	2.2995	0.5157	2.7848	0.3229	-0.174267	0.597089	0	0	-0.14327	-0.0414673
Elf1	24.936	203.838	3.1685	0	27.1527	569.759	8.7616	9.57e-27	0.0156	22.1961	0.109	0.0154	25.9015	0.0455	-0.0153	0.2227	-1.2607	0.000242	0	0	1.65e-05	0.3439	2.2675	0.3978	1.915	-0.135495	0.184073	0	0	-0.143057	0.012987
Csnk2b	26.0064	822.411	15.9617	0	31.0076	578.013	10.2145	0	0.0194	25.1958	0.0307	0.0177	29.3997	0.0508	-0.1292	0.2226	0.7279	0	0	0	7.76e-05	0.4874	1.8157	0.5167	1.6118	-0.056706	0.126505	0	0	-0.142991	0.0960452
Hnrnpr	27.2344	680.588	8.5338	5.37e-25	30.9684	2259.48	25.2347	3.61e-23	0.0125	26.1686	0.0385	0.0112	30.5283	0.0135	-0.1637	0.2223	-1.511	0	0	0	8.1e-05	0.327	2.269	0.341	2.0042	-0.0410557	0.132123	0	0	-0.142808	0.116071
Stt3a	27.2739	939.496	17.2318	0	31.3556	2176.29	32.0531	0	0.0183	26.4857	0.0284	0.0148	30.8939	0.0142	-0.3102	0.2221	-0.999	0	0	0	4.86e-05	0.4847	1.7989	0.456	1.7129	0.0629386	0.0502073	0	0	-0.142688	0.236486
Rps16	40.4107	3677.13	236.702	0	47.2127	3770.58	222.982	0	0.0647	39.9485	0.0108	0.0592	46.5903	0.0124	-0.1287	0.2219	0.1901	0	0	0	5.88e-12	2.5716	0.4468	2.7423	0.3794	-0.062247	0.177649	0	0	-0.142558	0.0929054
Brk1	25.1537	535.859	22.1272	0	28.5162	1608.56	62.8384	0	0.0413	24.0112	0.0449	0.0391	28.0019	0.0174	-0.0796	0.2218	-1.3637	0	0	0	8.55e-11	0.9891	1.1568	1.0901	0.9604	-0.0926521	0.204498	0	0	-0.142515	0.056266
Dctn2	29.0267	426.846	3.561	6.08e-15	32.1053	2441.25	24.0627	5.71e-19	0.0083	27.1625	0.0638	0.0099	31.6743	0.013	0.2394	0.2217	-2.297	0	0	0	2.11e-07	0.2269	2.8251	0.313	2.1602	-0.27508	0.307796	0	0	-0.142444	-0.161616
Ndnl2	27.6309	826.152	8.3088	1.67e-21	31.5077	2818.81	22.2773	1.62e-16	0.01	26.7058	0.0325	0.0079	31.1416	0.0111	-0.346	0.2217	-1.5525	0	0	0	4.85e-06	0.2653	2.5778	0.2465	2.4478	0.0762677	0.0531089	0	0	-0.14244	0.265823
Gatm	26.0655	615.695	20.0081	0	30.0398	988.43	26.4118	0	0.0325	24.9888	0.0407	0.0269	29.1329	0.0294	-0.2703	0.2214	-0.4674	0	0	0	7.06e-05	0.8098	1.3465	0.7777	1.289	0.0412756	0.0446082	0	0	-0.142248	0.208178
Fus	26.7103	1233.91	28.3219	0	31.2892	1179.84	27.9037	0	0.023	26.1339	0.0212	0.0237	30.4674	0.0258	0.041	0.2213	0.2871	1.1e-11	0	0	1.15e-11	0.6006	1.5924	0.7208	1.2875	-0.166759	0.236816	0	0	-0.142234	-0.0295359
Bri3	26.9679	267.187	5.9925	0	29.2725	1155.04	19.4298	0	0.0224	24.4695	0.0917	0.0168	28.5255	0.0247	-0.4159	0.2213	-1.8901	0	0	0	1.22e-06	0.5468	1.7658	0.4775	1.7746	0.145131	-0.00495886	0	0	-0.142189	0.333333
Cuta	26.55	627.15	17.8388	0	30.1209	2025.67	48.535	0	0.0285	25.4505	0.0406	0.024	29.6593	0.0147	-0.2513	0.2208	-1.4684	0	0	0	1.55e-05	0.721	1.4243	0.7085	1.3118	0.0176429	0.08576	0	0	-0.141905	0.1875
Ufc1	25.9339	616.121	11.5578	0	29.3581	2241.44	37.6208	0	0.0187	24.8621	0.0406	0.0168	28.9656	0.0129	-0.1577	0.2204	-1.6486	0	0	0	0.00011	0.4629	1.9138	0.4855	1.6985	-0.0465499	0.126759	0	0	-0.141668	0.113095
Ube2e3	27.0139	502.413	8.5182	0	30.9409	860.047	8.3817	2.43e-15	0.017	25.6111	0.0508	0.0098	29.8379	0.0347	-0.806	0.2204	-0.5502	0	0	0	2.55e-16	0.431	1.9846	0.2894	2.2654	0.489288	-0.123952	0	0	-0.141659	0.734694
Rplp2	35.6759	1914.52	93.7748	0	41.4511	2526.92	127.013	0	0.0492	34.9913	0.0182	0.0505	40.7583	0.0161	0.038	0.2201	-0.179	2.44e-12	0	0	0	1.7011	0.7158	2.0514	0.5382	-0.170761	0.329989	0	0	-0.141493	-0.0257426
Rps10	31.1616	816.777	40.3692	0	36.5702	792.987	46.8069	0	0.0496	30.0015	0.0367	0.0593	34.9393	0.044	0.2579	0.2198	0.2623	0	0	0	0	1.4831	0.8445	2.0615	0.5485	-0.280572	0.539654	0	0	-0.141325	-0.163575
2001-09-01	28.7804	451.849	5.7319	3.79e-26	32.4014	1135.8	9.9614	8.88e-17	0.0127	27.0401	0.0599	0.0088	31.4851	0.0277	-0.53	0.2196	-1.1124	0	0	0	6.5e-09	0.3414	2.2568	0.2759	2.3322	0.237405	-0.03233	0	0	-0.141178	0.443182
Etfb	26.6185	453.32	27.1828	0	29.8057	1658.66	70.9082	0	0.0599	25.1277	0.0557	0.0427	29.2575	0.0177	-0.4892	0.2195	-1.6513	0	0	0	0	1.5043	0.8459	1.2466	0.9123	0.206722	-0.0727831	0	0	-0.141154	0.40281
Trnau1ap	25.4037	569.325	5.9138	1.35e-18	29.1628	954.862	8.5574	4.6e-15	0.0104	24.2978	0.043	0.009	28.2846	0.0296	-0.2076	0.2192	-0.5365	0	0	0	2.26e-05	0.2505	2.6972	0.2526	2.4592	-0.00831354	0.0967794	0	0	-0.140953	0.155556
Slc39a11	27.9851	835.488	7.6366	1.02e-16	31.9532	2231.41	16.5756	4.91e-11	0.0091	27.0549	0.0324	0.0075	31.4842	0.0141	-0.2924	0.2187	-1.2029	0	0	0	9.81e-06	0.2455	2.678	0.2342	2.4703	0.0482494	0.0840789	0	0	-0.140683	0.213333
Pkib	26.4964	396.046	3.4179	7.33e-19	29.931	848.114	7.8685	1.51e-17	0.0086	24.8245	0.0627	0.0093	28.8828	0.034	0.1072	0.2184	-0.8825	0	0	0	2.18e-05	0.2138	3.0911	0.2656	2.5472	-0.19503	0.213529	0	0	-0.140509	-0.0752688
Pgam1	32.4846	1280.61	61.7881	0	37.2561	3372.62	153.621	0	0.0485	31.6628	0.0247	0.0455	36.8322	0.0109	-0.0899	0.2182	-1.1781	4.79e-24	0	0	1.2e-07	1.5289	0.8054	1.6755	0.6679	-0.0874963	0.205869	0	0	-0.14035	0.0659341
Sumo1	27.7553	385.747	22.2514	0	30.8796	1178.24	52.2505	0	0.0578	25.8595	0.067	0.0444	30.0739	0.0255	-0.3821	0.2178	-1.392	0	0	0	2.14e-25	1.4785	0.8219	1.3306	0.7928	0.111153	0.0367053	0	0	-0.140135	0.301802
Yipf3	26.537	592.507	3.871	9.14e-12	30.8965	674.155	5.0205	6.8e-12	0.0065	25.3886	0.043	0.0074	29.5158	0.0439	0.1894	0.2173	0.028	0	0	7.83e-07	1.15e-05	0.1653	3.3677	0.219	2.6751	-0.245205	0.258906	0	0	-0.13983	-0.121622
Vapa	33.4143	2744.1	144.583	0	38.9973	2466.64	104.381	0	0.0526	32.9948	0.0121	0.0424	38.3536	0.0155	-0.3105	0.2171	0.3638	0	0	0	1.14e-22	1.7367	0.6775	1.6153	0.6518	0.0751563	0.0394293	0	0	-0.139721	0.240566
G6pdx	26.4996	1247.04	7.8673	2.61e-07	30.9753	1157.79	10.6586	2.85e-19	0.0063	25.9409	0.0209	0.0092	30.1522	0.0261	0.5445	0.217	0.32	0	0	0	2.39e-08	0.1639	3.3345	0.2772	2.3777	-0.40873	0.402406	0	0	-0.139668	-0.315217
Isyna1	27.3887	608.33	6.179	1.35e-19	32.4123	507.025	4.5603	4e-15	0.0102	26.1888	0.0431	0.009	30.4376	0.06	-0.1723	0.2169	0.4759	0	0	0	4.25e-05	0.265	2.5501	0.2726	2.3089	-0.0278797	0.104465	0	0	-0.139591	0.133333
Mien1	28.2628	604.079	8.8167	0	31.8783	1951.17	32.2863	0	0.0146	26.9797	0.0447	0.0165	31.3466	0.0161	0.1795	0.2164	-1.4739	0	0	0	1.93e-12	0.3925	2.1316	0.5173	1.6322	-0.241253	0.305967	0	0	-0.13931	-0.115152
Mrps26	28.8264	505.892	7.6183	0	32.3835	1471.65	17.1711	9.28e-25	0.015	27.2569	0.0541	0.0116	31.6665	0.0216	-0.3698	0.2163	-1.3251	0	0	0	7.21e-06	0.4098	2.0092	0.3679	1.9486	0.11389	0.0310993	0	0	-0.139251	0.293103
Mrfap1	25.6743	454.176	13.3918	0	28.6319	1904.72	57.2954	0	0.0295	24.2775	0.0535	0.03	28.1978	0.0149	0.0272	0.216	-1.8475	8.58e-21	0	0	1.54e-14	0.7124	1.431	0.8503	1.1424	-0.162178	0.252626	0	0	-0.139029	-0.0166667
Ech1	26.1908	440.012	10.911	0	29.2333	1526.66	37.1561	0	0.0247	24.6893	0.0567	0.0243	28.6753	0.0188	-0.0236	0.2159	-1.592	0.00383	0	0	1.51e-08	0.6085	1.6101	0.6984	1.3443	-0.128723	0.197724	0	0	-0.139005	0.0164609
Sema4a	28.3334	1124.95	9.8439	9e-18	32.6953	1733.64	18.4595	8.22e-22	0.0088	27.6131	0.0246	0.0106	32.0653	0.0185	0.2815	0.2157	-0.4061	0	0	0	5.45e-08	0.2402	2.7302	0.34	2.0832	-0.293529	0.31058	0	0	-0.138848	-0.169811
Dnajc9	26.4591	151.513	2.7953	0	26.6617	1353.18	17.9508	1.75e-21	0.0185	22.5117	0.1485	0.0132	26.1307	0.0194	-0.4833	0.2151	-2.9354	0	0	0	2.13e-08	0.4145	1.9873	0.3445	2.0597	0.203193	-0.0351508	0	0	-0.138496	0.401515
Ube2r2	24.8124	281.935	2.4919	1.48e-14	27.0834	1146.9	11.19	1.46e-20	0.0088	22.7977	0.0809	0.0098	26.4494	0.0231	0.1418	0.2143	-1.8087	0	0	0	1.88e-05	0.2015	3.1164	0.258	2.5442	-0.218992	0.224904	0	0	-0.138064	-0.102041
Rab44	28.2848	461.075	4.5121	2.57e-20	31.4148	1905.2	18.1738	2.36e-22	0.0098	26.6279	0.0577	0.0095	30.8905	0.0162	-0.0434	0.2142	-1.8275	2.53e-11	0	0	4.61e-05	0.2589	2.611	0.2945	2.2281	-0.120883	0.17185	0	0	-0.137991	0.0315789
Dbnl	26.7459	295.43	4.1111	1.03e-23	29.2928	994.682	16.8849	0	0.0139	24.5148	0.0831	0.017	28.4373	0.0286	0.2886	0.2141	-1.5395	0	0	0	3.55e-12	0.3404	2.251	0.4826	1.7143	-0.294654	0.313072	0	0	-0.137935	-0.182353
Gca	27.6959	602.598	3.716	1.06e-10	31.248	1780.65	15.8081	4.89e-16	0.0062	26.4617	0.0439	0.0089	30.6914	0.0172	0.526	0.2139	-1.3488	0	0	0	1.26e-08	0.1629	3.3413	0.2727	2.3467	-0.40264	0.423829	0	0	-0.137814	-0.303371
Uri1	28.5722	531.383	3.5255	3.1e-12	32.1487	1433.86	9.456	1.58e-08	0.0066	27.0947	0.0511	0.0066	31.4242	0.0219	0.0029	0.2139	-1.2244	3.12e-08	0	0	1.93e-05	0.1789	3.143	0.2067	2.6717	-0.134494	0.176405	0	0	-0.137776	0
mt-Cytb	27.6233	325.632	14.4649	0	29.9654	1738.28	59.3154	0	0.0445	25.4127	0.078	0.0341	29.4464	0.017	-0.3837	0.2125	-2.2007	0	0	0	1.52e-10	1.1141	1.0651	1.0043	1.0779	0.10933	-0.0118749	0	0	-0.136984	0.304985
Ptprcap	26.3354	577.326	4.7829	7.54e-18	30.0797	948.128	6.5118	1.74e-12	0.0083	25.1562	0.044	0.0069	29.1323	0.0309	-0.2675	0.2117	-0.5115	0	0	0	2.55e-06	0.2068	3.1029	0.1992	2.8815	0.0381526	0.076835	0	0	-0.136484	0.202899
Cmtm7	33.5405	981.018	69.4878	0	38.183	2280.05	135.964	0	0.071	32.415	0.033	0.0596	37.5326	0.0165	-0.2517	0.2115	-1.0016	0	0	0	0.000175	2.2934	0.5738	2.2384	0.5671	0.0245711	0.0118145	0	0	-0.136351	0.191275
Smpdl3a	24.559	251.256	7.3467	0	27.3838	479.555	16.2228	0	0.0293	22.3504	0.0892	0.0338	25.8756	0.0541	0.2091	0.2113	-0.7211	0	0	0	3.39e-21	0.6513	1.6019	0.8691	1.2338	-0.250604	0.298347	0	0	-0.136236	-0.133136
Frg1	25.3413	429.463	15.7549	0	30.3606	316.706	8.7563	0	0.0367	23.9072	0.0559	0.0277	27.6747	0.0873	-0.4021	0.2111	0.6426	0	0	0	3.44e-11	0.8743	1.2695	0.7619	1.2627	0.147526	0.00538529	0	0	-0.136135	0.32491
Ctbp1	25.1645	609.021	17.0684	0	29.6777	483.102	12.0181	0	0.028	24.1411	0.0398	0.0249	27.9424	0.0579	-0.168	0.211	0.5384	0	0	0	3.54e-05	0.6708	1.4634	0.6943	1.313	-0.033847	0.114547	0	0	-0.136041	0.124498
Sap18	27.7913	790.36	33.0071	0	31.4799	2223.43	68.1477	0	0.0421	26.8131	0.0338	0.0307	31.0265	0.014	-0.457	0.2106	-1.2761	0	0	0	1.03e-18	1.1069	1.0129	0.9537	1.0369	0.160638	-0.0231459	0	0	-0.1358	0.371336
Alg5	27.8724	319.678	3.9279	0	30.1453	1782.26	20.9695	1.45e-23	0.0123	25.6237	0.0801	0.0118	29.6399	0.0167	-0.0659	0.2101	-2.265	3.22e-26	0	0	6.06e-05	0.3135	2.3721	0.3497	2.0258	-0.103517	0.170945	0	0	-0.1355	0.0423729
Rpl7a-ps5	27.1551	210.347	3.0534	2.71e-27	28.3298	1481.26	22.1339	0	0.0145	24.0174	0.115	0.015	27.7811	0.0187	0.048	0.21	-2.6181	0	0	0	2.78e-06	0.3479	2.1173	0.4145	1.7652	-0.160676	0.199467	0	0	-0.135477	-0.0333333
Lims1	30.0006	1035.52	10.5807	0	34.1574	2661.41	39.4004	0	0.0102	29.1379	0.0282	0.0149	33.6943	0.0126	0.5396	0.2096	-1.1556	0	0	0	2.84e-20	0.2973	2.4776	0.4959	1.7064	-0.400484	0.451946	0	0	-0.135228	-0.315436
Pygl	27.4096	1305.48	19.4844	0	31.508	2150.93	48.4449	0	0.0149	26.8446	0.0206	0.0225	31.0312	0.0145	0.5915	0.2091	-0.5082	0	0	0	0	0.4022	2.028	0.6958	1.3465	-0.42196	0.506127	0	0	-0.134916	-0.337778
Srm	25.5491	326.667	3.0124	2.46e-16	27.9348	1384.57	13.4416	7.22e-14	0.0092	23.6821	0.0726	0.0097	27.3614	0.0198	0.0753	0.2083	-1.8749	5.06e-27	0	0	3.54e-05	0.2171	2.8698	0.2649	2.4104	-0.180445	0.190591	0	0	-0.13447	-0.0515464
Fam46a	29.3891	833.599	5.1927	1.22e-11	33.4579	1609.95	12.345	4.44e-18	0.0062	28.3564	0.0342	0.0077	32.7602	0.0204	0.3029	0.2083	-0.7465	0	0	0	3.07e-06	0.1752	3.3927	0.2508	2.5694	-0.301435	0.320425	0	0	-0.134425	-0.194805
Aimp1	27.8218	1131.64	10.2733	2.61e-19	32.0537	1462.08	12.9506	2.03e-14	0.0091	27.1408	0.024	0.0089	31.3491	0.0215	-0.0346	0.208	-0.1626	1.96e-12	0	0	3.14e-05	0.2461	2.7022	0.277	2.28	-0.111552	0.185175	0	0	-0.13424	0.0224719
Mrps11	26.6792	1044.2	8.3922	7.95e-13	30.2907	3661.22	26.12	6.58e-12	0.008	26.0024	0.025	0.0071	30.0315	0.0082	-0.1719	0.2078	-1.6043	0	0	0	1.55e-05	0.209	2.9415	0.2148	2.6117	-0.0270019	0.126278	0	0	-0.134162	0.126761
Glul	24.1589	686.643	17.2708	0	27.481	1346.16	31.0546	0	0.0251	23.316	0.034	0.023	26.9192	0.0201	-0.1264	0.2073	-0.7583	0	0	0	7.24e-07	0.583	1.6994	0.6208	1.4674	-0.0608892	0.158103	0	0	-0.133852	0.0913043
AA467197	25.3105	1506.27	10.663	6.7e-13	29.1105	2213.34	23.3268	0	0.0071	24.8835	0.0166	0.0105	28.7169	0.013	0.5721	0.2067	-0.3504	0	0	0	1.1e-06	0.1758	3.4079	0.3016	2.553	-0.417109	0.334861	0	0	-0.133489	-0.32381
Dhrs1	25.8853	1324.73	9.8082	2.86e-13	30.5756	711.424	5.5305	1.83e-15	0.0074	25.3767	0.0193	0.0078	29.284	0.0411	0.0784	0.2066	1.0926	1.4e-19	0	0	2.07e-05	0.1873	3.1954	0.2257	2.6622	-0.170137	0.200285	0	0	-0.133428	-0.0512821
Gnas	28.3897	311.217	13.2027	0	30.4455	1970.19	70.9804	0	0.0425	25.9693	0.0835	0.0361	29.9661	0.0152	-0.2348	0.2065	-2.4577	0	0	0	0.000116	1.0929	1.0659	1.0783	1.0023	0.0135398	0.0634541	0	0	-0.133377	0.177285
Ndufv2	27.1341	429.906	14.0045	0	30.0309	1430.32	35.5487	0	0.0325	25.4917	0.0595	0.0249	29.3912	0.0206	-0.3877	0.2054	-1.5328	0	0	0	2.19e-09	0.8241	1.3042	0.7272	1.2939	0.133251	0.00796043	0	0	-0.132676	0.305221
Cox4i1	40.4973	2933.97	169.577	0	46.4813	4784.71	252.46	0	0.0583	39.9173	0.0136	0.0527	46.0015	0.0096	-0.1451	0.2047	-0.4961	0	0	0	1.03e-05	2.3058	0.4969	2.4243	0.3898	-0.0488801	0.274756	0	0	-0.132261	0.106262
Cyb5a	27.5899	327.928	5.3187	0	30.1266	1089.83	16.2684	0	0.0162	25.4246	0.0776	0.0149	29.2949	0.027	-0.1222	0.2044	-1.5246	0	0	0	8.04e-05	0.4107	2.0776	0.435	1.8326	-0.0558621	0.13369	0	0	-0.132115	0.0872483
Zfos1	26.9231	1790.17	11.2314	3.09e-07	31.1741	1539.39	10.9027	3.22e-15	0.0063	26.5097	0.0148	0.0071	30.5443	0.0199	0.1733	0.2044	0.427	0	0	0	1.4e-05	0.1662	3.314	0.2162	2.6569	-0.231267	0.247318	0	0	-0.13209	-0.112676
Znhit1	24.9265	1354.87	25.4722	0	29.2304	792.547	18.4765	0	0.0187	24.456	0.0182	0.0234	28.1723	0.0355	0.3193	0.2041	0.9623	0	0	0	1.47e-21	0.4579	1.8839	0.6537	1.3919	-0.299526	0.353474	0	0	-0.131913	-0.200855
Rpl36-ps3	28.6068	305.596	2.3522	1.52e-12	31.1827	881.061	6.9019	1.58e-09	0.0077	26.1319	0.0857	0.0078	30.0928	0.0343	0.0239	0.2036	-1.3221	0.00271	0	0	2.85e-05	0.2005	2.903	0.2344	2.4366	-0.144625	0.191414	0	0	-0.131623	-0.0128205
Gng5	28.14	521.585	23.0724	0	31.4093	1416.6	59.2764	0	0.0442	26.6726	0.0513	0.0418	30.7121	0.0217	-0.079	0.2034	-1.2395	4.74e-23	0	0	1.85e-11	1.1734	1.0004	1.2842	0.8226	-0.0862794	0.216144	0	0	-0.131528	0.0574163
Uqcrh	24.6801	564.468	20.6919	0	28.3152	697.597	26.6896	0	0.0366	23.6234	0.0423	0.0383	27.1979	0.039	0.0669	0.2033	-0.1183	0	0	0	7.92e-17	0.8643	1.2605	1.0392	0.9984	-0.168303	0.26252	0	0	-0.131426	-0.0443864
Fkbp4	27.3606	1730.42	19.8611	3.68e-20	32.0166	961.939	8.342	1.82e-13	0.0115	26.9216	0.0156	0.0087	30.9658	0.0321	-0.3955	0.2019	1.0412	0	0	0	6.16e-07	0.3091	2.3132	0.2682	2.2947	0.152498	0.00806206	0	0	-0.130602	0.321839
mt-Co1	35.1248	1946.57	112.243	0	39.9678	5247.12	254.435	0	0.0578	34.4814	0.0177	0.0486	39.6453	0.0076	-0.2499	0.2013	-1.2286	0	0	0	1.04e-07	1.9862	0.6104	1.9307	0.5802	0.0287461	0.052051	0	0	-0.130253	0.1893
Cnih4	29.083	247.542	3.4302	0	30.1834	3447.27	33.4355	8.4e-19	0.0139	26.0125	0.105	0.0097	29.9047	0.0087	-0.5204	0.2012	-3.5934	0	0	0	1.5e-09	0.3599	2.1623	0.2895	2.2974	0.243178	-0.0588056	0	0	-0.130153	0.43299
Padi4	25.9548	444.42	5.4809	3.77e-21	28.8748	1209.05	18.0614	0	0.0123	24.5196	0.0553	0.015	28.187	0.0233	0.2781	0.2011	-1.2451	0	0	0	1.91e-08	0.3019	2.4007	0.4212	1.8873	-0.283238	0.272029	0	0	-0.13011	-0.18
Tmem258	27.2412	912.57	22.7164	0	30.9667	1676.44	37.1119	0	0.0249	26.4332	0.0291	0.0221	30.3865	0.0181	-0.17	0.2011	-0.6832	0	0	0	3.83e-05	0.6567	1.48	0.6724	1.3458	-0.0233492	0.0997176	0	0	-0.130101	0.126697
Tsg101	25.7242	414.691	4.8927	3.87e-24	29.852	410.081	4.2571	2.52e-16	0.0118	24.1997	0.0584	0.0104	27.8188	0.0679	-0.1853	0.2011	0.2159	0	0	0	4.79e-05	0.2842	2.4661	0.2887	2.2457	-0.0155871	0.0981431	0	0	-0.130095	0.134615
Msn	27.1577	1107.69	20.7502	0	31.067	1602.57	31.499	0	0.0187	26.4997	0.024	0.0197	30.455	0.019	0.0707	0.2007	-0.334	0	0	0	5.39e-08	0.4969	1.817	0.5973	1.5113	-0.16809	0.202276	0	0	-0.129874	-0.0507614
Msra	26.1286	265.821	5.8618	0	29.1759	431.959	8.5743	0	0.022	23.7708	0.0897	0.0199	27.3154	0.0632	-0.1445	0.2005	-0.5057	0	0	0	0.000115	0.5229	1.7743	0.5424	1.5918	-0.0359513	0.11465	0	0	-0.129766	0.105528
Ppp1cc	26.4223	407.44	16.4607	0	29.2083	1152.05	40.3155	0	0.0403	24.7812	0.0613	0.0351	28.4714	0.0247	-0.1974	0.2003	-1.3102	0	0	0	5.06e-07	0.9947	1.1229	0.9972	1.0178	-0.00250702	0.103262	0	0	-0.129611	0.148148
Ncf4	29.5125	2581.06	118.75	0	34.1523	1880.06	97.6147	0	0.046	29.1736	0.0114	0.0521	33.515	0.0178	0.1813	0.2001	0.6471	0	0	0	0	1.345	0.9259	1.7312	0.6497	-0.223082	0.425119	0	0	-0.129536	-0.117083
Sirpa	26.8183	545.237	4.2839	4.69e-14	30.0355	1306.71	13.9151	2.61e-21	0.0079	25.5497	0.0469	0.0107	29.3501	0.0225	0.4379	0.2001	-1.0605	0	0	0	2.03e-08	0.2004	2.9818	0.3129	2.207	-0.35954	0.351065	0	0	-0.129485	-0.261682
Ptpn18	26.6287	587.841	17.6122	0	29.5374	3164.52	103.357	0	0.03	25.4615	0.0433	0.0326	29.2484	0.0093	0.1171	0.2	-2.2159	0	0	0	4.58e-20	0.762	1.3889	0.9554	1.077	-0.202428	0.289601	0	0	-0.129474	-0.0797546
Abhd17a	29.481	616.883	4.9154	1.54e-14	32.6199	3373.36	28.9707	3.68e-18	0.008	28.1163	0.0455	0.0086	32.2924	0.0096	0.1036	0.1998	-2.2478	0	0	0	1.2e-05	0.2235	2.8447	0.2774	2.3058	-0.194304	0.233715	0	0	-0.129321	-0.0697674
Atp6v0d1	27.6726	354.871	9.2114	0	30.3867	991.221	25.4288	0	0.026	25.6662	0.0724	0.0257	29.4659	0.0297	-0.0165	0.1992	-1.2851	1.15e-09	0	0	1.88e-09	0.6669	1.4928	0.7558	1.2515	-0.117624	0.192809	0	0	-0.128952	0.0116732
Vps35	26.6213	244.329	3.4466	6.76e-27	28.7688	652.775	9.8581	2.54e-27	0.0142	23.9881	0.098	0.0152	27.5393	0.0423	0.1022	0.1992	-1.2133	3.59e-26	0	0	7.8e-07	0.3365	2.1965	0.4168	1.8028	-0.192658	0.218383	0	0	-0.12895	-0.0657895
Gm1604a	28.7814	374.617	3.682	6.39e-23	31.7504	906.286	6.793	1.31e-13	0.0098	26.7143	0.0713	0.0075	30.6553	0.0338	-0.3915	0.1985	-1.0756	0	0	0	6.34e-07	0.2613	2.6329	0.2285	2.5767	0.143545	0.0218108	0	0	-0.128559	0.306667
Rpl13-ps3	31.5189	874.091	46.936	0	35.3418	2754.54	119.995	0	0.0539	30.3955	0.0347	0.0435	34.8721	0.0127	-0.31	0.1982	-1.4521	0	0	0	3.02e-14	1.6245	0.7328	1.5173	0.7233	0.0706518	0.0131342	0	0	-0.128372	0.23908
Apopt1	27.6308	566.825	4.0015	4.62e-13	30.7616	1710.13	10.8925	1.78e-07	0.0071	26.3336	0.0465	0.0064	30.2046	0.0177	-0.1499	0.1979	-1.3925	0	0	0	8.02e-06	0.1849	3.1408	0.193	2.794	-0.0419689	0.124123	0	0	-0.128159	0.109375
Lamp2	28.0277	854.237	23.6122	0	31.6079	1976.69	55.7781	0	0.0277	27.1109	0.0318	0.0283	31.0904	0.0157	0.0333	0.1976	-1.0163	1.11e-07	0	0	5.3e-12	0.7438	1.3959	0.8745	1.15	-0.149457	0.213826	0	0	-0.127998	-0.0212014
Eif2s2	28.2917	606.126	16.7702	0	31.44	2255.55	44.7507	0	0.0277	27.0214	0.0446	0.0199	30.9871	0.0137	-0.4805	0.1976	-1.6984	0	0	0	7.93e-13	0.7484	1.3873	0.6121	1.4478	0.222676	-0.0417875	0	0	-0.127979	0.39196
Denr	26.382	721.983	12.8854	0	30.1157	952.59	12.8868	0	0.0178	25.4392	0.0353	0.0135	29.1725	0.0307	-0.4005	0.1976	-0.2007	0	0	0	6.68e-07	0.4539	1.8855	0.3922	1.8813	0.157318	0.0022325	0	0	-0.127973	0.318519
Cebpb	41.5442	3615.34	228.485	0	48.5097	1618.47	99.4618	0	0.0633	41.0375	0.0114	0.0619	47.0543	0.029	-0.032	0.1974	1.3503	2.92e-05	0	0	3.82e-18	2.5735	0.485	2.8734	0.3583	-0.104371	0.353614	0	0	-0.127869	0.0226171
Hoxa10	26.2978	1452.5	16.6471	5.68e-25	30.3069	1281.6	18.1717	0	0.0115	25.8134	0.0178	0.0142	29.5919	0.0231	0.3049	0.1971	0.379	0	0	0	8.23e-12	0.2947	2.448	0.4192	1.8283	-0.296994	0.338949	0	0	-0.127687	-0.190141
Rhoa	29.3185	1379.14	47.8827	0	33.6111	1569.55	64.9991	0	0.0348	28.6918	0.0208	0.0414	32.8849	0.021	0.2526	0.1968	0.0116	0	0	3.38e-11	0	0.9947	1.136	1.3578	0.8028	-0.267418	0.415047	0	0	-0.127508	-0.15942
Ccl3	22.1137	397.499	16.2207	0	25.0762	569.482	23.9764	0	0.0408	20.9328	0.0531	0.042	23.9908	0.0425	0.0414	0.1967	-0.323	3.11e-21	0	0	5.23e-09	0.8528	1.5426	1.0047	1.3202	-0.151189	0.168459	0	0	-0.127466	-0.0285714
Nkg7	23.943	763.971	21.5815	0	27.3106	1024.62	15.5645	0	0.0282	23.1946	0.0306	0.0151	26.5778	0.0261	-0.8944	0.1964	-0.2261	0	0	0	4.07e-27	0.6513	1.703	0.4011	2.1058	0.623785	-0.191281	0	0	-0.127294	0.86755
Cacybp	28.3577	1043.7	18.9913	0	32.124	1992.36	27.6719	0	0.0181	27.5829	0.0268	0.0139	31.5933	0.0159	-0.3812	0.1958	-0.7584	0	0	0	1.82e-06	0.4994	1.7961	0.4374	1.7589	0.141747	0.0211496	0	0	-0.126938	0.302158
Rbck1	29.7087	1723.14	15.0911	1.46e-19	33.802	2967.79	23.5395	6.47e-10	0.0087	29.1792	0.017	0.0079	33.4079	0.0113	-0.1405	0.1952	-0.5924	0	0	0	4.54e-05	0.2532	2.646	0.2658	2.3003	-0.0474041	0.150285	0	0	-0.126578	0.101266
Rpl4	37.3999	1031.57	69.8081	0	42.0233	2442.25	154.055	0	0.068	36.071	0.035	0.0636	41.2825	0.0169	-0.0962	0.1947	-1.051	0	0	0	2.78e-07	2.4454	0.4988	2.6082	0.4222	-0.0624185	0.181431	0	0	-0.12624	0.0691824
Otub1	27.8797	797.379	7.7679	2.15e-19	31.495	1395.01	16.6618	0	0.0098	26.9152	0.0337	0.012	30.7791	0.022	0.2969	0.1935	-0.6146	0	0	0	8.63e-09	0.2607	2.6021	0.3663	1.9925	-0.288288	0.305947	0	0	-0.125536	-0.183333
Cpsf6	28.1689	493.262	6.4503	6.23e-25	30.6961	4205.12	50.4637	2.98e-20	0.0131	26.6349	0.054	0.012	30.4569	0.0073	-0.1312	0.1935	-2.8949	0	0	0	0.000182	0.3482	2.1652	0.3663	1.9398	-0.049413	0.116198	0	0	-0.125489	0.0916667
Pilrb2	27.8929	900.789	7.1522	2.32e-13	32.9244	508.758	4.9494	5.9e-20	0.0079	27.035	0.0302	0.0098	30.8881	0.0605	0.3087	0.1922	1.003	0	0	0	3.28e-06	0.214	3.0111	0.2983	2.355	-0.282601	0.278599	0	0	-0.124744	-0.193878
Dap	24.4226	1192.24	24.9034	0	27.9813	1205.22	20.9072	0	0.0209	23.9265	0.0202	0.0173	27.3221	0.0227	-0.2711	0.1915	0.1717	0	0	0	4.36e-05	0.5005	1.7967	0.4702	1.6943	0.0644407	0.0604379	0	0	-0.12428	0.208092
Mrps18c	28.3813	1154.26	23.6895	0	32.8813	844.908	15.1959	0	0.0205	27.6847	0.024	0.018	31.6122	0.0374	-0.1866	0.1914	0.6367	0	0	0	0.000125	0.5673	1.6504	0.5629	1.5208	0.00781666	0.0852183	0	0	-0.12424	0.138889
Rbbp7	26.1573	817.691	17.071	0	29.4377	1665.04	27.0419	0	0.021	25.3308	0.0309	0.0163	28.9126	0.0174	-0.3709	0.1908	-0.8317	0	0	0	2.84e-06	0.5273	1.7194	0.4696	1.6909	0.122871	0.0168549	0	0	-0.123884	0.288344
Iqgap1	28.643	208.826	1.3319	9.04e-10	29.627	897.75	12.6732	0	0.0064	25.1284	0.1202	0.0141	28.6658	0.032	1.1406	0.19	-1.9095	0	0	0	0	0.1585	3.4796	0.4051	1.9408	-0.608739	0.792869	0	0	-0.123401	-0.546099
Hp	48.6457	2441.17	164.739	0	54.9029	5877.88	394.439	0	0.0678	47.6549	0.0195	0.0673	54.3528	0.0092	-0.0096	0.1897	-1.0764	0.00184	0	0	0	3.1949	0.3276	3.6307	0.1992	-0.120032	0.644578	0	0	-0.12323	0.00742942
Gdi2	28.4257	663.427	24.0934	0	31.628	1778.24	62.9493	0	0.0364	27.2382	0.0411	0.0355	31.0585	0.0175	-0.0361	0.1894	-1.2335	2.52e-07	0	0	5.93e-11	0.9857	1.1415	1.0991	0.9444	-0.103175	0.208704	0	0	-0.123003	0.0253521
Sephs2	26.4675	221.816	5.5618	0	27.8121	869.263	23.4083	0	0.0252	23.6215	0.1064	0.0269	26.9201	0.0312	0.0933	0.1886	-1.7711	0	0	0	4.13e-12	0.5894	1.6075	0.7203	1.2967	-0.18173	0.239685	0	0	-0.122533	-0.063197
Ctage5	26.1496	1350.62	15.1685	0	30.3469	798.398	10.7068	0	0.0112	25.6348	0.0191	0.0134	29.2133	0.0367	0.2592	0.1885	0.941	0	0	0	1.48e-08	0.2866	2.4949	0.3901	1.9258	-0.265317	0.295514	0	0	-0.122496	-0.164179
Tuba1b	24.1514	487.183	27.261	0	27.3297	635.225	27.6646	0	0.0559	22.9875	0.0473	0.0436	26.1917	0.0412	-0.3597	0.1883	-0.1974	0	0	0	8.64e-09	1.2753	1.0497	1.1403	1.0969	0.11839	-0.0430304	0	0	-0.122336	0.28211
Rpl35	42.1605	579.341	44.7509	0	45.7202	2167.01	147.751	0	0.078	39.2752	0.0679	0.0683	44.7487	0.0206	-0.1915	0.1882	-1.7168	0	0	0	0.43	3.0392	0.3311	3.0482	0.3165	-0.00295256	0.0461295	0	0	-0.122316	0.14202
Srsf5	29.9515	597.852	34.5245	0	33.27	1396.81	65.0836	0	0.0579	28.508	0.0477	0.0467	32.4784	0.0233	-0.3098	0.1881	-1.0347	0	0	0	3.02e-18	1.6461	0.7301	1.517	0.711	0.0851022	0.0268636	0	0	-0.122247	0.239829
Phyh	28.3024	223.35	2.1313	2.07e-18	29.8171	689.634	5.3916	9.76e-13	0.0095	25.0759	0.1124	0.0078	28.5652	0.0414	-0.2855	0.188	-1.4404	0	0	0	2.58e-06	0.2368	2.7796	0.2232	2.6413	0.0609319	0.0523606	0	0	-0.122152	0.217949
Cd9	22.3015	223.624	13.3479	0	24.1252	528.551	23.6886	0	0.0596	20.2488	0.0914	0.0448	23.0653	0.0437	-0.4108	0.1879	-1.0647	0	0	0	1.28e-12	1.2046	1.0746	1.0322	1.1387	0.167022	-0.0562923	0	0	-0.12211	0.330357
Eci1	28.7628	3109.57	21.0361	4.72e-15	33.4175	1138.55	7.0944	2.56e-09	0.0067	28.4907	0.0092	0.0062	32.4508	0.0285	-0.112	0.1878	1.6274	0	0	0	9.72e-06	0.1927	3.0581	0.2023	2.7281	-0.0474543	0.120963	0	0	-0.122034	0.0806452
Mapk1	26.7555	371.959	3.766	2.94e-17	29.7642	633.776	8.2425	8.2e-24	0.0102	24.9454	0.0672	0.013	28.401	0.0449	0.3538	0.1872	-0.5817	0	0	0	2.7e-09	0.253	2.5582	0.3674	1.9435	-0.311377	0.316285	0	0	-0.121672	-0.215385
Crlf2	25.6886	331.565	6.573	0	28.1835	718.2	12.2044	0	0.0198	23.812	0.0719	0.017	27.1009	0.0378	-0.2207	0.1867	-0.9286	0	0	0	0.000155	0.4694	1.8962	0.4587	1.786	0.0233268	0.0617021	0	0	-0.121358	0.164706
Pdcd6	25.5424	492.016	17.6423	0	28.2508	1245.04	41.5026	0	0.0359	24.264	0.0493	0.0333	27.6077	0.0223	-0.1093	0.1863	-1.1479	0	0	0	3.59e-08	0.8671	1.2559	0.9188	1.0796	-0.056269	0.163301	0	0	-0.121115	0.0780781
Morf4l2	28.0969	1059.36	18.1108	0	31.6523	1867.47	32.6422	0	0.017	27.3511	0.026	0.0175	31.1155	0.0167	0.0387	0.186	-0.6423	3.54e-13	0	0	4.43e-07	0.4663	1.8146	0.5454	1.5201	-0.145031	0.193737	0	0	-0.120982	-0.0285714
Tk1	26.0942	654.098	11.3817	0	29.0691	1586.98	16.9101	4.04e-25	0.0174	25.078	0.0387	0.0106	28.5281	0.0181	-0.7076	0.186	-1.0986	0	0	0	4.5e-15	0.4348	2.0117	0.3023	2.2841	0.438306	-0.119259	0	0	-0.120937	0.641509
Tax1bp1	26.0504	1083.1	36.5745	0	29.4962	1513.56	49.4443	0	0.0336	25.4162	0.0238	0.0326	28.9063	0.0192	-0.0445	0.1856	-0.3109	0	0	0	5.1e-07	0.8531	1.2859	0.9339	1.1072	-0.0865189	0.161398	0	0	-0.120738	0.0306748
Rpl39	26.7657	493.054	11.703	0	29.3262	1904.43	64.4625	0	0.0238	25.3764	0.0514	0.0338	28.8606	0.0152	0.507	0.1856	-1.7614	0	0	0	0	0.6027	1.5879	0.9725	1.0811	-0.380257	0.468782	0	0	-0.120725	-0.295858
Aspscr1	27.8156	558.034	4.334	1.19e-09	30.9292	1182.09	10.1411	7.74e-16	0.0078	26.4855	0.0475	0.0086	30.1189	0.0256	0.1398	0.1855	-0.8903	0	0	0	1.57e-05	0.2049	2.9836	0.2575	2.4176	-0.204272	0.234116	0	0	-0.120635	-0.0930233
Acp1	25.7426	830.392	13.0715	0	28.9389	1471.67	20.1977	1.81e-23	0.0158	24.9581	0.03	0.0137	28.3732	0.0193	-0.202	0.185	-0.6382	0	0	0	0.000163	0.3922	2.0536	0.3898	1.9004	0.006157	0.0806146	0	0	-0.120364	0.153285
Ramp1	27.2242	743.847	47.1543	0	30.2691	2206.3	104.47	0	0.0635	26.2479	0.0353	0.0474	29.8366	0.0135	-0.4229	0.1849	-1.3816	0	0	0	8.2e-26	1.6614	0.7945	1.4033	0.8685	0.183924	-0.0852044	0	0	-0.120278	0.339662
Cdc20	26.9792	1606.96	18.0078	0	30.9612	1150.99	8.7353	1.84e-14	0.0112	26.5155	0.0165	0.0076	30.139	0.0262	-0.5654	0.1848	0.6687	0	0	0	1.59e-10	0.2964	2.5341	0.2286	2.7271	0.296588	-0.0707711	0	0	-0.120226	0.473684
Gpi1	36.9929	1785.53	91.3528	0	42.002	2151.98	114.163	0	0.0512	36.2262	0.0203	0.0533	41.162	0.0191	0.0596	0.1843	-0.0898	2.56e-12	0	0	0	1.853	0.648	2.1739	0.4734	-0.147615	0.368821	0	0	-0.119912	-0.0393996
Mcm6	28.4293	514.739	6.239	0	31.2879	1374.35	14.8302	1.32e-18	0.0121	26.9181	0.0523	0.0108	30.575	0.0222	-0.1659	0.1838	-1.2347	0	0	0	7.7e-05	0.3243	2.2877	0.3298	2.0931	-0.0166768	0.0929721	0	0	-0.119604	0.12037
Nmt1	29.0644	1503.65	9.701	2.32e-10	32.7563	2846.15	23.9241	6.33e-13	0.0064	28.4943	0.0192	0.0084	32.3607	0.0114	0.385	0.1836	-0.7488	0	0	0	2.91e-07	0.1834	3.0929	0.272	2.3188	-0.325735	0.333836	0	0	-0.119478	-0.238095
Churc1	26.1131	642.063	10.4201	0	28.9668	1707.52	29.047	0	0.0162	25.0731	0.0391	0.017	28.4701	0.0167	0.0713	0.1833	-1.2302	1.01e-15	0	0	4.94e-07	0.4054	2.0213	0.4828	1.6841	-0.160315	0.200226	0	0	-0.119318	-0.0470588
Psmb2	29.2994	747.115	42.5644	0	32.7263	1480.32	69.6754	0	0.057	28.1816	0.0378	0.0472	31.9993	0.0216	-0.2701	0.1833	-0.8072	0	0	0	4.05e-17	1.6029	0.7627	1.5029	0.7271	0.066538	0.0489616	0	0	-0.119306	0.207627
Cdca8	27.1269	541.849	8.9683	0	29.8657	1607.67	19.4357	0	0.0165	25.8181	0.0477	0.0121	29.307	0.0182	-0.4518	0.1829	-1.388	0	0	0	1.24e-08	0.426	2.0333	0.3548	2.1326	0.200676	-0.0465629	0	0	-0.119047	0.363636
Stip1	26.853	462.086	3.9512	2.18e-14	29.2547	1877.93	13.6531	4.75e-13	0.0086	25.3676	0.0549	0.0073	28.7877	0.0153	-0.2315	0.1825	-1.8434	0	0	0	3.99e-06	0.2171	2.7773	0.209	2.6099	0.038756	0.0641404	0	0	-0.118804	0.178082
Impdh2	29.2894	304.862	4.27	0	31.5213	784.87	10.8588	0	0.014	26.6939	0.0876	0.0139	30.2893	0.0386	-0.0168	0.1823	-1.1816	0.00769	0	0	3.28e-05	0.3723	2.0898	0.4193	1.7857	-0.112092	0.170297	0	0	-0.118702	0.00719424
Prss57	24.5238	759.223	20.6564	0	28.4275	521.888	10.8919	0	0.0272	23.7422	0.0314	0.0209	26.9394	0.0517	-0.3816	0.1823	0.7212	0	0	0	1.34e-07	0.6451	1.5707	0.5603	1.589	0.151347	-0.0115167	0	0	-0.118681	0.301435
Aamp	26.0031	1063.65	12.6876	1.78e-19	29.2891	1689.19	19.8748	1.91e-21	0.0119	25.3682	0.0239	0.0118	28.7735	0.0171	-0.0203	0.1817	-0.4836	0.000244	0	0	5.7e-05	0.3016	2.3749	0.3377	2.0483	-0.1069	0.159449	0	0	-0.118348	0.00847458
Ssb	26.398	2266.92	53.2489	0	30.0723	1861.13	33.0844	0	0.0235	26.085	0.0116	0.0178	29.5772	0.0159	-0.4025	0.1813	0.4555	0	0	0	3.95e-09	0.6159	1.5438	0.5242	1.5828	0.174933	-0.0246399	0	0	-0.118071	0.320225
Ppt2	27.4358	3250.45	25.1698	7.72e-15	31.5251	1406.92	8.8762	1.36e-08	0.0077	27.1871	0.0085	0.0063	30.8264	0.0219	-0.2882	0.1812	1.3731	0	0	0	1.18e-06	0.2091	2.9494	0.1954	2.7954	0.0701126	0.0550905	0	0	-0.118058	0.222222
Dazap1	28.4852	618.225	24.6509	0	31.2939	2269.77	64.5963	0	0.0398	27.2148	0.0443	0.0284	30.8468	0.0136	-0.4849	0.1807	-1.7019	0	0	0	5.38e-27	1.0834	1.0558	0.8741	1.1142	0.239446	-0.0524143	0	0	-0.117743	0.401408
Ngdn	29.3599	527.093	7.4061	0	31.8958	2504.05	29.9808	0	0.014	27.7715	0.053	0.012	31.4745	0.0126	-0.2254	0.1806	-2.0755	0	0	0	0.000106	0.387	2.1051	0.376	1.9626	0.0292553	0.0726078	0	0	-0.117651	0.166667
Psma4	27.429	629.405	19.0498	0	30.354	1573.64	45.079	0	0.0303	26.2712	0.0418	0.0287	29.7607	0.0189	-0.0761	0.1799	-1.145	0	0	0	7.56e-07	0.7961	1.333	0.8526	1.1544	-0.0662679	0.154712	0	0	-0.117252	0.0557491
Mkrn1	26.094	1338.31	40.3754	0	29.7138	1155.78	24.8217	0	0.03	25.5636	0.0194	0.0215	28.9577	0.0251	-0.4802	0.1799	0.3703	0	0	0	3.24e-10	0.761	1.4819	0.6223	1.5196	0.222883	-0.0248092	0	0	-0.117209	0.395349
Ppp4c	27.7856	648.729	26.7663	0	31.3577	810.528	24.191	0	0.0413	26.6324	0.0411	0.0298	30.1607	0.0373	-0.4676	0.1795	-0.1405	0	0	0	2.84e-23	1.0995	1.0659	0.8946	1.1216	0.229041	-0.0496612	0	0	-0.116983	0.385906
Spcs1	25.7233	781.948	29.7086	0	30.2909	410.33	12.237	0	0.038	24.894	0.0319	0.0298	28.1906	0.0687	-0.3489	0.1794	1.1087	0	0	0	2.29e-11	0.9458	1.1869	0.8394	1.1712	0.126757	0.0134051	0	0	-0.11694	0.275168
Tspan32	27.5487	489.134	4.6115	4.79e-18	30.0615	1650.54	22.439	9.83e-26	0.0094	26.0673	0.0534	0.0136	29.5103	0.0179	0.5324	0.179	-1.5786	0	0	0	2.97e-15	0.245	2.708	0.4016	1.8826	-0.38994	0.438436	0	0	-0.116671	-0.308824
Psmd7	27.2378	992.279	16.9298	0	30.7302	1277.02	21.4158	0	0.0171	26.5015	0.0267	0.0168	29.9962	0.0235	-0.0206	0.1787	-0.1871	2.4e-15	0	0	1.05e-05	0.4521	1.9026	0.5034	1.628	-0.101907	0.168673	0	0	-0.116505	0.0178571
Nxt1	26.0977	971.433	15.7471	0	29.1858	1942.37	25.6967	2.24e-25	0.0162	25.4006	0.0262	0.0132	28.7453	0.0148	-0.2931	0.1785	-0.8208	0	0	0	2.11e-05	0.411	1.9919	0.3816	1.9121	0.077044	0.0417342	0	0	-0.116356	0.227273
Ddx5	33.6981	896.164	49.7908	0	37.6317	1501.43	78.6622	0	0.0556	32.4544	0.0362	0.0526	36.6945	0.0245	-0.0792	0.1771	-0.5653	0	0	0	2.15e-05	1.8007	0.6602	1.927	0.5484	-0.0655423	0.203866	0	0	-0.115551	0.0570342
Atg101	26.8275	1510.44	29.2953	0	30.4917	1319.76	24.5991	0	0.0194	26.3423	0.0176	0.0187	29.7779	0.0225	-0.0516	0.1769	0.3612	2.53e-17	0	0	5.13e-05	0.5101	1.7785	0.5522	1.5654	-0.0762405	0.136131	0	0	-0.115374	0.0374332
Cfap20	29.5468	583.79	3.451	5.53e-07	32.4317	1563.04	9.5187	8.32e-10	0.0059	28.1084	0.0481	0.0061	31.7552	0.0203	0.0431	0.176	-1.2453	3.14e-10	0	0	1.71e-05	0.1655	3.2428	0.1929	2.7469	-0.142043	0.180531	0	0	-0.114841	-0.0327869
Ndufa6	28.829	492.653	16.3799	0	31.2457	2012.36	67.1068	0	0.0332	27.2173	0.0553	0.0333	30.7458	0.0154	0.0006	0.1759	-1.8485	5.73e-05	0	0	4.95e-11	0.9023	1.2217	1.019	1.015	-0.114524	0.203645	0	0	-0.114764	-0.003003
S1pr4	28.6629	1200.5	6.6568	1.41e-08	31.852	4217.25	39.0675	4.36e-23	0.0055	27.9786	0.0234	0.0092	31.5989	0.0076	0.7356	0.1756	-1.6234	0	0	0	4.8e-11	0.1553	3.4816	0.2933	2.305	-0.470508	0.510456	0	0	-0.11457	-0.402174
Ccnd3	27.1767	544.423	16.2	0	29.8924	1294.73	44.2769	0	0.0298	25.8701	0.0475	0.0342	29.2082	0.0226	0.1993	0.1751	-1.0718	0	0	0	1.46e-23	0.7682	1.3729	0.9983	1.0515	-0.230492	0.305659	0	0	-0.114286	-0.128655
Idh3a	27.6305	1654.7	21.11	2.25e-24	31.6595	991.715	11.1938	1.89e-22	0.0127	27.1519	0.0165	0.0113	30.6505	0.0309	-0.1679	0.1749	0.9011	0	0	0	0.000118	0.3427	2.1855	0.3435	2.0038	-0.00232897	0.0906777	0	0	-0.114145	0.123894
Hn1	25.8605	245.473	7.2644	0	27.1899	921.144	22.2725	0	0.0296	23.3811	0.0954	0.0242	26.3932	0.0287	-0.2907	0.1748	-1.7343	0	0	0	3.4e-05	0.6907	1.502	0.6365	1.4551	0.0851532	0.0322315	0	0	-0.114124	0.22314
Spc24	27.7508	758.406	12.0804	0	31.1428	1020.8	12.3177	0	0.016	26.7577	0.0353	0.0121	30.198	0.0296	-0.4002	0.1745	-0.254	0	0	0	9.72e-09	0.4257	1.9931	0.3624	2.111	0.174669	-0.0558503	0	0	-0.113925	0.322314
Fam103a1	27.7993	649.18	21.9368	0	30.7494	1352.04	37.2907	0	0.0338	26.6349	0.0412	0.0275	30.0412	0.0223	-0.2942	0.1736	-0.8838	0	0	0	5.83e-08	0.8953	1.2232	0.8245	1.1861	0.0858702	0.031279	0	0	-0.113388	0.229091
Cfdp1	26.3715	2415.85	20.2831	1.19e-11	29.9537	1676.23	11.0234	1.03e-08	0.0084	26.0768	0.0108	0.0066	29.401	0.0175	-0.351	0.1731	0.7002	0	0	0	1.2e-07	0.2202	2.7877	0.1918	2.776	0.148071	0.0042147	0	0	-0.113064	0.272727
2810417H13Rik	23.0746	224.542	8.4411	0	25.4637	315.652	8.0996	0	0.0375	20.8849	0.0938	0.0256	23.5429	0.0748	-0.5496	0.1728	-0.3252	0	0	0	1.67e-15	0.7802	1.5377	0.603	1.7465	0.293864	-0.119553	0	0	-0.1129	0.464844
Becn1	27.8182	936.192	11.8392	1.2e-26	31.0408	1609.62	19.258	4.49e-23	0.0126	26.9972	0.0289	0.012	30.4304	0.0189	-0.0749	0.1727	-0.6149	9.35e-19	0	0	0.000121	0.3401	2.2212	0.3614	1.9801	-0.0589375	0.121762	0	0	-0.112821	0.05
Mcrs1	28.572	1803	15.6334	3.76e-14	32.166	2156	16.5741	2.64e-13	0.0087	28.1123	0.0157	0.0077	31.6799	0.0147	-0.1739	0.1724	-0.0895	0	0	0	1.85e-05	0.2441	2.6721	0.2435	2.4558	0.00246407	0.0880772	0	0	-0.112614	0.12987
Ash2l	29.3445	1402.74	7.5932	5.97e-08	32.83	2400.18	13.7108	2.81e-09	0.0054	28.7243	0.0205	0.0057	32.365	0.0135	0.0752	0.1722	-0.6006	1.52e-19	0	0	1.27e-05	0.1555	3.2937	0.1848	2.8058	-0.15855	0.17389	0	0	-0.112489	-0.0526316
U2af2	28.1279	858.822	7.4747	4.8e-15	31.903	807.369	7.1215	1.73e-12	0.0087	27.2199	0.0317	0.0089	30.6687	0.0379	0.0285	0.1721	0.2585	5.85e-08	0	0	6.44e-05	0.2368	2.6393	0.2706	2.2885	-0.124908	0.153288	0	0	-0.112453	-0.0224719
Smc6	28.1511	691.342	7.0059	3.28e-18	31.1374	1413.87	20.2591	0	0.0102	27.0333	0.039	0.0143	30.4576	0.0216	0.4936	0.1721	-0.8534	0	0	0	3.49e-15	0.2739	2.5068	0.437	1.7944	-0.373227	0.397013	0	0	-0.112428	-0.286713
Ndufa13	30.5745	3113.74	95.3607	0	34.3349	5031.58	158.893	0	0.0305	30.2589	0.0098	0.0315	34.0851	0.0068	0.0447	0.1718	-0.5265	3.25e-07	0	0	6.19e-16	0.9271	1.2097	1.0783	0.9632	-0.140221	0.255918	0	0	-0.112254	-0.031746
Gm10282	25.8377	628.476	16.1378	0	28.6735	1105	20.8586	0	0.0257	24.8058	0.0396	0.0188	27.92	0.0255	-0.45	0.1706	-0.6347	0	0	0	5.26e-12	0.6358	1.4931	0.5208	1.5768	0.220814	-0.0530822	0	0	-0.11154	0.367021
Mrps17	27.2164	1137.62	14.8827	3e-26	30.3969	1886.88	26.85	0	0.0131	26.5696	0.0234	0.0142	29.9041	0.0159	0.1231	0.1706	-0.5621	0	0	0	3.41e-07	0.3482	2.2078	0.4266	1.7928	-0.183779	0.231481	0	0	-0.111506	-0.0774648
Tmbim4	24.2947	432.45	9.8127	0	27.1391	552.798	11.6573	0	0.0227	22.9847	0.0533	0.0211	25.8561	0.0468	-0.1032	0.1698	-0.1876	0	0	0	3.32e-05	0.5198	1.7831	0.5426	1.5732	-0.0420199	0.133422	0	0	-0.111053	0.0758294
Gpx1	46.5537	3662.19	249.456	0	52.6781	2847.75	175.55	0	0.0684	45.9464	0.0125	0.0622	51.677	0.0181	-0.1368	0.1696	0.5295	0	0	0	0.000156	3.1323	0.3072	3.1828	0.2436	-0.0158665	0.261084	0	0	-0.110893	0.0996785
Me2	27.9539	1413.98	14.0889	5.14e-23	31.5177	1362.1	12.6002	5.24e-15	0.01	27.3863	0.0194	0.0093	30.792	0.0226	-0.1075	0.1691	0.2227	0	0	0	6.3e-05	0.2711	2.5417	0.2844	2.2575	-0.0467651	0.125891	0	0	-0.110603	0.0752688
Copb2	27.6461	4526.13	26.3039	2.51e-07	31.3845	1947.87	13.5143	7.35e-11	0.0058	27.4596	0.0061	0.0069	30.8727	0.0159	0.2623	0.169	1.3683	0	0	0	1.45e-05	0.1604	3.2777	0.214	2.6285	-0.250467	0.246985	0	0	-0.110554	-0.15942
Rpl18a	47.5182	1892.53	141.148	0	52.708	4617.54	320.324	0	0.075	46.3238	0.0244	0.0701	52.0572	0.0112	-0.0967	0.1683	-1.1236	2.16e-17	0	0	3.14e-09	3.4509	0.2887	3.5812	0.2462	-0.0363845	0.172624	0	0	-0.110137	0.0699001
Rab24	28.758	384.319	7.6116	0	31.2056	811.109	16.9702	0	0.0199	26.7301	0.0694	0.021	30.0371	0.037	0.0739	0.1683	-0.9069	0	0	0	2.74e-09	0.5256	1.7551	0.627	1.4372	-0.161722	0.221194	0	0	-0.110097	-0.052381
Clta	28.5616	434.487	17.5438	0	30.9884	1040.2	47.4079	0	0.0404	26.7634	0.0616	0.0457	30.0692	0.0289	0.1768	0.168	-1.0932	0	0	0	0	1.0687	1.0844	1.3657	0.804	-0.217471	0.348756	0	0	-0.10994	-0.115974
Egln2	26.1541	2154.01	17.2094	8.87e-14	30.6984	532.312	4.1255	4.55e-10	0.008	25.8318	0.0121	0.0078	29.0112	0.0545	-0.0397	0.1675	2.1732	5.82e-13	0	0	2.15e-05	0.2066	2.9507	0.2242	2.5978	-0.0785013	0.135846	0	0	-0.109592	0.025641
Capg	27.5207	514.253	21.5177	0	29.7716	1906.55	72.9814	0	0.0418	26.1031	0.0509	0.0383	29.3012	0.0154	-0.1253	0.1667	-1.7271	0	0	0	0.000189	1.0878	1.1341	1.1238	1.029	-0.0320342	0.102138	0	0	-0.109146	0.0913838
Arl1	27.0661	798.312	9.6106	1.74e-25	30.0732	1306.87	14.1822	1.76e-20	0.012	26.1682	0.0328	0.0108	29.3706	0.0227	-0.1557	0.1666	-0.532	0	0	0	7.1e-05	0.315	2.3055	0.3167	2.0939	-0.00536786	0.101055	0	0	-0.109034	0.111111
Arpc1b	42.8692	1426.2	96.5428	0	47.5804	2507.39	156.056	0	0.0681	41.5842	0.0291	0.0627	46.6605	0.0186	-0.1199	0.1662	-0.6462	4.91e-27	0	0	2.75e-05	2.803	0.3397	2.9044	0.2587	-0.0349125	0.313104	0	0	-0.108792	0.0861244
Os9	27.541	1630.37	22.2057	0	30.7385	2673.28	35.9612	0	0.0136	27.0725	0.0166	0.0134	30.3757	0.0114	-0.0196	0.1661	-0.5464	1.36e-14	0	0	7.97e-05	0.3697	2.1309	0.4073	1.8689	-0.0923152	0.140189	0	0	-0.108745	0.0149254
Hdac1	28.0799	589.948	9.4768	0	31.2405	790.756	13.6035	0	0.016	26.7727	0.0455	0.0173	30.032	0.0379	0.1125	0.1657	-0.2647	7.34e-22	0	0	1.24e-07	0.4274	1.9125	0.5145	1.5794	-0.169291	0.210903	0	0	-0.108528	-0.0751445
Hacd2	28.499	555.365	6.5101	0	30.9204	1788.89	18.6502	7.32e-22	0.0118	27.0869	0.0487	0.0104	30.3798	0.017	-0.1771	0.1655	-1.5191	0	0	0	5.69e-05	0.3166	2.353	0.3165	2.1803	0.000315956	0.0792093	0	0	-0.108391	0.134615
Srrm2	28.513	1713.81	17.6208	1.19e-24	32.136	1499.39	23.4716	0	0.0103	28.0402	0.0164	0.0157	31.4473	0.021	0.6075	0.1654	0.356	0	0	0	6.51e-22	0.2887	2.5158	0.4918	1.7124	-0.412973	0.469166	0	0	-0.108343	-0.343949
2510039O18Rik	28.4373	791.702	6.3287	3.55e-16	31.231	2159.19	13.9408	1.75e-09	0.008	27.4385	0.0347	0.0064	30.7711	0.0143	-0.3102	0.1654	-1.2781	0	0	0	4.91e-07	0.219	2.8445	0.1988	2.7737	0.10161	0.0255255	0	0	-0.108303	0.25
B4galnt1	27.9985	533.239	17.5958	0	30.7416	1024.79	32.6702	0	0.033	26.5872	0.0499	0.032	29.8088	0.029	-0.0466	0.165	-0.7804	4.33e-21	0	0	7.38e-08	0.8762	1.2384	0.9365	1.0741	-0.0643887	0.152965	0	0	-0.108075	0.03125
Cflar	28.4302	384.369	2.7662	1.02e-11	31.8308	439.536	3.0467	1.47e-09	0.0072	26.4609	0.069	0.007	29.661	0.0674	-0.045	0.1647	-0.0336	0	0	2.11e-25	1.01e-05	0.1901	3.1162	0.205	2.7509	-0.0726829	0.132793	0	0	-0.107889	0.0285714
Prkar1a	24.81	181.089	7.9885	0	26.3398	342.625	11.7166	0	0.0441	21.79	0.1206	0.0342	24.4248	0.0714	-0.3673	0.1647	-0.7557	0	0	0	7.59e-14	0.9569	1.1552	0.8271	1.1685	0.156934	-0.0113821	0	0	-0.107874	0.289474
Psmc4	26.6353	653.047	13.1906	0	29.1932	1619.32	30.8374	0	0.0202	25.5679	0.0392	0.019	28.6537	0.0178	-0.0871	0.1644	-1.1411	1.4e-20	0	0	2.26e-05	0.5134	1.7566	0.5426	1.5497	-0.053815	0.13351	0	0	-0.107693	0.0631579
Sin3b	26.5331	567.796	13.2293	0	29.1951	1066.58	27.7446	0	0.0233	25.3395	0.0447	0.026	28.3885	0.0267	0.1582	0.1639	-0.7448	0	0	0	9.49e-15	0.5901	1.6379	0.733	1.294	-0.194952	0.265765	0	0	-0.107403	-0.103846
Eya1	25.7559	252.473	2.2481	4.55e-14	26.7973	1112.71	11.2413	3.31e-17	0.0089	23.3481	0.093	0.0101	26.1494	0.0235	0.1844	0.1635	-1.9844	0	0	0	1.22e-05	0.2067	3.0013	0.2631	2.4076	-0.214367	0.246594	0	0	-0.107127	-0.118812
0610012G03Rik	27.2205	1157.44	20.7971	0	30.3601	1601.81	25.257	0	0.018	26.5845	0.023	0.0157	29.7722	0.0186	-0.1898	0.1634	-0.305	0	0	0	0.000149	0.4778	1.8833	0.4665	1.7447	0.0242229	0.0794406	0	0	-0.10707	0.146497
Pqlc3	28.0106	530.482	3.5626	1e-15	30.4149	1484.31	13.2277	1.66e-15	0.0067	26.5945	0.0501	0.0089	29.7824	0.02	0.4094	0.1633	-1.3224	0	0	0	1.42e-06	0.1778	3.2204	0.2634	2.4436	-0.324981	0.317892	0	0	-0.10704	-0.247191
Id1	25.436	549.141	14.3173	0	28.2033	788.386	24.283	0	0.0261	24.2966	0.0442	0.0308	27.2059	0.0345	0.2383	0.1632	-0.3577	0	0	0	8.9e-20	0.6328	1.6734	0.8347	1.2814	-0.241883	0.305915	0	0	-0.106936	-0.152597
Sla	26.2722	1019.02	11.684	1.92e-24	29.0571	2228.42	35.9868	0	0.0115	25.6045	0.0251	0.0161	28.6623	0.013	0.4845	0.1628	-0.9504	0	0	0	2.55e-14	0.2944	2.4714	0.4596	1.802	-0.359443	0.371476	0	0	-0.106684	-0.285714
Tcn2	27.9472	577.032	9.221	0	30.4537	1478.78	24.0633	0	0.016	26.6454	0.0462	0.0163	29.8212	0.0201	0.0307	0.1625	-1.1969	4.05e-06	0	0	1.02e-06	0.425	1.9833	0.4864	1.6598	-0.126234	0.194903	0	0	-0.106495	-0.0184049
Tmed3	26.4439	423.037	19.3613	0	28.7429	879.568	33.8707	0	0.0457	24.864	0.0589	0.0385	27.8067	0.0316	-0.2466	0.1614	-0.8977	0	0	0	5.38e-09	1.1311	1.0684	1.0609	1.0182	0.0661702	0.0493027	0	0	-0.105827	0.187013
Fam105a	27.5149	247.39	2.6123	5.87e-22	27.9922	2426.31	30.5359	5.19e-27	0.0106	24.7318	0.1003	0.0126	27.6556	0.0114	0.2556	0.1612	-3.1358	0	0	0	1.2e-07	0.2599	2.6851	0.3494	2.0674	-0.256153	0.298781	0	0	-0.105722	-0.15873
Ccl6	22.0812	82.6699	1.5519	0	20.7893	306.244	8.0358	0	0.0188	17.4	0.211	0.0262	19.4517	0.0639	0.4811	0.1608	-1.7231	0	0	0	3.53e-08	0.3261	2.956	0.5088	2.2301	-0.35908	0.325501	0	0	-0.105477	-0.282443
Rps23	39.6547	1745.88	124.061	0	44.5782	1539.62	106.547	0	0.0712	38.7385	0.0222	0.0694	43.3028	0.0281	-0.0376	0.1607	0.3406	0.000296	0	0	1.61e-23	2.7382	0.4307	2.9945	0.3507	-0.0855902	0.228115	0	0	-0.105404	0.0259366
Rpl31	31.5407	1483.55	75.0476	0	35.5411	1195.67	67.3028	0	0.0508	30.8627	0.0208	0.0564	34.4952	0.0288	0.1516	0.1605	0.4723	0	0	0	0	1.56	0.7977	1.9393	0.569	-0.195586	0.401933	0	0	-0.105305	-0.0992908
Galk1	28.0058	471.754	3.5373	1.76e-11	29.9596	2065.47	16.8401	2.08e-12	0.0075	26.4173	0.056	0.0082	29.5235	0.0143	0.1195	0.1604	-1.9686	0	0	0	2.19e-05	0.1965	2.9857	0.2417	2.434	-0.187009	0.226664	0	0	-0.105211	-0.0853659
Rpl10	47.3738	3577.41	223.625	0	52.8087	4963.94	308.102	0	0.0625	46.7223	0.0131	0.0624	52.211	0.0105	-0.0017	0.1602	-0.32	2.02e-12	0	0	0	2.9099	0.3696	3.226	0.2931	-0.0979851	0.261003	0	0	-0.105125	0.00160256
Ethe1	27.3993	1508.63	21.1209	0	30.4299	2543.34	39.2848	0	0.014	26.8901	0.0179	0.0154	30.0469	0.0119	0.1363	0.1601	-0.588	0	0	0	5.71e-07	0.3761	2.1614	0.4614	1.7722	-0.184872	0.219614	0	0	-0.105062	-0.0909091
Degs1	23.5009	581.957	15.0025	0	25.9506	927.77	27.86	0	0.0258	22.5816	0.0389	0.0299	25.2275	0.0275	0.2162	0.1598	-0.504	0	0	0	2.15e-13	0.5828	1.6705	0.754	1.3369	-0.227056	0.249533	0	0	-0.104882	-0.137124
Tfg	27.7544	901.104	9.0187	1.57e-15	30.3535	3285.9	29.045	5.9e-15	0.01	26.9012	0.0299	0.0088	30.0511	0.0092	-0.1841	0.1597	-1.7002	0	0	0	1.12e-05	0.2677	2.4964	0.2646	2.3771	0.0117158	0.0501872	0	0	-0.104818	0.136364
Rpl3	44.4276	3505.9	245.535	0	49.5544	4265.42	271.382	0	0.0705	43.8346	0.0125	0.0637	48.9533	0.0115	-0.1449	0.1593	-0.1208	0	0	0	0.00254	3.0618	0.3765	3.1098	0.3711	-0.0154351	0.0145513	0	0	-0.104563	0.10675
Rpa1	28.4104	505.458	3.4542	1.22e-10	30.7313	1309.37	11.1252	5.14e-15	0.0068	26.8782	0.0532	0.0085	30.0146	0.0229	0.3172	0.1592	-1.2146	0	0	0	2.27e-06	0.1817	3.088	0.2549	2.3745	-0.287171	0.300484	0	0	-0.104496	-0.2
Commd4	30.8753	1926.92	21.7593	0	34.6543	1630.81	16.7768	3.37e-24	0.0113	30.3674	0.0158	0.0103	33.9094	0.0208	-0.1352	0.1592	0.4017	0	0	0	0.000114	0.3417	2.2891	0.3463	2.0686	-0.0132833	0.106594	0	0	-0.104455	0.0970874
Cpsf4	27.8642	533.289	3.8479	4.96e-13	30.4118	1032.49	8.2472	7.88e-12	0.0072	26.4504	0.0498	0.008	29.5341	0.0286	0.1511	0.1591	-0.7992	0	0	0	2.07e-05	0.1892	3.0998	0.2361	2.5557	-0.198645	0.212897	0	0	-0.104412	-0.1
Yy1	29.6592	883.07	6.0384	2.46e-13	32.4848	2388.54	23.2865	1.06e-17	0.0068	28.6834	0.0325	0.0097	32.0259	0.0135	0.5095	0.159	-1.2724	0	0	0	1.91e-09	0.195	3.0319	0.3106	2.1801	-0.372183	0.390716	0	0	-0.104369	-0.298969
Eif4a3	30.0069	733.507	10.326	0	32.7559	1847.1	24.1491	0	0.0141	28.8119	0.0393	0.0131	32.1669	0.0174	-0.1059	0.1589	-1.175	0	0	0	0.000186	0.4042	1.9964	0.4205	1.7948	-0.0387634	0.112324	0	0	-0.1043	0.0763359
Supt4a	26.782	598.129	17.0363	0	29.4286	1041.08	25.0881	0	0.0285	25.6189	0.0431	0.0241	28.6012	0.0275	-0.2413	0.1589	-0.6478	0	0	0	1.82e-05	0.7294	1.4535	0.685	1.3954	0.0648175	0.0416368	0	0	-0.104272	0.182573
Snx3	25.9852	1540.67	43.215	0	29.0265	1621.38	37.9356	0	0.028	25.5391	0.0168	0.0234	28.4999	0.0176	-0.2585	0.1582	0.0724	0	0	4.11e-18	1.12e-06	0.715	1.4446	0.6654	1.3581	0.0745416	0.0636919	0	0	-0.103888	0.196581
Asah1	26.1769	355.827	10.2723	0	28.6774	531.208	14.5923	0	0.0289	24.3695	0.0685	0.0274	27.1888	0.0514	-0.0755	0.1579	-0.4125	0	0	0	1.41e-05	0.701	1.4914	0.7454	1.3231	-0.0595653	0.127201	0	0	-0.103693	0.0547445
Mad2l1	28.6234	2466.58	21.4358	9.96e-14	31.8303	3776.17	24.5234	6.33e-11	0.0087	28.284	0.0115	0.0065	31.5512	0.0084	-0.4194	0.1577	-0.458	0	0	0	6.15e-08	0.2465	2.6481	0.2059	2.6627	0.197183	-0.00548316	0	0	-0.103552	0.338462
Calm3	26.1387	1107.11	43.3014	0	29.1265	1277.85	39.974	0	0.0391	25.5215	0.0231	0.0313	28.4682	0.0223	-0.3223	0.1576	-0.0522	0	0	4.38e-18	1.2e-11	0.9989	1.1392	0.8897	1.127	0.122738	0.0108252	0	0	-0.103508	0.249201
Paics	29.6152	794.841	8.0113	1.22e-22	32.4719	1639.22	16.2589	7.59e-21	0.0101	28.5313	0.0359	0.0099	31.8227	0.0195	-0.0292	0.1575	-0.8803	0.00148	0	0	5.94e-05	0.2863	2.4472	0.3144	2.1136	-0.0893766	0.157835	0	0	-0.103429	0.020202
Ube2j2	27.5422	873.969	25.0212	0	30.0566	3326.96	68.3199	0	0.0286	26.6924	0.0308	0.0205	29.7712	0.009	-0.4811	0.1575	-1.7817	0	0	0	2.34e-14	0.7644	1.3794	0.6134	1.4351	0.246169	-0.0388126	0	0	-0.103415	0.395122
Ccdc34	26.9652	1515.28	12.4443	6.81e-16	30.1931	1347.16	12.1151	5.36e-18	0.0082	26.4739	0.0175	0.009	29.5096	0.0219	0.1309	0.1566	0.3245	0	0	0	3.62e-05	0.2169	2.8548	0.2645	2.4095	-0.179962	0.18481	0	0	-0.102872	-0.0888889
Cks1b	26.1009	199.49	4.8412	0	26.1459	1550.49	31.2621	0	0.0243	23.0589	0.1156	0.0202	25.7029	0.0166	-0.2683	0.1566	-2.7997	0	0	0	6.74e-05	0.5583	1.7265	0.5188	1.6807	0.0761372	0.0272506	0	0	-0.102868	0.20297
Snrpg	26.9098	542.97	18.3421	0	29.6238	803.475	26.2368	0	0.0339	25.6211	0.0471	0.0327	28.5563	0.0355	-0.0515	0.1565	-0.4077	7.95e-13	0	0	8.13e-06	0.8625	1.2213	0.9312	1.0734	-0.0737758	0.137786	0	0	-0.102786	0.0366972
Myb	28.9615	1124.9	16.5674	0	31.8421	2662.53	38.6244	0	0.0147	28.2199	0.0251	0.0145	31.4462	0.0119	-0.0235	0.1562	-1.0823	0.00169	0	0	2.87e-05	0.4143	1.9952	0.4554	1.7203	-0.0902503	0.159798	0	0	-0.102597	0.0137931
Nsrp1	28.7602	359.32	2.8599	7.6e-15	30.1727	1792.87	14.4284	5.99e-13	0.008	26.6161	0.0741	0.008	29.6531	0.0166	0.0107	0.1559	-2.1595	0.00547	0	0	2.89e-05	0.212	2.9724	0.237	2.5599	-0.105485	0.161139	0	0	-0.102418	0
Bax	26.4651	651.484	18.2635	0	29.6515	632.939	15.641	0	0.0279	25.405	0.0392	0.0247	28.3025	0.0449	-0.1784	0.1558	0.1938	0	0	0	2.81e-05	0.7069	1.466	0.6976	1.3492	0.0133314	0.0865698	0	0	-0.102376	0.129555
Mapkapk3	27.0784	585.051	6.6515	1.27e-20	29.7721	914.149	12.487	9.32e-25	0.0114	25.8697	0.0444	0.0137	28.8137	0.0315	0.2657	0.1555	-0.4941	0	0	0	6.53e-09	0.2937	2.422	0.3918	1.8664	-0.250383	0.297685	0	0	-0.102174	-0.167883
Bid	28.0497	581.391	6.2461	5.98e-20	30.396	1497.93	18.4684	3.73e-24	0.0107	26.7418	0.0463	0.0123	29.7728	0.0199	0.197	0.1549	-1.2185	0	0	0	4.02e-07	0.2867	2.4611	0.3665	1.9588	-0.217735	0.256433	0	0	-0.101804	-0.130081
Fgfr1op2	27.972	186.006	2.8911	0	27.8225	1011.18	19.492	0	0.0156	24.3048	0.1307	0.0192	27.0521	0.0269	0.3049	0.1545	-2.281	0	0	0	1.32e-14	0.3773	2.1522	0.5177	1.6153	-0.2712	0.332384	0	0	-0.101556	-0.1875
Tmem230	27.7966	206.551	2.0145	1.08e-17	27.7165	1711.49	14.4439	8.36e-15	0.0098	24.4826	0.1185	0.0084	27.2472	0.016	-0.2231	0.1543	-2.89	0	0	0	4.56e-06	0.2373	2.7265	0.2283	2.5675	0.0394218	0.0619279	0	0	-0.101464	0.166667
Rps27l	24.3277	485.176	16.7861	0	27.7108	368.882	10.5222	0	0.0345	23.1424	0.048	0.0286	25.7494	0.0697	-0.2732	0.154	0.5382	0	0	0	1.75e-07	0.7981	1.341	0.7304	1.3049	0.0926889	0.027665	0	0	-0.101245	0.206294
Cdc42ep3	26.4951	601.761	8.3217	0	29.0017	1046.36	15.628	0	0.0138	25.3462	0.0427	0.0149	28.195	0.027	0.1155	0.1537	-0.6587	0	0	0	3.08e-06	0.3474	2.2546	0.4191	1.8739	-0.171081	0.203159	0	0	-0.101039	-0.0738255
Manf	26.3866	475.13	14.2182	0	28.3552	1426.17	41.383	0	0.0299	24.9818	0.0527	0.029	27.7889	0.0195	-0.0454	0.1536	-1.4298	8.48e-19	0	0	1.39e-05	0.7457	1.4372	0.8042	1.2674	-0.0727431	0.133975	0	0	-0.101015	0.0310345
Ruvbl1	27.7159	573.5	4.5247	9.29e-14	30.5627	779.82	6.2092	2.44e-09	0.0079	26.4147	0.0461	0.0079	29.382	0.038	0.0071	0.1536	-0.2764	2.11e-08	0	0	3.41e-05	0.207	2.872	0.2326	2.4541	-0.11006	0.170286	0	0	-0.10099	0
Arhgef1	25.5342	648.935	9.6165	0	27.804	1609.73	28.675	0	0.0148	24.5577	0.0379	0.0178	27.3136	0.017	0.2652	0.1534	-1.1563	0	0	0	2.85e-11	0.3625	2.1625	0.4844	1.67	-0.251652	0.29491	0	0	-0.100898	-0.168539
Pfdn1	28.8766	723.396	10.3065	0	31.3997	1865.61	23.778	1.7e-24	0.0143	27.7497	0.0384	0.0128	30.8633	0.0165	-0.1575	0.1534	-1.2147	0	0	0	9.77e-05	0.3942	2.0603	0.3935	1.8726	0.00177891	0.100235	0	0	-0.100884	0.117187
Ccdc180	27.256	422.612	4.8302	0	29.5676	767.483	14.553	0	0.0114	25.5874	0.0608	0.019	28.4583	0.0371	0.7299	0.1534	-0.7113	0	0	0	0	0.2924	2.4738	0.5381	1.6273	-0.456607	0.520187	0	0	-0.100881	-0.4
2700060E02Rik	25.2912	379.959	7.9099	0	28.2403	397.109	8.7242	0	0.0208	23.6859	0.0628	0.0219	26.3417	0.0666	0.0798	0.1533	0.0839	0	0	9.13e-26	3.2e-08	0.4911	1.8483	0.5765	1.5261	-0.148135	0.211126	0	0	-0.100821	-0.0502283
Mtch1	28.4889	418.247	2.7719	6.37e-12	31.2779	570.399	3.7497	1.51e-10	0.0067	26.6551	0.0636	0.0066	29.642	0.052	-0.0157	0.1532	-0.291	5.6e-09	0	0	9.83e-06	0.1755	3.143	0.195	2.7894	-0.1	0.126766	0	0	-0.100766	0.0151515
Tm2d1	27.1935	566.723	7.2608	0	29.8173	908.853	9.0954	7.81e-20	0.0128	25.9421	0.0458	0.01	28.8448	0.0318	-0.3585	0.153	-0.5274	0	0	0	4.66e-07	0.3321	2.3336	0.2871	2.3198	0.15674	0.00594879	0	0	-0.100632	0.28
Cnpy2	26.3411	817.412	8.6225	1.85e-14	28.7706	2049.44	19.0228	7.3e-13	0.0106	25.504	0.0312	0.0093	28.3524	0.0139	-0.1874	0.1527	-1.1697	0	0	0	2.65e-05	0.2685	2.5695	0.2622	2.3415	0.0240275	0.0973735	0	0	-0.100464	0.139785
Snrnp40	27.0405	497.791	10.4897	0	29.0159	1660.69	31.5036	0	0.0211	25.6264	0.0516	0.0189	28.4875	0.0172	-0.1537	0.1527	-1.5825	0	0	0	2.36e-05	0.5369	1.6945	0.5354	1.529	0.00280164	0.108241	0	0	-0.100434	0.116402
2310036O22Rik	26.7317	804.913	17.3548	0	29.3216	1488.85	38.2872	0	0.0215	25.8515	0.0323	0.0257	28.7327	0.0194	0.2544	0.1524	-0.7341	0	0	0	1.49e-19	0.5545	1.6903	0.7363	1.2842	-0.24691	0.316228	0	0	-0.100276	-0.163424
Pcmt1	29.0459	437.256	8.1498	0	30.5734	2766.31	49.8239	0	0.0186	27.1997	0.0624	0.018	30.2308	0.011	-0.049	0.1524	-2.5074	2.03e-08	0	0	2.07e-05	0.5031	1.7828	0.5442	1.5571	-0.0755237	0.144949	0	0	-0.100265	0.0333333
Tsfm	26.4947	663.803	6.2453	9.66e-18	28.6454	2346.61	22.0319	7.68e-15	0.0094	25.4569	0.0384	0.0094	28.2902	0.0121	-0.0028	0.1522	-1.6691	1.38e-08	0	0	5.47e-05	0.2378	2.7125	0.2662	2.3248	-0.106687	0.166767	0	0	-0.100151	0
Nt5c	26.6223	773.476	13.0733	0	30.1797	542.116	10.9646	0	0.0169	25.7181	0.0334	0.0203	28.5723	0.0527	0.2671	0.1518	0.6576	0	0	0	4.87e-14	0.4343	1.975	0.5773	1.5178	-0.247705	0.301225	0	0	-0.099894	-0.167488
Gm9843	32.7081	1530.73	81.1676	0	36.2757	1865.46	97.113	0	0.053	32.0104	0.0209	0.0519	35.5575	0.0191	-0.0295	0.1516	-0.1298	1.54e-17	0	0	1.41e-06	1.6949	0.6845	1.8398	0.5625	-0.0787586	0.216889	0	0	-0.0997567	0.0211946
Ten1	27.2464	261.572	3.1624	8.46e-25	28.2188	947.819	11.1448	9.54e-22	0.0121	24.667	0.0943	0.0118	27.3897	0.0289	-0.0392	0.1511	-1.7061	2.06e-19	0	0	6.37e-05	0.2968	2.4612	0.3215	2.1377	-0.0768274	0.151331	0	0	-0.099406	0.0254237
Laptm4a	26.5057	311.596	5.9106	0	28.8371	458.701	9.1368	0	0.019	24.4156	0.0784	0.0199	27.1059	0.0592	0.0695	0.1508	-0.4068	1.78e-23	0	0	1.27e-05	0.4628	1.9206	0.5369	1.6487	-0.138015	0.164918	0	0	-0.0992515	-0.0452261
BC004004	28.2241	487.101	5.6739	0	29.9988	2209.24	23.1049	1.53e-20	0.0116	26.6458	0.0549	0.0105	29.5806	0.0134	-0.1536	0.1507	-2.0323	0	0	0	6.27e-05	0.3078	2.3607	0.3096	2.1485	-0.00581395	0.0987666	0	0	-0.0992137	0.104762
Commd3	30.3234	331.32	5.6677	0	32.1286	744.755	11.5772	0	0.0172	27.7387	0.0836	0.0156	30.788	0.0413	-0.1383	0.1505	-1.0172	0	0	0	0.000134	0.4705	1.8624	0.4784	1.686	-0.0165134	0.104626	0	0	-0.0990418	0.102564
Syf2	26.612	842.762	24.1099	0	29.2316	1360.56	30.8112	0	0.0286	25.7699	0.0306	0.0226	28.599	0.0211	-0.3376	0.1503	-0.541	0	0	0	2.93e-08	0.7298	1.4299	0.6454	1.4189	0.130772	0.00775248	0	0	-0.098923	0.265487
Vasp	29.8797	1612.14	62.428	0	33.2706	1503.2	60.6869	0	0.0386	29.3177	0.0183	0.0404	32.5361	0.0217	0.0626	0.1503	0.243	0	0	0	6.51e-12	1.1332	1.0305	1.3143	0.8541	-0.137792	0.206533	0	0	-0.0989178	-0.0445545
Ubxn8	27.494	3424.82	25.6693	4.94e-14	30.9175	1442.31	9.8475	4.53e-10	0.0075	27.2603	0.008	0.0069	30.2527	0.021	-0.1252	0.1503	1.3882	0	0	0	1.03e-05	0.2047	2.978	0.2061	2.6688	-0.00679282	0.115857	0	0	-0.0989135	0.0869565
Arhgap15	28.4544	854.591	15.9742	0	31.2966	1256.33	23.6712	0	0.0187	27.5111	0.0322	0.0189	30.5218	0.0243	0.0115	0.1498	-0.4077	1.78e-12	0	0	8.67e-07	0.5106	1.7654	0.5758	1.5019	-0.113234	0.175444	0	0	-0.098641	-0.010582
Mrps33	27.1861	882.956	21.3205	0	29.6159	2281.06	48.1278	0	0.0241	26.3427	0.0301	0.0211	29.219	0.0129	-0.1931	0.1495	-1.2222	0	0	0	1.11e-05	0.6319	1.5574	0.6157	1.4329	0.0263115	0.0868867	0	0	-0.0984394	0.14218
Ifi27	28.4099	1159.68	12.3549	0	31.0771	2980.48	22.2217	9.56e-16	0.0106	27.7191	0.024	0.0075	30.7376	0.0103	-0.5125	0.1491	-1.2161	0	0	0	2.04e-09	0.2941	2.5461	0.2275	2.6885	0.292747	-0.0529663	0	0	-0.0982022	0.413333
Snx5	28.92	2303.42	18.1946	1.09e-15	32.5422	1197.11	9.4209	1.08e-12	0.0079	28.553	0.0124	0.0079	31.6555	0.0264	0.0062	0.1488	1.0862	6.35e-17	0	0	3.97e-05	0.2253	2.8335	0.2486	2.4391	-0.0937249	0.161699	0	0	-0.0980082	0
Anxa11	28.4031	649.566	15.5113	0	30.8375	1414.44	41.6383	0	0.0239	27.2006	0.0418	0.0295	30.1529	0.0213	0.3031	0.1487	-0.9745	0	0	0	1.14e-25	0.6487	1.5117	0.8822	1.1384	-0.264679	0.327916	0	0	-0.097911	-0.189831
Mea1	25.2893	702.418	8.0611	1.72e-26	27.9301	877.801	10.1328	2.14e-21	0.0115	24.4109	0.0348	0.0115	27.0517	0.0309	0.006	0.1482	-0.1706	1.21e-11	0	0	5.34e-05	0.2808	2.5422	0.3114	2.1931	-0.0982659	0.159181	0	0	-0.0976205	0
Ap1s1	26.8295	1788.86	24.679	0	30	1237.68	16.5508	4.2e-25	0.0138	26.4218	0.0149	0.0134	29.2751	0.0236	-0.0411	0.1479	0.6686	7.61e-21	0	0	6.08e-05	0.3637	2.1579	0.3906	1.882	-0.0688684	0.146599	0	0	-0.0974651	0.0298507
Hes6	27.8414	920.99	18.102	0	30.5482	1513.02	29.0834	0	0.0196	27.0115	0.0294	0.0192	29.9237	0.0198	-0.0313	0.1477	-0.5708	3.16e-23	0	0	1.91e-05	0.5304	1.7496	0.5739	1.528	-0.0757972	0.145026	0	0	-0.0973209	0.0208333
Snrpd1	28.5664	831.47	19.6705	0	30.9807	2437.77	49.1359	0	0.0237	27.6066	0.0332	0.0202	30.5772	0.0126	-0.2325	0.1474	-1.4019	0	0	0	1.57e-05	0.652	1.527	0.6167	1.4422	0.0572401	0.0587991	0	0	-0.0971508	0.173267
Pet100	30.0238	1959.81	21.7749	5.56e-26	33.1713	2491.73	34.3404	0	0.0111	29.5532	0.0151	0.0138	32.718	0.0132	0.3108	0.1468	-0.1972	0	0	0	8.01e-11	0.3281	2.2266	0.4504	1.722	-0.271536	0.293031	0	0	-0.0967296	-0.195652
Pcnp	28.7572	2208.76	19.2446	3.76e-16	32.3136	1152.25	12.0604	3.49e-22	0.0087	28.3736	0.0129	0.0105	31.4071	0.0273	0.2638	0.1465	1.086	0	0	0	1.04e-06	0.2477	2.663	0.3271	2.095	-0.242739	0.271122	0	0	-0.0965864	-0.171429
Pon2	27.7033	742.928	6.7096	4.28e-16	30.0697	1750.42	16.0123	2.51e-14	0.009	26.6932	0.0359	0.0092	29.5467	0.0169	0.0178	0.1465	-1.0893	0.00144	0	0	4.39e-05	0.2406	2.7336	0.2693	2.3671	-0.106573	0.154831	0	0	-0.0965759	-0.0217391
Penk	24.9944	911.612	8.6717	9.83e-18	27.3066	1801.33	14.0792	6.83e-14	0.0095	24.3074	0.0267	0.0078	26.895	0.015	-0.2836	0.1459	-0.8325	0	0	0	1.25e-06	0.2302	2.9947	0.2111	2.8335	0.0904784	0.0568908	0	0	-0.0962112	0.217949
Cybb	24.8215	936.492	22.7744	0	28.0871	559.505	22.0653	0	0.0243	24.1618	0.0258	0.0395	26.7179	0.0478	0.6983	0.1451	0.8869	0	0	0	0	0.586	1.6947	1.0453	1.084	-0.439395	0.563376	0	0	-0.0956699	-0.38481
Dynlt1c	27.5461	258.969	3.8451	1.65e-24	28.3828	902.313	8.8872	8.83e-17	0.0148	24.8785	0.0962	0.0099	27.5032	0.0305	-0.5903	0.1447	-1.657	0	0	0	5.14e-13	0.368	2.0681	0.2705	2.3075	0.360444	-0.103749	0	0	-0.0954325	0.494949
Ndufab1	24.8453	239.687	6.6726	0	27.4378	268.167	6.4362	0	0.0279	22.5012	0.0939	0.024	24.8608	0.093	-0.2158	0.1439	-0.0146	0	0	1.47e-12	1.64e-05	0.6249	1.5528	0.5942	1.4674	0.0516661	0.0581982	0	0	-0.0949125	0.1625
2007-09-01	26.9727	605.74	20.1018	0	29.2524	1145.98	37.8277	0	0.0331	25.8034	0.0427	0.0331	28.5087	0.0249	-0.0034	0.1438	-0.7806	0.171	0	0	5.4e-08	0.8529	1.2583	0.9395	1.0768	-0.0921767	0.168555	0	0	-0.0948938	0
Tpr	28.6295	394.159	4.1736	3.48e-25	29.9574	1900.76	45.3289	0	0.0106	26.6798	0.0678	0.0238	29.4767	0.0155	1.1704	0.1438	-2.1245	0	0	0	0	0.2822	2.5402	0.7026	1.3505	-0.598349	0.880933	0	0	-0.0948851	-0.554622
Dnajc8	26.0059	897.717	27.5364	0	29.6418	477.707	10.6443	0	0.0306	25.2496	0.0284	0.0223	27.893	0.0583	-0.4528	0.1436	1.0384	0	0	0	7.54e-15	0.7707	1.3528	0.6191	1.4454	0.244872	-0.0640653	0	0	-0.0947693	0.372197
Slpi	39.4503	1593.69	133.695	0	43.558	1792.11	142.932	0	0.084	38.4746	0.0241	0.0799	42.5014	0.0237	-0.0712	0.1436	-0.0263	0	0	2.62e-15	0.000204	3.2249	0.4479	3.3898	0.3942	-0.0486459	0.136225	0	0	-0.0947451	0.0513141
Mdm2	28.6579	591.724	4.5457	3.47e-12	30.6393	2006.08	12.3087	4.27e-08	0.0077	27.3153	0.0462	0.0061	30.1648	0.0151	-0.3258	0.1432	-1.6155	0	0	0	9.89e-08	0.2093	2.9304	0.1852	2.8913	0.13013	0.0135233	0	0	-0.0944644	0.262295
Hnrnpm	27.3995	1161.65	36.1363	0	30.6672	811.909	22.0308	0	0.031	26.744	0.0233	0.0273	29.5335	0.0363	-0.1816	0.1431	0.6407	0	0	0	5.92e-06	0.827	1.2765	0.8016	1.2004	0.0316866	0.0633955	0	0	-0.0944521	0.135531
Sar1b	28.604	841.418	14.0658	0	30.8998	2472.27	39.3545	0	0.0167	27.6424	0.033	0.0159	30.4968	0.0123	-0.0665	0.1418	-1.4178	4.17e-21	0	0	0.000114	0.4602	1.8705	0.4847	1.6633	-0.0505467	0.124572	0	0	-0.0935967	0.0503145
Gapdh	41.7492	2498.13	147.739	0	45.9339	3019.36	186.653	0	0.0595	41.0288	0.0164	0.0619	45.2277	0.015	0.0575	0.1406	-0.1306	6.62e-27	0	0	0	2.4211	0.4588	2.7995	0.3224	-0.135167	0.423077	0	0	-0.0928391	-0.0387722
Glrx3	28.6024	1677.94	27.22	0	31.3291	2838.33	37.6137	1.22e-23	0.0162	28.1088	0.0168	0.0133	30.9823	0.011	-0.2898	0.1404	-0.618	0	0	0	1.35e-05	0.4548	1.9117	0.4113	1.8255	0.105762	0.0472199	0	0	-0.0927465	0.218045
Pdk3	28.7483	2854.5	20.9691	8.89e-17	32.1003	1346.32	7.7942	3.73e-07	0.0073	28.451	0.0101	0.0058	31.3398	0.0233	-0.3395	0.1395	1.2106	0	0	0	1.33e-07	0.2088	2.8946	0.1809	2.8716	0.154229	0.00800947	0	0	-0.0921767	0.258621
Cd24a	27.3281	817.838	34.9773	0	30.2244	799.203	36.6837	0	0.043	26.4265	0.0322	0.0461	29.1069	0.0364	0.0992	0.1394	0.1746	0	0	0	3.36e-14	1.1255	1.0585	1.3358	0.8676	-0.157434	0.220032	0	0	-0.0920881	-0.0672451
Mrpl44	28.5802	312.831	2.7517	1.78e-13	29.579	1154.96	9.8119	9.56e-14	0.0088	26.1692	0.0838	0.0085	28.8215	0.025	-0.0472	0.1393	-1.7479	0	0	0	3.41e-05	0.2292	2.7952	0.244	2.4417	-0.0606557	0.144776	0	0	-0.0920251	0.0352941
H2afx	24.8957	280.063	8.6003	0	25.9918	779.757	20.9983	0	0.0307	22.8317	0.0818	0.0269	25.1448	0.0323	-0.1878	0.1392	-1.3405	0	0	0	0.000872	0.6966	1.5559	0.6766	1.5331	0.0295596	0.0148718	0	0	-0.0919912	0.141264
Nop10	26.709	397.295	13.2004	0	28.5626	772.271	19.9357	0	0.0332	24.9991	0.0632	0.0258	27.5255	0.0357	-0.3609	0.1389	-0.8262	0	0	0	5.6e-11	0.8262	1.3457	0.7081	1.347	0.166784	-0.000965108	0	0	-0.091784	0.286822
Rps21	26.9304	841.201	17.5012	0	29.2207	1650.86	44.1939	0	0.0208	26.0776	0.031	0.0268	28.6997	0.0174	0.3632	0.1382	-0.834	0	0	0	6.58e-27	0.5423	1.6849	0.7678	1.2307	-0.293696	0.369058	0	0	-0.0913633	-0.223881
Snrpb2	25.1003	497.082	11.1777	0	28.1031	406.918	6.8333	0	0.0225	23.8793	0.0483	0.0168	26.2702	0.0645	-0.4162	0.1377	0.419	0	0	0	5.09e-09	0.5356	1.7289	0.4398	1.7806	0.217826	-0.0290352	0	0	-0.0910119	0.339286
Bri3bp	29.8111	274.6	1.9838	1.52e-12	30.1175	1499.51	11.5062	2.04e-15	0.0073	26.8196	0.0975	0.0077	29.5032	0.0196	0.0844	0.1376	-2.3109	8.77e-14	0	0	2.32e-05	0.1899	3.1388	0.2256	2.6618	-0.158245	0.179202	0	0	-0.0909596	-0.0519481
Pirb	29.0692	504.977	2.4997	5.94e-07	30.568	2633.6	26.7438	6.76e-26	0.005	27.4619	0.0544	0.0102	30.208	0.0115	1.0358	0.1375	-2.2441	0	0	0	1.55e-11	0.135	3.915	0.3068	2.424	-0.559974	0.615099	0	0	-0.0909064	-0.509804
Stk17b	26.3999	1826.63	13.6539	2.88e-14	31.0111	373.479	2.9428	1.72e-16	0.0075	26.0072	0.0143	0.0079	28.6068	0.0766	0.0799	0.1374	2.4186	0	0	0	1.49e-05	0.1943	3.1583	0.2245	2.7749	-0.134521	0.138167	0	0	-0.0908735	-0.0506329
Nusap1	26.5743	500.059	7.2536	0	28.4416	1122.05	10.979	7.49e-27	0.0145	25.2168	0.0504	0.0098	27.7274	0.0247	-0.5674	0.1369	-1.0295	0	0	0	1.09e-12	0.3642	2.2314	0.271	2.5026	0.343911	-0.108367	0	0	-0.0905458	0.479592
Srsf3	29.9624	529.549	23.0731	0	32.6653	679.384	27.4065	0	0.0436	28.3317	0.0535	0.0405	31.1438	0.0458	-0.1064	0.1365	-0.2256	0	0	0	0.000105	1.2283	0.9756	1.2517	0.8835	-0.0186946	0.104244	0	0	-0.0902941	0.0765432
Tgfb1	25.3691	424.42	8.0183	0	28.8159	302.593	5.5452	0	0.0189	23.9244	0.0564	0.0183	26.2862	0.0872	-0.0461	0.1358	0.6284	5.1e-22	0	0	3.67e-05	0.451	1.8977	0.4801	1.6637	-0.0606124	0.14065	0	0	-0.0898494	0.0327869
Aldh2	28.2684	1063.75	37.2329	0	31.1251	1092	46.6707	0	0.035	27.5263	0.0259	0.043	30.2378	0.0276	0.297	0.1355	0.0907	0	0	0	0	0.9624	1.1656	1.2859	0.8337	-0.251575	0.398105	0	0	-0.0896725	-0.186047
Rab10	28.0557	932.525	10.1614	4.23e-23	31.3381	668.41	6.9273	1.75e-23	0.0109	27.2262	0.0293	0.0104	29.9047	0.0448	-0.0716	0.1354	0.6143	0	0	0	8.26e-05	0.2974	2.4513	0.3071	2.1941	-0.0315858	0.117223	0	0	-0.0895679	0.0480769
Ubb	60.3013	1546.26	124.57	0	64.977	3391.83	226.646	0	0.0811	57.9962	0.0375	0.0672	63.7012	0.0188	-0.2716	0.1354	-0.9983	0	0	0	0	4.6647	0.1043	4.2422	0.1142	0.0995945	-0.08669	0	0	-0.0895588	0.206845
Ndufs7	26.6078	561.953	16.534	0	28.9257	778.583	20.34	0	0.0294	25.3797	0.0453	0.0261	27.8709	0.0359	-0.1701	0.1351	-0.3367	0	0	0	4.2e-07	0.7432	1.399	0.7263	1.2798	0.0232686	0.0931396	0	0	-0.0893836	0.126437
mt-Co2	23.5283	249.071	10.5223	0	24.7389	514.734	20.8507	0	0.0423	21.4742	0.0862	0.0405	23.5787	0.0459	-0.0644	0.1349	-0.9093	2.85e-11	0	0	0.000344	0.9027	1.303	0.9471	1.1765	-0.0468799	0.107522	0	0	-0.0892543	0.0444444
Hnrnpc	26.5842	615.349	12.1657	0	28.7792	989.055	17.5695	0	0.0198	25.4635	0.0415	0.0178	27.9564	0.0283	-0.1514	0.1347	-0.5548	0	0	0	2.88e-05	0.5023	1.7986	0.4969	1.6288	0.0108674	0.104249	0	0	-0.089171	0.11236
Snx17	29.3456	231.47	2.8178	0	29.6004	832.861	10.7621	9.47e-21	0.0122	26.0314	0.1126	0.0129	28.5703	0.0343	0.087	0.1343	-1.7156	0	0	0	3.9e-05	0.3163	2.3027	0.3695	1.9639	-0.143978	0.172514	0	0	-0.088865	-0.0542636
B3gnt8	29.0255	2175.14	10.5744	3.9e-08	31.7346	3233.1	30.6157	2.64e-18	0.0049	28.6252	0.0131	0.0095	31.4135	0.0098	0.9543	0.1341	-0.4305	0	0	0	8.85e-15	0.139	3.6941	0.2974	2.2453	-0.532616	0.645259	0	0	-0.0887612	-0.484211
Cd37	26.4014	402.279	10.8047	0	27.8171	1174.27	34.9629	0	0.027	24.7489	0.0614	0.0298	27.1475	0.0231	0.1459	0.1335	-1.4107	0	0	0	1.84e-12	0.6608	1.4953	0.8031	1.2196	-0.177188	0.226058	0	0	-0.0883544	-0.0939597
Vdac1	31.091	447.139	6.9282	0	32.5698	1525.39	23.4968	0	0.0155	29.0448	0.0649	0.0154	31.8581	0.021	-0.0157	0.1334	-1.6262	7.03e-07	0	0	4.61e-05	0.4472	1.8702	0.4871	1.6259	-0.0819134	0.150255	0	0	-0.0883072	0.00649351
Nubp2	28.8363	433.731	4.963	1.75e-26	30.8176	777.564	9.32	3.86e-20	0.0114	27.0134	0.0627	0.012	29.6282	0.0381	0.077	0.1333	-0.7173	1.33e-21	0	0	1.11e-05	0.3085	2.3587	0.3552	1.9624	-0.131475	0.201947	0	0	-0.0882538	-0.05
Tomm22	27.2361	459.694	14.8283	0	28.623	1818.01	50.2461	0	0.0322	25.6875	0.0561	0.0276	28.1724	0.0155	-0.2221	0.1332	-1.8513	0	0	0	1.01e-06	0.825	1.3079	0.7809	1.227	0.0564733	0.0659332	0	0	-0.0882033	0.166667
Eef1g	25.9084	232.65	6.2596	0	26.5185	707.807	22.3062	0	0.027	23.293	0.1001	0.0315	25.5442	0.0362	0.2222	0.1331	-1.4667	0	0	0	2.11e-13	0.6262	1.5856	0.8024	1.275	-0.219591	0.243608	0	0	-0.0881296	-0.142857
Smim7	27.2716	1217.76	16.0899	0	29.7131	1902.27	23.1114	0	0.0132	26.6673	0.022	0.0121	29.2394	0.0154	-0.1213	0.1328	-0.5128	0	0	0	9.4e-05	0.3522	2.2276	0.3546	2.0156	-0.00676819	0.10518	0	0	-0.0879669	0.0909091
S100a8	16.6431	498.479	117.671	0	18.3743	447.222	99.1869	0	0.2346	16.0733	0.0334	0.2208	17.6235	0.0398	-0.0879	0.1328	0.2569	0	0	0	4.44e-06	3.7569	0.6293	3.8711	0.6077	-0.0295007	0.0355439	0	0	-0.0879621	0.0625
Ppil1	28.6671	915.117	9.64	4.53e-21	31.2233	1257.45	12.4355	3.22e-15	0.0105	27.7691	0.0304	0.0099	30.4419	0.0242	-0.0882	0.1326	-0.3282	4.48e-16	0	0	7.61e-05	0.2894	2.4003	0.2998	2.1705	-0.0346898	0.105874	0	0	-0.0878	0.0606061
Fos	38.1414	3844.74	274.842	0	41.9011	3428.97	210.202	0	0.0718	37.7339	0.0098	0.0616	41.3648	0.012	-0.2207	0.1325	0.2977	0	7.53e-27	0	5.11e-10	2.6871	0.5003	2.5337	0.5198	0.0605439	-0.0375144	0	0	-0.0877775	0.165584
Cks1brt	27.145	321.794	3.0261	1.76e-12	27.7945	2101.55	10.4643	0.000122	0.0094	25.0128	0.078	0.005	27.4177	0.0132	-0.9197	0.1324	-2.5584	0	0	0	1.36e-17	0.2351	2.5996	0.1361	3.2108	0.727406	-0.190358	0	0	-0.0877134	0.88
1810043H04Rik	26.821	861.352	8.865	3.09e-21	29.1306	1321.58	12.7846	2.28e-16	0.0103	25.9999	0.0302	0.0097	28.4922	0.0217	-0.0893	0.1321	-0.4818	0	0	0	4.73e-05	0.2664	2.5258	0.2756	2.2887	-0.0333817	0.103596	0	0	-0.0874731	0.0618557
Tm9sf3	25.6045	463.295	12.9632	0	27.9486	540.923	15.7333	0	0.0281	24.2344	0.0522	0.0291	26.5559	0.0491	0.053	0.132	-0.0892	4.29e-13	0	0	9.36e-11	0.6715	1.4777	0.7692	1.2171	-0.127015	0.214116	0	0	-0.0874194	-0.0343643
Rtf1	25.5246	743.109	7.2572	5.1e-18	27.9481	831.004	11.1764	1.19e-23	0.0098	24.664	0.0332	0.0134	27.0234	0.0326	0.4611	0.1318	-0.0289	0	0	0.000183	4.7e-11	0.2397	2.7732	0.3629	2.0089	-0.339487	0.380457	0	0	-0.0873095	-0.268657
Pik3r1	25.5605	601.683	5.4755	1.25e-15	27.3337	1540.8	11.7969	1.21e-12	0.0091	24.5105	0.0409	0.0077	26.8502	0.0175	-0.2485	0.1315	-1.2222	0	0	0	1.66e-06	0.2225	2.929	0.2056	2.7613	0.0821984	0.0607323	0	0	-0.087139	0.181818
Spcs3	25.785	465.028	6.1386	6.56e-22	27.9328	636.203	7.9166	1.94e-20	0.0132	24.4163	0.0527	0.0124	26.7457	0.0422	-0.0849	0.1315	-0.3213	0	0	0	9.71e-05	0.3224	2.2806	0.3325	2.0456	-0.0303759	0.114881	0	0	-0.0870944	0.0645161
Gm11273	27.3916	398.207	3.8118	8.72e-15	29.2887	671.609	4.8485	3.75e-09	0.0096	25.6032	0.0644	0.0072	28.0391	0.042	-0.4111	0.1311	-0.617	0	0	0	8.95e-09	0.244	2.5678	0.2017	2.6632	0.209717	-0.0358216	0	0	-0.0868751	0.333333
Map2k2	28.9123	328.905	4.6065	0	30.1848	790.39	10.8548	0	0.014	26.5362	0.0807	0.0137	29.0577	0.0368	-0.0291	0.131	-1.1339	0.000958	0	0	0.000157	0.3685	2.1557	0.3981	1.9098	-0.0743532	0.128757	0	0	-0.0867756	0.0218978
Cldn15	26.6046	465.895	5.6194	9.84e-23	28.3806	922.559	17.0312	0	0.012	25.1379	0.0545	0.0185	27.5228	0.0299	0.6181	0.1308	-0.8687	0	0	0	9.05e-22	0.3016	2.3894	0.507	1.6527	-0.405128	0.445755	0	0	-0.0866518	-0.351351
Ppp2r3c	25.9187	1360.54	12.2153	9.7e-15	29.0772	655.707	4.802	1.48e-09	0.009	25.4149	0.0188	0.0073	27.8205	0.0427	-0.2941	0.1305	1.1825	0	0	0	1.08e-06	0.2271	2.8134	0.2029	2.6979	0.119271	0.0428111	0	0	-0.0864686	0.232877
Rpl41	45.3745	987.635	67.6719	0	48.1528	3430.39	234.634	0	0.069	43.3503	0.0438	0.0684	47.4524	0.0138	-0.0112	0.1304	-1.6632	0.0819	0	0	0	2.9664	0.3371	3.2328	0.2873	-0.0824053	0.173338	0	0	-0.0864466	0.00877193
Clec4b2	28.6211	1897.32	15.9237	3.22e-20	31.4987	1531.24	15.1496	3.08e-17	0.0084	28.1794	0.0149	0.0099	30.8418	0.0201	0.2435	0.1302	0.4316	0	0	0	4.26e-06	0.2356	2.8087	0.3042	2.2374	-0.22551	0.255341	0	0	-0.0863244	-0.151515
Ilk	26.9528	1256.82	17.1119	0	29.871	855.842	12.5131	0	0.0136	26.3623	0.0214	0.0147	28.8445	0.0337	0.1111	0.1298	0.6582	0	0	0	1.26e-05	0.3574	2.1526	0.4208	1.8246	-0.150665	0.179765	0	0	-0.0860545	-0.0748299
Ppp2r4	27.4032	1164.25	11.1949	4.17e-18	29.9882	1274.62	13.0992	7.65e-19	0.0096	26.7655	0.023	0.0103	29.2847	0.023	0.0963	0.1298	-0.0025	0	0	2.55e-08	3.37e-05	0.258	2.5755	0.3004	2.1676	-0.141145	0.18818	0	0	-0.0860244	-0.0679612
Tap2	28.9276	898.379	8.7476	9.32e-18	31.2904	1514.46	16.6587	5.94e-20	0.0097	28.0045	0.0315	0.011	30.6343	0.0202	0.1834	0.1295	-0.6407	0	0	0	5.85e-06	0.2725	2.537	0.3358	2.0695	-0.188505	0.2259	0	0	-0.085845	-0.118182
Spc25	28.4855	911.237	8.7792	1.08e-22	30.776	1634.34	12.5104	3.36e-14	0.0096	27.6091	0.0303	0.0077	30.1875	0.0185	-0.3302	0.1288	-0.7147	0	0	0	5.82e-08	0.2661	2.6071	0.231	2.6507	0.151948	-0.0164485	0	0	-0.0854128	0.246753
Usmg5	28.054	1883.62	35.4137	0	30.6315	2212.49	38.3667	0	0.0187	27.6143	0.0149	0.0174	30.1925	0.0136	-0.1023	0.1288	-0.1239	1e-24	0	0	0.000218	0.5141	1.7098	0.525	1.5599	-0.0207619	0.0960959	0	0	-0.0853921	0.0747126
Tor1a	24.6725	1867.27	63.8696	0	27.4215	901.323	26.3688	0	0.034	24.3259	0.0134	0.0292	26.596	0.0296	-0.2161	0.1287	1.1484	0	0	0	1.1e-07	0.8259	1.3224	0.7763	1.2438	0.0638928	0.0631934	0	0	-0.0853549	0.164384
Zc3h14	30.0818	1473.84	11.2811	2.91e-14	32.5995	2797.65	16.0294	2.59e-07	0.0076	29.4581	0.0202	0.0057	32.2031	0.0115	-0.4114	0.1285	-0.8112	0	0	0	3.26e-08	0.2243	2.7937	0.1849	2.8278	0.213088	-0.0120588	0	0	-0.0852402	0.333333
Pim1	28.1162	1451.64	10.2119	1.04e-13	30.9981	1076.48	11.5474	0	0.007	27.564	0.0191	0.0108	30.1154	0.0279	0.6142	0.1277	0.5505	0	0	0	1.53e-09	0.1934	3.2105	0.3221	2.2651	-0.399565	0.417377	0	0	-0.0847208	-0.351852
Tmem9b	26.327	381.568	8.3959	0	27.471	1262.06	21.8581	0	0.022	24.6096	0.0645	0.0173	26.8789	0.0214	-0.3478	0.1273	-1.5914	0	0	0	1.54e-07	0.5393	1.6852	0.4664	1.7026	0.156304	-0.0102197	0	0	-0.0844268	0.271676
Pcna	25.035	391.778	12.1059	0	27.2867	443.906	10.4646	0	0.0309	23.5119	0.0603	0.0236	25.6797	0.0578	-0.3844	0.1272	-0.0625	0	0	3.64e-12	8.17e-11	0.7256	1.4547	0.6002	1.53	0.20893	-0.0492157	0	0	-0.0844169	0.309322
Mrpl57	28.975	1276.07	32.6402	0	31.7136	1294.64	31.9758	0	0.0256	28.3199	0.0222	0.0247	30.9295	0.024	-0.0526	0.1272	0.1079	0	0	0	2.29e-06	0.7254	1.4338	0.7582	1.2624	-0.0432604	0.135773	0	0	-0.0843725	0.0364372
Rpl21	35.0133	832.469	49.4123	0	37.1767	2908.97	171.343	0	0.0594	33.5843	0.0404	0.0593	36.6784	0.0126	-0.0034	0.1271	-1.6808	3.62e-12	0	0	2.04e-08	1.9923	0.6226	2.1609	0.5234	-0.078023	0.18953	0	0	-0.0843576	0.00168634
Cfl1	41.9218	1602.87	105.116	0	45.5506	2203.64	127.211	0	0.066	40.8349	0.0255	0.0581	44.593	0.0202	-0.1836	0.127	-0.336	0	0	0	4.44e-20	2.6813	0.3713	2.562	0.3609	0.0465652	0.0288168	0	0	-0.0842756	0.135972
Ncf2	27.878	255.042	4.9347	0	27.902	1515.81	41.2293	0	0.0194	25.0916	0.0983	0.0272	27.3877	0.0182	0.4855	0.1263	-2.4345	0	0	0	0	0.481	1.8406	0.7449	1.3046	-0.354276	0.410854	0	0	-0.0838369	-0.286765
Fam101b	25.8181	643.982	8.2576	8.43e-27	27.784	1104.97	17.7589	0	0.0128	24.8104	0.0387	0.0161	27.0804	0.0246	0.3261	0.1263	-0.6568	0	0	0	6.91e-08	0.3182	2.3856	0.4325	1.8957	-0.264277	0.258427	0	0	-0.0838245	-0.204969
Pddc1	28.2908	517.249	3.6452	2.24e-11	29.9949	1207.58	9.8072	9.85e-12	0.007	26.797	0.0522	0.0081	29.2481	0.0243	0.2086	0.1263	-1.1013	0	0	0	1.75e-05	0.1875	3.1401	0.2375	2.5445	-0.210526	0.234073	0	0	-0.0838037	-0.135802
Ywhab	27.72	323.303	5.3789	0	28.4513	1301.22	24.6953	0	0.0166	25.4992	0.0793	0.019	27.8275	0.0214	0.1906	0.1261	-1.8881	0	0	0	7.37e-09	0.423	1.9756	0.5264	1.5981	-0.196429	0.236218	0	0	-0.083669	-0.126316
Snrpd2	27.2953	963.423	24.5807	0	29.5027	1590.64	42.6265	0	0.0256	26.5249	0.0275	0.0268	28.942	0.0182	0.0648	0.1258	-0.5933	2.3e-17	0	0	2.54e-08	0.6732	1.4868	0.7729	1.2473	-0.128995	0.192015	0	0	-0.0835153	-0.0447761
Hp1bp3	28.4496	743.84	5.6437	5.45e-15	30.6169	1270.1	16.6167	7.38e-27	0.0076	27.398	0.0369	0.0131	29.889	0.0235	0.7843	0.1255	-0.6471	0	0	0	7.53e-20	0.2081	2.9627	0.3908	1.902	-0.467503	0.557676	0	0	-0.0833417	-0.419847
Acd	27.5011	2213.63	17.6036	1.14e-14	30.3473	1247.82	7.2951	4.26e-10	0.0079	27.1506	0.0124	0.0058	29.6175	0.0238	-0.4426	0.1255	0.9396	0	0	0	1.81e-08	0.2171	2.9137	0.1734	2.9405	0.252018	-0.0091141	0	0	-0.083292	0.362069
Ift20	27.0655	1137.15	11.1142	1.62e-20	29.6755	1005.27	8.2013	4.43e-12	0.0098	26.4172	0.0236	0.0082	28.8161	0.0287	-0.2567	0.1254	0.2833	0	0	0	4.18e-06	0.2573	2.6775	0.2348	2.5342	0.0958262	0.0565464	0	0	-0.0832486	0.195122
Prkag1	28.3014	241.72	4.0963	0	29.0105	570.529	9.9013	0	0.0169	25.3048	0.1049	0.0174	27.5933	0.0484	0.0344	0.1249	-1.1158	8.69e-13	0	0	8.23e-05	0.4271	1.9379	0.4777	1.691	-0.105924	0.146008	0	0	-0.0829368	-0.0287356
Fcnb	21.7239	408.98	32.3967	0	23.8904	376.836	21.792	0	0.079	20.5944	0.0514	0.0579	22.448	0.0596	-0.4492	0.1243	0.2132	0	0	0	3.97e-26	1.6277	0.9972	1.2903	1.1162	0.26149	-0.106612	0	0	-0.0825731	0.364421
Pold4	25.6654	1101.72	16.1169	0	27.8202	1625.43	31.9085	0	0.0146	25.0776	0.0228	0.0196	27.331	0.0169	0.4219	0.1241	-0.4337	0	0	0	2.08e-16	0.3671	2.2237	0.5357	1.6324	-0.314728	0.362227	0	0	-0.0824485	-0.255102
Get4	26.5929	316.669	2.5101	1.52e-14	27.4779	969.402	8.5867	3.82e-13	0.0079	24.5055	0.0775	0.0088	26.7011	0.0277	0.1575	0.1238	-1.4845	0	0	0	1.97e-05	0.1931	3.065	0.2356	2.4907	-0.18039	0.230578	0	0	-0.0822288	-0.102273
Rps26-ps1	28.7631	1101.45	16.6916	0	30.8905	2584.59	40.4725	0	0.0152	28.0052	0.0254	0.0157	30.5129	0.0118	0.0418	0.1237	-1.1037	5.33e-07	0	0	1.03e-05	0.4223	1.9115	0.48	1.6291	-0.120208	0.173347	0	0	-0.0821849	-0.0318471
Ifitm3	24.1144	1039.4	28.414	0	26.0625	1730.99	33.8661	0	0.0273	23.5565	0.0228	0.0195	25.6647	0.0149	-0.483	0.1237	-0.6121	0	0	0	9.25e-13	0.643	1.7837	0.5028	1.9866	0.278839	-0.102134	0	0	-0.082144	0.4
Ddx24	25.4562	298.357	2.7205	5.38e-12	28.6468	237.144	2.6369	7.02e-19	0.0091	23.4484	0.0786	0.0111	25.5314	0.1077	0.2855	0.1228	0.454	0	0	0	3.7e-06	0.2125	2.9128	0.2828	2.3	-0.248586	0.266435	0	0	-0.0815858	-0.18018
Neat1	27.1962	317.365	4.3572	0	27.8762	1241.25	19.1096	0	0.0138	25.0282	0.0787	0.0154	27.246	0.022	0.1556	0.1225	-1.8382	0	0	0	1.15e-05	0.3421	2.2515	0.4181	1.8945	-0.181775	0.18844	0	0	-0.0813991	-0.103896
Ube2c	24.2665	797.758	14.6942	0	26.5274	768.439	11.4201	0	0.0184	23.5403	0.0297	0.0148	25.6252	0.0335	-0.3105	0.1224	0.1716	0	0	0	1.33e-08	0.4335	2.2287	0.3805	2.3595	0.13929	-0.0554355	0	0	-0.0813613	0.243243
Eef2	29.6876	1864.76	69.5003	0	32.3167	2020.34	90.7788	0	0.0372	29.1979	0.0158	0.0449	31.7826	0.0157	0.2742	0.1224	-0.0008	0	0	1.62e-08	0	1.0806	1.0699	1.4219	0.8062	-0.240031	0.32709	0	0	-0.0813244	-0.171492
Yif1a	29.0069	1370.92	9.8003	2.36e-14	31.4925	1655.58	11.9641	3.65e-12	0.0071	28.373	0.0207	0.0072	30.8773	0.0187	0.0161	0.122	-0.1501	0.000155	0	0	1.9e-05	0.2003	3.0106	0.2218	2.6455	-0.0969342	0.138008	0	0	-0.0811049	-0.0138889
Cyb5r3	28.5107	758.853	6.9726	1.16e-15	30.4684	1648.68	14.867	3.55e-16	0.0092	27.4684	0.0362	0.009	29.8922	0.0181	-0.0268	0.122	-0.9966	2.45e-17	0	0	3.94e-05	0.252	2.6913	0.2684	2.3266	-0.0611028	0.156752	0	0	-0.0810847	0.0222222
Fbxl14	28.099	385.915	3.0611	2.68e-11	30.0768	548.672	3.3464	1.57e-07	0.0079	26.1778	0.0678	0.0061	28.4821	0.0518	-0.3743	0.1217	-0.3893	0	0	0	2.1e-08	0.2066	2.9494	0.1715	2.9789	0.204665	-0.00990298	0	0	-0.0809034	0.295082
Rps27	45.0439	2209.67	129.751	0	48.8329	2870.38	167.843	0	0.0587	44.1099	0.02	0.0588	47.9897	0.0167	0.0009	0.1216	-0.2594	0.0183	0	0	1.25e-21	2.58	0.4156	2.8097	0.321	-0.0817525	0.294704	0	0	-0.0808465	-0.00170068
Arhgap9	27.8465	2092.62	31.5045	0	31.0024	832.497	14.058	0	0.0151	27.4671	0.0131	0.0169	29.8793	0.0359	0.1669	0.1214	1.4507	0	0	0	2.52e-08	0.4145	2.0359	0.5048	1.652	-0.178883	0.232385	0	0	-0.0807315	-0.106509
Yipf4	24.0663	951.42	16.7785	0	26.6579	607.452	11.1774	0	0.0177	23.4687	0.0249	0.0184	25.5188	0.0422	0.0575	0.1208	0.7624	0	0	0	3.01e-06	0.4151	2.0045	0.4689	1.6894	-0.114737	0.186516	0	0	-0.0803368	-0.0380435
Gm9493	32.8693	555.578	30.5548	0	35.0282	913.176	46.5188	0	0.0553	31.0082	0.0557	0.051	33.7142	0.0369	-0.1156	0.1207	-0.5945	0	0	0	0.0034	1.7011	0.7101	1.7156	0.6552	-0.00845185	0.0837912	0	0	-0.0802629	0.0843137
Mplkip	29.0496	1271.02	10.3103	1.1e-15	31.5895	1369.95	13.1161	2.77e-20	0.0081	28.3815	0.0224	0.0096	30.8572	0.0226	0.2407	0.1207	0.0118	0	0	5.11e-06	9.13e-06	0.2291	2.7955	0.294	2.2549	-0.220748	0.239745	0	0	-0.0802309	-0.15625
Pfdn5	32.8515	1382.49	64.8253	0	35.2625	3241.22	141.824	0	0.047	32.0755	0.0232	0.0439	34.8677	0.0108	-0.0992	0.1204	-1.1073	0	0	0	6.1e-10	1.5022	0.8202	1.5328	0.7056	-0.0199635	0.162415	0	0	-0.0800798	0.070615
Faap20	28.8672	914.432	8.1417	1.63e-19	30.8197	2266.45	20.4126	1.71e-18	0.0089	27.9576	0.0306	0.009	30.3862	0.0134	0.0173	0.1202	-1.1908	0.00771	0	0	4.85e-05	0.2469	2.7114	0.2734	2.3474	-0.0969276	0.155065	0	0	-0.0799244	-0.0111111
Skp1a	26.9164	499.04	8.2983	0	30.4673	313.503	5.5415	0	0.0166	25.5295	0.0512	0.0177	27.7427	0.0884	0.0903	0.1199	0.7874	0	0	0	1.89e-06	0.4247	1.9583	0.4887	1.64	-0.13096	0.194085	0	0	-0.0797759	-0.0621469
Ndufa9	27.5976	1455.33	18.1629	0	30.7045	707.123	9.464	2.37e-27	0.0125	27.0637	0.0186	0.0135	29.4089	0.0415	0.1112	0.1199	1.1563	0	0	0	9.33e-06	0.3368	2.238	0.3933	1.8677	-0.143656	0.198265	0	0	-0.0797446	-0.0740741
Trappc4	25.4872	310.013	6.1132	0	26.5239	719.879	15.5021	0	0.0197	23.5349	0.076	0.0215	25.57	0.0358	0.1271	0.1197	-1.0889	0	0	0	2.65e-07	0.4632	1.8662	0.55	1.5613	-0.157818	0.195286	0	0	-0.0795894	-0.0837209
Qdpr	28.5139	633.03	4.8943	1.19e-15	30.3684	1228.71	7.8216	5.42e-08	0.0077	27.2597	0.0431	0.0064	29.614	0.0241	-0.2799	0.1195	-0.8378	0	0	0	1.29e-06	0.2093	2.9535	0.1876	2.7814	0.115672	0.0618753	0	0	-0.0794996	0.203125
Rpl5	29.9471	1270.28	50.1449	0	32.2068	2382.6	97.5582	0	0.0395	29.2395	0.023	0.041	31.7589	0.0133	0.0521	0.1192	-0.7869	4.97e-20	0	0	2.14e-09	1.1526	1.0565	1.3005	0.884	-0.113725	0.195136	0	0	-0.0793289	-0.0365854
Ttc5	26.0506	460.879	3.5036	7.53e-10	28.8271	376.479	3.3152	4.12e-13	0.0076	24.637	0.0536	0.0088	26.7571	0.0711	0.2174	0.1191	0.4061	0	0	0	1.14e-05	0.1863	3.1134	0.2349	2.4801	-0.206897	0.255353	0	0	-0.079235	-0.136364
Xbp1	27.1723	489.71	9.1738	0	28.6218	1179.72	26.1705	0	0.0187	25.7236	0.0525	0.0222	27.9357	0.0237	0.2438	0.119	-1.1494	0	0	0	5.06e-12	0.4807	1.8434	0.6205	1.4678	-0.225302	0.255893	0	0	-0.0791854	-0.157658
Ndufb11	27.7392	828.565	31.2009	0	29.6233	1828.01	65.2732	0	0.0377	26.8352	0.0324	0.0357	29.1411	0.016	-0.0787	0.1189	-1.0164	0	0	0	3.04e-07	1.0112	1.1319	1.0428	0.9974	-0.030303	0.134851	0	0	-0.0791288	0.0560224
Efhd2	29.4038	912.466	17.7587	0	31.7989	1065.44	26.1745	0	0.0195	28.4682	0.0312	0.0246	30.8613	0.0289	0.3367	0.1164	-0.107	0	0	0	1.15e-23	0.5524	1.6766	0.7587	1.253	-0.271912	0.338069	0	0	-0.0775437	-0.207317
Dpf2	28.4109	341.073	2.7921	3.65e-14	28.7761	2285.13	15.2209	6.11e-08	0.0082	26.2177	0.077	0.0066	28.3968	0.0125	-0.3012	0.1152	-2.6248	0	0	0	3.36e-07	0.2143	2.8872	0.1883	2.8115	0.138078	0.0269251	0	0	-0.0767375	0.242424
Smc1a	28.0751	2459.55	11.2424	0.000125	30.9598	1046.88	9.7187	3.77e-15	0.0046	27.7496	0.0113	0.0093	30.055	0.0287	1.0251	0.1151	1.3444	0	0	0	6.66e-14	0.1269	3.71	0.2792	2.2796	-0.545487	0.627479	0	0	-0.076706	-0.505376
Clec2i	27.2956	1767.49	13.6049	3.64e-17	29.9907	970.334	9.5513	1.01e-17	0.0077	26.8563	0.0153	0.0098	29.0832	0.03	0.36	0.1149	0.9735	0	0	0	3.52e-06	0.2044	3.1709	0.2861	2.4636	-0.285564	0.2871	0	0	-0.07657	-0.214286
Rps3a1	46.2774	3766.9	239.776	0	50.3038	3081.69	189.08	0	0.0644	45.668	0.0121	0.0617	49.4533	0.016	-0.0614	0.1149	0.4078	3.13e-10	3.77e-21	0	3.13e-08	2.8891	0.3874	3.0197	0.3437	-0.0432493	0.127146	0	0	-0.0765429	0.0437601
0610010K14Rik	29.3036	1589.69	13.8869	4.23e-18	31.7185	1756.96	13.4555	4.68e-12	0.0087	28.7583	0.0182	0.0077	31.1391	0.0177	-0.1855	0.1147	-0.0357	0	0	6.72e-12	3.93e-06	0.2512	2.5666	0.2385	2.4636	0.0532495	0.0418087	0	0	-0.0764569	0.12987
Mrpl46	26.8462	1433.48	12.3138	1.72e-15	29.4985	873.088	6.1543	2.11e-10	0.0086	26.3369	0.0184	0.0071	28.5166	0.0327	-0.2877	0.1147	0.8311	0	0	0	2.69e-07	0.2261	2.8008	0.2	2.7596	0.1305	0.0149297	0	0	-0.0764362	0.211268
Chtop	26.192	682.384	6.2014	5.43e-14	27.8722	1388.01	12.2745	1.31e-09	0.0091	25.2169	0.0371	0.0088	27.3039	0.0197	-0.0404	0.1147	-0.9116	2.08e-27	0	0	3.27e-05	0.2282	2.762	0.2404	2.45	-0.0507488	0.127347	0	0	-0.076436	0.0340909
Fdps	28.7124	1053.1	27.2068	0	30.8195	1714.58	42.673	0	0.0259	27.9392	0.0265	0.0249	30.2508	0.0177	-0.0577	0.1147	-0.5849	9.65e-11	0	0	0.000294	0.7208	1.4113	0.7508	1.2879	-0.0399574	0.0958149	0	0	-0.0764145	0.0401606
H2afz	35.8775	1541.13	129.98	0	40.0194	733.087	56.7378	0	0.0848	35.0435	0.0227	0.078	37.9162	0.0516	-0.1193	0.1137	1.1832	0	0	0	0.00066	2.9565	0.4597	2.9262	0.436	0.0103547	0.0543578	0	0	-0.0757644	0.0871795
Timm22	27.943	620.151	4.5238	2.73e-13	29.8517	929.46	6.1816	7.98e-09	0.0073	26.7203	0.0431	0.0067	28.9064	0.0311	-0.1339	0.1135	-0.4696	0	0	0	1.71e-06	0.1934	3.0092	0.1918	2.8309	0.00834202	0.0629835	0	0	-0.0756269	0.0895522
Vps26a	28.5978	171.005	1.6685	6.13e-17	26.999	1430.53	16.8398	1.22e-21	0.0098	24.4823	0.1431	0.0118	26.4846	0.0186	0.2634	0.1134	-2.947	0	0	0	7.02e-06	0.2384	2.6861	0.3102	2.1897	-0.231464	0.226698	0	0	-0.0756024	-0.169492
Gm2000	30.08	2424.15	81.1573	0	32.6133	2221.34	72.5226	0	0.0334	29.6889	0.0123	0.0326	32.1168	0.0145	-0.0343	0.1134	0.2347	8.6e-09	0	0	9.15e-06	0.9887	1.1113	1.0435	0.9837	-0.0525156	0.129714	0	0	-0.0755959	0.0245399
Eif4g2	29.9874	1451.89	36.9771	0	32.1307	2927.5	80.2871	0	0.0257	29.3586	0.0202	0.0274	31.759	0.0109	0.0935	0.1134	-0.8906	0	9.55e-22	0	1.35e-11	0.7447	1.3709	0.8672	1.1234	-0.141259	0.220313	0	0	-0.0755817	-0.0620438
Sec61g	28.7466	708.384	25.7196	0	30.3936	1744.8	66.9293	0	0.0362	27.6081	0.0392	0.0383	29.865	0.0172	0.0803	0.1134	-1.187	0	0	0	9.39e-12	0.9996	1.1142	1.1466	0.9125	-0.128205	0.221041	0	0	-0.0755701	-0.0548303
Pop7	27.2773	809.402	5.6195	8.74e-10	29.1218	1423.71	11.4245	8.26e-13	0.0069	26.3737	0.0327	0.008	28.5251	0.02	0.2108	0.1131	-0.7064	0	0	0	1.74e-05	0.1823	3.1726	0.2285	2.574	-0.202188	0.232556	0	0	-0.0754213	-0.1375
Nsun2	30.8847	1273.41	8.8492	6.88e-11	33.1818	1894.5	12.9911	4.38e-10	0.007	30.1376	0.0237	0.0069	32.5903	0.0172	-0.0175	0.1129	-0.4606	0.0589	0	0	2.83e-05	0.2082	2.873	0.2233	2.5173	-0.067622	0.141302	0	0	-0.0752586	0.0144928
2310039H08Rik	27.4983	621.846	5.4573	4.4e-15	29.4845	820.594	6.8541	7.69e-12	0.0088	26.3155	0.0425	0.0084	28.4515	0.0347	-0.0688	0.1126	-0.2935	2.37e-26	0	0	2.15e-05	0.2304	2.7989	0.2373	2.5258	-0.0290771	0.108124	0	0	-0.0750751	0.047619
Polr2f	26.3064	1622.45	19.6048	3.98e-24	28.8384	966.906	13.2385	2.31e-26	0.0121	25.8815	0.016	0.0137	27.9807	0.0289	0.1827	0.1125	0.8552	0	0	0	4.21e-06	0.3138	2.3243	0.3808	1.9148	-0.175945	0.21386	0	0	-0.0750231	-0.116788
Smim14	30.7691	1650.64	103.482	0	33.3686	1488.97	96.1469	0	0.0632	30.1788	0.0182	0.0647	32.6208	0.0219	0.0337	0.1123	0.2667	0	1.41e-18	0	1.63e-13	1.8683	0.6555	2.1084	0.5152	-0.113878	0.272321	0	0	-0.0748602	-0.0231839
Cnih1	26.8931	804.674	7.6336	2.32e-17	28.9673	961.721	7.9879	1.9e-11	0.0095	26.0104	0.0323	0.0083	28.104	0.0293	-0.195	0.1117	-0.1429	0	0	0	3.64e-06	0.2463	2.6109	0.2328	2.5144	0.0579897	0.0383789	0	0	-0.0744947	0.144578
Fam174a	28.3745	428.057	3.6339	6.53e-16	29.3376	1431.35	19.1805	2.47e-26	0.0085	26.5916	0.0621	0.0134	28.7297	0.0201	0.6592	0.1116	-1.63	0	0	0	5.96e-14	0.2248	2.8902	0.3841	1.9959	-0.414736	0.448069	0	0	-0.0744212	-0.365672
2015-09-01	30.7564	1783.98	76.5511	0	33.1898	2025.44	73.3234	0	0.0429	30.222	0.017	0.0362	32.6321	0.0161	-0.2447	0.1107	-0.0738	0	0	1.43e-24	4.68e-17	1.2977	0.9039	1.1771	0.8872	0.102455	0.0188233	0	0	-0.0738567	0.185083
Ube2v2	28.7232	1023.18	7.4991	4.28e-11	31.6489	633.8	4.6737	1.37e-11	0.0073	27.9216	0.0273	0.0074	30.1318	0.0476	0.0059	0.1099	0.8027	0.121	0	0	2.54e-05	0.2044	2.9202	0.2212	2.5662	-0.0759494	0.137947	0	0	-0.0733511	-0.0135135
Uqcc2	30.2395	384.588	5.2886	0	30.7285	1951.11	30.555	0	0.0138	28.0095	0.0727	0.0156	30.225	0.0156	0.1789	0.1098	-2.2212	0	0	0	1.68e-07	0.3832	2.0451	0.4707	1.6778	-0.185893	0.218918	0	0	-0.0733002	-0.115385
Dctn6	29.6198	497.28	5.0516	5.01e-21	30.5753	2194.68	16.4477	3e-10	0.0102	27.9422	0.0562	0.0075	30.1459	0.0137	-0.4417	0.1095	-2.0325	0	0	0	6.95e-09	0.2835	2.5108	0.2264	2.5927	0.252208	-0.0315887	0	0	-0.0731012	0.36
Tmem128	27.4467	3069.29	25.1511	2.81e-16	30.0016	1346.5	12.3196	8.53e-16	0.0082	27.1921	0.0089	0.0092	29.3347	0.0218	0.1651	0.1094	1.2892	0	0	0	1.25e-05	0.2223	2.8902	0.2692	2.3343	-0.17422	0.238144	0	0	-0.0730398	-0.108696
Ndufa11	27.2948	508.855	14.2333	0	28.7336	1014.17	30.2925	0	0.028	25.8941	0.051	0.0299	27.9334	0.0276	0.0946	0.1094	-0.8874	0	0	0	2.49e-10	0.724	1.4045	0.8339	1.1657	-0.13179	0.204855	0	0	-0.0730058	-0.0635452
Tyrobp	47.1847	1760.67	118.25	0	50.5258	2665.94	186.045	0	0.0674	45.923	0.0261	0.0705	49.5368	0.0185	0.0655	0.1093	-0.4924	2.09e-10	1.6e-26	0	0	3.0828	0.3133	3.4429	0.2014	-0.104592	0.555611	0	0	-0.0729518	-0.0439716
Serf2	39.9961	1394.95	86.7292	0	42.3919	3715.82	203.771	0	0.0623	38.8331	0.0278	0.0549	41.8863	0.0113	-0.1804	0.1092	-1.3042	0	1.13e-25	0	2.89e-15	2.388	0.4452	2.2951	0.4212	0.0404775	0.0569801	0	0	-0.0728926	0.134791
Vsir	27.1403	1030.27	18.4222	0	29.5225	838.434	20.9441	0	0.0179	26.4309	0.0258	0.025	28.4966	0.034	0.4872	0.1086	0.3986	0	0	0	8.55e-25	0.4713	1.8765	0.7068	1.3692	-0.333192	0.370508	0	0	-0.0724893	-0.284
Vav1	29.1285	776.595	4.9077	6.07e-10	30.9267	1395.52	11.4408	1.16e-13	0.0063	28.0541	0.0361	0.0082	30.2338	0.0216	0.3775	0.108	-0.7379	0	0	0	5.2e-06	0.1763	3.1778	0.246	2.4737	-0.283333	0.284634	0	0	-0.0720948	-0.231707
Atad1	28.2856	1134.89	7.5827	1.34e-09	30.5889	1074.55	6.9665	2.64e-07	0.0067	27.582	0.0243	0.0065	29.724	0.0277	-0.0405	0.1079	0.1852	1.82e-11	0	0	9.27e-06	0.1838	3.0891	0.192	2.7493	-0.0427083	0.123595	0	0	-0.072063	0.0307692
Aars	28.7832	914.829	9.8074	6.09e-23	30.4481	2413.11	20.8189	3.36e-14	0.0107	27.8944	0.0305	0.0086	30.052	0.0124	-0.3134	0.1075	-1.2932	0	0	0	8.89e-07	0.2993	2.3684	0.26	2.3255	0.151154	0.0184476	0	0	-0.0717956	0.244186
Pno1	31.2308	637.236	4.2032	5.01e-15	32.9382	1232.92	6.5234	1.43e-06	0.0066	29.7519	0.0467	0.0053	32.0497	0.026	-0.3178	0.1073	-0.8464	0	1.13e-21	0	9.34e-08	0.1956	3.0017	0.168	2.9577	0.164286	0.0148764	0	0	-0.0716949	0.245283
Mlec	29.3774	2457.2	15.0418	9.9e-08	32.1256	1160.48	8.2399	4.13e-10	0.0061	29.0064	0.0119	0.0071	31.2398	0.0269	0.2241	0.107	1.177	0	0	0	2.1e-05	0.1764	3.1179	0.2217	2.5554	-0.20433	0.220122	0	0	-0.0714921	-0.140845
Plscr3	29.2838	420.148	2.7576	3.57e-10	30.8303	665.762	4.5132	9.98e-10	0.0066	27.3487	0.0653	0.0068	29.4473	0.0442	0.0531	0.1067	-0.5635	2.07e-09	0	0	1.79e-05	0.1789	3.1463	0.1991	2.6747	-0.101457	0.176319	0	0	-0.0712663	-0.0294118
Mmadhc	28.5249	339.507	3.1385	2.06e-14	29.7328	611.3	5.0102	6.88e-14	0.0093	26.2934	0.0773	0.0082	28.3091	0.0465	-0.1862	0.1066	-0.7319	0	4.62e-25	0	4.07e-06	0.2413	2.6845	0.2298	2.5464	0.0500435	0.0542334	0	0	-0.0712033	0.134146
Cyp4f18	24.8683	2016.13	24.6539	0	27.6248	614.4	10.902	0	0.0122	24.5574	0.0122	0.0178	26.4233	0.043	0.54	0.1057	1.8142	0	0	0	4.7e-09	0.3007	2.6697	0.4683	2.0419	-0.35789	0.307459	0	0	-0.0706157	-0.314607
H3f3b	60.0406	3277.15	245.703	0	63.9424	8252.02	496.618	0	0.0752	58.9256	0.018	0.0603	63.3945	0.0077	-0.3186	0.1055	-1.2259	0	1.34e-25	0	0	4.407	0.1375	3.786	0.184	0.164025	-0.252717	0	0	-0.0704935	0.247098
Prtn3	31.6041	1361.66	107.035	0	34.096	1282.49	98.0674	0	0.0787	30.8639	0.0227	0.0765	33.1985	0.0259	-0.041	0.1052	0.1912	2.13e-13	0	0	8.23e-05	2.418	0.6279	2.5387	0.6004	-0.047544	0.0458028	0	0	-0.0703225	0.0287582
Cbfb	27.6919	287.13	5.2964	0	28.0604	829.615	14.4602	0	0.0185	25.2195	0.0879	0.0174	27.1269	0.0327	-0.0818	0.1052	-1.4249	0	0	0	0.000227	0.4616	1.8462	0.4724	1.6856	-0.022862	0.0952776	0	0	-0.070314	0.0632184
Pcgf5	27.7532	522.744	4.6158	1.36e-14	30.1448	472.145	3.7951	2.46e-10	0.0089	26.3398	0.0504	0.008	28.3159	0.0601	-0.1405	0.1044	0.254	0	0	0	5.88e-06	0.2326	2.7343	0.2264	2.5781	0.0273852	0.0605873	0	0	-0.0697876	0.1125
Sf1	26.5371	2048.35	21.6611	9.75e-19	28.7342	1383.49	10.7038	4.02e-13	0.0106	26.1841	0.0129	0.0077	28.1339	0.0203	-0.4468	0.1036	0.6605	0	0	0	4.33e-09	0.276	2.5046	0.2174	2.6094	0.269549	-0.0401625	0	0	-0.0693043	0.376623
Zfp622	28.484	1138.93	9.9694	3e-19	30.2138	2565.78	20.0979	1.83e-12	0.0088	27.7813	0.0244	0.0078	29.8447	0.0116	-0.1599	0.1034	-1.068	0	0	0	3.52e-06	0.2435	2.736	0.2332	2.6037	0.0441681	0.0508123	0	0	-0.0691379	0.128205
Reep5	28.0542	972.509	39.3243	0	30.4096	786.644	29.2359	0	0.0404	27.244	0.0281	0.0372	29.2653	0.0372	-0.1189	0.1032	0.4057	0	0	0	7.29e-07	1.0951	1.0684	1.0871	0.9639	0.00735903	0.108414	0	0	-0.0690681	0.0860215
Rbm17	27.4068	436.708	8.0738	0	28.2436	1400.04	21.4254	5.31e-26	0.0185	25.7726	0.0591	0.0153	27.6746	0.0198	-0.2729	0.1027	-1.5774	0	0	0	3.29e-06	0.475	1.8337	0.4239	1.8011	0.120547	0.0181	0	0	-0.0687273	0.20915
Nudc	27.8468	418.689	11.3207	0	28.5032	1691.87	36.6068	0	0.0271	26.0921	0.0624	0.0217	28.0143	0.0166	-0.3207	0.1025	-1.9144	0	0	0	4.81e-09	0.705	1.443	0.6058	1.4538	0.16375	-0.00742881	0	0	-0.068615	0.248848
Chst13	26.9841	592.295	7.7816	0	28.7287	776.808	11.1686	0	0.0131	25.7963	0.0436	0.0144	27.6927	0.0357	0.1323	0.1023	-0.2892	0	0	0	6.89e-06	0.3381	2.2815	0.3988	1.8959	-0.152207	0.203386	0	0	-0.0684801	-0.0902778
Gmfg	37.2107	2654.01	159.687	0	39.9428	2811.92	170.451	0	0.0602	36.6694	0.0138	0.0611	39.3622	0.014	0.021	0.1022	0.0155	7.89e-14	4.02e-26	3.23e-26	8.27e-11	2.2024	0.5499	2.3877	0.4123	-0.0776061	0.333738	0	0	-0.0684108	-0.01473
Nudt16l1	26.6449	538.808	4.3653	9.8e-10	27.8305	1311.19	11.3867	1.63e-11	0.0081	25.3789	0.0471	0.0087	27.2378	0.0208	0.0966	0.102	-1.1798	0	0	0	3.23e-05	0.2054	2.9442	0.2358	2.5103	-0.128923	0.172848	0	0	-0.0682471	-0.0689655
Hspa2	26.6212	712.917	9.703	0	28.0818	1346.81	21.1508	0	0.0136	25.624	0.0361	0.0157	27.4998	0.0204	0.2087	0.1019	-0.8208	0	0	0	4.57e-06	0.3434	2.3586	0.4321	1.9662	-0.205277	0.199573	0	0	-0.0682114	-0.133758
Mpc2	22.9007	1153.39	39.4885	0	25.6339	401.823	13.5199	0	0.0342	22.4461	0.0196	0.0336	24.0765	0.0601	-0.0242	0.1012	1.6153	5.91e-27	0	0	3.69e-05	0.7688	1.4098	0.8075	1.2599	-0.0479257	0.118978	0	0	-0.0677175	0.0178571
Vimp	29.2862	1234.19	12.8645	8.25e-25	31.3437	1429.9	16.324	3.88e-24	0.0104	28.5799	0.0232	0.0115	30.6523	0.0214	0.14	0.101	-0.1184	1.97e-26	1.52e-24	0	2.88e-05	0.2952	2.4469	0.3485	2.0619	-0.152941	0.186721	0	0	-0.0676099	-0.0956522
Tuba1c	28.1535	1911.84	23.1897	8.85e-27	30.0993	2651.25	37.9324	0	0.0121	27.7323	0.0146	0.0143	29.7422	0.0113	0.2365	0.1009	-0.3701	0	0	0	2.73e-06	0.3372	2.2088	0.4254	1.828	-0.207334	0.208315	0	0	-0.0675774	-0.153846
Ndufv3	27.5262	2215.71	57.9405	0	30.096	946.016	27.0058	0	0.0261	27.1766	0.0123	0.0285	29.1452	0.0309	0.1261	0.1009	1.3301	0	0	0	5.07e-11	0.7094	1.4271	0.8278	1.1756	-0.14303	0.213933	0	0	-0.0675446	-0.0842105
Arpc2	49.8483	2439	162.545	0	53.0345	4329.75	264.78	0	0.0671	48.8239	0.02	0.0615	52.351	0.0121	-0.1251	0.1006	-0.7285	0	0	0	5.94e-12	3.2552	0.2349	3.1961	0.2095	0.0184913	0.121241	0	0	-0.0673741	0.0910569
Cox7b	27.3057	1202.31	25.5115	0	29.0715	1866.82	42.174	0	0.0212	26.6815	0.0224	0.0226	28.6073	0.0153	0.0932	0.1005	-0.5443	4.17e-26	0	0	3.85e-07	0.5656	1.6461	0.643	1.4024	-0.120373	0.173774	0	0	-0.0673185	-0.0619469
Prmt1	26.7458	916.223	33.1613	0	28.4581	1302.05	35.3963	0	0.0361	25.9654	0.0285	0.0272	27.8386	0.0214	-0.4114	0.1005	-0.409	0	0	0	3.88e-18	0.9354	1.2114	0.7584	1.2763	0.233386	-0.0508501	0	0	-0.0672879	0.327206
Cap1	26.9254	484.491	5.656	5.66e-22	28.2874	818.694	13.836	0	0.0117	25.4887	0.0528	0.0169	27.3258	0.0336	0.5335	0.1004	-0.6511	0	0	0	5.8e-16	0.2964	2.4064	0.4613	1.7341	-0.357468	0.387694	0	0	-0.0672295	-0.307692
Ftl1	56.6513	8200.59	651.679	0	61.0454	5085.22	362.477	0	0.0795	56.214	0.0069	0.072	60.2597	0.0118	-0.1431	0.1003	0.7819	0	8.83e-15	0	6e-20	4.4368	0.1691	4.2625	0.1763	0.0408915	-0.0408395	0	0	-0.0671377	0.104167
Lin7c	29.9572	2557.58	20.3139	6.07e-14	32.033	3366.24	16.9476	2.05e-07	0.0079	29.5926	0.0116	0.005	31.722	0.0094	-0.6561	0.1002	-0.2975	0	0	0	2.25e-12	0.2334	2.7642	0.1604	3.1129	0.455112	-0.112018	0	0	-0.0671269	0.58
Rps3	44.348	2301.37	156.485	0	47.826	1812.96	123.092	0	0.0686	43.4721	0.0188	0.0679	46.5577	0.0257	-0.0131	0.0989	0.4491	4.8e-10	1.24e-17	0	3.52e-19	2.9402	0.3573	3.1418	0.2892	-0.064167	0.235477	0	0	-0.0662748	0.0103093
Pex16	29.2993	1092.81	7.8976	5.2e-14	31.1006	1753.15	10.3768	2.56e-06	0.0072	28.5169	0.0263	0.0059	30.5392	0.0174	-0.2833	0.0988	-0.5936	0	0	0	1.5e-07	0.2058	2.9656	0.1806	2.9453	0.139535	0.00689234	0	0	-0.0662198	0.220339
Rgcc	24.7866	574.158	21.9923	0	25.9303	1348.2	45.418	0	0.0383	23.7443	0.0415	0.0336	25.4271	0.0189	-0.1851	0.0988	-1.1327	0	0	0	3.81e-05	0.9059	1.2798	0.8541	1.2313	0.0606486	0.0393893	0	0	-0.0661814	0.139881
Commd8	27.735	2088.45	23.6271	1.62e-22	30.263	924.435	10.4535	2.19e-21	0.0113	27.3545	0.0133	0.0113	29.2915	0.0317	0.0058	0.0987	1.2516	0.0477	0	0	8.13e-05	0.3086	2.4051	0.3313	2.1196	-0.068518	0.134695	0	0	-0.0661284	0
Slc50a1	29.0317	623.205	5.7882	1.12e-24	30.2433	1606	14.7737	1.74e-16	0.0093	27.7177	0.0446	0.0092	29.6743	0.0185	-0.0106	0.0984	-1.2716	1.34e-07	0	0	4.29e-05	0.2566	2.6784	0.273	2.3667	-0.0600733	0.131702	0	0	-0.0659358	0.0108696
Psmb8	27.8063	192.51	10.1006	0	26.399	1628.65	70.7385	0	0.0525	24.2619	0.1262	0.0435	25.9707	0.0159	-0.2712	0.0982	-2.9846	0	0	0	2.06e-12	1.2669	0.9942	1.1302	1.0056	0.120952	-0.0113365	0	0	-0.0657972	0.206897
Tob1	28.2924	545.787	4.1506	4.41e-15	30.2234	618.587	5.3327	6.82e-23	0.0076	26.8872	0.0492	0.0086	28.7746	0.0468	0.1751	0.0979	-0.073	0	0	0	2.55e-05	0.2043	3.0518	0.2459	2.6158	-0.169174	0.166679	0	0	-0.0655926	-0.116279
Ssr2	26.1406	196.025	5.0861	0	26.4262	368.687	8.883	0	0.026	23.0496	0.1175	0.0241	24.6441	0.0669	-0.1083	0.0965	-0.8134	0	0	0	0.000141	0.5964	1.6241	0.5924	1.4959	0.00675219	0.0857009	0	0	-0.0647011	0.0788382
Rhog	28.348	1340.98	17.2566	0	30.5679	1015.79	17.7431	0	0.0129	27.7441	0.0207	0.0175	29.6632	0.0292	0.4436	0.0965	0.4935	0	0	0	1.12e-14	0.3551	2.2132	0.5182	1.6566	-0.314743	0.335989	0	0	-0.0646963	-0.262857
Zmat2	28.5824	581.968	5.1714	1.39e-18	29.5468	2039.36	18.3319	3.56e-17	0.0089	27.2312	0.0468	0.009	29.1085	0.0143	0.0155	0.0962	-1.7118	0.0014	0	0	4.65e-05	0.2418	2.6961	0.2611	2.4039	-0.073918	0.121552	0	0	-0.0644932	-0.0111111
Rpp21	25.4733	944.817	14.2074	0	26.9915	1452.96	22.9662	0	0.0151	24.7826	0.0262	0.0158	26.4866	0.0185	0.0671	0.0959	-0.5068	0	0	0	1.69e-05	0.3711	2.1302	0.4183	1.8161	-0.112838	0.172953	0	0	-0.0643344	-0.0443038
Mzt1	26.2072	1174.31	14.6673	4.62e-20	28.9236	522.591	4.9577	1.15e-14	0.0125	25.624	0.0219	0.0095	27.3821	0.0525	-0.3986	0.0957	1.2653	0	0	0	1.27e-08	0.3198	2.302	0.2587	2.3623	0.236181	-0.025526	0	0	-0.0642062	0.315789
Gusb	29.0402	635.262	10.447	0	30.0041	2516.13	46.5559	0	0.0164	27.7374	0.0438	0.0185	29.6386	0.0118	0.1721	0.0956	-1.8935	0	0	0	5.94e-09	0.453	1.9032	0.5486	1.5422	-0.174262	0.234081	0	0	-0.0641461	-0.113514
Ralb	29.9865	586	3.885	4.49e-13	30.7955	2730.42	31.3496	1.54e-21	0.0066	28.4923	0.0489	0.0115	30.4411	0.0112	0.7975	0.0954	-2.1323	0	0	0	1.68e-15	0.1874	3.0744	0.3504	2.0272	-0.465183	0.516575	0	0	-0.0640187	-0.426087
Snrpf	26.5658	867.782	29.0456	0	28.8299	600.354	17.6249	0	0.0334	25.7604	0.0298	0.0294	27.4854	0.0458	-0.1861	0.0935	0.6199	0	0	0	2.9e-07	0.8595	1.2659	0.8028	1.2105	0.0706278	0.0457662	0	0	-0.0627606	0.136054
Wbscr22	26.3444	586.881	4.4577	8.42e-11	27.6048	1068.72	7.3676	1.81e-07	0.0076	25.2032	0.0431	0.0069	26.8905	0.0253	-0.1425	0.0935	-0.7676	0	0	0	1.6e-06	0.1913	3.0541	0.1851	2.8641	0.0334954	0.0663385	0	0	-0.0627471	0.101449
Tm2d2	27.3412	518.613	6.5339	0	28.8972	679.454	8.4844	1.3e-24	0.0126	25.9693	0.0501	0.0125	27.7047	0.0408	-0.0131	0.0933	-0.2943	1.28e-08	0	0	0.000102	0.3273	2.3424	0.345	2.0878	-0.0513043	0.121947	0	0	-0.0626392	0.008
Tmem60	27.5019	1785.61	14.5975	6.13e-17	29.5586	1272.74	8.7518	4.66e-12	0.0082	27.0614	0.0152	0.0069	28.8696	0.0227	-0.243	0.0933	0.5747	0	0	0	3.82e-07	0.2195	2.8624	0.1974	2.8114	0.111955	0.0181404	0	0	-0.0626334	0.188406
Wasf2	26.8622	2046.28	14.3596	2.52e-12	28.6428	2357.11	23.7919	6.54e-22	0.007	26.4993	0.013	0.0101	28.2693	0.0121	0.5229	0.0933	-0.1104	0	1.99e-14	1.45e-21	3.73e-07	0.1861	3.1751	0.283	2.3762	-0.342403	0.336209	0	0	-0.0626121	-0.306931
2002-03-01	25.6871	565.12	5.4842	2.93e-17	27.0159	876.686	10.0721	9.38e-22	0.0097	24.5598	0.0436	0.0115	26.1987	0.0299	0.2448	0.0932	-0.5455	0	0	0	1.5e-05	0.2376	2.753	0.3008	2.2573	-0.210106	0.219599	0	0	-0.0625565	-0.156522
Ctsa	28.6322	1478.34	26.0104	0	30.7019	1264.28	23.2799	0	0.0176	28.0752	0.019	0.0184	29.9442	0.0238	0.0643	0.093	0.3202	6.04e-15	0	0	0.000112	0.4944	1.8681	0.5468	1.6461	-0.0958303	0.134864	0	0	-0.0624161	-0.0434783
Kmt2e	26.8565	1458.02	9.3738	2.52e-15	28.7143	1360.9	13.0925	1.64e-18	0.0064	26.3568	0.0181	0.0096	28.1073	0.0208	0.5753	0.0928	0.2029	0	0	0	9.73e-08	0.1697	3.3235	0.2698	2.3996	-0.371016	0.385023	0	0	-0.0622792	-0.333333
Tmem147	25.9685	948.034	19.7263	0	28.3213	556.77	13.0589	0	0.0208	25.2579	0.0267	0.0234	26.9305	0.0486	0.1718	0.0925	0.8648	0	0	0	1.2e-09	0.523	1.7753	0.6291	1.447	-0.168654	0.226883	0	0	-0.062108	-0.111111
Ndufv1	27.8893	792.9	8.8418	2.49e-22	29.0328	2755.28	30.1644	3.81e-15	0.0112	26.9346	0.034	0.0109	28.7164	0.0104	-0.0285	0.0924	-1.702	1.5e-07	0	0	7.77e-05	0.2999	2.3542	0.3152	2.1052	-0.0485406	0.118279	0	0	-0.0620482	0.0275229
Snrpd3	28.625	1002.85	24.8696	0	30.8576	775.803	16.2439	0	0.0248	27.8146	0.0278	0.0209	29.6481	0.0383	-0.2435	0.0921	0.4636	0	0	0	5.99e-07	0.6871	1.4996	0.6173	1.4487	0.113073	0.0351349	0	0	-0.0618421	0.186603
Txnip	27.2591	1297.13	11.4374	2.75e-19	29.1101	1255.05	14.1417	3.3e-22	0.0088	26.681	0.0207	0.0113	28.4323	0.0227	0.3581	0.0917	0.1307	0	0	0	5.53e-07	0.2344	2.8556	0.3207	2.2086	-0.269099	0.292946	0	0	-0.0615954	-0.221239
Gnai3	29.3669	1133.52	18.0931	0	31.2348	1333.86	23.9387	0	0.016	28.6213	0.0253	0.018	30.4868	0.0228	0.173	0.0911	-0.1476	0	0	0	1.15e-08	0.4574	1.8686	0.5417	1.5327	-0.155621	0.219156	0	0	-0.0611904	-0.111111
Rad21	28.3248	1098.66	8.7119	5.91e-14	29.943	1653.02	12.2336	3.68e-11	0.0079	27.6006	0.0251	0.0074	29.3944	0.0178	-0.1019	0.0908	-0.4937	0	0	0	4.81e-06	0.2184	2.7711	0.217	2.6156	0.00645161	0.059451	0	0	-0.0610252	0.0675676
Edf1	24.828	993.87	30.0914	0	26.3078	1289.58	41.6947	0	0.0302	24.1992	0.0244	0.0323	25.7707	0.0201	0.0958	0.0908	-0.2847	0	0	0	9.17e-10	0.7266	1.4228	0.8314	1.187	-0.126052	0.198652	0	0	-0.0609801	-0.0650155
Mrpl20	27.6853	948.934	22.3883	0	29.2951	1287.19	28.029	0	0.0236	26.8829	0.0286	0.0218	28.6283	0.0223	-0.1164	0.0908	-0.3597	0	0	0	1.39e-05	0.6344	1.5477	0.6217	1.42	0.0204279	0.0899296	0	0	-0.0609676	0.0825688
Fam98c	27.1984	357.376	3.9842	3.1e-26	27.4662	1317.11	15.9692	2.21e-20	0.0111	25.2514	0.0708	0.0121	26.8865	0.0205	0.1192	0.0905	-1.7892	0	2.7e-23	0	3.06e-05	0.2801	2.521	0.3241	2.1241	-0.135761	0.186856	0	0	-0.0608149	-0.0826446
Txndc5	27.6727	1775.62	14.0257	1.47e-21	29.6896	1303.51	10.2219	5.42e-17	0.0079	27.2405	0.0154	0.0078	29.0034	0.0224	-0.013	0.0905	0.5401	4.88e-06	0	0	6.84e-06	0.2148	3.0953	0.2259	2.8201	-0.0491368	0.0975852	0	0	-0.0607825	0.0128205
Elof1	27.7387	663.901	10.4874	0	29.5796	675.864	9.7292	0	0.0158	26.6083	0.0402	0.0145	28.3288	0.0419	-0.1256	0.0904	0.0613	0	0	0	0.00012	0.4185	1.989	0.4082	1.8341	0.0252327	0.0844556	0	0	-0.0607332	0.0896552
Nop56	28.217	1274.54	10.0981	3.34e-18	29.7469	2421.8	22.3635	2.3e-16	0.0079	27.5959	0.0217	0.0092	29.3725	0.0122	0.2218	0.09	-0.8376	0	0	0	1.38e-05	0.2188	2.8649	0.2716	2.3243	-0.194404	0.232586	0	0	-0.0604851	-0.141304
Hnrnpu	28.1677	719.482	22.9984	0	29.4612	1387.15	42.361	0	0.0319	27.0867	0.0377	0.0305	28.8304	0.0209	-0.0658	0.09	-0.8549	2.36e-18	0	0	2.31e-05	0.8646	1.2332	0.8785	1.1215	-0.0158224	0.0995988	0	0	-0.0604813	0.0459016
Ik	28.7897	624.233	4.4396	6.27e-10	29.8012	1673.62	14.2043	2.9e-13	0.0071	27.4967	0.0441	0.0085	29.2614	0.0175	0.2534	0.0897	-1.3311	0	2.88e-25	0	2.14e-05	0.1945	2.9852	0.2469	2.4638	-0.212232	0.211624	0	0	-0.0603081	-0.164706
Hnrnpk	37.5576	1640.09	100.26	0	39.5188	3480.85	192.192	0	0.0612	36.6964	0.0224	0.0553	39.0482	0.0112	-0.1441	0.0896	-0.9977	0	0	0	1.29e-16	2.2392	0.5074	2.1532	0.4781	0.0399406	0.0612843	0	0	-0.0602281	0.106691
Ciapin1	30.0693	762.873	8.2333	3.49e-19	31.1909	2285.59	22.734	8e-19	0.0108	28.9047	0.038	0.0099	30.7471	0.0135	-0.1174	0.0891	-1.4942	0	0	0	4.8e-05	0.3106	2.3271	0.3052	2.1571	0.0176933	0.0788095	0	0	-0.0599211	0.0909091
Slfn2	25.7376	854.705	17.8948	0	27.8884	566.546	24.0004	0	0.0209	24.9648	0.0293	0.0423	26.5509	0.047	1.0171	0.0889	0.6825	0	0	0	0	0.5197	1.8187	1.1169	1.0187	-0.534694	0.785315	0	0	-0.0597381	-0.50591
Acap1	29.4997	479.789	4.1109	7.08e-16	30.1398	1515.8	14.34	2.57e-19	0.0086	27.7776	0.0579	0.0095	29.5386	0.0195	0.1421	0.0887	-1.5691	0	0	0	4.71e-05	0.2373	2.698	0.2798	2.289	-0.151894	0.178681	0	0	-0.0596169	-0.0947368
Rnh1	26.6275	1614.89	39.344	0	29.3663	546.314	13.1347	0	0.0243	26.1788	0.0164	0.024	27.8335	0.0511	-0.0141	0.0884	1.638	3.35e-08	9.97e-25	0	9.18e-05	0.6341	1.5803	0.6641	1.4231	-0.0451739	0.110463	0	0	-0.0594499	0.0125
Fam104a	28.4757	1111.55	13.5554	0	30.07	1576.92	20.8886	0	0.0122	27.7487	0.025	0.0133	29.4877	0.0187	0.121	0.0877	-0.4187	0	0	0	2.67e-05	0.3377	2.2589	0.3901	1.9237	-0.134325	0.174248	0	0	-0.0589737	-0.0827068
Orai1	28.3382	2066.94	28.4584	0	30.8858	768.304	12.8279	0	0.0137	27.9389	0.0136	0.0168	29.6765	0.0386	0.289	0.087	1.5026	0	1.99e-27	0	8.5e-10	0.3846	2.1311	0.4956	1.685	-0.223971	0.264748	0	0	-0.0585514	-0.184524
Rps12	30.2177	3171.39	97.0849	0	32.2615	2141	91.1902	0	0.0305	29.9105	0.0095	0.0427	31.7644	0.0148	0.486	0.0868	0.6394	0	7.2e-24	0	0	0.9087	1.2356	1.3504	0.839	-0.327088	0.472706	0	0	-0.0583641	-0.285714
Atp5j2	29.0843	1655.54	42.9724	0	31.2968	995.145	31.0687	0	0.0259	28.5706	0.0173	0.0313	30.3181	0.0304	0.271	0.0856	0.8136	0	1.32e-23	0	5.4e-21	0.7407	1.3757	0.9417	1.0593	-0.213444	0.298688	0	0	-0.0576388	-0.172524
Nudt5	28.3263	2188.35	14.2233	2.35e-11	30.8325	793.263	4.9573	9.56e-08	0.0065	27.9552	0.0128	0.0063	29.6624	0.0374	-0.0512	0.0855	1.5434	7.54e-16	0	0	6.79e-06	0.1823	3.0881	0.1845	2.7641	-0.0119241	0.117217	0	0	-0.0575543	0.031746
Commd10	27.0532	876.966	7.9829	1.95e-17	28.9132	752.538	5.8045	5.41e-12	0.0091	26.2175	0.0301	0.0077	27.8119	0.0369	-0.2289	0.0852	0.2924	0	2.04e-12	0	7.32e-07	0.2377	2.7355	0.2128	2.6417	0.117011	0.0355074	0	0	-0.057328	0.181818
Rgs19	27.6093	856.919	15.7914	0	28.9259	1432.1	30.1171	0	0.0184	26.7216	0.0312	0.0211	28.3464	0.0198	0.1921	0.0852	-0.6556	0	0	0	3.65e-10	0.489	1.8271	0.5975	1.4714	-0.18159	0.241743	0	0	-0.0573194	-0.127962
C1qbp	28.6964	1155.73	20.0674	0	30.0126	2670.35	38.9587	0	0.0173	27.9742	0.0243	0.0145	29.6569	0.0112	-0.2547	0.0843	-1.1193	0	5.32e-21	0	5.15e-06	0.4826	1.885	0.4293	1.8335	0.124156	0.0280884	0	0	-0.0567389	0.193103
Wdr83os	27.8228	475.992	10.1335	0	29.4204	528.407	10.5362	0	0.0213	26.271	0.0553	0.02	27.8508	0.0527	-0.0906	0.0843	-0.0693	0	0	0	8.21e-05	0.559	1.6558	0.5538	1.5192	0.00938967	0.0899157	0	0	-0.0567237	0.065
Sri	31.6687	2003.54	89.458	0	33.3522	3381.78	143.479	0	0.0447	31.1505	0.0155	0.0424	33.0138	0.0098	-0.0785	0.0838	-0.6643	8.63e-19	5.12e-24	0	1.2e-05	1.3788	0.8832	1.4011	0.7992	-0.0159161	0.105105	0	0	-0.05644	0.0542453
Copz1	27.7488	1461.14	32.7608	0	30.0398	733.015	15.4708	0	0.0224	27.2164	0.0186	0.0212	28.844	0.0394	-0.0813	0.0838	1.079	0	0	0	4.28e-05	0.6087	1.5796	0.6092	1.4349	-0.000820749	0.100843	0	0	-0.0564277	0.0566038
Magoh	26.9134	625.592	10.964	0	27.7327	1899.26	32.4613	0	0.0175	25.7809	0.0414	0.0171	27.3224	0.0144	-0.0295	0.0838	-1.525	3.32e-06	6.24e-23	0	0.000125	0.45	1.8957	0.4683	1.698	-0.0390775	0.116431	0	0	-0.0564189	0.0233918
Rab8a	29.1645	1253.56	18.9255	0	32.2967	465.333	7.252	0	0.0151	28.4913	0.0227	0.0156	30.1892	0.0649	0.0426	0.0835	1.5151	0	0	0	6.96e-05	0.4301	1.9585	0.4705	1.7096	-0.0858661	0.14559	0	0	-0.056242	-0.0320513
Tmem248	26.796	438.629	8.347	0	28.3467	474.922	6.8525	1.66e-25	0.019	25.2343	0.0576	0.0144	26.7353	0.0566	-0.4013	0.0834	-0.0266	0	0	2.66e-10	6.96e-09	0.4792	1.864	0.3856	1.8872	0.242739	-0.0122933	0	0	-0.056143	0.319444
Lamtor5	27.1302	2465.96	49.4084	0	29.1886	1097.43	21.9094	0	0.02	26.8163	0.0109	0.02	28.4114	0.0259	0.0044	0.0834	1.2412	0.0574	5.15e-22	0	1.83e-05	0.5338	1.7491	0.5649	1.5235	-0.055054	0.14808	0	0	-0.056143	0
Lamtor4	28.0537	900.029	43.0767	0	29.8383	837.193	40.9571	0	0.0478	27.1826	0.0303	0.049	28.7956	0.0344	0.0355	0.0832	0.1843	5.31e-10	1.09e-26	0	6.92e-08	1.293	0.9387	1.4056	0.7937	-0.0801081	0.182689	0	0	-0.0560155	-0.0244898
Rdx	28.3903	1932.41	21.6628	7.22e-25	30.1103	1867.95	23.3955	2.99e-27	0.0112	27.9619	0.0146	0.0125	29.6134	0.0159	0.1654	0.0828	0.1196	0	0	1.25e-26	3.43e-05	0.3133	2.3629	0.3693	2.0194	-0.151638	0.1701	0	0	-0.0557687	-0.104
Med31	30.696	1615.05	9.6506	1.36e-10	32.2809	2667.13	17.7685	5.98e-12	0.006	30.1067	0.0187	0.0067	31.8805	0.012	0.1563	0.0826	-0.6458	0	0	0	1.9e-05	0.1804	3.1868	0.212	2.7102	-0.149057	0.175854	0	0	-0.055639	-0.104478
Bcap29	28.4927	898.572	7.6775	2.92e-16	29.8948	1324.55	9.8713	7.49e-12	0.0085	27.605	0.0308	0.0075	29.2295	0.0221	-0.1945	0.0825	-0.4815	0	0	0	3e-06	0.2351	2.6681	0.2184	2.5313	0.0764652	0.0540434	0	0	-0.0555774	0.133333
Nsmce2	27.3772	903.92	8.731	5.64e-20	28.8494	1147.12	9.8684	1.67e-13	0.0097	26.5559	0.0294	0.0086	28.1163	0.0245	-0.1674	0.0824	-0.2609	0	5.09e-21	0	1.44e-06	0.2563	2.5915	0.2405	2.5224	0.0656965	0.0273945	0	0	-0.0554981	0.127907
Mtx2	30.9645	1037.62	9.2678	3.35e-19	32.2284	2648.79	26.1517	3.51e-18	0.0089	30.0526	0.029	0.0099	31.8119	0.012	0.1494	0.0821	-1.2733	0	0	0	1.4e-05	0.2682	2.5572	0.3116	2.1112	-0.139281	0.211254	0	0	-0.0553032	-0.10101
Hmox2	25.7646	803.996	9.5524	9.42e-25	27.4358	716.639	9.2251	1.1e-23	0.0119	24.9492	0.0311	0.0129	26.3999	0.0368	0.1192	0.0815	0.2436	0	0	0	6.63e-05	0.2956	2.4513	0.337	2.118	-0.122849	0.157365	0	0	-0.054951	-0.0775194
Ccm2	28.4741	2050.84	14.7236	8.54e-15	30.2547	1624.24	15.4115	2.09e-16	0.0072	28.0677	0.0137	0.0095	29.6893	0.0183	0.4046	0.081	0.415	0	0	0	1.02e-06	0.2015	3.0133	0.2819	2.3157	-0.285208	0.301248	0	0	-0.054619	-0.242105
Cdk4	29.7598	1373.9	23.0294	0	31.2952	1932.19	28.8905	0	0.0167	29.1074	0.0213	0.015	30.777	0.0159	-0.1615	0.0805	-0.4211	0	1.98e-27	0	6.36e-05	0.4868	1.8131	0.4599	1.7214	0.058491	0.0532706	0	0	-0.0542483	0.113333
Rps18-ps3	30.6416	1181.74	55.6065	0	31.9341	2849.18	130.771	0	0.0471	29.8502	0.0253	0.0459	31.5624	0.0111	-0.037	0.0805	-1.1878	3.08e-06	2.22e-23	0	0.00217	1.402	0.8575	1.4506	0.7762	-0.0335034	0.104741	0	0	-0.0542481	0.0261438
Cwc15	28.0602	1521.8	29.2013	0	30.1702	825.378	14.15	0	0.0191	27.5196	0.0183	0.0172	29.0924	0.0352	-0.1517	0.0802	0.9435	0	0	0	8.13e-05	0.5235	1.7798	0.4982	1.6616	0.0507828	0.0711363	0	0	-0.0540622	0.110465
Sypl	26.4415	1173.22	36.4862	0	29.1162	447.936	14.6283	0	0.0311	25.84	0.022	0.0328	27.3166	0.0609	0.076	0.0802	1.4663	1.19e-14	1.03e-23	0	4.83e-07	0.8003	1.3031	0.8879	1.1246	-0.0986598	0.158723	0	0	-0.054055	-0.0518293
Sf3a3	30.4307	1537.28	11.8433	3.84e-13	32.2146	1490.38	9.8246	3.37e-08	0.0077	29.8218	0.0194	0.0066	31.512	0.0211	-0.2253	0.0795	0.1247	0	7.54e-18	0	7.2e-07	0.2296	2.7171	0.2077	2.6483	0.105441	0.0259789	0	0	-0.0536367	0.166667
Fam204a	30.2869	1735.95	18.0436	3.76e-24	32.111	1511.65	12.3593	3.45e-15	0.0104	29.7451	0.0172	0.0082	31.4247	0.0208	-0.3423	0.0792	0.2738	0	0	0	4.41e-08	0.3078	2.3498	0.2546	2.3974	0.208955	-0.0198548	0	0	-0.0534484	0.268293
Anapc13	27.7932	964.497	15.0456	0	29.4919	863.217	15.8234	0	0.0155	26.9876	0.0282	0.0183	28.5082	0.0331	0.2387	0.0791	0.228	0	0	0	1.75e-09	0.418	1.9398	0.5222	1.5571	-0.19954	0.245777	0	0	-0.053339	-0.153005
Snf8	25.3697	335.414	5.2583	0	26.2546	487.23	8.1534	3.1e-26	0.0157	23.5802	0.0703	0.0167	24.9008	0.0512	0.0943	0.0786	-0.4587	0	0	0	1.03e-05	0.3688	2.1718	0.4167	1.8315	-0.114951	0.185804	0	0	-0.0530344	-0.0598802
Sf3b6	28.3623	1712.42	39.5409	0	30.1547	1276.42	28.994	0	0.0232	27.8805	0.0163	0.0227	29.4413	0.0231	-0.0286	0.0786	0.5067	3.42e-05	9.12e-26	0	0.000104	0.643	1.539	0.6666	1.395	-0.0354035	0.103226	0	0	-0.053014	0.0220264
Rbm3	43.4334	2504.68	186.105	0	45.8674	2551.93	178.164	0	0.0747	42.6586	0.017	0.0701	45.0228	0.0176	-0.093	0.0778	0.052	1e-18	1.32e-13	2.1e-11	0.0145	3.1653	0.3195	3.1296	0.3167	0.0114072	0.00884117	0	0	-0.0525112	0.0656205
Hsdl2	27.6429	342.709	3.9269	1.72e-19	28.3484	560.434	6.1998	3.91e-16	0.0115	25.552	0.0745	0.0111	26.9628	0.0481	-0.0521	0.0775	-0.6305	1.33e-08	7.11e-19	0	6.07e-05	0.2914	2.4329	0.2975	2.1687	-0.0205042	0.121824	0	0	-0.0523239	0.036036
Dcun1d5	27.1102	897.364	21.4338	0	28.0682	2556.38	54.281	0	0.0239	26.3021	0.0293	0.0212	27.7523	0.0109	-0.1732	0.0774	-1.4296	0	0	0	1.71e-05	0.6272	1.5631	0.5907	1.4825	0.0617911	0.0543676	0	0	-0.0522551	0.127358
Ncf1	28.6808	416.368	6.7871	0	28.7579	1825.06	53.8878	0	0.0163	26.8183	0.0646	0.0295	28.2967	0.0156	0.8539	0.0774	-2.0535	0	0	0	0	0.4362	1.9487	0.8338	1.1977	-0.476853	0.627035	0	0	-0.0522464	-0.447458
Tipin	27.9417	2336.92	51.5677	0	31.0223	484.553	8.3643	0	0.022	27.594	0.0119	0.0173	29.1148	0.0601	-0.3483	0.0774	2.3367	0	4.04e-18	0	1.18e-09	0.6071	1.6378	0.4981	1.7175	0.218832	-0.0464047	0	0	-0.0522346	0.271676
Hexa	27.2102	815.165	17.3426	0	29.5787	455.872	8.3359	0	0.0213	26.3087	0.0323	0.0183	27.7511	0.0609	-0.217	0.077	0.9141	0	4.8e-25	0	5.32e-06	0.5561	1.7049	0.5047	1.6444	0.101843	0.0367915	0	0	-0.0519763	0.163934
Zmat5	28.9223	2480.21	23.3407	2.85e-20	31.8527	571.712	5.6782	1.17e-16	0.0094	28.5817	0.0116	0.01	30.1447	0.0527	0.0845	0.0768	2.1886	0	0	0	5.18e-05	0.2698	2.5815	0.2985	2.2302	-0.0961474	0.15752	0	0	-0.0518499	-0.06
Dnajb6	28.9074	1202.83	43.2861	0	30.4683	1278.69	36.1915	0	0.0359	28.2091	0.0237	0.0283	29.7461	0.0233	-0.3403	0.0765	-0.0238	0	0	3.07e-24	4.25e-17	1.0119	1.1306	0.8423	1.1598	0.201353	-0.0251768	0	0	-0.0516706	0.268551
Psmb5	26.0759	880.364	25.4364	0	27.7817	684.538	21.8293	0	0.0289	25.2993	0.0288	0.032	26.6677	0.0389	0.1459	0.076	0.4354	0	1.01e-17	0	5.17e-10	0.7256	1.4258	0.8388	1.1853	-0.134955	0.202902	0	0	-0.051313	-0.096875
Tubb5	24.8706	566.624	29.102	0	27.0465	349.665	16.6834	0	0.0513	23.8077	0.0423	0.0477	25.0933	0.0719	-0.105	0.0759	0.7658	0	0	0	0.00252	1.2204	1.0927	1.1964	1.0669	0.0200602	0.0241822	0	0	-0.0512328	0.0754717
Ncln	27.482	1183.48	6.4147	3.1e-07	29.4517	726.492	5.8006	6.72e-13	0.0054	26.8442	0.0227	0.008	28.2921	0.039	0.5595	0.0758	0.7791	0	0	0	8.5e-07	0.1459	3.4825	0.2264	2.5424	-0.355565	0.369769	0	0	-0.0511768	-0.325
Glrx5	25.9062	734.386	17.6564	0	27.5465	613.408	11.8682	0	0.024	24.9962	0.0341	0.0195	26.3371	0.0428	-0.2974	0.0754	0.3283	0	1.42e-18	0	2.09e-07	0.5957	1.6512	0.5087	1.6329	0.171024	0.0112071	0	0	-0.050913	0.230769
Arhgdib	58.5572	5912.99	357.746	0	61.5388	8452.4	505.75	0	0.0606	57.9418	0.0098	0.06	61.049	0.0072	-0.0137	0.0754	-0.4416	5.12e-05	6.6e-14	0	9.45e-16	3.4947	0.243	3.6491	0.1876	-0.0423118	0.295309	0	0	-0.0508968	0.01
Chmp1a	28.3266	1674.28	18.8458	0	29.8335	1755.24	20.6342	2.49e-23	0.0112	27.8346	0.0167	0.0118	29.3267	0.0168	0.0698	0.0753	0.0025	9.69e-25	0	2.25e-18	6.39e-05	0.3113	2.3497	0.3454	2.0381	-0.0987261	0.152887	0	0	-0.0508786	-0.0508475
Mrpl34	29.2365	1154.5	11.9083	1.74e-23	30.2999	3495.17	41.2553	1.04e-25	0.0103	28.4991	0.0247	0.0118	30.0158	0.0086	0.1936	0.0748	-1.5217	0	0	0	1.59e-05	0.2941	2.4417	0.3515	2.0357	-0.1633	0.19944	0	0	-0.0505301	-0.127119
Siva1	26.9008	534.176	12.6753	0	28.1973	608.591	11.9761	0	0.0237	25.5801	0.0482	0.0197	26.9319	0.0443	-0.2656	0.0743	-0.1205	0	0	0	5.63e-07	0.6036	1.6115	0.5289	1.62	0.141237	-0.00524691	0	0	-0.0501933	0.203046
Nans	29.9101	519.393	7.2419	0	30.3152	1673.9	23.5672	0	0.0139	28.259	0.0545	0.0141	29.7503	0.0178	0.0156	0.0742	-1.6171	1.82e-10	6.88e-21	0	0.00015	0.3936	2.0563	0.417	1.8321	-0.0561151	0.122373	0	0	-0.0501272	-0.0141844
Dstn	31.1937	1819.8	97.2253	0	32.7701	2103.45	123.202	0	0.0534	30.6443	0.0169	0.0585	32.2456	0.0154	0.132	0.0735	-0.1362	0	2.98e-16	0	4.61e-17	1.63	0.7751	1.8834	0.5951	-0.134544	0.30247	0	0	-0.0496595	-0.0871795
Gm8730	34.6485	2483.8	120.181	0	36.8307	1501.91	71.4896	0	0.0484	34.1459	0.0138	0.0477	35.9292	0.0239	-0.0223	0.0734	0.7979	7.47e-11	2.47e-27	0	0.0102	1.6467	0.7318	1.7118	0.6594	-0.0380301	0.109797	0	0	-0.0496337	0.0146751
Abhd17c	27.0134	1636.18	12.8587	3.24e-13	28.4843	1529.85	8.7256	1.88e-05	0.0078	26.5626	0.0163	0.0057	27.9487	0.0183	-0.4553	0.0734	0.1645	0	5.33e-19	0	1.42e-09	0.2091	2.8971	0.1589	3.0321	0.315922	-0.0445236	0	0	-0.0495944	0.368421
Mcm4	27.1526	658.105	4.8573	1.13e-12	28.5509	702.867	4.9314	7.16e-08	0.0074	26.0608	0.0396	0.007	27.4084	0.0391	-0.0781	0.0727	-0.018	1.53e-13	4.2e-19	4.38e-17	4.97e-06	0.1911	3.0353	0.1912	2.7686	-0.000523013	0.0963303	0	0	-0.0491674	0.0571429
Mrpl24	28.7515	429.456	5.4297	0	29.0851	1112.45	15.2453	2.28e-25	0.0126	26.9327	0.0628	0.0137	28.3244	0.0254	0.1201	0.0727	-1.3036	0	1.89e-18	0	1.3e-05	0.34	2.2671	0.3872	1.9145	-0.121901	0.184173	0	0	-0.0491343	-0.080292
Kif5b	25.9898	755.163	14.7896	0	28.7668	322.701	9.4045	0	0.0196	25.1043	0.0333	0.0292	26.3984	0.0821	0.5778	0.0725	1.3011	0	5.35e-18	0	0	0.4901	1.8582	0.7692	1.2435	-0.362845	0.494331	0	0	-0.0490219	-0.328767
Chmp6	28.6841	2483.02	18.2205	9.48e-16	30.0844	3140.63	23.302	9.51e-10	0.0073	28.3341	0.0115	0.0074	29.7907	0.0095	0.0218	0.0723	-0.2758	1.1e-10	3.07e-27	0	2.07e-05	0.2067	2.9595	0.2223	2.5999	-0.0701754	0.138313	0	0	-0.0488945	-0.0135135
Sh3kbp1	28.6308	759.076	4.5937	8.27e-09	29.7367	1186.34	11.6415	1.93e-18	0.006	27.5785	0.0364	0.0098	28.9915	0.0245	0.6972	0.0721	-0.5718	0	0	0	5.7e-09	0.1665	3.3445	0.2832	2.3438	-0.412076	0.426956	0	0	-0.0487384	-0.387755
Mob2	27.5954	2318.73	21.5535	8.84e-20	29.194	1497.45	11.453	3.39e-10	0.0093	27.2446	0.0118	0.0077	28.6217	0.0191	-0.2724	0.0711	0.6943	0	3.41e-11	0	4.17e-07	0.2499	2.6659	0.2193	2.6228	0.139535	0.0164328	0	0	-0.0481138	0.207792
BC031181	24.7645	583.633	10.933	0	25.6569	912.551	19.5251	0	0.0187	23.7392	0.0408	0.0214	24.9382	0.0273	0.1932	0.0711	-0.579	0	3.19e-23	0	1.4e-08	0.4439	1.9339	0.531	1.5776	-0.16403	0.225849	0	0	-0.0480789	-0.126168
Junb	37.4901	2300.76	141.016	0	39.1481	3754.21	194.81	0	0.0617	36.861	0.016	0.052	38.7197	0.0103	-0.2458	0.071	-0.6334	0	7.6e-16	0	3.15e-23	2.2561	0.5682	2.0096	0.6181	0.122661	-0.0807313	0	0	-0.048004	0.186538
Tpd52	28.1153	213.239	3.9242	0	26.8201	941.734	21.6972	0	0.0184	24.8165	0.1164	0.023	26.0622	0.0278	0.32	0.0707	-2.0641	0	0	0	2.13e-10	0.4555	2.0202	0.5975	1.6214	-0.237657	0.24596	0	0	-0.0477972	-0.2
Ddost	29.3094	1310.65	46.1674	0	31.7944	570.559	15.2204	0	0.0352	28.6511	0.0219	0.0267	30.0869	0.0527	-0.399	0.0705	1.2688	0	6.32e-19	0	1.13e-24	1.0098	1.1208	0.7989	1.2027	0.263988	-0.0680968	0	0	-0.0477218	0.318352
Clptm1	28.3162	818.455	6.9597	1.96e-15	29.0847	2347.03	19.5313	1.07e-12	0.0085	27.3474	0.0335	0.0083	28.7169	0.0122	-0.0297	0.0705	-1.4517	0.000718	1.63e-22	0	2.51e-05	0.2308	2.7372	0.2392	2.4743	-0.0351171	0.106252	0	0	-0.0476897	0.0240964
Nme2	29.5953	2006.12	19.6642	1.72e-18	30.8723	3848.94	25.0209	5.9e-08	0.0098	29.1571	0.0146	0.0065	30.6105	0.008	-0.5913	0.0702	-0.8722	0	0	0	1.94e-13	0.2869	2.3439	0.1993	2.6554	0.439538	-0.117308	0	0	-0.0474804	0.507692
Cmtm6	26.9429	2146.42	32.4461	0	28.8467	879.363	13.7489	0	0.0151	26.589	0.0124	0.0157	27.911	0.0317	0.0496	0.07	1.3573	1.08e-15	3.51e-16	0	4.14e-05	0.401	2.0774	0.4346	1.8023	-0.0773125	0.152638	0	0	-0.0473648	-0.0382166
Srp72	27.1152	1556.54	10.4134	5.58e-10	29.0353	775.344	5.6176	6.28e-12	0.0067	26.6447	0.0171	0.0073	27.9677	0.0361	0.1161	0.0699	1.0743	0	0	0	1.55e-05	0.1784	3.1567	0.2019	2.7228	-0.116394	0.159358	0	0	-0.0473046	-0.0821918
Suclg1	28.1989	1269.74	20.7198	0	29.4697	1602.78	26.705	0	0.0163	27.5606	0.0218	0.0166	28.9163	0.0182	0.0285	0.0693	-0.2608	4.77e-10	8.76e-23	0	4.33e-05	0.4457	1.9187	0.4785	1.6862	-0.0685475	0.137884	0	0	-0.0468836	-0.0180723
Nedd8	26.1866	960.509	39.887	0	27.2059	1584.84	65.2135	0	0.0415	25.4804	0.0266	0.041	26.7292	0.017	-0.0186	0.069	-0.6427	2.35e-09	2.38e-24	0	1.24e-07	1.0572	1.0943	1.0935	0.9609	-0.0331962	0.138828	0	0	-0.0467204	0.0121951
Polr3k	28.0218	881.023	12.0385	0	28.9755	1667.38	20.868	1.12e-19	0.0137	27.1373	0.0308	0.0125	28.4657	0.0171	-0.1333	0.0689	-0.8478	0	7.45e-21	0	5.59e-05	0.37	2.1463	0.355	1.9865	0.0422535	0.080443	0	0	-0.0466667	0.096
Ankrd10	29.492	988.03	6.1089	1.9e-10	30.2498	3964.29	24.3244	2.42e-07	0.0062	28.6094	0.029	0.0061	30.0075	0.0076	-0.0116	0.0688	-1.9341	2.77e-06	1.28e-19	0	8.06e-06	0.1751	3.1852	0.1852	2.8055	-0.0545356	0.135341	0	0	-0.0465917	0.0163934
Clec12a	36.9303	1850.57	125.306	0	38.5008	2609.45	156.822	0	0.0679	36.1775	0.0195	0.0601	37.9199	0.0145	-0.1765	0.0679	-0.4247	0	7.87e-17	0	6.18e-15	2.4416	0.5141	2.273	0.5329	0.0741751	-0.0352787	0	0	-0.0459495	0.129784
Eif2b2	31.0001	2764.42	17.9881	2.31e-12	32.7207	1765.28	12.9778	1.6e-14	0.0065	30.6352	0.0111	0.0074	32.1105	0.0182	0.1763	0.0679	0.7149	0	2.36e-23	0	2.2e-05	0.1991	3.0552	0.2355	2.52	-0.154565	0.212381	0	0	-0.0459445	-0.121622
Wbp2	28.6692	365.596	4.1725	0	28.4423	1360.06	12.9928	1.49e-20	0.0114	26.5683	0.0727	0.0095	27.8477	0.0206	-0.2608	0.0679	-1.8203	0	0	0	7.36e-07	0.3026	2.4017	0.2658	2.3791	0.13845	0.00949939	0	0	-0.0459428	0.2
Gmfb	29.233	1901.06	13.2171	4.15e-12	31.9661	541.612	4.2323	5.82e-13	0.007	28.7837	0.0151	0.0078	30.1695	0.0557	0.1731	0.0678	1.8799	0	0	0	2.88e-05	0.2008	2.983	0.2362	2.5372	-0.149873	0.175706	0	0	-0.0459338	-0.102564
Neu1	30.6603	1002.79	7.5667	7.89e-16	31.7301	1837.29	18.1564	3.2e-22	0.0076	29.7382	0.0297	0.0099	31.1691	0.017	0.3917	0.0678	-0.8066	0	1.52e-18	0	2.06e-07	0.2244	2.8647	0.307	2.1777	-0.269055	0.31547	0	0	-0.0459076	-0.232323
Ppt1	28.5661	1706.61	14.2392	2.92e-19	29.9353	1729.92	13.8848	8.1e-11	0.0083	28.0682	0.0166	0.008	29.4159	0.017	-0.0489	0.0677	0.0335	8.04e-17	4.81e-27	0	1.31e-05	0.2328	2.8075	0.2361	2.5855	-0.0139771	0.0858635	0	0	-0.0458154	0.0375
Rnf146	26.1127	1052.19	8.1325	1.88e-14	28.0301	565.992	4.4462	5.54e-10	0.0077	25.4739	0.0242	0.0079	26.6933	0.0473	0.0231	0.0675	0.9642	3.49e-06	0	0	1.46e-05	0.1966	3.0649	0.2095	2.6898	-0.0615752	0.139453	0	0	-0.0456819	-0.0253165
Hsd17b12	28.2493	1388.86	12.1703	5.37e-15	30.2131	732.614	7.1025	4.71e-14	0.0088	27.6757	0.0199	0.0097	28.9988	0.0396	0.1459	0.0674	0.9903	0	1.9e-26	0	6.67e-05	0.2426	2.6103	0.2798	2.2809	-0.132952	0.144417	0	0	-0.045626	-0.0927835
Psmd10	26.5251	1598.12	15.2868	2.67e-19	27.8811	1388.13	13.9409	4.13e-17	0.0096	26.0722	0.0163	0.01	27.3185	0.0197	0.0681	0.0674	0.2726	9.17e-19	1.45e-24	0	5.67e-05	0.2476	2.6738	0.2741	2.3526	-0.09668	0.13653	0	0	-0.0456211	-0.04
Zcrb1	26.5631	776.203	15.952	0	28.4357	501.239	7.6372	0	0.0205	25.6685	0.0331	0.0153	26.8896	0.0536	-0.4271	0.067	0.6943	0	0	0	8.5e-12	0.5257	1.7401	0.4083	1.8763	0.287534	-0.0725897	0	0	-0.0454116	0.339869
Minos1	29.3967	2253.78	69.1999	0	31.3155	1018.38	29.6522	0	0.0307	29.0026	0.0129	0.0291	30.3737	0.0298	-0.0737	0.0666	1.2076	0	0	0	5.15e-07	0.8901	1.2235	0.8857	1.1139	0.00496782	0.098393	0	0	-0.045141	0.0549828
Psmb1	29.9959	1785.66	87.9778	0	31.9772	904.246	44.7495	0	0.0492	29.48	0.0165	0.0496	30.864	0.0341	0.0098	0.0662	1.0446	0.000192	2.89e-17	0	9.2e-07	1.4477	0.8493	1.5209	0.7297	-0.0481294	0.163903	0	0	-0.0448419	-0.00806452
Abracl	24.546	451.802	10.522	0	26.6011	289.126	7.2119	0	0.0233	23.26	0.0515	0.0249	24.3467	0.0843	0.0984	0.0659	0.7107	0	0	0	3.39e-07	0.538	1.7334	0.6053	1.4657	-0.111185	0.182643	0	0	-0.0446344	-0.064257
Psmd2	27.1452	1505.64	17.6228	3.07e-21	29.5467	505.112	6.6966	1.45e-24	0.0117	26.6481	0.0179	0.0132	27.892	0.0554	0.1828	0.0658	1.6336	0	0	0	3.44e-06	0.3112	2.3201	0.3683	1.9136	-0.155037	0.212427	0	0	-0.044597	-0.113636
Tspan31	28.2442	899.493	7.5917	4.38e-17	29.0266	2188.36	15.8065	3.69e-10	0.0084	27.3573	0.0307	0.0072	28.6334	0.0131	-0.2209	0.0658	-1.227	0	2.56e-20	0	7.86e-07	0.2295	2.8357	0.2067	2.7339	0.110305	0.0372362	0	0	-0.0445668	0.166667
Tsc22d4	26.1282	926.688	27.9734	0	28.1005	493.502	15.921	0	0.03	25.3834	0.0277	0.0322	26.566	0.0539	0.1025	0.0657	0.9597	0	7.3e-21	0	3.95e-10	0.7591	1.3822	0.8543	1.1559	-0.111436	0.195778	0	0	-0.0445155	-0.068323
Cnot7	28.8845	499.502	5.5329	5.38e-24	29.1783	1351.97	14.0305	8.02e-18	0.0111	27.2765	0.0547	0.0104	28.5467	0.0212	-0.0954	0.0657	-1.367	0	0	0	2.97e-05	0.3004	2.3633	0.2954	2.2339	0.0169262	0.0579256	0	0	-0.0444955	0.0673077
Ing2	29.2313	1207.4	15.4871	0	32.288	400.881	4.0837	5.26e-21	0.0128	28.5181	0.0236	0.0103	29.841	0.0742	-0.3244	0.0654	1.6513	0	1.93e-12	0	5.25e-08	0.3633	2.2139	0.3012	2.2763	0.206175	-0.0274129	0	0	-0.0443316	0.242718
D1Ertd622e	26.6398	494.51	8.289	0	26.9934	1286.01	22.0263	0	0.0167	25.2536	0.0515	0.0171	26.4215	0.0206	0.0344	0.0652	-1.324	7.07e-16	1.08e-25	0	0.000178	0.4215	2.0416	0.4504	1.815	-0.0641652	0.124848	0	0	-0.0442026	-0.0233918
Dok3	28.783	1560.92	43.7634	0	30.4915	954.036	29.0094	0	0.0281	28.2367	0.0181	0.0304	29.5407	0.031	0.1147	0.0651	0.7768	0	0	0	1.5e-09	0.7881	1.3498	0.8991	1.1342	-0.123457	0.19009	0	0	-0.0441425	-0.0756579
Llph	27.6179	1001.68	19.9877	0	28.8569	1095.91	22.6443	0	0.0199	26.8618	0.0269	0.0207	28.0997	0.0257	0.0506	0.065	-0.0673	3.21e-21	3.59e-17	1.06e-15	4.11e-06	0.5352	1.7593	0.5793	1.5102	-0.0761264	0.164945	0	0	-0.0440539	-0.0386473
Gadd45gip1	27.7648	1551.24	19.341	5.14e-25	29.0949	1461.9	18.365	2.7e-19	0.0124	27.2598	0.0177	0.0126	28.5121	0.0195	0.0191	0.0648	0.1386	0.00193	1.73e-24	0	0.000191	0.3394	2.2318	0.3584	2.0321	-0.0530134	0.0982727	0	0	-0.0439217	-0.015873
Amdhd2	28.6487	734.087	5.5989	2.26e-14	29.5026	1282.32	10.4944	9.88e-13	0.0076	27.5562	0.0376	0.0082	28.8178	0.0225	0.1058	0.0646	-0.7441	0	9.34e-24	0	3.09e-05	0.2098	2.9103	0.2352	2.5229	-0.107993	0.153553	0	0	-0.0437785	-0.0731707
Fermt3	24.37	421.659	10.1775	0	25.5623	410.782	13.4108	0	0.0241	23.0059	0.0549	0.0327	24.054	0.0587	0.4394	0.0643	0.0963	0	0	0	0	0.5515	1.6844	0.7852	1.2261	-0.297631	0.373787	0	0	-0.0435728	-0.262997
Bud31	27.3738	493.546	6.6942	0	28.6078	527.868	8.0423	0	0.0136	25.93	0.0526	0.0152	27.1065	0.0514	0.1689	0.064	-0.0338	0	0	8.84e-21	3.45e-06	0.3511	2.2214	0.41	1.8393	-0.143659	0.207742	0	0	-0.0434029	-0.105263
Hist1h2bc	25.9361	430.46	5.5096	0	27.4182	379.025	5.1789	0	0.0128	24.447	0.0569	0.0137	25.5559	0.0675	0.0945	0.064	0.2471	0	0	0	8.75e-05	0.3119	2.4723	0.3491	2.1648	-0.10656	0.142045	0	0	-0.0433912	-0.0656934
Selplg	27.1543	479.462	9.9777	0	28.5239	463.915	11.3302	0	0.0208	25.6805	0.0536	0.0244	26.8453	0.0579	0.2315	0.064	0.1102	0	6.94e-22	0	4.49e-10	0.5331	1.8296	0.6516	1.4776	-0.18186	0.238224	0	0	-0.0433893	-0.147541
Ywhaz	27.1902	969.342	13.8024	0	28.2125	1364.95	21.5622	2.33e-27	0.0142	26.4337	0.0273	0.0159	27.6254	0.0202	0.1576	0.0636	-0.4328	0	2.49e-22	0	6.39e-06	0.3752	2.089	0.4376	1.7599	-0.142596	0.186999	0	0	-0.0431378	-0.106918
Ifngr1	31.9806	2175.5	90.7505	0	33.245	3417.58	128	0	0.0419	31.4876	0.0144	0.0373	32.9058	0.0097	-0.1684	0.0636	-0.5736	0	0	0	1.07e-07	1.3055	0.9399	1.2284	0.9166	0.0627646	0.02542	0	0	-0.0430988	0.123324
Atf1	28.0282	1296.66	15.2476	1.52e-26	29.164	1657.66	20.9085	2.83e-22	0.0117	27.4149	0.0212	0.0126	28.6413	0.0173	0.1039	0.0631	-0.2946	0	1.5e-13	0	5.98e-05	0.3199	2.2711	0.3603	1.957	-0.112129	0.160501	0	0	-0.0428193	-0.0714286
Pih1d1	29.2265	238.902	2.3647	7.48e-19	27.5073	2446.52	24.8949	5.78e-18	0.0099	26.0292	0.1091	0.0101	27.1831	0.0112	0.0362	0.0626	-3.2865	0	7.45e-17	0	5.88e-05	0.2569	2.6213	0.2762	2.307	-0.0698769	0.136238	0	0	-0.0424492	-0.019802
Akirin1	28.5111	728.518	9.9465	0	30.1793	566.633	8.4703	0	0.0136	27.4233	0.0377	0.015	28.6364	0.0505	0.135	0.0624	0.4207	0	5.4e-17	0	1.13e-05	0.3735	2.0923	0.4275	1.7867	-0.126316	0.171042	0	0	-0.0423622	-0.0933333
Atp5g1	28.0696	1097.2	51.5583	0	29.8401	683.004	29.7455	0	0.0472	27.3526	0.0249	0.0439	28.561	0.0417	-0.105	0.0624	0.7436	0	6.78e-13	0	8.11e-10	1.2834	0.9447	1.2357	0.884	0.0386016	0.0686652	0	0	-0.0423094	0.0751708
Kpna2	28.0988	517.971	5.1965	5.1e-22	28.6111	1014.75	11.228	2.96e-24	0.01	26.6363	0.0514	0.0111	27.8102	0.0274	0.1442	0.0622	-0.909	0	5.8e-21	0	8.43e-05	0.2665	2.5778	0.3072	2.2875	-0.132487	0.126907	0	0	-0.0422111	-0.0990991
Polr2d	30.44	1184.4	9.9166	2.02e-14	31.752	1297.05	10.6412	5.7e-14	0.0084	29.6684	0.0251	0.0082	30.9733	0.0239	-0.0274	0.0621	-0.0699	7.97e-13	0	1.33e-24	3.26e-05	0.2482	2.6808	0.2532	2.4036	-0.0197472	0.115327	0	0	-0.0421298	0.0243902
Glipr1	27.6446	1163.48	33.8562	0	28.8887	1127.84	40.9899	0	0.029	26.9715	0.0233	0.0364	28.1561	0.025	0.3258	0.062	0.1008	0	9.48e-22	0	2.77e-20	0.7752	1.4834	1.024	1.1631	-0.242969	0.275385	0	0	-0.0420726	-0.203297
Blvra	27.4451	702.966	6.2065	3.16e-17	27.9848	1749.27	15.9345	6.08e-14	0.0088	26.3836	0.0376	0.0091	27.5327	0.0157	0.0488	0.0615	-1.2556	1.13e-11	0	0	3.63e-05	0.2309	2.7627	0.251	2.4595	-0.0800797	0.123277	0	0	-0.0417358	-0.032967
Ltb4r1	27.086	763.922	25.7569	0	28.328	734.48	32.4937	0	0.0336	26.1316	0.0346	0.0442	27.2651	0.0372	0.398	0.0613	0.1039	0	5.48e-26	9.25e-26	0	0.8752	1.3083	1.2057	0.9594	-0.274115	0.363665	0	0	-0.0415733	-0.239819
Tmem192	27.5732	1387.28	9.897	2.35e-14	29.343	730.862	5.3108	2.46e-11	0.0071	27.0207	0.0196	0.0073	28.1817	0.0386	0.0285	0.0607	0.9812	8.43e-07	3.2e-23	0	1.14e-05	0.1924	3.1466	0.2028	2.7589	-0.0512821	0.140527	0	0	-0.0411969	-0.0273973
Psmd3	30.3767	2917.22	16.4496	2.27e-09	31.5604	4940.88	29.5799	1.04e-07	0.0056	30.0497	0.0103	0.006	31.3377	0.0064	0.0819	0.0606	-0.6906	1.19e-24	8.33e-19	0	1.34e-05	0.1694	3.2496	0.1879	2.7792	-0.0984566	0.169257	0	0	-0.0411007	-0.0666667
Trp53	29.2319	1870.59	12.6452	2.21e-08	30.7344	1294.43	12.6704	8e-18	0.0068	28.7686	0.0154	0.0098	30.0005	0.0232	0.5328	0.0605	0.5918	0	1.31e-18	0	4.8e-08	0.1942	2.9512	0.2928	2.195	-0.336749	0.34451	0	0	-0.0410626	-0.306122
Fbxo9	28.7213	1805.48	14.5376	1.44e-14	29.9132	1984.8	16.956	2.28e-14	0.008	28.2469	0.0158	0.0085	29.4542	0.0149	0.0897	0.0604	-0.0846	0	5.59e-20	2.18e-19	3.6e-05	0.2251	2.8499	0.2513	2.4589	-0.104258	0.159014	0	0	-0.0409891	-0.0588235
Camta1	28.0579	632.772	7.1523	1.62e-23	28.4015	2022.65	16.1997	1.14e-09	0.0113	26.8518	0.0426	0.008	27.9976	0.0139	-0.4972	0.0603	-1.6176	0	0	0	1.25e-10	0.3032	2.4184	0.2245	2.6002	0.350557	-0.0699177	0	0	-0.0409249	0.4125
Aurkaip1	29.6356	4244.84	105.42	0	31.7121	944.637	23.2519	0	0.0248	29.4171	0.007	0.0247	30.6675	0.0325	-0.0061	0.0601	2.217	0.0211	0	0	2.48e-05	0.7326	1.4148	0.7558	1.2681	-0.030696	0.115685	0	0	-0.0407728	0.00404858
Wdr1	27.0518	1166.75	36.0459	0	29.1983	489.437	17.4431	0	0.0309	26.4208	0.0227	0.0357	27.5418	0.0562	0.2091	0.0599	1.3069	0	9.47e-27	0	5.8e-15	0.8167	1.2873	0.9795	1.0334	-0.166207	0.245694	0	0	-0.0407018	-0.134454
Mrps14	27.3096	835.561	28.2213	0	28.1567	1288.63	41.4303	0	0.0338	26.4282	0.0316	0.0321	27.5425	0.0215	-0.0732	0.0596	-0.5566	0	0	0	4.46e-06	0.8923	1.2328	0.887	1.1268	0.0059752	0.0940717	0	0	-0.0404575	0.0529595
Mcfd2	28.3636	675.654	4.3154	1.33e-08	30.1104	489.759	3.5016	9.69e-09	0.0064	27.2003	0.0404	0.0072	28.3462	0.0579	0.1649	0.0595	0.5206	0	0	0	1.67e-05	0.1724	3.306	0.2018	2.6991	-0.145689	0.224853	0	0	-0.0404252	-0.111111
Arrb2	28.0257	319.536	5.9832	0	27.3291	1519.2	31.0197	0	0.0187	25.7485	0.0806	0.0204	26.8328	0.0178	0.1234	0.0595	-2.1827	0	0	0	7.04e-05	0.4816	1.8434	0.5478	1.6149	-0.120847	0.141495	0	0	-0.0404095	-0.0833333
Atpif1	29.6563	1135.77	39.008	0	31.034	1028.07	33.9554	0	0.0344	28.8893	0.0255	0.0331	30.1036	0.0293	-0.055	0.0594	0.2026	0	0	0	0.000338	0.9926	1.1567	0.9914	1.0767	0.00121041	0.0743011	0	0	-0.0403374	0.0392749
Ptgr1	26.4125	553.91	5.3535	1.64e-20	27.0694	881.048	13.8882	0	0.0097	25.2029	0.0456	0.0158	26.2499	0.0299	0.6971	0.0587	-0.611	0	0	0	6.74e-16	0.2437	2.7503	0.4129	1.8919	-0.409784	0.453724	0	0	-0.0398859	-0.386076
Luc7l2	27.9471	1238.81	24.0803	0	29.0979	1291.93	28.4504	0	0.0194	27.3111	0.0221	0.022	28.4371	0.0221	0.1777	0.0583	0.0019	0	1.14e-14	1.11e-05	7.3e-09	0.5283	1.7242	0.6239	1.4217	-0.15323	0.212773	0	0	-0.0395962	-0.118182
Hmha1	28.7164	865.315	13.6768	0	29.2453	2724.99	51.0788	0	0.0158	27.7767	0.0323	0.0188	28.9202	0.0106	0.2475	0.0582	-1.606	0	0	0	1.76e-08	0.4382	1.9155	0.5429	1.5702	-0.192853	0.219908	0	0	-0.0395398	-0.159574
Ndufb8	29.496	1127.16	54.367	0	31.6629	551.948	23.3346	0	0.0483	28.7331	0.0255	0.0423	29.9152	0.0542	-0.1895	0.0582	1.0885	0	2.66e-13	0	8.24e-20	1.3861	0.8736	1.2568	0.8503	0.10288	0.0274021	0	0	-0.039515	0.141844
Psmd9	30.3157	836.126	6.9199	1.55e-16	30.981	1693.34	15.6928	1.66e-13	0.0083	29.2212	0.0348	0.0093	30.4154	0.018	0.1566	0.0578	-0.956	0	3.6e-17	0	3.6e-05	0.2391	2.7248	0.2821	2.2725	-0.152428	0.199032	0	0	-0.039263	-0.107527
Stom	29.079	2440.81	11.9123	6.5e-08	31.1455	746.895	5.4945	7.68e-11	0.0049	28.711	0.0118	0.0074	29.8842	0.0401	0.5926	0.0578	1.7656	0	0	0	1.2e-06	0.1396	3.5989	0.2195	2.6157	-0.364009	0.375884	0	0	-0.0392582	-0.337838
Usp5	28.8676	149.651	2.3488	0	26.5128	489.419	7.9357	0	0.0157	24.1432	0.1619	0.0162	25.1296	0.0514	0.0493	0.0578	-1.6565	1.45e-21	1.07e-09	0	0.000117	0.3759	2.1176	0.4057	1.8782	-0.0734533	0.127462	0	0	-0.0392525	-0.0308642
Snrpa1	28.2559	1239.99	16.8529	0	29.3595	1415.22	20.4802	0	0.0136	27.623	0.0223	0.0145	28.7506	0.0204	0.0901	0.0577	-0.1284	0	0	0	6.87e-05	0.3761	2.1016	0.415	1.8355	-0.0937349	0.144974	0	0	-0.0392201	-0.062069
Atraid	28.5755	1037.79	10.9491	5.41e-27	29.1843	3473.61	42.9672	0	0.0106	27.7963	0.0268	0.0123	28.9292	0.0084	0.2242	0.0576	-1.6723	0	7.12e-26	0	6.91e-06	0.2924	2.5189	0.3579	2.0645	-0.183012	0.220102	0	0	-0.0391611	-0.138211
Lrrfip1	28.4648	620.855	6.0594	3.72e-18	28.6373	2388.94	35.9629	0	0.0098	27.1862	0.0436	0.015	28.2885	0.0119	0.6153	0.0573	-1.8735	0	1.83e-24	0	2.53e-14	0.2627	2.5587	0.4261	1.8415	-0.383478	0.389465	0	0	-0.0389664	-0.346667
2009-09-01	28.9029	1878.88	21.3086	7.85e-25	30.1812	1599.04	23.1436	0	0.0114	28.4522	0.0151	0.0145	29.6001	0.0185	0.3532	0.0571	0.289	0	6.63e-22	0	1.67e-08	0.323	2.304	0.4263	1.8136	-0.242318	0.270401	0	0	-0.0387803	-0.213793
Gm10020	27.4839	1073.86	15.1094	9.27e-24	29.8649	418.92	5.1926	3.86e-19	0.0141	26.7823	0.025	0.0124	27.8602	0.0665	-0.1808	0.0569	1.4121	0	1.49e-25	0	8.53e-06	0.3766	2.034	0.343	1.9632	0.0979592	0.0360636	0	0	-0.0386896	0.137097
Dkc1	27.9048	1744.26	10.7749	3.35e-08	28.8752	2694.22	16.114	5.79e-06	0.0062	27.4503	0.0157	0.006	28.5545	0.0107	-0.0537	0.0569	-0.553	3e-12	1.26e-18	0	3.85e-06	0.1695	3.2111	0.171	2.8915	-0.00877193	0.110531	0	0	-0.0386699	0.0333333
Trappc5	29.9617	1250.76	8.9964	1.64e-15	31.2404	1184.73	10.1897	4.92e-16	0.0072	29.2422	0.0234	0.0086	30.4154	0.0258	0.2534	0.0568	0.1427	0	0	0	2.8e-05	0.209	2.9243	0.2608	2.4437	-0.19862	0.196669	0	0	-0.0385726	-0.162791
Gna13	29.1879	679.989	8.2798	2.31e-27	29.8832	1117.27	11.1441	6.81e-20	0.0122	27.9615	0.0412	0.01	29.0795	0.0261	-0.2903	0.0566	-0.6566	0	7.1e-27	0	3.16e-07	0.3394	2.2847	0.2885	2.2916	0.17643	-0.003011	0	0	-0.0384463	0.22
Nubp1	27.3838	2030	23.017	1.78e-19	29.5167	597.257	6.828	1.74e-26	0.0113	27.0081	0.0134	0.0114	28.0856	0.0472	0.015	0.0564	1.816	1.24e-13	0	0	0.000105	0.3063	2.359	0.3184	2.1322	-0.0380025	0.106369	0	0	-0.0383649	-0.00877193
Vta1	27.8806	438.229	4.1753	4.8e-20	27.533	2654.2	27.927	9.99e-16	0.0095	26.1961	0.0598	0.0105	27.2407	0.0103	0.1407	0.0564	-2.5398	0	0	0	4.57e-05	0.2489	2.6839	0.2877	2.3013	-0.134863	0.166254	0	0	-0.038347	-0.0952381
Psmd13	28.3613	370.712	6.3034	0	27.7977	1833.87	35.4719	0	0.017	26.3211	0.0711	0.0193	27.3689	0.015	0.1858	0.0563	-2.2488	0	0	0	1.37e-07	0.4452	1.9013	0.5308	1.5685	-0.161266	0.212177	0	0	-0.0382843	-0.119171
Nrg4	27.1082	392.552	4.917	5.72e-25	27.2447	817.622	12.1564	0	0.0125	25.3443	0.0647	0.0149	26.3496	0.0322	0.2504	0.0561	-1.0051	0	1.28e-18	0	2.34e-07	0.3158	2.3611	0.3911	1.8895	-0.192534	0.24959	0	0	-0.0381524	-0.161074
Pstpip1	27.2176	403.794	2.8725	9.95e-10	28.0962	467.032	4.9082	6.27e-19	0.0071	25.479	0.0632	0.0105	26.4887	0.0567	0.5645	0.0561	-0.1552	0	1.38e-17	0	9.6e-08	0.18	3.1618	0.2781	2.323	-0.352751	0.361085	0	0	-0.0381181	-0.32381
Timm50	27.5787	615.285	6.5477	1.45e-19	28.1742	1042.37	9.6629	3.25e-16	0.0106	26.3863	0.043	0.0093	27.426	0.0263	-0.1986	0.0558	-0.7065	0	0	0	2.3e-06	0.2799	2.4433	0.2543	2.3725	0.100669	0.0298419	0	0	-0.0379093	0.139785
Ndufa8	30.9592	603.236	15.6866	0	31.3102	1347.73	36.7429	0	0.0261	29.4183	0.0487	0.0274	30.5739	0.0226	0.071	0.0556	-1.1065	8.15e-12	1.2e-15	0	7.64e-08	0.7598	1.374	0.8276	1.1797	-0.0819236	0.164703	0	0	-0.0377969	-0.0474453
Spop	29.6099	551.251	8.9967	0	29.8152	1434.14	22.0634	0	0.0163	28.0819	0.0509	0.0155	29.1771	0.0203	-0.0767	0.0552	-1.3289	8.44e-22	2.07e-18	0	9.49e-05	0.4569	1.8933	0.4462	1.7587	0.0239803	0.0765338	0	0	-0.0375363	0.0516129
Hspa14	29.4736	3790.98	28.0358	1.63e-13	30.6438	3637.61	27.5227	9.54e-10	0.0074	29.2318	0.0078	0.0076	30.3683	0.0084	0.0356	0.055	0.1047	3.24e-06	2.69e-26	6.81e-25	2.37e-05	0.2174	2.8113	0.2297	2.5176	-0.0535481	0.116659	0	0	-0.0374239	-0.0263158
Atp5c1	27.8741	716.438	38.3757	0	28.6649	1013.86	45.0413	0	0.0535	26.8112	0.0375	0.0444	27.8535	0.0276	-0.2688	0.055	-0.4453	0	7.26e-24	0	4.07e-25	1.43	0.8555	1.2332	0.8766	0.159585	-0.0240703	0	0	-0.0374208	0.204955
Fxyd5	31.2207	1654.14	69.1828	0	32.3046	2125.62	90.503	0	0.0418	30.6232	0.0185	0.0427	31.8022	0.015	0.0277	0.0545	-0.309	4.1e-07	3.34e-14	0	3.35e-08	1.2778	0.982	1.3534	0.8509	-0.0558593	0.154072	0	0	-0.0370729	-0.0210773
Gadd45b	28.4236	2407.11	16.4402	2.78e-18	29.9445	1138.49	10.5646	1.65e-19	0.0068	28.0768	0.0117	0.0093	29.1555	0.0256	0.4442	0.0544	1.1299	0	2.8e-14	0	1.29e-06	0.1914	3.2158	0.2691	2.4309	-0.28874	0.322885	0	0	-0.0369982	-0.268817
Mcl1	28.3539	1194.36	10.729	5.25e-24	29.5753	1050.55	10.6927	2.31e-21	0.009	27.6832	0.0232	0.0102	28.7447	0.0275	0.175	0.0543	0.2457	0	1.95e-12	0	4.79e-05	0.2483	2.759	0.2912	2.3808	-0.147321	0.158854	0	0	-0.0369285	-0.117647
Jtb	28.8602	956.915	10.7294	0	29.8793	1101.18	12.4941	2.86e-20	0.0112	28.0026	0.0292	0.0114	29.0724	0.0264	0.0193	0.0541	-0.149	0.000324	2.99e-12	0	9.21e-05	0.3132	2.4128	0.329	2.1175	-0.0480243	0.139457	0	0	-0.0367978	-0.0175439
Pld4	25.9434	304.735	4.8191	0	25.5807	814.11	15.2475	0	0.0158	23.8791	0.0788	0.0187	24.7905	0.0305	0.2476	0.054	-1.3699	0	5.69e-17	0	1.35e-05	0.3762	2.391	0.4651	2.0002	-0.191142	0.19538	0	0	-0.0367641	-0.15508
Zcchc17	29.617	1403.57	11.069	1.71e-14	31.0374	986.016	9.2304	1.28e-14	0.0079	28.9731	0.0207	0.0094	30.0726	0.0306	0.2491	0.0537	0.5672	0	0	0	1.69e-05	0.2255	2.7943	0.2818	2.28	-0.199787	0.22557	0	0	-0.0365615	-0.159574
Psmd12	27.971	1539.54	20.3881	8.04e-27	28.8499	2376.92	32.6048	1.62e-24	0.0132	27.4578	0.018	0.0137	28.49	0.012	0.0547	0.0532	-0.5886	1.61e-14	0	0	0.000169	0.3635	2.1278	0.3917	1.8838	-0.0719939	0.129525	0	0	-0.0362303	-0.0364964
Prpf19	30.9244	2156.21	15.5986	8.14e-15	31.9564	3054.79	25.0776	2.79e-10	0.0072	30.4691	0.0141	0.0082	31.6094	0.0104	0.1804	0.053	-0.4458	0	3.22e-17	0	3.47e-05	0.2208	2.8009	0.2597	2.3507	-0.149788	0.191517	0	0	-0.0360747	-0.121951
Uqcc3	28.0364	1908.16	20.2919	0	29.4557	1077.48	13.6583	1.64e-23	0.0106	27.6199	0.0145	0.0127	28.6522	0.0266	0.258	0.0529	0.8723	0	1.09e-08	0	4.82e-06	0.2935	2.4781	0.3612	2.0278	-0.187431	0.222063	0	0	-0.0360286	-0.165354
Lsm6	28.9271	2070.09	43.0616	0	30.6223	871.559	16.9955	0	0.0208	28.506	0.0138	0.0195	29.571	0.034	-0.093	0.0529	1.3006	4.85e-26	5.6e-11	0	0.000123	0.5914	1.595	0.5758	1.5025	0.0270927	0.0615641	0	0	-0.036015	0.0666667
Mvb12a	30.3375	725.557	5.4525	1.84e-16	31.5713	694.165	4.7853	8.97e-11	0.0076	29.1	0.04	0.0069	30.1859	0.0435	-0.1367	0.0529	0.1186	0	1.33e-25	0	4.77e-06	0.2186	2.9338	0.2081	2.696	0.0504565	0.0882047	0	0	-0.0359737	0.101449
Ppp1r35	27.608	1223.26	14.7109	4.24e-23	28.7728	1044.47	12.8361	4.84e-23	0.012	26.9769	0.0221	0.0123	27.9809	0.0268	0.0357	0.0527	0.274	4.15e-06	4.26e-11	0	0.000133	0.3226	2.3364	0.3439	2.0944	-0.0619366	0.115546	0	0	-0.0358816	-0.0243902
Gm10269	27.1267	1083.88	9.1167	3.69e-11	28.0616	1253.67	9.311	1.16e-09	0.0084	26.4495	0.0245	0.0074	27.4307	0.022	-0.1799	0.0526	-0.1558	0	3.45e-14	0	8.78e-07	0.2221	2.7579	0.2036	2.6598	0.0908644	0.0368825	0	0	-0.0357701	0.135135
Eif1ax	24.951	519.851	9.0569	0	27.6619	230.348	3.9359	0	0.0174	23.7936	0.046	0.0171	24.6663	0.1071	-0.0248	0.052	1.2179	1.9e-05	2.11e-13	0	0.000298	0.4139	1.9816	0.4198	1.8234	-0.0140543	0.086761	0	0	-0.0353803	0.0175439
Lcn2	22.887	949.795	86.1511	0	24.7572	354.21	41.3652	0	0.0903	22.3274	0.0238	0.1169	23.1335	0.0653	0.3729	0.0512	1.4563	0	0	0	0	2.0113	0.8511	2.701	0.6658	-0.25535	0.278312	0	0	-0.0348456	-0.227545
Ifi35	29.8795	1583.01	10.4685	2.86e-11	30.4783	8289.93	52.1307	2.49e-09	0.0066	29.3048	0.0187	0.0063	30.3539	0.0037	-0.0748	0.0507	-2.3324	1.64e-16	4.88e-17	0	1.38e-06	0.1931	3.0883	0.1914	2.927	0.00888192	0.0551076	0	0	-0.0345623	0.047619
Ppm1g	29.3854	1611.24	9.2253	4.45e-07	31.4197	616.794	4.5543	5.88e-12	0.0057	28.8372	0.0179	0.0074	29.8691	0.0484	0.3766	0.0507	1.4313	0	4.07e-10	0	8.67e-06	0.1643	3.2556	0.2192	2.5573	-0.250456	0.273061	0	0	-0.0345474	-0.22973
Rap1a	26.9571	737.699	20.9228	0	28.9199	393.019	12.994	0	0.0284	25.9894	0.0352	0.033	26.9112	0.0688	0.2153	0.0503	0.9665	0	0	0	6.87e-14	0.7361	1.3943	0.8867	1.1268	-0.169843	0.237398	0	0	-0.0342534	-0.139394
Lta4h	28.7941	747.391	27.0039	0	29.4382	1148.61	42.8953	0	0.0361	27.7041	0.0371	0.0375	28.6815	0.0249	0.0545	0.05	-0.5749	7.6e-14	8.35e-14	0	2.72e-05	0.9968	1.1622	1.0676	1.0284	-0.066317	0.130105	0	0	-0.0340777	-0.0373333
Mcm5	31.7407	757.442	5.2684	1.11e-15	32.1481	1667.52	11.7017	8.44e-11	0.007	30.4536	0.0402	0.007	31.5232	0.0189	0.0145	0.0498	-1.0898	7.67e-06	0	0	1.86e-05	0.2117	2.8325	0.2209	2.5388	-0.0416478	0.115685	0	0	-0.0339306	0
Smarcd2	32.0852	920.202	6.1921	8.65e-13	32.7146	1675.02	11.6843	3.33e-10	0.0067	30.9859	0.0337	0.007	32.0737	0.0192	0.0505	0.0498	-0.8105	2.11e-15	4.14e-23	0	2.42e-05	0.2079	2.9132	0.2238	2.5541	-0.0710456	0.140597	0	0	-0.0339156	-0.0428571
Dda1	29.0263	1132.64	11.92	3.05e-24	30.0673	1146.75	12.8955	6.18e-20	0.0105	28.2931	0.0251	0.0112	29.2824	0.0256	0.0951	0.0496	0.0304	0	0	2.7e-09	7.5e-05	0.2985	2.4041	0.3284	2.0913	-0.0910475	0.149572	0	0	-0.0337848	-0.0625
Prkcd	26.4951	2060.98	22.6005	3.44e-21	27.9638	850.089	12.883	0	0.011	26.1444	0.0127	0.0152	27.0572	0.0318	0.4762	0.0495	1.3189	0	1.56e-21	0	3.71e-10	0.2865	2.4673	0.4074	1.875	-0.29676	0.315893	0	0	-0.0337359	-0.276316
Csrp1	28.801	1178.12	12.4953	1.59e-20	29.5588	1863.68	19.2028	1.86e-18	0.0106	28.0974	0.0239	0.0103	29.0776	0.0156	-0.0345	0.0495	-0.6205	3.2e-18	2.07e-21	0	4.88e-05	0.2971	2.3555	0.2982	2.1907	-0.0036888	0.0752271	0	0	-0.0337098	0.0291262
Ptpn1	27.9472	860.549	6.1833	8.38e-15	28.771	1038.3	12.2318	4.67e-24	0.0072	27.0479	0.0316	0.0118	27.9902	0.027	0.7165	0.0494	-0.2304	0	0	0	3.38e-10	0.194	3.1795	0.3304	2.2259	-0.412833	0.428411	0	0	-0.0336654	-0.389831
Zc3h15	30.2845	577.525	4.4145	4.42e-14	30.8854	797.33	6.0598	3.96e-12	0.0076	28.7453	0.0498	0.0076	29.7188	0.0373	-0.0075	0.0481	-0.4176	0.000649	3.06e-11	0	1.71e-05	0.2177	2.8713	0.2253	2.5592	-0.0337328	0.121952	0	0	-0.032757	0
Ak2	26.4534	522.276	16.8269	0	27.1846	611.206	18.9659	0	0.0323	25.1591	0.0482	0.0311	26.003	0.0425	-0.0516	0.0476	-0.1809	2.02e-08	4.99e-07	0	5.55e-06	0.8077	1.3107	0.8032	1.2007	0.00560259	0.0916132	0	0	-0.0324539	0.0385852
Tm2d3	29.611	1015.38	8.546	3.89e-13	30.2232	1843.04	15.4025	8.56e-14	0.0084	28.7566	0.0284	0.0084	29.7161	0.0161	-0.0055	0.0474	-0.8172	3.02e-10	2.29e-19	0	2.53e-05	0.2412	2.7349	0.2474	2.4734	-0.0250606	0.105725	0	0	-0.0322889	0
Hoxa9	26.944	1495.89	20.5784	0	27.6642	2356.47	48.8462	0	0.0137	26.4511	0.0177	0.0206	27.3258	0.0117	0.5868	0.0469	-0.6003	0	1.46e-14	0	3.3e-22	0.3622	2.177	0.5632	1.5416	-0.356889	0.412169	0	0	-0.03201	-0.334951
Bckdk	27.3332	1766.96	18.3265	3.52e-24	28.2892	1614.08	17.5402	2.57e-16	0.0103	26.9019	0.0153	0.0109	27.7888	0.0172	0.0701	0.0468	0.1705	0	9.19e-27	0	9.65e-05	0.2788	2.455	0.302	2.1547	-0.0768212	0.13937	0	0	-0.0319157	-0.0550459
Snw1	28.8905	543.083	5.4451	3.55e-18	28.7676	1731.28	19.3627	1.93e-23	0.01	27.3868	0.0507	0.0112	28.2873	0.0163	0.1627	0.0467	-1.6336	0	3.48e-11	0	4.62e-05	0.2715	2.5445	0.3165	2.1689	-0.14218	0.173175	0	0	-0.0318341	-0.107143
Rpl30	31.7182	841.934	30.2909	0	32.4395	1156.03	47.6499	0	0.036	30.526	0.0363	0.0413	31.5284	0.0273	0.1977	0.0466	-0.413	0	4.76e-10	0	2.81e-16	1.0841	1.0795	1.2905	0.86	-0.159938	0.255233	0	0	-0.0317936	-0.128329
Itgb2l	29.2404	3118.51	15.8031	2.5e-10	30.7493	1120.73	12.9236	0	0.0051	28.9584	0.0093	0.0115	29.9062	0.0267	1.1867	0.0465	1.5217	0	1.72e-12	0	2.4e-15	0.1468	3.5725	0.3429	2.2023	-0.571887	0.622168	0	0	-0.0316924	-0.556522
Btf3	36.5066	1948.51	117.316	0	37.4235	3260.16	184.195	0	0.0605	35.8089	0.0183	0.0564	36.9786	0.0114	-0.1005	0.0464	-0.6873	0	5.46e-17	0	2.95e-08	2.1506	0.5647	2.0894	0.5341	0.0292907	0.0572926	0	0	-0.0316318	0.072695
Agpat2	26.8981	764.153	11.4689	2.58e-27	28.2502	535.247	8.7243	0	0.015	25.97	0.0341	0.0163	26.818	0.0501	0.1195	0.0464	0.5551	0	0	0	0.000132	0.3895	2.1059	0.4351	1.8434	-0.104803	0.1424	0	0	-0.0316206	-0.0797546
Sqrdl	27.547	1215.58	10.7929	1.19e-18	28.1593	2192.97	30.5175	0	0.0089	26.9162	0.0222	0.0139	27.7939	0.0127	0.6487	0.0463	-0.8063	0	0	0	1.23e-13	0.2376	2.803	0.389	1.9508	-0.389203	0.436846	0	0	-0.0315789	-0.359712
Pycard	25.0293	447.591	11.0501	0	26.0938	395.661	12.9732	0	0.0247	23.6918	0.053	0.0329	24.4612	0.0618	0.4124	0.0461	0.2222	0	3.35e-13	0	4.35e-24	0.5841	1.6898	0.8016	1.2662	-0.271332	0.334544	0	0	-0.0314539	-0.24924
Itfg1	28.6264	514.678	6.0063	9.65e-26	28.426	1854.51	18.5084	3.78e-16	0.0117	27.1046	0.0528	0.01	27.9847	0.0151	-0.2221	0.0461	-1.8056	0	0	0	1.53e-06	0.3151	2.3102	0.2805	2.2709	0.123351	0.0173059	0	0	-0.0314493	0.17
Vars	29.0246	622.689	4.2218	4.77e-08	28.9588	2491.06	16.0343	4.56e-08	0.0068	27.7107	0.0445	0.0064	28.6095	0.0115	-0.0746	0.0461	-1.9537	5.87e-13	1.06e-08	0	3.18e-06	0.187	3.0601	0.1843	2.8095	0.01465	0.0891974	0	0	-0.0314161	0.0625
Hgsnat	27.0244	674.262	4.7425	2.76e-11	30.0325	250.294	2.5579	1.66e-15	0.007	25.9648	0.0388	0.0103	26.7994	0.1071	0.5568	0.0456	1.4649	0	0	0	6.43e-07	0.1819	3.1967	0.2742	2.3895	-0.336616	0.337811	0	0	-0.0311425	-0.320388
Esd	26.8663	373.027	10.4077	0	28.4902	279.545	8.8034	0	0.0279	25.0517	0.0672	0.0315	25.8335	0.0927	0.1741	0.0443	0.464	0	0	0	5.07e-11	0.699	1.4663	0.8122	1.2095	-0.139375	0.212319	0	0	-0.030263	-0.114286
Svip	26.666	1449.41	10.8876	1.68e-12	28.4735	519.949	6.4737	1.13e-19	0.0075	26.1709	0.0181	0.0125	26.9826	0.0519	0.7335	0.0441	1.5215	0	1.74e-23	0	1e-13	0.1969	2.9994	0.3356	2.0244	-0.41329	0.481624	0	0	-0.0300823	-0.4
Dnajb11	28.9433	1244.77	20.2275	0	29.4711	2733.46	42.7626	0	0.0163	28.2685	0.0227	0.0156	29.1397	0.0107	-0.0628	0.0438	-1.0829	1.64e-14	1.63e-10	0	8.84e-05	0.4587	1.8731	0.4538	1.7159	0.0107977	0.0916137	0	0	-0.0298974	0.0448718
Lmnb1	29.8899	776.051	10.3151	0	30.3816	1252.9	18.7746	0	0.0133	28.7566	0.037	0.015	29.6428	0.0238	0.1669	0.0438	-0.6377	0	2.25e-17	0	5.07e-05	0.3797	2.062	0.4439	1.7822	-0.144627	0.156997	0	0	-0.029896	-0.113333
Rab4b	30.1642	1486.4	11.406	2.84e-13	30.7772	3023.17	15.7702	1.97e-09	0.0077	29.5437	0.0199	0.0052	30.4535	0.0101	-0.5567	0.0438	-0.9791	0	7.33e-15	0	8.95e-13	0.226	2.7421	0.1598	3.1306	0.414268	-0.124098	0	0	-0.0298751	0.480769
Atp11b	27.5436	504.376	5.3375	2.45e-23	27.6307	1016.84	18.3106	0	0.0106	26.0969	0.0519	0.018	26.8918	0.0265	0.768	0.0433	-0.97	0	2.92e-11	0	3.1e-23	0.2745	2.5637	0.4845	1.7172	-0.433437	0.492954	0	0	-0.0295592	-0.411111
Higd2a	28.0303	1250.03	29.6972	0	28.6722	1890.01	46.9751	0	0.0237	27.3974	0.022	0.0249	28.2285	0.0149	0.0661	0.0431	-0.5551	4.33e-20	1.36e-10	0	2.57e-06	0.6493	1.5499	0.7008	1.3535	-0.0734874	0.145105	0	0	-0.0294419	-0.0481928
Rpl22l1	28.0867	524.456	7.4479	0	28.0475	1301.84	26.0513	0	0.0142	26.6276	0.051	0.0199	27.4293	0.0214	0.4913	0.0428	-1.2525	0	2.76e-16	0	1.04e-15	0.3753	2.1531	0.5456	1.6076	-0.312133	0.339326	0	0	-0.0292279	-0.286432
Adgrg3	30.7833	1197.21	13.8101	1.58e-26	31.2544	2929.58	34.3618	0	0.0115	29.9977	0.0251	0.0117	30.9005	0.0106	0.0188	0.0428	-1.2376	1.87e-07	1.92e-25	0	6.95e-05	0.3457	2.199	0.3609	1.9429	-0.0421169	0.131813	0	0	-0.0292164	-0.017094
Itgam	25.8583	507.034	4.1651	1.07e-14	27.4616	331.148	3.4625	1.56e-19	0.0082	24.5954	0.0485	0.0104	25.3336	0.077	0.3435	0.0427	0.6665	0	1.45e-15	0	2.21e-05	0.2023	3.0258	0.2641	2.4975	-0.234002	0.211532	0	0	-0.0291392	-0.211538
Rpl9-ps6	32.3042	2076.84	117.521	0	33.7896	1064.66	56.9118	0	0.0567	31.785	0.0153	0.0535	32.7365	0.0308	-0.0838	0.0426	1.008	4.59e-27	1.14e-15	0	4.93e-07	1.7946	0.6557	1.7494	0.6236	0.0258374	0.0514753	0	0	-0.0290654	0.0598131
F13a1	25.428	402.718	4.51	0	25.1306	1236.18	21.4297	0	0.0112	23.8988	0.0598	0.0173	24.6141	0.02	0.6281	0.0425	-1.5792	0	5.84e-18	0	3.12e-10	0.2674	2.8222	0.4254	2.0775	-0.371415	0.35846	0	0	-0.0290606	-0.352601
Rp2	28.3258	2454.02	21.4327	2.43e-20	29.8335	858.148	7.1798	3.67e-13	0.0087	27.9844	0.0114	0.0084	28.8185	0.0336	-0.0612	0.0424	1.558	2.87e-12	2.38e-10	0	1.43e-05	0.2438	2.7004	0.2413	2.486	0.0103605	0.086243	0	0	-0.0289432	0.0357143
Glod4	28.7455	514.462	5.6395	1.58e-24	28.809	1043.83	12.0009	1.63e-18	0.011	27.209	0.0529	0.0115	28.0176	0.0268	0.0722	0.0422	-0.9794	0	9.44e-07	0	7.61e-05	0.2976	2.4123	0.3221	2.1055	-0.0760633	0.145714	0	0	-0.0288604	-0.0434783
Ola1	29.4659	965.077	8.6934	1.9e-18	29.6803	3767.82	34.7808	2.3e-16	0.009	28.5871	0.0296	0.0092	29.4347	0.0078	0.0347	0.0422	-1.9218	9.68e-07	0	0	5.83e-05	0.2571	2.613	0.2734	2.3023	-0.0596196	0.134952	0	0	-0.0287959	-0.0217391
Nipa2	31.2494	1583.47	14.1281	7.2e-20	32.0272	2063.73	18.9844	4.09e-16	0.0089	30.6169	0.0195	0.0092	31.5151	0.0153	0.0517	0.0417	-0.3506	8.82e-11	1.47e-11	0	6.54e-05	0.2707	2.5636	0.2883	2.239	-0.0610475	0.144975	0	0	-0.0285006	-0.0326087
Fbxo22	31.0081	1181.1	8.5472	5.58e-19	31.5158	2381.31	17.3107	7.51e-11	0.0072	30.2022	0.0256	0.0073	31.0829	0.0131	0.0054	0.0415	-0.9717	4.05e-06	1.03e-23	0	1.77e-05	0.2182	2.8525	0.2252	2.5542	-0.0310835	0.116788	0	0	-0.0283339	-0.0136986
Gspt1	30.7174	1020.89	5.8557	8.03e-09	31.3429	1454.16	12.7884	1.48e-13	0.0057	29.7973	0.0293	0.0088	30.6598	0.0211	0.6166	0.0412	-0.4693	0	9.26e-22	0	5.79e-08	0.1695	3.1327	0.2695	2.2867	-0.371058	0.369965	0	0	-0.0281313	-0.352273
Eno1b	29.0319	673.392	4.8559	1.46e-11	29.0555	2058.56	11.4694	1.19e-05	0.0072	27.8191	0.0413	0.0056	28.624	0.014	-0.3804	0.0411	-1.5632	0	1.52e-22	0	1.43e-09	0.2008	2.9022	0.1582	3.0467	0.269279	-0.0474284	0	0	-0.0281198	0.285714
Hibadh	28.4885	619.417	6.3412	9.96e-19	29.1739	709.597	7.0867	1.73e-18	0.0102	27.2142	0.044	0.01	27.998	0.0396	-0.0362	0.041	-0.1541	2.16e-11	3.15e-16	0	4.29e-05	0.277	2.4699	0.2792	2.2529	-0.00787966	0.0963203	0	0	-0.0279949	0.02
Rrp1	29.1642	1109.97	13.5252	0	29.791	1572.58	19.4695	8.83e-26	0.0122	28.4019	0.0256	0.0124	29.2154	0.0187	0.0204	0.0407	-0.4581	0.000194	6.11e-13	0	0.000108	0.3454	2.2047	0.3607	1.9646	-0.0424175	0.122213	0	0	-0.0278449	-0.016129
Rpa3	27.0641	711.558	10.4587	0	27.5208	1045.24	12.7372	5.24e-22	0.0147	26.0654	0.0368	0.0122	26.7993	0.0257	-0.2729	0.0401	-0.5166	0	5.74e-26	0	1.54e-07	0.3838	2.079	0.3257	2.1108	0.178385	-0.0150654	0	0	-0.027385	0.204918
Emd	30.668	1580.92	17.3136	0	31.6402	1346.75	16.3616	2.34e-23	0.011	30.0588	0.019	0.0121	30.9001	0.023	0.1473	0.0398	0.2745	0	2.04e-18	0	3.41e-05	0.3279	2.2575	0.3759	1.9288	-0.127694	0.170417	0	0	-0.0272264	-0.0909091
Psmc1	28.3045	444.498	6.6432	0	28.0495	1083.78	15.3026	1.8e-23	0.0149	26.5912	0.0599	0.0141	27.3304	0.0252	-0.0807	0.0396	-1.2476	0	8.12e-11	0	0.000115	0.3958	2.0446	0.3861	1.8964	0.025123	0.0781481	0	0	-0.0270468	0.0567376
Tapbp	27.0172	715.113	16.1539	0	27.8242	700.294	11.5669	0	0.0226	26.0132	0.0365	0.0165	26.7339	0.0383	-0.4508	0.0394	0.0687	0	1.9e-11	1.03e-13	1.08e-14	0.5848	1.631	0.4384	1.786	0.333942	-0.0867861	0	0	-0.0269583	0.369697
Ctsz	27.3601	681.431	25.4316	0	28.3712	574.829	22.4481	0	0.0373	26.2917	0.0387	0.0392	27.0201	0.047	0.0705	0.0394	0.2798	2.32e-24	3.55e-18	0	5.98e-07	0.9797	1.2037	1.0536	1.0444	-0.0701405	0.152528	0	0	-0.0269577	-0.0484694
Ndufa12	28.6885	521.795	13.4744	0	28.3092	1975.17	47.6915	0	0.0258	27.1586	0.0521	0.0241	27.9075	0.0141	-0.098	0.0392	-1.8812	0	0	0	4.81e-06	0.6942	1.4694	0.6767	1.3569	0.0258608	0.0829096	0	0	-0.0268351	0.0705394
Nfkb1	28.7274	868.757	12.2161	0	29.9112	633.326	7.551	2.51e-22	0.014	27.7837	0.0321	0.012	28.5491	0.045	-0.2307	0.0392	0.4908	0	3.02e-07	0	4.28e-06	0.3889	2.1764	0.3408	2.0997	0.141138	0.036529	0	0	-0.02681	0.166667
Rpl13a	48.2508	5759.15	341.778	0	49.8716	3447.13	212.576	0	0.0595	47.8106	0.0083	0.062	49.1271	0.0142	0.0595	0.0392	0.7781	3.75e-13	0.000357	0	1.95e-18	2.8283	0.3937	3.0272	0.3353	-0.0657043	0.174172	0	0	-0.0267978	-0.0403226
Apmap	28.7383	1014.36	9.9579	4.09e-19	30.1504	598.016	7.0992	1.22e-22	0.0098	27.9212	0.0276	0.0119	28.6851	0.048	0.2761	0.0389	0.7982	0	5.23e-10	0	5.5e-06	0.2721	2.5133	0.34	2.0481	-0.199706	0.227137	0	0	-0.0266306	-0.176471
Ube2d3	42.4854	3906.98	225.614	0	43.7242	3453.05	179.426	0	0.0579	42	0.0107	0.0521	43.1446	0.0125	-0.1525	0.0388	0.2171	0	2.67e-15	0	0	2.4235	0.4597	2.2359	0.4365	0.0839036	0.0531501	0	0	-0.0265294	0.111324
Prps1	29.1207	2959.2	21.5587	3.43e-11	30.2046	1490.34	11.1542	6.4e-11	0.0073	28.8201	0.0098	0.0075	29.587	0.0198	0.0428	0.0379	1.0193	1.33e-12	3.53e-16	0	2.22e-05	0.2101	2.8695	0.2217	2.5456	-0.052323	0.127239	0	0	-0.0259202	-0.0266667
Med8	29.2821	845.167	9.4735	2.13e-24	29.779	1188.86	13.7791	7.49e-24	0.0112	28.2797	0.0334	0.0116	29.0322	0.0246	0.0408	0.0379	-0.4405	1.65e-10	0	0	0.00013	0.3146	2.3326	0.3348	2.0893	-0.0603345	0.11645	0	0	-0.0259195	-0.0344828
Tmed9	29.6107	1692.66	77.7683	0	30.3718	1803.93	67.3284	0	0.0458	29.078	0.0173	0.0373	29.851	0.0166	-0.2972	0.0379	-0.0595	0	7.89e-07	2.08e-11	0	1.3273	0.9055	1.1106	0.9517	0.19512	-0.0485447	0	0	-0.0258953	0.227882
Txndc9	28.0979	1178.66	16.1883	4.09e-27	28.9951	980.581	17.6082	0	0.0138	27.4246	0.0232	0.0179	28.1508	0.0288	0.383	0.0377	0.3068	0	6.99e-19	0	1.26e-12	0.3745	2.1448	0.5056	1.6287	-0.259296	0.316878	0	0	-0.0257968	-0.22905
Glrx2	28.8094	1043.9	7.6193	2.33e-15	29.284	1656.4	13.079	5.92e-11	0.0073	28.0191	0.0268	0.0079	28.7549	0.0175	0.1052	0.0374	-0.6129	0	1.01e-06	0	2.07e-05	0.2042	3.0099	0.2256	2.634	-0.0948582	0.142711	0	0	-0.0255887	-0.0759494
Tbcb	29.4206	1133.22	20.5832	0	29.9803	1580.61	33.7455	0	0.0182	28.6576	0.0253	0.0215	29.3979	0.0186	0.2364	0.0368	-0.4444	0	2.42e-15	0	1.37e-08	0.5203	1.731	0.6237	1.4331	-0.165785	0.207871	0	0	-0.0251821	-0.153488
1700020I14Rik	28.1358	509.259	4.2947	3.12e-13	27.8363	1544.17	16.099	2.41e-15	0.0084	26.6474	0.0524	0.0104	27.3284	0.0177	0.3073	0.0364	-1.5657	0	4.86e-17	0	1.84e-05	0.2243	2.7988	0.2842	2.3077	-0.210767	0.212809	0	0	-0.0249191	-0.192308
Mdh1	28.598	928.412	26.01	0	28.9108	1718.98	47.9736	0	0.028	27.7231	0.03	0.0279	28.416	0.0166	-0.0039	0.0356	-0.8574	9.01e-05	6.61e-13	0	1.72e-05	0.7739	1.3688	0.7919	1.2251	-0.0227301	0.117297	0	0	-0.0243841	0.00358423
Cdk1	27.9974	1206.92	22.4295	0	28.5889	1386.74	19.4152	0	0.0185	27.3248	0.0228	0.014	27.994	0.0202	-0.4007	0.0349	-0.1773	0	4.61e-05	0	2.48e-12	0.5	1.842	0.3912	2.0344	0.278119	-0.0945733	0	0	-0.0239051	0.321429
Seh1l	27.9131	686.577	5.9969	5.16e-16	28.4139	828.703	8.4663	5.92e-14	0.0087	26.8055	0.0391	0.0102	27.4587	0.0331	0.2289	0.0347	-0.2404	0	1.49e-15	0	2.29e-05	0.2331	2.7068	0.2806	2.241	-0.16928	0.207854	0	0	-0.0237885	-0.147059
Rps6	49.1632	4587.85	321.567	0	52.0248	1182.84	83.5813	0	0.0703	48.6082	0.0106	0.0711	49.7899	0.042	0.0158	0.0347	1.9888	0.0134	3.59e-08	0	2.41e-06	3.4091	0.2898	3.5095	0.2584	-0.0286081	0.121517	0	0	-0.0237337	-0.0112518
Rpl19	46.3839	4187.45	230.532	0	47.5793	3748.27	228.803	0	0.0552	45.841	0.0109	0.0614	46.9477	0.0125	0.1551	0.0344	0.1915	0	2.68e-06	0	0	2.5179	0.4638	2.8652	0.3632	-0.121213	0.276982	0	0	-0.023573	-0.100977
Grk6	28.252	634.878	6.1366	2.4e-16	27.9731	2681.02	35.956	6.18e-27	0.0097	27.0287	0.0427	0.0134	27.6746	0.0103	0.4749	0.0341	-2.049	0	4.16e-13	0	1.28e-08	0.2607	2.6048	0.3722	1.9975	-0.29957	0.30403	0	0	-0.0233391	-0.276119
Phpt1	30.9267	1204.13	13.7326	1.36e-25	31.2447	2445.59	30.5881	1.66e-21	0.0114	30.118	0.0251	0.0125	30.836	0.0126	0.1354	0.034	-0.991	0	2.59e-20	0	6.35e-06	0.3409	2.1895	0.3863	1.8331	-0.117525	0.194425	0	0	-0.0232845	-0.088
Ube2i	28.974	832.121	32.2998	0	29.4676	1049.56	41.7935	0	0.0389	27.991	0.0336	0.0399	28.6472	0.0273	0.0388	0.0334	-0.3021	7.62e-10	3.23e-16	0	1.26e-06	1.0857	1.0638	1.1382	0.9318	-0.0461255	0.141661	0	0	-0.0229063	-0.0250627
Osm	26.9862	505.57	6.6595	0	27.1749	731.412	7.9696	7.8e-26	0.0132	25.6023	0.0508	0.0109	26.1929	0.0358	-0.2717	0.0329	-0.5041	0	4.06e-18	0	1.15e-08	0.3361	2.4305	0.2852	2.5443	0.178471	-0.0447274	0	0	-0.0225481	0.211009
Slc4a8	26.5661	716.87	9.2165	0	27.9243	427.58	8.462	0	0.0128	25.6063	0.0359	0.0198	26.1933	0.0613	0.625	0.0327	0.7697	0	0	0	2.88e-21	0.3299	2.4369	0.5178	1.678	-0.362881	0.452265	0	0	-0.0224103	-0.353535
Asf1a	28.2203	1197.69	13.5483	6.37e-27	28.6624	1718.68	16.7659	4.31e-16	0.0113	27.5512	0.0231	0.0098	28.1785	0.0164	-0.208	0.0325	-0.4955	0	2.97e-08	0	3.19e-06	0.3106	2.3738	0.2757	2.2868	0.126587	0.0380444	0	0	-0.0222617	0.153061
Lgals9	30.1035	567.22	6.6508	0	29.6325	2135.48	22.1905	6.35e-20	0.0118	28.5644	0.0503	0.0104	29.2145	0.0137	-0.1857	0.0325	-1.8777	0	6.43e-12	0	4.76e-06	0.3348	2.278	0.3034	2.217	0.103494	0.0275147	0	0	-0.0222526	0.134615
Hypk	26.0218	170.117	4.0555	0	24.578	377.442	8.0788	0	0.0239	22.5518	0.1326	0.0214	23.0585	0.0612	-0.1552	0.0321	-1.1153	0	9.77e-13	0	1.08e-05	0.5367	1.6706	0.4918	1.629	0.0912973	0.0255371	0	0	-0.0219745	0.116822
Sf3b5	29.552	2160.18	54.0621	0	30.2566	2009.02	48.548	0	0.025	29.1394	0.0136	0.0242	29.7896	0.0148	-0.0439	0.0318	0.1283	3.57e-17	1.07e-12	0	1.88e-05	0.7282	1.4259	0.7186	1.3129	0.0133593	0.086069	0	0	-0.0218264	0.0330579
Srd5a3	27.6106	763.805	5.208	1.2e-11	28.8721	484.288	5.2744	4.98e-21	0.0068	26.6266	0.035	0.0109	27.2146	0.0562	0.6787	0.0315	0.6842	0	8.68e-19	0	7.33e-09	0.1809	3.1601	0.2944	2.2677	-0.38553	0.393526	0	0	-0.021606	-0.376147
Parvg	30.1004	857.617	9.6434	3.43e-22	29.9898	3227.96	33.2349	3.88e-21	0.0112	29.0671	0.034	0.0103	29.6948	0.0092	-0.1273	0.0308	-1.8819	0	2.94e-14	0	1.59e-05	0.3264	2.2704	0.3067	2.149	0.0642321	0.0564914	0	0	-0.0211384	0.0873786
Git2	29.8503	698.107	4.9353	1.95e-17	31.5308	403.449	3.0583	5.79e-12	0.0071	28.6107	0.0409	0.0076	29.2238	0.0725	0.0956	0.0306	0.8241	0	3e-10	0	1.84e-05	0.2019	3.0524	0.2206	2.6762	-0.0847688	0.140572	0	0	-0.0209795	-0.0657895
Zfp414	29.3246	2380.51	17.0866	1.98e-14	30.1622	1556.38	13.0018	1.42e-15	0.0072	28.9447	0.0122	0.0083	29.5606	0.0192	0.21	0.0304	0.6585	0	1.55e-07	0	3.14e-05	0.207	2.9741	0.2443	2.5631	-0.152681	0.160353	0	0	-0.0208352	-0.13253
Pgk1	26.7535	1097.31	23.2557	0	27.4081	1006.79	22.061	0	0.0212	26.1097	0.0238	0.0218	26.6621	0.0267	0.0445	0.0302	0.1629	9.22e-15	6.19e-16	0	0.000128	0.5534	1.6087	0.5818	1.4473	-0.048814	0.111518	0	0	-0.0207185	-0.0275229
Slbp	28.0373	582.374	19.8327	0	28.8293	522.957	15.8616	0	0.034	26.7339	0.0461	0.0305	27.2987	0.0521	-0.1593	0.0302	0.1759	0	0	0	1.57e-07	0.9076	1.2485	0.8231	1.2354	0.102661	0.0106039	0	0	-0.0206896	0.114754
Cops4	30.2039	1375.02	15.0181	1.01e-25	30.8121	1438.33	14.5502	1.68e-16	0.0109	29.5336	0.0216	0.0101	30.1569	0.021	-0.1067	0.0301	-0.041	0	1.23e-06	2.07e-26	2.8e-05	0.3197	2.3166	0.3055	2.1443	0.0464812	0.0803526	0	0	-0.0206686	0.0792079
Tra2b	29.9811	994.577	19.0378	0	30.0997	2298.43	50.82	0	0.0192	29.0774	0.0292	0.0221	29.6851	0.0129	0.2017	0.0298	-1.1759	0	4.5e-05	0	5.65e-09	0.5543	1.6596	0.6538	1.3722	-0.152187	0.209445	0	0	-0.0204715	-0.131222
Slc9a3r1	26.0866	1055.14	18.4526	0	26.3937	1664.32	33.3237	0	0.0175	25.4463	0.0241	0.02	25.9701	0.0156	0.1943	0.0294	-0.6277	0	1.38e-09	0	8.94e-07	0.4439	1.9128	0.5211	1.6085	-0.148148	0.189182	0	0	-0.0201693	-0.125
Mospd3	29.0815	500.143	6.0212	0	28.6935	1260.36	13.1606	3.75e-15	0.0121	27.4707	0.0549	0.0104	28.0357	0.0223	-0.2099	0.0294	-1.2975	0	4.83e-12	0	6.29e-07	0.3306	2.253	0.2911	2.2535	0.135692	-0.000221877	0	0	-0.0201529	0.163462
Rabgap1l	29.3638	1033.76	5.8205	7.28e-08	30.022	1003.55	7.4889	8.25e-11	0.0056	28.5368	0.0276	0.0074	29.1185	0.0291	0.4026	0.0291	0.0765	0	1.08e-06	0	7.7e-06	0.1599	3.4437	0.2156	2.6608	-0.258349	0.294235	0	0	-0.019977	-0.243243
Rps12-ps3	31.5921	3143.73	55.9807	0	32.3091	2685.67	66.2174	0	0.0178	31.2682	0.01	0.0246	31.9049	0.0119	0.4689	0.0291	0.254	0	9.15e-27	0	1.52e-25	0.5601	1.6283	0.7854	1.2075	-0.28686	0.348489	0	0	-0.0199562	-0.276423
Zfp207	27.432	474.716	7.9256	0	27.6541	596.463	13.7314	0	0.0166	25.8992	0.055	0.023	26.4158	0.0443	0.4683	0.0285	-0.3101	0	8.42e-09	0	3.26e-19	0.4286	1.9342	0.6065	1.4372	-0.293322	0.345811	0	0	-0.0195565	-0.278261
Arrdc4	28.1549	703.499	9.1168	0	28.0916	1587.61	13.1679	8.26e-14	0.013	27.0546	0.0385	0.0083	27.5937	0.0174	-0.6429	0.0285	-1.1464	0	4.78e-20	0	4.95e-14	0.3498	2.3615	0.2293	2.6911	0.525512	-0.122478	0	0	-0.0195371	0.566265
Aurkb	27.7505	335.807	2.4917	1.27e-07	27.042	764.343	5.5285	1.08e-08	0.0074	25.5954	0.0765	0.0072	26.1038	0.0342	-0.0341	0.0284	-1.1613	8.18e-06	4.26e-10	0	1.87e-06	0.1885	2.9996	0.1882	2.8368	0.00159405	0.0573886	0	0	-0.0194761	0.0277778
Rnf5	31.1219	1723.19	13.2644	1.71e-15	31.6198	2189.83	17.5506	5.61e-15	0.0077	30.5574	0.0177	0.008	31.1542	0.0142	0.0582	0.0279	-0.3183	1.38e-16	2.84e-06	0	2.65e-05	0.2356	2.738	0.2501	2.4702	-0.0579768	0.108412	0	0	-0.0191563	-0.0375
Lockd	29.7137	728.324	4.5823	2.11e-10	29.6903	1480.88	10.5452	9.22e-11	0.0063	28.5299	0.0391	0.0071	29.0863	0.0197	0.1755	0.0279	-0.9931	0	1.53e-09	0	1.99e-05	0.1789	3.0794	0.2064	2.6633	-0.133236	0.156235	0	0	-0.0191293	-0.112676
Ptp4a1	28.2101	937.046	17.145	0	28.8879	829.907	18.5802	0	0.0183	27.3688	0.0292	0.0224	27.9002	0.0336	0.2912	0.0277	0.2029	0	0.000103	0	5.6e-12	0.5006	1.7874	0.6238	1.4291	-0.197499	0.250717	0	0	-0.0190465	-0.183036
App	29.2746	429.666	5.9184	0	28.1975	2902.6	47.0855	0	0.0138	27.3793	0.0637	0.0162	27.9098	0.0097	0.2324	0.0277	-2.7233	0	7.81e-05	0	2.89e-06	0.3753	2.0894	0.4533	1.7514	-0.172071	0.192988	0	0	-0.0190077	-0.148148
Rps19bp1	29.2326	529.854	3.7083	2.57e-14	28.7722	1511.21	10.3367	4.81e-10	0.007	27.6789	0.0525	0.0068	28.2125	0.0189	-0.0344	0.0275	-1.4722	7.94e-14	1.87e-20	0	4.51e-06	0.1926	3.0489	0.1922	2.7951	0.00208117	0.0908018	0	0	-0.0189136	0.0294118
Gnb2	32.9487	1616.88	81.3811	0	34.0451	975.387	51.2876	0	0.0502	32.2624	0.02	0.0527	32.8837	0.0337	0.069	0.0275	0.7499	2.57e-25	8.62e-12	0	3.3e-08	1.6147	0.741	1.7296	0.6074	-0.0664315	0.219954	0	0	-0.0188939	-0.0474383
Atp5k	28.4945	524.488	8.1922	0	28.7483	633.795	10.3311	0	0.0156	26.9743	0.0515	0.0163	27.4901	0.0434	0.0624	0.0273	-0.2473	0	2.07e-19	0	0.000122	0.4144	1.9369	0.4481	1.7086	-0.0752064	0.133618	0	0	-0.0187631	-0.0429448
Hnrnpll	26.8047	1416.69	12.6948	1.39e-13	27.6681	857.567	10.4861	6.25e-24	0.0089	26.2937	0.0187	0.0122	26.7838	0.0313	0.4502	0.0266	0.7448	0	4.1e-10	0	9.04e-08	0.2353	2.6959	0.3261	2.0761	-0.278442	0.298541	0	0	-0.0182984	-0.270492
Smad2	29.4631	591.982	4.2269	1.01e-11	29.8489	661.983	4.8468	4.87e-12	0.0071	28.0246	0.0476	0.0073	28.5452	0.0431	0.0418	0.0266	-0.1424	1.8e-09	1.1e-06	0	1.25e-05	0.1983	3.029	0.2082	2.6806	-0.0475504	0.129971	0	0	-0.0182377	-0.0273973
Rpf2	27.1487	840.776	7.6892	4.12e-18	27.5675	929.142	6.9	3.15e-09	0.0091	26.2792	0.0314	0.0074	26.7589	0.0289	-0.3003	0.0261	-0.1201	0	1.48e-25	1.18e-18	6.39e-08	0.2399	2.7427	0.1986	2.7582	0.207956	-0.00561961	0	0	-0.0179267	0.22973
Txnl1	27.7451	440.104	8.1454	0	27.0037	1562.45	30.0351	0	0.0185	26.0734	0.0595	0.0192	26.5357	0.0171	0.0558	0.0254	-1.7968	0	1.73e-09	0	1.57e-05	0.4808	1.8157	0.5111	1.5896	-0.0592839	0.142237	0	0	-0.0174218	-0.0364583
Vma21	26.6614	735.464	6.9602	4.54e-19	27.3812	603.269	7.0663	7.34e-20	0.0095	25.7201	0.0351	0.0117	26.1699	0.0434	0.3114	0.025	0.3066	0	6.09e-18	0	9.47e-06	0.243	2.649	0.3045	2.1633	-0.20197	0.224518	0	0	-0.0171877	-0.188034
Ly6c2	26.4709	678.056	42.5051	0	27.1251	583.702	39.5646	0	0.0627	25.464	0.0376	0.0678	25.906	0.0444	0.113	0.0248	0.2404	0	1.26e-11	0	5.38e-06	1.5931	0.8678	1.7514	0.7771	-0.0903848	0.116716	0	0	-0.0170617	-0.0752212
Gar1	28.7606	1197.54	11.9918	2.63e-23	29.3431	1094.97	10.5901	3.68e-16	0.01	28.0735	0.0235	0.0097	28.5599	0.0261	-0.0484	0.0248	0.149	6.04e-21	2.06e-10	0	3.26e-05	0.2811	2.459	0.2757	2.2545	0.0195865	0.0907075	0	0	-0.0170309	0.0309278
Mrps36	28.0018	2522.79	25.2119	1.68e-19	28.8457	1209.79	12.6873	1.48e-16	0.01	27.6772	0.011	0.0105	28.1557	0.0233	0.0739	0.0247	1.0805	7.41e-14	1.99e-11	0	6.76e-05	0.2759	2.5066	0.2944	2.2045	-0.0628397	0.137038	0	0	-0.0169948	-0.047619
Taf13	28.6189	1370.15	14.4759	6.63e-26	28.8851	2208.01	21.0749	2.6e-18	0.0105	28.0159	0.0206	0.0095	28.4941	0.0129	-0.1446	0.0244	-0.6721	0	3.52e-10	0	1.89e-06	0.2951	2.4581	0.2716	2.3925	0.0865243	0.027419	0	0	-0.0167824	0.105263
Krcc1	27.0303	2070.05	18.7705	3.01e-13	29.1532	391.832	5.2011	1e-24	0.0091	26.6732	0.0129	0.0133	27.1277	0.0693	0.5498	0.0244	2.4257	0	7.25e-10	0	1.92e-10	0.2418	2.717	0.3595	1.9838	-0.327399	0.369594	0	0	-0.0167541	-0.315789
Nxf1	29.8496	1781.47	19.4639	2.59e-27	30.5113	1415.09	14.5737	9.86e-22	0.0109	29.3391	0.0165	0.0102	29.8372	0.0213	-0.0907	0.0243	0.3675	0	9.49e-08	0	2.71e-05	0.3198	2.3481	0.3047	2.2058	0.0495569	0.0645117	0	0	-0.0166939	0.0686275
Pdia6	27.4738	1427.79	45.1994	0	28.7589	580.626	19.6729	0	0.0316	26.9381	0.0191	0.034	27.3827	0.0471	0.1066	0.0236	1.3039	0	9.89e-21	0	7.07e-07	0.8497	1.2933	0.9253	1.1127	-0.0817032	0.162308	0	0	-0.0162365	-0.0705882
Tomm7	28.3542	1108.22	23.6979	0	29.1221	786.938	18.936	0	0.0214	27.6258	0.025	0.0241	28.0722	0.0358	0.1713	0.0231	0.5171	0	6.01e-26	0	5.57e-09	0.5869	1.5693	0.676	1.3113	-0.131805	0.196751	0	0	-0.0159019	-0.112033
Atp6ap1	26.3623	570.327	10.2097	0	26.3915	860	17.8941	0	0.0179	25.1886	0.0443	0.0208	25.5848	0.0299	0.2144	0.0225	-0.5679	0	0	0	1.17e-08	0.4515	1.931	0.5298	1.583	-0.147792	0.219836	0	0	-0.0154858	-0.139423
Srsf6	29.2392	556.237	12.9282	0	29.4138	680.659	17.6039	0	0.0233	27.7525	0.0499	0.0259	28.1863	0.0414	0.153	0.0224	-0.2682	0	1.25e-22	0	7.4e-08	0.6411	1.5231	0.7293	1.291	-0.120938	0.179783	0	0	-0.0153905	-0.100386
Idh2	28.8168	773.843	6.504	2.21e-13	29.2099	841.14	7.857	3.2e-12	0.0084	27.771	0.036	0.0093	28.1982	0.0336	0.1516	0.022	-0.0985	0	0	2.14e-20	3.93e-05	0.2328	2.7421	0.2612	2.3354	-0.108729	0.174146	0	0	-0.0151499	-0.0967742
Mthfs	28.707	1489.14	17.6555	5.02e-25	28.8599	3129.17	34.825	1.81e-22	0.0119	28.1497	0.0189	0.0111	28.5812	0.0092	-0.0928	0.0219	-1.0468	0	1e-06	0	2.46e-05	0.3341	2.2486	0.3196	2.1335	0.0453692	0.0539489	0	0	-0.0150973	0.0720721
Tonsl	28.9526	442.825	15.269	0	29.4413	439.49	14.3035	0	0.0345	27.1573	0.0613	0.0326	27.5729	0.0627	-0.0812	0.0219	0.0315	0	3.91e-06	4.09e-06	3.65e-06	0.9346	1.194	0.8946	1.1345	0.0447127	0.052446	0	0	-0.0150728	0.0582822
Atxn10	27.8498	890.842	20.2506	0	29.969	319.11	8.9812	0	0.0227	26.9803	0.0303	0.0282	27.3785	0.0858	0.3083	0.0211	1.5019	0	1.06e-10	0	7.95e-15	0.6094	1.5747	0.7701	1.2525	-0.208674	0.257246	0	0	-0.0145443	-0.195035
Saraf	28.7043	1186.97	10.4421	2.85e-17	29.8101	613.185	5.5581	1.13e-19	0.0088	28.0095	0.0236	0.0091	28.421	0.0464	0.0429	0.021	0.9739	9.8e-20	3.79e-08	0	3.42e-05	0.2466	2.6838	0.2576	2.4134	-0.0427019	0.112041	0	0	-0.0144787	-0.032967
Brd7	26.9132	1846.49	14.1682	1.41e-12	27.5317	1205.28	12.5569	1.78e-17	0.0077	26.5125	0.0144	0.0104	26.8987	0.0225	0.439	0.0209	0.6399	0	1.18e-19	0	1.02e-06	0.2034	2.9562	0.2795	2.2839	-0.272272	0.294365	0	0	-0.0143576	-0.259615
Eif2a	29.1491	1932.97	12.269	1.02e-11	29.8543	1190.21	7.6226	8.18e-11	0.0063	28.7002	0.0149	0.0064	29.1177	0.0245	0.0176	0.0208	0.7115	0.00248	3.8e-06	0	4.72e-06	0.1816	3.0895	0.1867	2.8109	-0.0273166	0.0991142	0	0	-0.0143384	-0.015625
Glyr1	28.1258	540.716	5.6649	6.55e-23	27.9462	921.498	11.723	1.29e-20	0.0105	26.7307	0.0495	0.0128	27.1109	0.0294	0.2836	0.0204	-0.7497	0	2.95e-25	0	3.25e-06	0.28	2.4463	0.3452	1.9888	-0.188876	0.230038	0	0	-0.0140239	-0.179688
Ccdc124	25.8902	1311.34	18.7227	0	26.9501	574.857	9.1773	2.64e-27	0.0143	25.3745	0.0194	0.016	25.7321	0.0449	0.1621	0.0202	1.2095	0	5.52e-20	0	4.55e-05	0.3617	2.1643	0.4107	1.8657	-0.119308	0.160047	0	0	-0.013897	-0.10625
Vps36	27.8742	601.763	4.9788	9.04e-13	29.6197	307.858	2.6453	5.01e-14	0.0083	26.621	0.0443	0.0086	26.9897	0.0877	0.0578	0.0198	0.9846	2.95e-10	5.25e-08	0	2.29e-05	0.2189	2.8647	0.2308	2.5502	-0.0515598	0.123324	0	0	-0.0136608	-0.0348837
Lsm1	31.0734	1029.17	9.5854	1.77e-21	31.1483	1684.49	16.3376	5.7e-20	0.0093	30.1463	0.0294	0.0097	30.5623	0.0181	0.0612	0.0198	-0.6948	8.13e-12	7.94e-20	0	7.2e-05	0.2799	2.5041	0.2948	2.2467	-0.0505427	0.114568	0	0	-0.0136115	-0.0412371
Anapc16	27.8987	831.936	9.6757	0	28.1767	933.542	13.1241	2.79e-27	0.0116	26.967	0.0325	0.014	27.3381	0.0294	0.2737	0.0197	-0.1449	0	5.5e-16	0	1.49e-06	0.3109	2.4163	0.3839	1.9539	-0.190154	0.236655	0	0	-0.0135745	-0.171429
Ikzf1	28.426	864.35	7.7753	1.47e-17	28.5698	1201.39	10.7564	5.81e-16	0.009	27.5061	0.0319	0.0089	27.882	0.0233	-0.0094	0.0196	-0.4511	3.77e-06	6e-10	0	1.19e-05	0.2464	2.6446	0.2481	2.4693	-0.00685208	0.0709918	0	0	-0.0134818	0.011236
Erp44	29.7909	954.364	9.7908	3.06e-23	30.1717	1013.26	12.0963	4.25e-25	0.0103	28.8762	0.0304	0.0119	29.27	0.0291	0.2153	0.0195	-0.0657	0	5.02e-17	4.09e-24	3.87e-05	0.2963	2.3964	0.3461	2.0469	-0.143889	0.170746	0	0	-0.013454	-0.134454
Fbxl5	28.0724	619.09	4.7193	3.73e-15	27.5778	2070.78	19.6689	1.92e-19	0.0077	26.8277	0.0432	0.0095	27.1927	0.0132	0.3062	0.0195	-1.7166	0	1.54e-06	0	2.4e-05	0.2024	3.0704	0.2569	2.543	-0.212145	0.207393	0	0	-0.0134227	-0.189474
[truncated: 765 more rows]

## Sheet: Kat2a_Ac_targets
0610030E20Rik
0610039K10Rik
1110001A16Rik
1110001J03Rik
1110004F10Rik
1110008F13Rik
1110008J03Rik
1110008P14Rik
1110012L19Rik
1110018G07Rik
1110032A03Rik
1110057K04Rik
1700055D18Rik
1700120B22Rik
1810009A15Rik
[truncated: 1,946 more rows]

## Sheet: Ac_targets
Cd52
Ctss
[truncated: 3,028 more rows]
