# Supplementary material for: Loss of Kat2a enhances transcriptional noise and depletes acute myeloid leukemia stem-like cells
Source: eLife journal article supplement (doi:10.7554/elife.51754), 2020-01-27
Supplement: supp [file elife-51754-supp-v1.zip › elife_poa_e51754_Figure_5_source_data_1.xlsx]

## Sheet: cluster_7
#GeneID	kON (Kat2aKO)	kOFF (Kat2aKO)	kRNA(Kat2aKO)	GOF (Kat2aKO)	kON (Kat2aWT)	kOFF (Kat2aWT)	kRNA(Kat2aWT)	GOF (Kat2aWT)	sizeBurst (Kat2aKO)	freqBurst (Kat2aKO)	dutyCycle (Kat2aKO)	sizeBurst (Kat2aWT)	freqBurst (Kat2aWT)	dutyCycle (Kat2aWT)	sizeBurst ratio	freqBurst ratio	dutyCycle ratio	pSize	pFreq	pDuty	p-value	avg (Kat2aKO)	CV (Kat2aKO)	avg (Kat2aWT)	CV (Kat2aWT)	fBurst_ratio	sBurst_ratio	Kat2a_targets	Ac_targets
Calm2	2.1474	3.5528	22.9984	0.435	35.6081	189.419	16.1593	0.0874	6.9088	1.3242	0.3851	0.0857	29.7407	0.1633	-6.3329	4.4893	-1.238	0	0	0	1.56e-20	8.6362	0.6819	2.5286	0.8334	-0.955475	79.6161	1	1
Snrpc	15.0019	1.625	0.7663	0.0108	24.7783	174.179	2.1016	0.633	0.7239	1.4091	0.8683	0.0147	21.261	0.15	-5.6174	3.9154	-2.5333	0	0	0	0.00882	0.6501	1.5873	0.2759	2.2456	-0.933724	48.2449	1	1
Ndufs4	58.4098	2.0615	0.7592	0.000233	30.9129	266.8	2.6473	0.588	0.47	1.9714	0.9584	0.0102	27.6446	0.1052	-5.5308	3.8097	-3.1879	0	0	0	0.000114	0.7194	1.4388	0.2709	2.4682	-0.928688	45.0784	1	1
Cox5a	5.055	4.2748	3.2266	0.00427	30.5	421.797	7.5472	0.000817	1.0333	2.107	0.5758	0.0187	28.3976	0.068	-5.7856	3.7525	-3.0809	0	0	0	2.64e-06	1.7414	1.1036	0.5184	1.489	-0.925804	54.2567	1	1
Ube2k	3.6585	9.1415	3.4595	0.0139	34.5697	317.842	2.8575	0.511	0.4022	2.5501	0.2978	0.0097	31.0692	0.0971	-5.3714	3.6069	-1.6166	0	0	0	0.000859	0.9607	3.5245	0.2738	2.4128	-0.917922	40.4639	1	1
Ywhaq	20.5562	3.3418	1.8899	0.0177	22.7351	141.982	4.1922	0.0729	0.6116	2.5803	0.7798	0.0353	19.3041	0.1602	-4.1142	2.9033	-2.2833	0	0	0	0.000122	1.4297	1.1244	0.5987	1.5382	-0.866334	16.3258	1	1
Atp5o	3.8815	5.2238	4.1144	0.0178	16.7651	86.2249	4.6484	0.00955	0.8578	2.1862	0.4186	0.0541	13.8987	0.1691	-3.9873	2.6685	-1.3077	0	0	0	0.00526	1.671	1.8133	0.7427	1.3544	-0.842705	14.8558	1	1
Cetn3	133.021	3.6542	1.1492	0.00408	25.1301	168.88	2.4856	0.337	0.3861	3.5401	0.9727	0.0166	21.8069	0.1315	-4.5439	2.6229	-2.8872	0	0	0	2.31e-07	1.1136	1.1469	0.3142	2.0867	-0.837661	22.259	1	1
Psmc5	30.3706	4.3063	0.6853	0.0814	25.5725	175.441	1.5892	0.824	0.2072	3.5702	0.8634	0.0092	21.9717	0.1381	-4.4912	2.6216	-2.6443	0	0	0	0.0024	0.5748	1.6731	0.1985	2.4433	-0.837509	21.5217	1	1
Hsp90ab1	4.1519	3.2363	3.4419	0.0085	14.286	46.7096	4.6376	0.00154	1.3807	1.769	0.5814	0.1062	10.6519	0.2527	-3.7001	2.5901	-1.202	0	0	0	0.00409	1.9563	1.0699	1.0778	1.5075	-0.833926	12.0009	1	1
Mrpl17	15.646	10.7518	1.3591	0.0112	40.5486	395.025	1.5672	0.839	0.1385	6.2375	0.5982	0.0046	36.7403	0.0932	-4.8963	2.5583	-2.6827	0	0	0	0.000142	0.7908	1.6494	0.1437	2.6115	-0.830227	29.1087	1	1
Cyc1	12.9154	9.8375	1.5451	0.0142	36.1895	193.602	2.3328	0.0128	0.1623	5.313	0.5648	0.012	30.0483	0.1643	-3.7548	2.4997	-1.7813	0	0	0	0.00194	0.8326	1.4857	0.3496	2.1995	-0.823185	12.525	1	1
Ctsh	12.46	32.797	2.3104	0.000151	46.894	323.393	15.419	0.0157	0.0826	7.7101	0.3431	0.0507	40.6587	0.1239	-0.704	2.3987	-1.4691	0	0	0	6.87e-14	0.5785	2.2145	1.8395	0.9319	-0.81037	0.629191	1	1
Ndufc2	14.7536	16.4857	2.2201	0.00375	44.4123	198.566	2.3348	0.0375	0.2583	7.0585	0.5562	0.0123	36.0744	0.1866	-4.3932	2.3535	-1.5758	0	0	0	9.12e-05	1.1372	1.2401	0.4259	1.8246	-0.804335	20	1	1
Nutf2	14.7542	22.8522	2.4947	0.0053	39.7894	462.394	1.477	0.995	0.1151	8.8695	0.3944	0.0033	36.5906	0.0808	-5.145	2.0445	-2.2871	0	0	0	2.44e-12	0.9642	1.149	0.1144	3.2653	-0.757602	33.8788	1	1
Pgls	14.3083	31.2671	4.0763	0.013	41.4099	254.245	4.1011	0.0368	0.1369	9.7379	0.3115	0.0164	35.2227	0.1424	-3.0599	1.8548	-1.1293	0	0	0	2.66e-05	1.2331	1.0962	0.5397	1.7936	-0.723533	7.34756	1	1
Rpl10a	3.0941	2.9691	10.3392	0.26	7.7884	17.2855	12.0741	0.188	4.2199	1.4735	0.5327	0.7997	5.2344	0.3298	-2.3996	1.8288	-0.6919	0	0	0	0.00455	5.3355	0.6626	3.7836	0.7716	-0.718497	4.27685	1	1
Eif4a1	1.4205	2.2616	18.2159	0.435	5.3601	7.1718	7.0077	0.0412	8.7065	0.8602	0.398	1.1739	3.0048	0.437	-2.8907	1.8045	0.135	0	0	8.59e-17	5.77e-10	7.0348	0.7723	2.9589	0.842	-0.713725	6.41673	1	1
Lsm2	18.6191	96.6622	3.3777	0.0156	56.1494	275.948	1.2593	0.741	0.0354	15.5025	0.1648	0.0045	46.1984	0.1689	-2.9626	1.5753	0.0356	0	0	0.00145	0.0142	0.5295	1.7198	0.1984	2.5555	-0.664436	6.86667	1	1
Mrpl21	36.5451	9.4841	0.4605	0.0122	25.7797	154.908	0.6556	1	0.0604	7.3957	0.7984	0.0043	21.9137	0.1439	-3.7979	1.5671	-2.4719	0	0	0	0.0338	0.3606	2.3365	0.0831	4.0029	-0.662508	13.0465	1	1
Rpl23	2.7591	6.1195	16.703	0.315	9.6487	11.5349	6.689	0.0517	3.0037	1.8704	0.3249	0.8719	5.1558	0.4831	-1.7845	1.4628	0.5725	0	0	0	0.000155	5.2164	0.8346	3.1486	0.7228	-0.637224	2.44501	1	1
Atox1	42.646	14.1597	1.9388	0.00261	33.9083	172.132	9.9277	0.0255	0.1398	10.575	0.7478	0.0595	28.2072	0.1684	-1.233	1.4154	-2.1505	0	0	0	0.0152	1.4377	0.9972	1.6481	0.9162	-0.625096	1.34958	1	1
Dad1	37.675	17.5185	2.6288	0.0269	37.9181	171.163	4.7841	0.00457	0.1618	11.6813	0.6825	0.0281	30.8916	0.1833	-2.5251	1.403	-1.8967	0	0	0	0.000736	1.764	1.0422	0.865	1.2416	-0.621862	4.75801	1	1
Ict1	6.043	7.5713	1.4388	0.000441	23.5114	13.9799	0.4025	0.287	0.2235	3.2995	0.4524	0.0317	8.6068	0.626	-2.8182	1.3832	0.4686	0	0	0	0.0441	0.629	3.705	0.2386	3.214	-0.61664	6.05047	1	1
Banf1	17.9502	44.858	3.0684	0.0216	39.4316	209.36	0.9492	0.937	0.0695	12.751	0.2859	0.0045	32.8366	0.1573	-3.9349	1.3647	-0.862	0	0	0	7.6e-07	0.8568	1.4837	0.135	3.1556	-0.611683	14.4444	1	1
Hmgb2	0.9149	2.6007	39.3207	0.362	2.6538	5.2576	7.4443	0.126	15.7495	0.6727	0.2657	1.5061	1.7309	0.343	-3.3865	1.3634	0.3685	0	0	0	4.83e-12	10.0942	0.9926	2.4501	1.2815	-0.611358	9.45714	1	1
Snx1	15.4686	110.285	1.0236	0.342	37.6312	258.505	3.1577	0.0374	0.01	12.7459	0.1657	0.0127	32.7875	0.1273	0.3473	1.3631	-0.3807	0	0	0	0.00641	0.1174	3.2561	0.3964	1.8347	-0.611257	-0.212598	1	1
Cct7	22.7003	34.912	2.0748	0.00581	32.7139	382.967	3.7204	0.113	0.0631	13.3018	0.3952	0.0101	29.9925	0.0772	-2.6479	1.173	-2.3552	0	0	0	0.0012	0.7698	1.4596	0.2817	2.1304	-0.556496	5.24752	1	1
Mfsd10	25.0873	13.0475	1.5775	0.00994	21.1391	179.105	3.5137	0.318	0.1258	8.4734	0.654	0.0215	18.7499	0.1168	-2.5464	1.1459	-2.4848	0	0	0	0.000101	1.0161	1.2303	0.3831	1.9265	-0.548083	4.85116	1	1
Lmo4	22.0304	240.942	2.2869	0.512	46.6041	377.632	3.3641	0.145	0.01	20.1323	0.0838	0.0091	41.3962	0.1111	-0.1388	1.04	0.4081	2.9e-05	0	0	0.0424	0.1877	3.0077	0.3659	1.8303	-0.513668	0.0989011	1	1
Mrps18a	18.9353	187.782	4.1785	0.0765	42.9637	157.989	0.8715	0.585	0.022	16.8402	0.1029	0.0057	33.5625	0.2146	-1.9487	0.9949	1.0605	0	0	0	0.0148	0.3701	1.7069	0.1813	2.8738	-0.498244	2.85965	1	1
Nol7	23.9813	300.658	6.7592	0.0896	46.2217	375.303	2.3736	0.0169	0.0228	22.1169	0.0758	0.0064	41.1403	0.1095	-1.8438	0.8954	0.5297	0	0	0	0.0359	0.4858	2.0201	0.2524	2.4984	-0.462403	2.5625	1	1
Bnip3l	16.8056	123.749	8.1154	0.00161	33.4191	97.7019	4.7171	0.00678	0.0671	14.6117	0.1225	0.0489	24.5593	0.2599	-0.4551	0.7491	1.0857	0	0	0	0.036	0.9253	1.233	1.1798	1.1098	-0.405044	0.372188	1	1
Ppil2	42.4064	37.07	0.923	0.174	33.1408	359.439	2.5785	0.808	0.0282	18.0459	0.545	0.0072	30.2623	0.0852	-1.9654	0.7459	-2.6774	0	0	0	0.0491	0.4698	2.2394	0.2161	2.2856	-0.403684	2.91667	1	1
Mrps34	47.0588	25.431	0.8577	0.0305	27.5596	210.781	2.0158	0.25	0.038	16.3669	0.6531	0.0098	24.2586	0.1201	-1.9527	0.5677	-2.4428	0	0	0	0.0093	0.5504	1.6289	0.2345	2.478	-0.325316	2.87755	1	1
Dazap2	30.428	93.5019	7.7555	0.019	34.8378	330.762	11.6002	0.0347	0.0829	21.3203	0.2816	0.034	31.15	0.0995	-1.285	0.547	-1.501	0	0	0	0.0038	1.7543	1.0153	1.0232	1.3265	-0.31556	1.43824	1	1
Dusp1	1.4014	2.2998	14.5672	0.301	1.534	5.4802	40.2944	0.327	7.1064	0.8522	0.3964	7.6997	1.1863	0.2269	0.1157	0.4773	-0.8048	4.11e-16	0	0	0.000669	5.5516	0.8736	8.7136	0.9007	-0.281632	-0.077055	1	1
Slc25a17	34.1934	452.65	5.3062	0.204	50.9689	324.73	1.0875	0.561	0.0119	31.7539	0.0704	0.0034	43.8211	0.1361	-1.8256	0.4647	0.9514	0	0	0	0.0411	0.3762	1.9109	0.1433	2.6114	-0.275374	2.5	1	1
Cdk2ap2	1.5551	2.8751	12.4389	0.0696	3.1017	2.5258	5.0018	0.0577	4.7506	0.9977	0.3617	2.3896	1.3563	0.5585	-0.9914	0.443	0.6267	0	0	0	0.0227	4.3364	0.9705	2.7141	0.9664	-0.264396	0.988031	1	1
Wdr61	97.4228	9.107	0.458	0.0766	30.9815	17.2946	0.2981	0.0833	0.0624	8.1832	0.915	0.018	10.3352	0.6343	-1.7932	0.3368	-0.5286	0	0	0	0.0403	0.4093	2.1157	0.1736	3.3842	-0.20822	2.46667	1	1
Rps11	3.3222	4.7508	16.7825	0.429	3.1102	8.2885	20.6374	0.196	3.9551	1.9161	0.4267	2.585	2.2355	0.2795	-0.6135	0.2224	-0.6106	0	0	0	0.00923	6.9704	0.6052	5.585	0.823	-0.142876	0.530019	1	1
Arpp19	46.1094	159.36	4.6144	0.00554	41.2349	424.46	5.1827	0.0203	0.0318	35.6343	0.2244	0.0122	37.4186	0.0903	-1.3856	0.0705	-1.3124	0	2.09e-18	0	0.000299	1.0236	1.1244	0.451	1.6527	-0.0476848	1.60656	1	1
Strap	53.9369	628.539	7.3997	0.0301	56.0117	690.582	3.2184	0.39	0.0115	49.2938	0.0823	0.0047	51.6668	0.0761	-1.2986	0.0678	-0.1127	0	6.55e-12	0	0.00971	0.56	1.5387	0.2395	2.2307	-0.0459289	1.44681	1	1
Srp19	31.598	54.2022	1.3941	0.0262	21.0038	406.368	3.9631	0.738	0.0294	19.5569	0.3881	0.0098	19.9287	0.0504	-1.5815	0.0272	-2.944	0	2.79e-13	0	0.00419	0.5217	1.6046	0.1981	2.4368	-0.0186565	2	1	1
2010107E04Rik	38.8423	103.094	1.8199	0.0636	30.5846	349.332	1.9154	0.88	0.018	28.0777	0.2745	0.0055	28.0559	0.0803	-1.7022	-0.0011	-1.7727	0	0.00431	0	0.0368	0.4912	2.1111	0.1535	2.5092	0.00077702	2.27273	1	1
Btf3l4	28.2019	360.215	7.8245	0.0234	27.1616	297.397	1.9985	0.265	0.0225	26.0847	0.0743	0.0067	24.6927	0.0862	-1.7416	-0.0791	0.214	0	0.000143	6.33e-16	3.26e-05	0.5655	1.345	0.1573	2.6917	0.0563729	2.35821	1	1
Lgals1	1.3179	3.0314	13.2524	0.31	1.6969	1.689	5.0294	0.015	4.9418	0.8978	0.3242	3.1671	0.8293	0.5034	-0.6419	-0.1146	0.6348	0	0.000434	0	0.0134	4.0519	1.0374	2.4461	1.1495	0.0825998	0.560355	1	1
Pkm	2.6587	3.6221	12.9265	0.364	2.3923	2.9165	8.9359	0.0831	4.1612	1.5032	0.4411	3.4144	1.2745	0.4678	-0.2854	-0.2381	0.0848	4.34e-10	3.12e-19	1.45e-10	0.00685	5.5097	0.7105	4.0172	0.8645	0.179443	0.218721	1	1
Serp1	12.6862	38.5449	9.5231	0.041	13.3535	18.0736	5.9411	0.0518	0.2348	8.9064	0.2735	0.3516	7.5328	0.4279	0.5822	-0.2416	0.6456	0	0	0	0.00355	2.0081	0.9757	2.4899	0.895	0.182349	-0.332196	1	1
Ndufs6	39.2603	206.24	3.1592	0.00229	31.8962	176.235	1.4505	0.294	0.0151	32.228	0.1631	0.0086	26.922	0.1568	-0.8182	-0.2595	-0.0572	0	0	2.33e-16	0.0309	0.4414	1.7233	0.2177	2.6621	0.197088	0.755814	1	1
Ndufs8	25.3963	267.173	14.6981	0.0547	20.869	224.789	6.1688	0.00495	0.0556	23.1327	0.0877	0.028	19.0614	0.0867	-0.9911	-0.2793	-0.0175	0	0	0.0307	0.000197	1.2804	1.1338	0.5328	1.6276	0.213589	0.985714	1	1
Pgap2	29.6741	201.433	2.5278	0.178	28.4866	87.7573	0.304	1	0.0128	25.8267	0.1291	0.0035	20.9856	0.252	-1.8833	-0.2995	0.9646	0	0	0	0.00419	0.3211	2.0156	0.0628	4.8074	0.230687	2.65714	1	1
Rpn2	23.2421	138.03	8.1485	0.0381	33.3882	26.1465	1.2393	0.00887	0.0623	19.3763	0.1641	0.0517	14.3671	0.5681	-0.2678	-0.4315	1.7918	0	0	0	0.017	1.1632	1.1981	0.6822	1.5652	0.348658	0.205029	1	1
Ndufb10	34.9234	261.516	10.4419	0.00102	26.3377	168.891	5.6967	0.0138	0.0402	30.6182	0.1186	0.034	22.6066	0.1381	-0.2414	-0.4376	0.2196	1.13e-26	0	1e-17	0.0176	1.2066	1.0634	0.7481	1.3798	0.354392	0.182353	1	1
Eny2	39.0778	321.038	4.1589	0.345	27.1725	288.431	1.3733	0.264	0.0131	34.685	0.1117	0.0048	24.6736	0.0872	-1.4515	-0.4913	-0.3577	0	0	0	0.0106	0.4494	1.9201	0.1151	2.9849	0.405754	1.72917	1	1
Srp9	24.3353	375.603	24.0566	0.00939	26.4601	44.9696	1.7465	0.0111	0.0675	22.7646	0.0659	0.0431	16.1131	0.3916	-0.6463	-0.4986	2.5711	0	0	0	2.27e-05	1.4974	1.2521	0.6461	1.5392	0.412801	0.566125	1	1
2410015M20Rik	10.8944	32.2558	4.1562	0.00476	21.1317	8.0002	0.6496	0.0166	0.1305	8.0274	0.2517	0.0958	5.5202	0.7176	-0.4454	-0.5402	1.5118	0	0	0	0.00118	0.9997	1.3487	0.451	1.8211	0.454186	0.362213	1	1
Rpl18	2.2499	2.4669	11.4159	0.189	1.9744	1.3285	6.1704	0.196	6.3695	1.1324	0.5195	6.2457	0.7741	0.6221	-0.0283	-0.5488	0.2601	0.00217	7.94e-21	0	0.000436	5.7235	0.6558	3.7629	0.7862	0.46286	0.0198216	1	1
Rpl8	3.2697	3.8901	14.2158	0.569	2.1001	2.2644	10.1917	0.171	4.4913	1.6974	0.4866	5.1752	1.0666	0.4996	0.2045	-0.6704	0.0381	1.34e-14	0	0.000261	0.00781	6.5419	0.6112	4.9764	0.7501	0.591412	-0.132149	1	1
Itm2b	10.4059	54.2459	84.3265	0.292	6.1225	41.4354	70.4501	0.662	1.7275	8.5918	0.1774	2.0704	5.1872	0.1645	0.2612	-0.728	-0.1083	2.91e-21	0	2.47e-10	7.92e-07	13.6879	0.4352	9.7926	0.5688	0.656346	-0.16562	1	1
Tmx1	69.1366	720.163	8.3841	0.00371	39.2249	279.14	2.5606	0.142	0.0117	62.9403	0.0875	0.0094	34.171	0.1224	-0.3158	-0.8812	0.484	0	0	0	0.00122	0.7352	1.2941	0.3069	1.9428	0.841922	0.244681	1	1
Pmaip1	36.3564	283.468	6.9818	0.00149	19.0048	148.822	1.9094	0.83	0.0256	32.1109	0.1168	0.0138	16.8018	0.1179	-0.8879	-0.9344	0.0133	0	0	0.000441	7.75e-05	0.8059	1.4662	0.2157	2.5941	0.911158	0.855072	1	1
2610001J05Rik	37.5883	363.204	6.7413	0.0386	20.2416	136.023	2.2364	0.0767	0.0188	33.9189	0.0963	0.017	17.497	0.1353	-0.1504	-0.955	0.4912	3.58e-17	0	0	0.00226	0.6375	1.4894	0.2808	2.398	0.938555	0.105882	1	1
Tomm5	47.7127	60.0301	1.5915	0.00416	12.6574	132.976	3.3631	0.267	0.0274	25.8562	0.4274	0.0256	11.524	0.0885	-0.1013	-1.1659	-2.2724	0.0121	0	0	0.000213	0.6486	1.7431	0.28	4.6196	1.24368	0.0703125	1	1
H2-Ke6	38.0463	435.336	5.4087	0.177	16.4803	80.2627	1.3816	0.0258	0.0125	34.8325	0.0822	0.018	13.4373	0.1855	0.5254	-1.3742	1.1733	0	0	0	0.021	0.4393	1.6525	0.2299	2.7582	1.59222	-0.305556	1	1
Msrb1	25.3574	44.0838	8.1865	0.0763	2.6512	1.5763	6.9535	0.317	0.1883	15.7888	0.3665	5.3747	0.9652	0.6366	4.8348	-4.032	0.7966	0	0	0	4.52e-07	2.8805	0.7749	4.3735	0.6638	15.3581	-0.964965	1	1
Eif4e	9.1054	2.1151	1.424	0.0123	33.2512	200.298	2.7099	0.295	0.7634	1.6837	0.8042	0.0139	28.404	0.1456	-5.7842	4.0764	-2.4659	0	0	0	2.98e-05	1.1304	1.2996	0.3752	1.9261	-0.940723	53.9209	0	1
Tnfaip8l2	33.4027	9.0799	0.518	0.148	35.5106	210.541	5.0497	0.0253	0.059	6.3356	0.7283	0.0247	30.3036	0.1432	-1.256	2.2579	-2.3459	0	0	0	6.72e-05	0.3431	2.6294	0.7107	1.4389	-0.790929	1.38866	0	1
Syce2	16.3926	6.0092	0.5859	0.045	21.9641	225.806	0.7895	1	0.1142	4.254	0.7395	0.0033	19.4652	0.098	-5.0925	2.194	-2.9161	0	0	0	0.00234	0.4205	2.3473	0.0515	5.4079	-0.781456	33.6061	0	1
Gstm1	1.4304	2.1242	7.6061	0.162	7.1331	6.8456	1.0237	0.0255	3.8946	0.8353	0.4171	0.1723	3.4169	0.5229	-4.4981	2.0322	0.3262	0	0	0	1.36e-15	3.0362	1.1231	0.5231	2.0091	-0.755539	21.6036	0	1
Sat1	6.3678	4.3325	2.9308	0.0513	35.0826	11.5157	4.1319	0.0459	0.8141	2.5351	0.6026	0.3728	8.4426	0.7427	-1.1267	1.7356	0.3017	0	0	0	3.18e-09	1.7495	0.9465	3.0549	0.6659	-0.699725	1.18374	0	1
Bin2	23.0961	211.948	6.9049	0.0033	76.4201	720.915	12.2679	0.00863	0.0339	20.745	0.1019	0.017	68.7533	0.0983	-0.9939	1.7287	-0.052	0	0	1.23e-08	1.4e-05	0.6878	1.4508	1.1674	0.9568	-0.698269	0.994118	0	1
Mapre1	26.46	11.5809	1.0224	0.00152	26.9283	234.22	3.093	0.078	0.1054	7.7934	0.6979	0.0151	23.824	0.1225	-2.8018	1.6121	-2.5106	0	0	0	0.046	0.6918	1.6984	0.3349	2.2736	-0.672876	5.98013	0	1
Lyz2	0.771	5.0498	42.9301	0.153	2.7831	4.5522	165.35	0.339	8.8101	0.6644	0.1382	38.4317	1.7119	0.3875	2.1251	1.3655	1.4871	0	0	0	0	5.3219	1.6278	63.1099	0.4669	-0.611893	-0.77076	0	1
Cebpe	7.2793	6.699	2.1617	0.000367	28.2423	11.3231	0.2496	0.845	0.4032	3.4069	0.5277	0.0322	7.5206	0.7182	-3.6478	1.1424	0.4449	0	0	0	3.01e-07	1.1022	1.5516	0.1666	3.0437	-0.546991	11.5217	0	1
Slc48a1	22.1075	163.01	5.167	0.00143	40.7651	295.114	1.3776	0.958	0.0322	19.3946	0.1195	0.0048	35.6758	0.1233	-2.7566	0.8793	0.0452	0	0	3.03e-12	0.0169	0.6018	2.7991	0.1595	2.7324	-0.456365	5.70833	0	1
Coro1b	31.409	396.745	4.146	0.456	58.2826	465.075	5.0542	0.00939	0.0112	29.0837	0.0728	0.0109	51.3681	0.1111	-0.0439	0.8207	0.6104	0.0162	0	0	0.016	0.2975	2.1427	0.5328	1.5177	-0.433818	0.0275229	0	1
Psma6	15.952	58.413	9.0372	0.0236	20.5717	90.6412	3.605	0.0207	0.1553	12.3071	0.2203	0.0423	16.7054	0.1861	-1.8774	0.4408	-0.2431	0	0	2.04e-27	6.78e-09	1.8733	1.0074	0.6506	1.8936	-0.263286	2.67139	0	1
1810037I17Rik	32.0156	307.119	10.4844	0.00109	41.7674	314.808	3.4093	0.0104	0.0362	28.9482	0.097	0.0109	36.7875	0.1175	-1.7357	0.3457	0.2767	0	0	0	9.41e-06	0.9918	1.307	0.3948	2.1216	-0.213097	2.3211	0	1
Tuba4a	36.3941	70.8874	4.0383	0.000747	32.142	224.187	3.0191	0.0448	0.0601	23.7937	0.3374	0.0137	27.8498	0.1316	-2.1379	0.2271	-1.3583	0	0	0	8.91e-08	1.3275	1.4113	0.3677	2.3011	-0.145642	3.38686	0	1
Alox5ap	2.5277	6.102	13.1151	0.153	2.772	5.0333	17.2567	0.118	2.3376	1.7543	0.3056	3.616	1.7633	0.362	0.6294	0.0074	0.2442	0	0.00148	0	1.15e-07	3.7844	1.1001	6.0818	0.7386	-0.00510407	-0.35354	0	1
Tctex1d2	170.428	33.0521	0.5587	0.151	32.7217	157.611	0.6978	0.998	0.0181	27.5905	0.8393	0.0044	26.8553	0.173	-2.0353	-0.039	-2.2788	0	5.24e-07	0	0.00439	0.4608	1.8598	0.1126	2.9942	0.0273763	3.11364	0	1
Cd53	18.9936	96.5319	10.8388	0.0291	18.0122	28.173	5.6451	0.0171	0.1253	15.868	0.1648	0.2072	10.8393	0.3883	0.7256	-0.5499	1.2368	0	0	0	0.00478	1.7659	1.0989	2.1422	0.9469	0.463932	-0.39527	0	1
Chmp4b	36.9912	513.913	4.9852	0.215	22.7466	180.08	6.7466	0.000537	0.0099	34.4216	0.0669	0.0385	20.0476	0.1152	1.9658	-0.7799	0.7844	0	0	0	0.000228	0.3372	1.8077	0.7459	1.2757	0.716994	-0.742857	0	1
Psap	16.3518	8.2781	1.4382	0.00297	3.8591	3.7244	6.8284	0.0815	0.1877	5.0445	0.6162	2.2198	1.8593	0.5225	3.5635	-1.4399	-0.238	0	0	0	1.49e-22	0.8227	1.8608	3.486	0.7909	1.71312	-0.915443	0	1
Yaf2	49.0618	498.735	6.2727	0.0547	19.4048	111.066	1.6974	0.0943	0.0134	44.4444	0.0882	0.0153	16.2917	0.1569	0.1958	-1.4479	0.8302	0	0	0	0.0122	0.538	1.6507	0.2403	2.5772	1.72804	-0.124183	0	1
AB124611	29.9926	317.267	9.3283	0.0699	18.6291	21.5652	2.4081	0.00129	0.0296	27.3751	0.0867	0.1289	9.7562	0.473	2.1207	-1.4885	2.4477	0	0	0	0.0035	0.7963	1.4956	1.1022	1.1197	1.80592	-0.770365	0	1
Lsp1	21.2124	85.4561	2.3696	0.157	3.4083	4.4287	8.7671	0.151	0.031	16.7769	0.2139	3.0597	1.8564	0.4812	6.6258	-3.1759	1.1698	0	0	0	0	0.4723	1.8604	3.9689	0.8068	8.03733	-0.989868	0	1
Fcnb	0.6963	3.1149	21.3681	0.416	64.4471	441.318	1.5316	0.103	7.115	0.5663	0.1872	0.0035	55.6695	0.1278	-10.997	6.6191	-0.5513	0	0	0	4.81e-16	3.6899	1.6995	0.1768	3.4842	-0.989827	2031.86	0	0
Rps28	3.6387	1.7772	5.5224	0.116	36.4274	311.666	22.1293	0.0015	3.4735	1.1282	0.66	0.0721	32.4146	0.1081	-5.5894	4.8445	-2.6094	0	0	0	0.000865	3.5586	0.7108	2.2847	0.7165	-0.965195	47.1761	0	0
Gm10020	103.658	1.3884	0.5561	0.0116	37.1909	328.066	1.5859	0.754	0.4896	1.3602	0.9783	0.0048	33.0945	0.1057	-6.6691	4.6047	-3.2107	0	0	0	0.00121	0.54	1.6016	0.1567	2.5035	-0.9589	101	0	0
Ube2c	1.3885	2.3129	3.2051	2.26e-07	23.8861	134.432	0.4016	0.997	1.5696	0.8517	0.3866	0.003	19.91	0.1523	-9.0115	4.547	-1.3438	0	0	0	0.000371	1.1759	2.1373	0.0441	6.473	-0.957223	522.2	0	0
Srsf3	5.0493	3.5525	2.9776	0.0154	53.8468	187.088	3.3629	0.00203	1.3504	1.8728	0.6346	0.0192	41.34	0.2365	-6.1357	4.4643	-1.4239	0	0	0	2.03e-05	1.7692	1.0782	0.7576	1.6751	-0.954698	69.3333	0	0
Ndufa12	9.1621	4.8899	1.5578	0.000317	57.3698	840.492	4.2795	0.239	0.4802	3.0488	0.6794	0.0051	53.1672	0.0647	-6.5433	4.1242	-3.3928	0	0	0	0.000429	1.0317	1.5035	0.2565	2.0722	-0.942656	93.1569	0	0
Stra13	3.9659	4.8257	3.0411	0.00249	37.0058	275.205	2.8724	0.212	0.7145	2.1022	0.4619	0.0107	32.5685	0.1196	-6.0635	3.9535	-1.9489	0	0	0	8.51e-06	1.3401	1.501	0.338	2.0089	-0.935453	65.7757	0	0
Ddx39b	7.6075	5.4041	1.8226	0.00886	52.1198	375.98	2.8977	0.195	0.4603	3.0428	0.5998	0.0076	45.1072	0.1279	-5.9214	3.8899	-2.2292	0	0	0	2.8e-05	1.049	1.2598	0.3399	1.8711	-0.932543	59.5658	0	0
Tipin	4.3271	5.7398	2.2673	0.000593	41.3345	252.29	0.7779	1	0.4366	2.4158	0.4322	0.0031	35.3637	0.1414	-7.1368	3.8717	-1.6118	0	0	0	0.000127	0.9509	2.4676	0.1042	3.1469	-0.931687	139.839	0	0
Acp1	5.0853	6.1563	1.5625	0.000211	40.3148	532.383	2.534	0.472	0.2738	2.7068	0.4558	0.0049	37.4024	0.0699	-5.8074	3.7884	-2.7048	0	0	0	0.00885	0.6659	3.9306	0.1721	2.8821	-0.92763	54.8776	0	0
Dbi	3.1738	4.3571	4.6907	0.0478	27.2437	172.262	6.2578	0.0442	1.1727	1.7968	0.4315	0.0373	23.3364	0.1428	-4.9745	3.6991	-1.5955	0	0	0	0.000845	1.9566	1.4465	0.8546	1.2711	-0.923004	30.4397	0	0
Npm1	2.6741	1.918	4.2044	0.0607	16.2699	53.0454	3.8665	0.00711	2.9802	1.0678	0.6061	0.075	12.2394	0.2439	-5.3119	3.5189	-1.3133	0	0	0	6.82e-08	2.4686	0.9504	0.8862	1.486	-0.912757	38.736	0	0
Pilra	7.6292	6.5587	0.6531	0.179	40.9871	436.262	6.3045	0.208	0.1112	3.393	0.5556	0.0149	37.3399	0.0855	-2.8991	3.4601	-2.6998	0	0	0	0.0119	0.3456	2.5743	0.5316	1.5759	-0.909132	6.46309	0	0
Sec11c	4.01	3.005	3.2935	0.0304	21.6446	80.2451	4.8821	0.0147	1.6746	1.6654	0.6003	0.0635	16.9616	0.2136	-4.7208	3.3483	-1.491	0	0	0	0.0216	1.9279	1.0916	1.0168	1.1293	-0.901814	25.3717	0	0
Psma2	5.4867	3.8424	4.0594	0.00714	27.0036	93.9456	5.5272	0.00215	1.3912	2.1915	0.5947	0.0629	20.7718	0.2223	-4.4668	3.2446	-1.4196	0	0	0	0.000184	2.3476	0.927	1.1829	1.2644	-0.894496	21.1176	0	0
Alg5	11.3362	12.1569	0.8691	0.16	63.8348	376.59	1.1063	0.48	0.0763	5.7319	0.484	0.0028	52.5245	0.1603	-4.7696	3.1959	-1.5946	0	0	0	0.0272	0.4089	2.0775	0.1367	3.1617	-0.890872	26.25	0	0
Serbp1	2.2674	3.6696	8.9351	0.224	30.136	23.7215	1.8344	0.0741	2.6958	1.3837	0.3952	0.0848	12.506	0.5139	-4.9904	3.176	0.379	0	0	0	4.89e-14	3.4444	1.0263	0.8961	1.4668	-0.889357	30.7901	0	0
Hist1h2ap	3.295	3.1254	2.2152	0.000114	20.165	29.9931	0.5175	0.274	0.8719	1.5225	0.5374	0.0179	11.9709	0.4032	-5.6059	2.975	-0.4145	0	0	0	3.15e-06	1.1268	1.7344	0.1967	4.4609	-0.872817	47.7095	0	0
Lmnb1	16.1855	9.1969	0.5944	0.339	46.6072	425.309	0.9415	0.811	0.1145	5.5177	0.6721	0.0023	41.8733	0.0993	-5.6439	2.9239	-2.7592	0	0	0	0.00663	0.3788	2.1608	0.0859	4.4634	-0.868229	48.7826	0	0
Myb	6.1956	5.4872	1.4159	0.0015	23.0432	211.65	0.8444	0.676	0.2831	2.7047	0.5215	0.0039	20.4322	0.1076	-6.1655	2.9173	-2.2768	0	0	0	9.95e-05	0.6883	2.9986	0.0728	4.3402	-0.867626	71.5897	0	0
Ifi27	17.8776	8.9337	0.7232	0.102	44.8076	530.757	1.8062	0.0405	0.1353	5.6336	0.6911	0.0034	41.2845	0.0779	-5.3097	2.8735	-3.1484	0	0	0	0.00161	0.4787	1.8957	0.1352	3.8895	-0.863542	38.7941	0	0
Coa3	5.1383	7.1061	2.2788	0.00338	25.0232	147.891	2.7007	0.173	0.3485	2.9324	0.4255	0.0182	21.2313	0.1481	-4.2592	2.856	-1.523	0	0	0	0.0474	0.9417	2.4729	0.3774	1.9188	-0.861883	18.1484	0	0
Ppp1cc	5.5768	9.5314	3.6415	0.0109	33.3249	79.8701	1.7642	0.0139	0.5307	3.4007	0.4101	0.0254	23.2714	0.2902	-4.3869	2.7746	-0.4987	0	0	0	0.000196	1.3916	1.7227	0.4965	1.4184	-0.853868	19.8937	0	0
Camp	0.6814	4.4176	27.7766	0.0178	17.1152	5.2094	0.9042	0.00648	6.5654	0.5872	0.1384	0.2478	3.9263	0.7664	-4.7275	2.7413	2.4694	0	0	0	0.000156	3.3813	1.9863	0.6768	1.2691	-0.850444	25.4948	0	0
Ranbp1	1.3593	1.9388	10.1212	0.336	11.0079	9.9977	1.4964	0.00217	5.765	0.7874	0.4244	0.1566	5.1742	0.5199	-5.2026	2.7162	0.2926	0	0	0	4.68e-17	4.1416	0.9715	0.7637	1.7779	-0.847822	35.8135	0	0
Mrps17	13.9577	17.1675	1.2576	0.0551	54.505	353.22	2.0352	0.298	0.0793	7.4829	0.4462	0.0058	47.1319	0.1343	-3.7801	2.655	-1.7326	0	0	0	0.0184	0.5397	1.6594	0.2684	2.4864	-0.841235	12.6724	0	0
Slc25a5	1.5712	1.8839	20.2737	0.219	7.8331	15.7729	12.5917	0.0905	12.3955	0.8418	0.4725	0.9073	5.1969	0.3287	-3.7722	2.626	-0.5235	0	0	0	4.36e-11	9.2968	0.6699	4.0571	0.7109	-0.838019	12.662	0	0
Hmgb3	29.9996	4.0498	0.6006	0.00585	22.1715	498.082	1.0028	0.947	0.1584	3.4489	0.8609	0.0021	21.0887	0.0474	-6.2705	2.6122	-4.1823	0	0	0	6.53e-05	0.5085	1.9246	0.0388	5.1566	-0.836457	74.4286	0	0
Vdac2	9.9125	10.327	3.7758	0.0228	33.1486	262.864	9.2382	0.0319	0.5435	4.8408	0.5241	0.0359	29.0576	0.1227	-3.9207	2.5856	-2.0945	0	0	0	0.0064	1.8815	0.933	1.034	1.0683	-0.833407	14.1393	0	0
Dnajb11	36.2571	2.8235	0.5401	0.0383	16.7831	139.555	2.9795	0.0572	0.2297	2.5783	0.9206	0.022	14.8239	0.1141	-3.3813	2.5234	-3.0127	0	0	0	0.0192	0.4929	1.4841	0.3169	2.1992	-0.826071	9.44091	0	0
Rpl6l	16.8832	13.6276	3.279	0.00501	44.9589	512.325	7.0266	0.0303	0.2568	7.3457	0.5487	0.0138	41.1659	0.0813	-4.2144	2.4865	-2.7547	0	0	0	6.84e-10	1.7591	0.8952	0.5597	1.4673	-0.821559	17.6087	0	0
0610007P14Rik	15.0303	8.1924	0.6408	0.0856	32.3104	326.248	0.8637	1	0.0841	5.2765	0.6481	0.0027	29.3514	0.0913	-4.964	2.4758	-2.828	0	0	0	0.0143	0.4027	2.3934	0.0702	4.4079	-0.82023	30.1481	0	0
Gm6133	21.1565	12.0739	1.9278	0.0188	46.0698	310.275	2.4679	0.106	0.193	7.337	0.6166	0.0081	39.7169	0.136	-4.5805	2.4365	-2.1807	0	0	0	6.23e-07	1.1401	1.1666	0.3209	1.8533	-0.815268	22.8272	0	0
Dtnbp1	16.1923	11.9489	0.572	0.159	40.729	334.598	0.6678	0.392	0.0558	6.7769	0.5816	0.002	36.0975	0.1094	-4.8072	2.4132	-2.4105	0	0	0	0.00221	0.3182	1.9655	0.0599	4.9073	-0.812261	26.9	0	0
Gm10282	16.7161	13.8436	1.6237	0.0556	36.9776	442.597	0.4932	0.997	0.1818	6.4294	0.6047	0.0012	33.9443	0.0755	-7.2894	2.4004	-3.0015	0	0	0	5.27e-12	0.8519	1.3635	0.0284	5.9899	-0.81059	150.5	0	0
Minos1	15.9752	8.1673	1.8889	0.0142	34.4843	141.562	2.5988	0.00571	0.2659	5.2805	0.6615	0.0186	27.6532	0.1977	-3.8343	2.3887	-1.7425	0	0	0	1.88e-06	1.2382	1.1094	0.5045	1.9651	-0.809046	13.2957	0	0
Pabpc1	9.1998	36.5394	17.4987	0.25	42.7002	295.121	11.454	0.00107	0.826	7.153	0.2631	0.0393	37.048	0.1323	-4.395	2.3728	-0.9914	0	0	0	1.54e-11	4.0352	0.7705	1.4541	0.9039	-0.806926	20.0178	0	0
Lgals3	0.6776	2.9703	21.0663	0.0767	3.4501	18.1385	84.676	0.643	7.485	0.5489	0.1916	5.5933	2.7973	0.2009	-0.4203	2.3493	0.0682	0	0	1.33e-17	0	3.6997	1.6652	14.2752	0.5896	-0.803775	0.338208	0	0
Bag1	18.7436	11.0777	1.5778	0.0137	37.2836	297.841	5.6489	0.0127	0.2418	6.7617	0.6518	0.0195	33.0519	0.1117	-3.6303	2.2893	-2.5447	0	0	0	0.0286	0.9958	1.2631	0.6268	1.5661	-0.795422	11.4	0	0
Dnajc9	14.4094	20.0066	1.244	0.00537	44.0699	345.926	0.7247	1	0.0757	7.9329	0.4486	0.0021	38.5833	0.1104	-5.1461	2.2821	-2.0227	0	0	0	4.75e-05	0.5121	1.7759	0.0677	4.21	-0.794396	35.0476	0	0
Sumo2	3.1059	2.2774	5.2579	0.167	20.5565	8.3514	1.577	0.0228	3.0553	1.2736	0.5891	0.22	5.7671	0.7132	-3.7955	2.1789	0.2758	0	0	0	1.56e-09	3.009	0.8525	1.1116	1.1877	-0.779161	12.8877	0	0
Mpc1	9.0632	13.7787	5.5349	0.125	113.054	29.3226	1.3783	0.00678	0.5337	5.2585	0.4376	0.0604	23.1093	0.8006	-3.1432	2.1357	0.8716	0	0	0	9.2e-06	2.2838	0.8608	1.082	1.2173	-0.772451	7.83609	0	0
Cdkn3	42.3463	30.1531	0.7656	0.0288	87.8824	514.634	0.438	0.533	0.0257	17.253	0.5768	0.0009	74.8258	0.1463	-4.9166	2.1167	-1.9793	0	0	0	0.00603	0.4213	2.5592	0.0548	6.2317	-0.769424	27.5556	0	0
Tk1	13.2652	12.8594	1.2699	2.11e-05	31.5629	181.288	0.4627	0.839	0.1132	6.2454	0.5121	0.0027	26.7727	0.1513	-5.3947	2.0999	-1.7587	0	0	0	6.54e-06	0.6168	1.7566	0.0621	5.3912	-0.766725	40.9259	0	0
Bub3	15.4343	53.5004	5.1329	0.0359	52.3702	542.665	5.5482	0.0177	0.1034	11.842	0.2318	0.0103	47.351	0.0874	-3.3328	1.9995	-1.4077	0	0	0	0.0089	1.1296	1.4401	0.4579	1.7412	-0.74991	9.03883	0	0
Sypl	52.4515	7.9193	1.1403	0.0193	30.3074	201.355	2.0743	0.313	0.1577	6.6322	0.8416	0.0105	26.1494	0.1356	-3.9081	1.9792	-2.6337	0	0	0	9.36e-07	0.951	1.2245	0.2634	2.3456	-0.746373	14.019	0	0
Snrpa1	9.698	10.1227	0.9303	0.00351	21.1992	170.523	1.2962	0.978	0.1658	4.7886	0.5309	0.0084	18.7722	0.1156	-4.3008	1.9709	-2.1992	0	0	0	0.0106	0.4687	1.8341	0.1436	2.8272	-0.74491	18.7381	0	0
Atp5g2	2.8619	3.3826	4.5729	0.0592	13.166	11.8937	0.9665	0.018	1.5483	1.5157	0.4697	0.0883	5.9019	0.5368	-4.1316	1.9612	0.1925	0	0	1.96e-22	2.58e-11	2.0709	1.2481	0.4854	1.8698	-0.743184	16.5345	0	0
Rad21	18.3951	15.8877	0.5276	0.547	33.4693	434.886	0.6252	1	0.0343	8.209	0.5364	0.0014	31.0155	0.072	-4.5816	1.9177	-2.8964	0	0	0	0.0128	0.268	2.311	0.0385	5.1545	-0.735326	23.5	0	0
Snrpd1	21.9021	7.0465	1.5362	0.000416	24.6948	57.1047	0.5428	0.958	0.2676	4.6571	0.7117	0.0096	17.1522	0.3027	-4.8082	1.8809	-1.2333	0	0	0	4.93e-08	1.0453	1.4066	0.1557	3.006	-0.728484	26.875	0	0
Ndufa11	31.9457	13.5352	1.7621	0.00197	32.8561	419.411	8.4426	0.0312	0.1838	8.8285	0.6351	0.021	30.2991	0.0797	-3.1315	1.779	-2.9936	0	0	0	0.0448	1.0405	1.2596	0.6224	1.933	-0.708622	7.75238	0	0
Lta4h	13.3552	31.5502	3.6374	0.00333	33.0231	200.924	0.8392	0.637	0.1498	8.4972	0.3623	0.0044	28.2269	0.1393	-5.0972	1.732	-1.3788	0	0	0	5.59e-13	1.078	1.1728	0.1117	2.9938	-0.698968	33.0455	0	0
S100a8	0.6824	1.183	31.2315	0.791	2.175	4.1123	4.8978	0.0086	27.8704	0.4291	0.3725	1.335	1.3929	0.3601	-4.3839	1.6987	-0.0489	0	0	1.77e-08	5.42e-16	11.3556	0.9097	1.6765	1.9623	-0.691938	19.8767	0	0
Tecr	8.2745	14.5551	5.8877	0.0324	61.7953	21.8726	0.9647	0.00459	0.7821	5.0126	0.4374	0.0452	15.8845	0.726	-4.1122	1.664	0.7311	0	0	0	5.31e-12	2.355	1.0092	0.6885	1.319	-0.684435	16.3031	0	0
Prmt1	29.0223	272	13.4748	0.0127	84.2383	941.339	4.2204	0.499	0.05	26.1698	0.097	0.0045	77.2574	0.0827	-3.4718	1.5618	-0.2299	0	0	0	1.92e-09	1.288	1.1415	0.3512	2.1218	-0.661265	10.1111	0	0
Vsir	172.102	4.3165	0.3254	0.113	19.9943	31.2132	2.2153	0.0589	0.0898	4.1025	0.9534	0.0723	11.9902	0.3903	-0.3129	1.5473	-1.2887	1.23e-15	0	0	3.34e-07	0.3008	2.2614	0.8399	1.2256	-0.657846	0.242047	0	0
Mrpl18	20.2062	50.7632	4.1383	0.00439	49.9615	234.964	1.6842	0.0802	0.0848	14.0777	0.2997	0.0073	41.0872	0.1767	-3.5387	1.5453	-0.7625	0	0	0	5.43e-08	1.1621	1.1855	0.2923	2.1393	-0.65737	10.6164	0	0
Pld4	13.3573	6.0727	0.4222	0.15	18.0769	34.6569	5.1774	0.019	0.1184	4.0348	0.7042	0.1532	11.719	0.3432	0.3725	1.5383	-1.0371	0	0	0	9.55e-22	0.28	3.1155	1.7332	0.8904	-0.655704	-0.227154	0	0
Malat1	1.9869	3.6583	25.6647	0.284	4.3376	23.364	86.7255	0.427	7.6971	1.2744	0.3622	4.2789	3.5775	0.1833	-0.8471	1.4892	-0.9824	0	0	0	4.51e-09	9.0386	0.7142	14.1793	0.5641	-0.643774	0.79885	0	0
Pfdn6	13.5021	29.4362	1.7158	0.107	26.9495	399.437	2.3374	0.855	0.0607	9.0981	0.3116	0.006	25.2073	0.0636	-3.3397	1.4702	-2.2927	0	0	0	0.0156	0.504	2.0243	0.1455	3.0025	-0.639069	9.11667	0	0
Dnajc15	18.4054	18.011	0.9592	0.00707	33.2542	97.2319	0.9742	0.742	0.0623	8.7795	0.5202	0.0104	24.1511	0.2538	-2.5855	1.4599	-1.0352	0	0	0	0.0188	0.478	1.8271	0.2182	2.856	-0.636476	4.99038	0	0
Rnf7	16.7722	13.9492	2.1943	0.0119	22.8607	216.761	6.6642	0.0041	0.1747	7.527	0.5487	0.0327	20.6283	0.0986	-2.4167	1.4545	-2.4763	0	0	0	0.00704	1.1888	1.2084	0.6379	1.7468	-0.635113	4.34251	0	0
Prkar1a	19.0908	23.0626	2.4332	0.00455	34.9996	144.02	3.238	0.0434	0.1154	10.3526	0.4505	0.0234	28.1016	0.1942	-2.3029	1.4407	-1.2141	0	0	0	0.0454	1.0858	1.2209	0.6254	1.4432	-0.631601	3.93162	0	0
Cd63	1.257	1.6082	14.8293	0.452	80.2988	1.9334	0.4255	0.0424	9.8767	0.6963	0.4477	0.2633	1.8796	0.9727	-5.2292	1.4327	1.1195	0	0	0	0	6.493	0.7865	0.4056	2.3382	-0.629549	36.5112	0	0
Ubl5	15.136	46.2517	3.8706	0.00179	32.5999	311.486	6.3237	0.0254	0.086	11.3308	0.25	0.0211	29.4255	0.0985	-2.0255	1.3768	-1.3433	0	0	0	0.0369	0.9529	1.1472	0.6119	1.4911	-0.614933	3.07583	0	0
Lyar	28.7679	378.955	4.6159	0.484	76.8519	702.198	0.4037	-1	0.0122	26.6736	0.0712	0.0006	69.0814	0.0982	-4.4016	1.3729	0.4655	0	0	0	0.0142	0.3241	2.3813	0.0314	5.9444	-0.613882	19.3333	0	0
Kif5b	20.6794	72.7432	1.6666	0.164	44.9712	372.978	6.0277	0.0124	0.0231	15.9044	0.2238	0.0165	40.0083	0.1083	-0.485	1.3309	-1.0467	0	0	0	0.00692	0.3556	1.8337	0.6423	1.439	-0.602472	0.4	0	0
Cox7c	18.4175	102.596	8.5857	0.000637	43.1382	271.15	4.11	0.0204	0.0858	15.4615	0.1556	0.0152	36.9714	0.1364	-2.4922	1.2577	-0.1901	0	0	1.35e-20	0.000408	1.2592	1.1021	0.5392	1.5881	-0.581798	4.64474	0	0
Tcp1	23.7886	23.062	1.0137	0.0259	29.602	407.455	2.7067	0.893	0.0513	11.574	0.511	0.0066	27.4796	0.0684	-2.9509	1.2475	-2.9008	0	0	0	0.00241	0.499	1.6653	0.1764	2.6207	-0.578815	6.77273	0	0
Rpl17	2.0144	3.3117	21.4382	0.544	4.2574	9.967	17.9636	0.195	6.9145	1.2412	0.3866	2.0828	2.9414	0.3103	-1.7311	1.2448	-0.3169	0	0	0	0.000605	8.0833	0.7097	5.402	0.6975	-0.578024	2.31981	0	0
Exosc4	23.529	150.316	2.3167	0.334	54.1204	415.135	1.134	0.903	0.0157	20.3047	0.136	0.003	47.7633	0.1145	-2.387	1.2341	-0.2483	0	0	0	0.0394	0.3071	1.9454	0.1256	3.328	-0.574889	4.23333	0	0
Mrpl48	19.4735	215.359	6.2627	0.0284	43.9584	889.288	3.9756	0.789	0.0297	17.7787	0.0841	0.0046	41.7787	0.0469	-2.7055	1.2326	-0.8409	0	0	0	0.0169	0.5091	1.6741	0.1849	2.4001	-0.574455	5.45652	0	0
4921524J17Rik	39.8121	24.7958	0.8658	0.0248	38.8543	342.655	0.6708	1	0.0363	14.9133	0.6118	0.002	34.8286	0.1026	-4.156	1.2237	-2.5761	0	0	0	1.92e-05	0.5103	1.7817	0.0596	4.8956	-0.571809	17.15	0	0
Mrpl42	30.6649	20.0787	1.0094	0.0798	31.2912	257.824	1.491	0.893	0.0573	11.943	0.6117	0.0066	27.5637	0.1267	-3.1243	1.2066	-2.2711	0	0	0	0.00118	0.601	1.6858	0.1673	2.5838	-0.566713	7.68182	0	0
Fth1	2.3965	2.5015	7.9923	0.282	3.5129	16.2142	50.5178	0.527	3.4228	1.2061	0.495	3.8049	2.759	0.2272	0.1527	1.1938	-1.1234	0.000104	0	0	1.21e-16	3.9037	0.801	9.314	0.6571	-0.562849	-0.100423	0	0
Nap1l1	18.0676	30.753	1.2918	0.0297	57.18	43.1286	0.5233	0.0134	0.0477	11.0172	0.3915	0.016	24.132	0.5725	-1.5749	1.1312	0.5481	0	0	0	0.0416	0.4743	1.8953	0.2879	2.7278	-0.543461	1.98125	0	0
Nrros	27.0329	28.2934	1.9387	0.00919	39.8603	127.162	1.7816	0.0865	0.0736	13.6698	0.4905	0.014	29.6826	0.2432	-2.3907	1.1186	-1.0119	0	0	0	0.0003	0.9366	1.2298	0.3939	1.7961	-0.539468	4.25714	0	0
Snrpd3	8.6964	5.826	2.2325	0.00671	10.6379	23.7489	1.5325	1.03e-05	0.4176	3.3155	0.5812	0.0674	6.9873	0.3074	-2.6321	1.0755	-0.9187	0	0	0	4.31e-09	1.2477	1.2057	0.4227	3.9001	-0.525496	5.19585	0	0
Hnrnpk	7.8494	11.0731	9.5542	0.217	21.62	17.6584	3.8744	0.0193	0.931	4.5168	0.4113	0.2261	9.5063	0.5487	-2.0415	1.0736	0.4159	0	0	0	3.35e-06	3.8436	0.679	2.0826	0.86	-0.524862	3.11765	0	0
Pcbp2	12.6503	14.3917	5.5347	0.0652	39.8107	21.5276	1.8174	0.0113	0.3976	6.6427	0.4658	0.0896	13.8554	0.6473	-2.1497	1.0606	0.4748	0	0	0	9.08e-07	2.5422	0.8057	1.1631	1.1206	-0.52057	3.4375	0	0
H2afy	11.5969	8.9572	3.9954	0.0306	26.2503	17.6937	1.9046	0.00762	0.5029	4.9631	0.5528	0.1552	10.352	0.5961	-1.6962	1.0606	0.109	0	0	5.77e-19	8.25e-05	2.1636	0.9213	1.1047	1.27	-0.520566	2.24034	0	0
Slc6a13	30.6802	25.7991	0.8575	0.0264	32.5538	215.594	0.2809	-1	0.035	13.6206	0.5308	0.0014	28.2236	0.1329	-4.6817	1.0511	-1.9974	0	0	0	3.86e-05	0.4341	1.8955	0.0288	5.9955	-0.517404	24	0	0
Gm10036	23.543	232.313	9.1062	0.0134	50.7174	330.627	3.915	0.0415	0.0395	21.1024	0.1011	0.0118	43.6046	0.1361	-1.7449	1.0471	0.4294	0	0	0	0.00725	0.824	1.2575	0.5047	1.6354	-0.516051	2.34746	0	0
Ptpn6	21.0715	188.029	8.8495	0.0156	44.3876	277.967	7.7232	0.00294	0.0486	18.9109	0.1024	0.0289	38.2544	0.1367	-0.7502	1.0164	0.4164	0	0	0	0.0127	0.8996	1.3124	1.0527	1.0633	-0.505654	0.681661	0	0
H2afz	0.9503	2.2922	38.1319	0.353	2.0704	3.9177	13.7233	0.293	17.4337	0.6662	0.2997	3.8085	1.3394	0.3541	-2.1946	1.0074	0.2408	0	0	0	4.12e-06	10.9302	0.9063	4.737	0.8675	-0.502613	3.57758	0	0
Gadd45gip1	14.3814	47.9723	2.1997	0.0125	25.1043	184.422	1.3601	0.351	0.0502	10.8935	0.2403	0.0084	21.9007	0.1348	-2.5791	1.0075	-0.8346	0	0	0	0.00856	0.4901	3.1915	0.1663	3.0343	-0.502596	4.97619	0	0
Rps19	3.2549	4.5035	47.2379	0.443	4.6438	20.3034	68.4652	0.2	11.2785	1.8679	0.429	3.6	3.7188	0.2029	-1.6475	0.9934	-1.0799	0	0	0	1.18e-08	19.948	0.4851	12.8791	0.5374	-0.497714	2.13292	0	0
Tmsb10	1.2686	2.0419	4.116	8.59e-05	2.0677	6.0318	32.153	0.322	2.1401	0.7646	0.391	5.5921	1.5212	0.2647	1.3857	0.9924	-0.5627	0	0	0	0	1.515	1.8785	8.1301	0.8042	-0.49737	-0.617299	0	0
Exosc7	18.0172	49.3355	1.6176	0.261	26.8487	496.595	1.8422	1	0.0349	13.0663	0.2738	0.0038	25.452	0.0517	-3.2113	0.9619	-2.405	0	0	0	0.00168	0.4294	1.773	0.0939	3.3337	-0.48663	8.18421	0	0
2700094K13Rik	16.4188	27.5568	3.2961	0.00171	21.4886	210.62	2.322	0.0575	0.1511	9.9965	0.3586	0.0112	19.4326	0.0925	-3.756	0.959	-1.9549	0	0	0	2.61e-11	1.1336	1.17	0.2057	3.1957	-0.485581	12.4911	0	0
Tmed9	13.9638	18.7959	4.3471	0.0117	18.1147	94.6429	6.508	0.00562	0.2955	7.787	0.4506	0.0734	15.0129	0.1673	-2.0095	0.9471	-1.4293	0	0	0	0.000261	1.8813	0.8942	1.0324	1.4197	-0.481313	3.02589	0	0
Hnrnpu	20.7457	78.5802	5.9479	0.00729	42.9871	115.639	1.8309	0.0163	0.0784	16.2918	0.2129	0.0161	31.1849	0.2697	-2.28	0.9367	0.3408	0	0	0	8.57e-07	1.2352	0.9662	0.4791	1.763	-0.477574	3.86957	0	0
Idh3a	16.3198	50.3746	2.3538	0.0114	26.78	224.446	1.3589	0.994	0.0474	12.1542	0.2476	0.0059	23.2321	0.1154	-3.0044	0.9347	-1.1011	0	0	0	0.0122	0.5511	2.1729	0.1249	3.1073	-0.476836	7.0339	0	0
D1Ertd622e	30.1905	178.569	2.1822	0.428	64.6018	219.327	2.9444	0.0478	0.0125	25.7235	0.1474	0.0137	49.0268	0.2387	0.1277	0.9305	0.696	5.06e-17	0	0	0.00319	0.3104	2.7895	0.665	1.5544	-0.475318	-0.0875912	0	0
Cmtm7	2.7411	3.6927	17.1989	0.279	6.0916	5.7577	2.5109	0.0828	5.244	1.5303	0.4445	0.5123	2.8739	0.5208	-3.3557	0.9092	0.2286	0	0	0	0	7.3636	0.6142	1.273	1.6385	-0.467518	9.23619	0	0
Magoh	57.1125	13.73	0.7167	0.0024	22.5862	150.182	0.9914	0.912	0.0558	10.4416	0.7795	0.007	19.5895	0.1296	-2.985	0.9077	-2.5889	0	0	0	0.000496	0.542	1.8002	0.1223	3.371	-0.46698	6.97143	0	0
Cdk6	22.5856	387.393	6.2047	0.0877	45.8158	356.237	1.237	0.963	0.0163	21.2925	0.0558	0.0034	39.8084	0.1224	-2.2564	0.9027	1.1322	0	0	0	0.00794	0.3503	1.7146	0.1256	3.1012	-0.465125	3.79412	0	0
Atp6v1g1	16.4158	66.7072	7.2868	0.0164	27.3151	213.888	14.6944	0.0127	0.1152	12.9752	0.2087	0.0691	24.1227	0.1158	-0.7368	0.8946	-0.8502	0	0	0	0.00768	1.428	1.0956	1.6558	0.9171	-0.462117	0.667149	0	0
Ngp	1.2376	5.8291	36.8738	0.0102	164.247	1.9104	2.0132	0.00561	6.6675	1.0153	0.1805	1.375	1.8855	0.988	-2.2777	0.8931	2.4522	0	0	0	1.75e-09	6.2651	1.1968	1.978	0.837	-0.461522	3.84909	0	0
Rps27a	3.0332	3.5462	21.0207	0.516	4.1843	13.133	24.0604	0.0807	6.3894	1.6102	0.4704	2.5617	2.9628	0.317	-1.3186	0.8798	-0.5695	0	0	0	3.08e-06	9.7181	0.5548	6.3676	0.6574	-0.456528	1.4942	0	0
Ceacam1	25.4386	418.643	0.8028	0.947	49.0107	359.258	1.953	0.455	0.0019	23.9469	0.0585	0.0059	42.8748	0.1161	1.6027	0.8403	0.9895	0	0	0	0.0432	0.0414	5.1002	0.2197	2.2753	-0.441469	-0.677966	0	0
Pih1d1	43.5331	14.5095	0.5996	0.34	22.9314	124.962	0.6617	0.986	0.0431	10.7851	0.7473	0.0054	19.2663	0.1559	-3.0086	0.837	-2.2611	0	0	0	0.0068	0.4402	2.2589	0.0943	4.0657	-0.440209	6.98148	0	0
Dynlt1c	24.0687	224.824	4.2182	0.204	54.5235	137.023	0.622	0.893	0.0191	21.5763	0.0986	0.0045	37.742	0.2811	-2.0829	0.8067	1.5119	0	0	0	0.0196	0.3955	1.7701	0.1564	2.6951	-0.428321	3.24444	0	0
Nans	33.7562	4.288	0.7525	0.000474	58.7325	6.5791	0.2553	0.405	0.1913	3.4451	0.8262	0.0407	5.9015	0.8983	-2.2343	0.7765	0.1207	0	0	0	0.00124	0.5971	1.723	0.2178	3.1104	-0.416233	3.70025	0	0
Pfdn1	30.7536	266.489	4.0033	0.279	52.9333	396.632	1.193	0.963	0.0154	27.4309	0.1087	0.003	46.3968	0.122	-2.3403	0.7582	0.1671	0	0	1.25e-16	0.00356	0.4157	1.7691	0.1354	2.9336	-0.408776	4.13333	0	0
Rpl26	3.4578	4.0502	11.4784	0.292	4.478	10.9133	12.8454	0.0564	4.1426	1.8002	0.5029	1.9098	2.9958	0.3696	-1.1171	0.7348	-0.4443	0	2.11e-22	0	0.0159	5.4799	0.6453	4.2073	0.7675	-0.399092	1.16913	0	0
Hnrnpr	22.6106	102.811	2.0655	0.0558	32.5647	364.811	1.2934	1	0.0203	18.0885	0.189	0.0036	29.8196	0.0818	-2.4834	0.7212	-1.2083	0	0	0	0.00645	0.3461	1.8657	0.1018	3.5113	-0.393402	4.63889	0	0
Rrm1	20.6011	154.637	3.9226	0.136	32.0525	389.761	0.6844	0.953	0.0264	18.117	0.1182	0.0018	29.4888	0.0792	-3.9081	0.7028	-0.5767	0	0	0	0.000258	0.4527	2.1877	0.041	6.2871	-0.385631	13.6667	0	0
Shisa5	44.2141	30.2671	0.6833	0.0971	34.8154	180.403	5.148	0.0201	0.0229	17.8474	0.5929	0.0307	29.0225	0.1631	0.4261	0.7015	-1.8623	0	0	0	2.5e-05	0.3978	2.0686	0.8156	1.2283	-0.38505	-0.254072	0	0
Polr2g	19.5771	56.5045	3.4954	0.0127	25.3449	201.127	3.7871	0.0787	0.0626	14.2792	0.2638	0.0192	22.4554	0.114	-1.7042	0.6531	-1.2105	0	0	0	0.00298	0.8793	1.3605	0.4249	1.8378	-0.364108	2.26042	0	0
Acap1	18.7157	47.0569	0.7077	0.805	23.3084	197.611	0.5269	0.836	0.0158	13.2904	0.2864	0.0027	20.6614	0.1078	-2.5654	0.6366	-1.4096	0	0	0	0.0495	0.1929	2.4448	0.0417	6.2997	-0.356752	4.85185	0	0
Hpcal1	26.9914	141.41	1.1818	0.642	43.7524	175.814	3.3143	0.0469	0.0083	22.4729	0.1631	0.0185	34.1674	0.2046	1.1479	0.6044	0.3274	0	0	0	1.14e-05	0.1787	2.6832	0.617	1.4049	-0.342271	-0.551351	0	0
Klf2	1.2091	3.7122	26.8333	0.38	1.6885	6.9593	42.6187	0.646	7.6434	0.9031	0.2549	6.5147	1.3479	0.2042	-0.2305	0.5777	-0.32	0	0	0	0.0155	6.5254	0.9786	8.346	0.8801	-0.329995	0.173254	0	0
Rpp21	34.0936	129.999	1.9513	0.53	45.1184	316.149	1.6266	0.0298	0.0156	26.9081	0.2123	0.0051	38.9267	0.1296	-1.6138	0.5327	-0.7122	0	0	0	0.0276	0.4046	1.7996	0.184	2.9124	-0.30875	2.05882	0	0
Puf60	29.7642	186.351	5.4525	0.0597	38.7138	482.735	3.959	0.0765	0.0302	25.5739	0.1392	0.0083	35.7907	0.0756	-1.8596	0.4849	-0.8806	0	0	0	0.00212	0.7384	1.8388	0.2926	2.2709	-0.28546	2.63855	0	0
Spcs3	28.3991	349.569	4.7867	0.37	38.0939	572.42	2.123	0.471	0.0139	26.1147	0.0774	0.0038	35.6401	0.0626	-1.86	0.4486	-0.3065	0	0	0	0.0408	0.353	1.8669	0.1354	2.7177	-0.267266	2.65789	0	0
Hnrnpa1	21.1346	292.822	13.8098	0.00417	32.5646	176.609	1.9547	0.228	0.0516	19.4005	0.0843	0.0113	26.3411	0.1848	-2.1882	0.4412	1.1331	0	0	0	1.6e-07	0.9685	1.4512	0.2888	2.7237	-0.263489	3.56637	0	0
Mcee	23.4334	125.945	2.5653	0.0302	35.2425	100.678	0.5211	0.63	0.0207	19.3335	0.1668	0.0053	26.0026	0.2595	-1.9622	0.4276	0.6379	0	0	0	0.0169	0.3824	1.9837	0.1253	3.5521	-0.256478	2.90566	0	0
Hpgd	1.0307	1.51	10.773	0.477	1.1327	2.5735	9.4659	0.0121	7.5141	0.6062	0.4118	3.9333	0.7773	0.3137	-0.9339	0.3586	-0.3926	0	0	0	0.00421	4.2766	1.0326	2.7953	1.4991	-0.220121	0.910381	0	0
Ndufb3	19.5258	96.2742	4.8405	0.146	25.1642	107.224	1.6972	0.14	0.0542	15.9059	0.1815	0.0168	20.2211	0.1945	-1.6929	0.3463	0.0995	0	0	5.29e-09	0.00164	0.8076	1.3204	0.318	1.771	-0.213401	2.22619	0	0
Btf3	8.661	21.0131	14.8466	0.109	10.6663	26.6093	8.5401	0.019	1.2864	5.9098	0.3624	0.3779	7.4811	0.3052	-1.7673	0.3401	-0.2481	0	1.2e-14	1.13e-08	2.21e-07	4.7781	0.632	2.4942	0.7867	-0.210036	2.40408	0	0
C1d	8.6529	6.4519	2.6418	0.0059	16.8655	6.2673	1.0756	0.00422	0.4597	3.5302	0.5757	0.1911	4.4058	0.6997	-1.2661	0.3196	0.2816	0	4.23e-09	0	0.000364	1.4547	1.0391	0.7309	1.4926	-0.198738	1.40555	0	0
Actg1	1.877	4.3783	12.0123	0.102	2.578	4.9695	17.8872	0.574	3.0204	1.2866	0.3162	4.9441	1.6037	0.398	0.711	0.3179	0.332	0	3.41e-16	0	6.35e-11	3.5862	1.106	6.4795	0.712	-0.19773	-0.38909	0	0
Rpl14	2.9488	6.1269	34.2503	0.61	4.1026	6.6084	14.5062	0.26	6.0676	1.9637	0.3376	3.2669	2.4136	0.4341	-0.8932	0.2976	0.3627	0	0	0	9.33e-11	11.2376	0.5719	5.8139	0.6103	-0.186402	0.857296	0	0
Dek	33.4469	38.7643	2.2734	0.00373	47.2536	42.1084	0.683	0.0581	0.0602	17.7648	0.464	0.0167	21.8296	0.5176	-1.8471	0.2973	0.1577	0	0	0	9.36e-06	1.0446	1.4245	0.3408	2.4837	-0.186206	2.60479	0	0
Dpy30	23.0726	162.862	5.6143	0.0616	26.6563	282.472	1.7215	0.194	0.0357	19.7946	0.1407	0.006	24.0991	0.0909	-2.5635	0.2839	-0.6304	0	0	0	7.43e-06	0.6963	1.5122	0.1434	3.2093	-0.178617	4.95	0	0
Sp100	39.7838	74.4221	1.4421	0.111	35.0715	318.399	2.7465	0.361	0.0196	25.8237	0.3484	0.0091	31.3725	0.0969	-1.102	0.2808	-1.8466	0	2.25e-18	0	0.0499	0.4954	1.7264	0.2577	2.2703	-0.176868	1.15385	0	0
Snrpf	20.9256	12.1701	1.9689	0.0483	33.6538	13.8186	0.9287	0.0162	0.1857	7.3404	0.6248	0.0692	8.8037	0.645	-1.4247	0.2622	0.046	0	3.31e-10	1.97e-11	0.000427	1.1927	1.1094	0.554	1.5876	-0.166214	1.68353	0	0
Tagln2	2.4331	2.0335	6.4339	0.16	2.396	3.0444	3.3367	0.00254	3.7326	1.0831	0.5554	1.1997	1.2983	0.4552	-1.6375	0.2615	-0.2869	0	0	0	3.99e-11	3.4999	0.8511	1.4405	1.8425	-0.165755	2.11128	0	0
Ccr2	20.1565	198.306	4.8998	0.161	32.3008	66.6181	2.8676	0.000867	0.0249	18.1663	0.0935	0.0438	21.5289	0.3273	0.8116	0.245	1.8074	0	0	0	2.99e-07	0.4266	2.1925	0.9171	1.1028	-0.15619	-0.431507	0	0
Glo1	30.9967	322.647	4.1165	0.0765	63.8854	70.4778	0.3723	0.265	0.013	28.232	0.0882	0.0054	33.1106	0.481	-1.2559	0.23	2.4473	0	0	0	0.0407	0.3635	1.7706	0.1712	2.8844	-0.147343	1.40741	0	0
Ubb	8.2882	108.147	464.294	0.955	10.1567	83.5399	161.654	0.607	4.4029	7.6897	0.0722	1.9762	9.0096	0.1125	-1.1558	0.2285	0.64	0	0	0	6.32e-21	33.0947	0.3898	17.5159	0.4076	-0.146499	1.22796	0	0
Anp32a	29.8761	44.5133	2.7035	0.000943	30.4359	62.4134	1.9624	0.00494	0.0617	17.3527	0.4049	0.0328	20.3035	0.3237	-0.9136	0.2266	-0.3229	0	0	0	0.00565	1.0463	1.0651	0.6185	1.5794	-0.145335	0.881098	0	0
Cuta	21.23	87.7479	6.3805	0.00318	27.2118	72.5742	1.97	0.0144	0.0738	16.9359	0.195	0.028	19.691	0.2776	-1.4003	0.2175	0.5098	0	0	0	0.000518	1.18	1.3722	0.529	1.8488	-0.139917	1.63571	0	0
Hnrnpa2b1	25.8271	237.722	29.9037	0.0356	29.7948	259.1	13.6592	0.000866	0.1236	22.9823	0.1037	0.057	26.6131	0.1043	-1.1174	0.2116	0.0087	0	8.66e-14	1e-18	2.13e-05	2.7756	0.8112	1.3985	1.0297	-0.136429	1.16842	0	0
Wdr83os	55.8894	204.926	3.2049	0.016	55.8812	488.223	2.9976	0.31	0.016	43.1968	0.2235	0.0063	49.9078	0.102	-1.3434	0.2083	-1.1318	0	2.94e-21	0	0.00806	0.672	1.4916	0.2968	2.1228	-0.134468	1.53968	0	0
Tubb4b	21.9659	34.3456	2.2133	0.000605	18.8987	78.1025	1.8639	0.0496	0.0682	13.1975	0.3945	0.0248	14.9137	0.1964	-1.4603	0.1764	-1.0058	0	1.41e-15	0	0.000662	0.8534	1.8132	0.3333	3.7104	-0.115075	1.75	0	0
Suclg1	23.5445	196.168	5.2468	0.127	32.8756	88.971	0.6194	0.212	0.0271	20.9583	0.107	0.007	23.5168	0.2735	-1.9562	0.1662	1.3542	0	2.04e-24	0	0.00034	0.554	1.6699	0.1527	3.3519	-0.108795	2.87143	0	0
Oard1	40.2877	141.192	2.2767	0.106	38.6895	390.609	1.9559	0.598	0.0164	31.2203	0.2245	0.005	34.897	0.095	-1.7152	0.1606	-1.2401	0	0	0	0.00737	0.5022	1.8222	0.1745	2.4909	-0.105359	2.28	0	0
Pcnp	28.6677	250.264	3.5423	0.261	32.08	228.551	1.5994	0.858	0.0143	25.6643	0.1044	0.0075	27.9442	0.1195	-0.9377	0.1228	0.1953	0	0	0	0.0445	0.3682	1.7303	0.1827	2.6328	-0.0815876	0.906667	0	0
Rab44	27.2494	181.153	2.3266	0.0985	30.212	169.956	0.4692	0.995	0.0143	23.5908	0.1328	0.0029	25.5441	0.1529	-2.3184	0.1148	0.2033	0	2.89e-26	0	0.0234	0.2926	2.2105	0.0626	4.1433	-0.0764678	3.93103	0	0
Cbx3	23.0166	250.088	3.7058	0.225	24.4451	339.883	0.8808	0.953	0.0149	21.0035	0.0845	0.0026	22.6491	0.0695	-2.5092	0.1088	-0.2828	0	4.23e-06	0	0.000951	0.3086	1.7557	0.0523	4.5608	-0.0726563	4.73077	0	0
C5ar1	13.9474	14.2898	0.3517	0.625	23.2829	12.2189	0.9635	0.0378	0.0263	7.0211	0.4957	0.0893	7.5497	0.6461	1.7613	0.1047	0.3822	0	0.00257	0	6.23e-06	0.1608	3.9337	0.6021	1.5176	-0.070016	-0.705487	0	0
Ifitm2	3.0901	1.8423	5.2089	0.151	2.6022	2.3123	9.5557	0.157	3.2999	1.1212	0.6337	4.6645	1.1963	0.5421	0.4993	0.0935	-0.2252	0	6.37e-05	0	3.5e-06	3.2392	0.8006	5.0393	0.6967	-0.0627769	-0.29255	0	0
2001-09-01	18.9611	105.353	1.6975	0.516	18.5543	222.532	0.3759	1	0.0165	15.9922	0.154	0.0017	17.0383	0.0779	-3.2419	0.0914	-0.9833	0	0.000211	0	0.00888	0.2487	2.4736	0.0205	7.3151	-0.061397	8.70588	0	0
Lyl1	63.8579	953.926	5.5128	0.195	71.3101	599.434	5.437	0.142	0.0059	59.8364	0.0633	0.0092	63.6297	0.1078	0.651	0.0887	0.7686	0	5.87e-19	0	0.0408	0.352	2.1003	0.5738	1.7289	-0.0596152	-0.358696	0	0
H3f3b	3.4441	21.8068	168.632	0.14	4.2774	11.9315	47.0068	0.489	7.8625	2.9656	0.1381	4.1111	3.1363	0.2648	-0.9355	0.0807	0.9394	0	1.76e-07	0	4.82e-12	22.8495	0.5849	12.3417	0.5538	-0.0544272	0.912505	0	0
Tmem248	41.1126	224.658	3.0176	0.0281	41.4232	317.778	1.2552	0.449	0.0135	34.6985	0.1551	0.004	36.6021	0.1157	-1.7505	0.0771	-0.4224	0	4.77e-16	0	0.00339	0.462	1.8374	0.1432	2.6113	-0.0520079	2.375	0	0
Ebna1bp2	20.9572	146.991	4.896	0.0111	20.8064	242.64	1.7244	0.994	0.033	18.0836	0.1283	0.0071	19.059	0.0793	-2.2153	0.0758	-0.6941	0	4.28e-06	0	0.00242	0.5804	1.8297	0.1303	3.0941	-0.0511779	3.64789	0	0
Nxf1	41.2888	779.302	7.5686	0.108	45.3155	452.847	1.7654	0.196	0.0099	39.0924	0.0508	0.0039	41.0531	0.0911	-1.326	0.0706	0.8431	0	2.17e-06	0	0.00788	0.3897	1.7502	0.1555	3.3245	-0.0477601	1.53846	0	0
Cox7b	15.8206	43.6136	3.4121	0.00515	15.3031	50.8807	2.084	0.0305	0.0823	11.5022	0.2722	0.0446	11.6457	0.2409	-0.8843	0.0179	-0.1761	0	1.85e-12	1.31e-26	0.00662	0.9042	1.3702	0.4774	2.601	-0.0123221	0.845291	0	0
Scp2	14.0389	51.3829	13.5362	0.0272	49.9206	15.4063	1.9733	0.00704	0.2873	10.9884	0.2209	0.1377	11.0832	0.7473	-1.0608	0.0124	1.7581	0	0.0176	0	2.31e-06	2.9377	0.8202	1.4366	1.081	-0.00855349	1.08642	0	0
Eif4g2	25.4718	101.503	4.2953	0.000368	25.4353	92.1761	2.1854	0.0416	0.0433	20.1489	0.2005	0.0255	19.8261	0.2164	-0.7611	-0.0233	0.1099	0	5.38e-10	0	0.00874	0.831	1.2795	0.4625	2.0132	0.0162816	0.698039	0	0
Tmem40	53.7428	424.193	3.1349	0.15	50.9925	484.743	0.5212	1	0.0074	47.2197	0.1191	0.0011	45.9954	0.095	-2.771	-0.0379	-0.3256	0	7.8e-05	0	0.000871	0.3481	1.8831	0.0421	5.1235	0.0266179	5.72727	0	0
Mrpl2	51.589	150.321	1.8272	0.00102	40.0289	379.395	1.365	0.782	0.0133	38.1957	0.2636	0.0037	36.0603	0.0974	-1.8603	-0.083	-1.4366	0	5.96e-07	0	0.0375	0.472	1.9476	0.1326	2.7247	0.0592175	2.59459	0	0
Smc2	53.5629	382.009	2.2748	0.328	46.3089	834.77	0.9173	0.685	0.0061	46.7951	0.1218	0.0011	43.843	0.0534	-2.4355	-0.094	-1.1904	0	5.13e-07	0	0.0144	0.2684	2.4462	0.0411	7.3151	0.0673334	4.54545	0	0
Ifi30	17.409	49.952	0.6997	0.909	84.5566	13.4499	0.8	0.0381	0.0142	12.2432	0.2567	0.0649	11.4275	0.8618	2.1925	-0.0995	1.747	0	7.8e-05	0	1.4e-07	0.1505	4.1012	0.6743	1.4234	0.0713804	-0.781202	0	0
Fkbp4	47.5339	594.471	4.276	0.426	44.0258	602.359	1.1743	0.811	0.0073	43.9619	0.074	0.002	40.9881	0.0681	-1.8649	-0.101	-0.1198	0	4.08e-21	0	0.00413	0.314	1.9166	0.0727	4.3612	0.0725528	2.65	0	0
Clns1a	34.822	370.827	5.3243	0.029	32.0263	381.446	2.3082	0.825	0.0146	31.6529	0.0861	0.0063	29.5036	0.079	-1.2043	-0.1014	-0.1249	0	2.62e-14	3.77e-11	0.0399	0.4468	1.8347	0.1774	2.6206	0.0728487	1.31746	0	0
Mcm7	44.1474	60.1736	1.0687	0.202	24.1652	619.449	1.1922	1	0.0188	25.1822	0.4247	0.002	23.1423	0.0435	-3.2167	-0.1219	-3.2864	0	2.33e-21	0	2.39e-05	0.4429	1.7157	0.0417	5.1243	0.0881459	8.4	0	0
Gbe1	31.5809	414.801	4.3687	0.157	28.0167	450.621	0.8388	-1	0.0109	29.2243	0.0714	0.0019	26.2606	0.0592	-2.5505	-0.1543	-0.2693	0	3.61e-15	0	0.000901	0.3108	1.828	0.0422	5.1236	0.112857	4.73684	0	0
Rpf2	33.9499	17.3436	0.6234	0.312	18.443	20.6345	0.31	0.673	0.0384	10.7497	0.6567	0.016	9.6574	0.4764	-1.2595	-0.1546	-0.463	0	1.31e-18	0	0.0361	0.3875	2.1668	0.1355	3.3637	0.113105	1.4	0	0
Otub1	30.4818	313.751	0.8787	1	25.9692	432.728	5.4121	0.00619	0.0031	27.7259	0.0921	0.0132	24.4519	0.0568	2.0831	-0.1813	-0.6964	0	1.37e-12	0	0.0351	0.0756	3.5955	0.3024	2.1415	0.133896	-0.765152	0	0
Cfl1	3.1834	2.434	8.2624	0.129	2.2446	2.5404	8.189	0.021	4.4679	1.3301	0.5932	3.5888	1.1697	0.4804	-0.3161	-0.1854	-0.3041	1.54e-11	2.06e-13	0	0.0363	4.7592	0.6634	3.8309	0.8283	0.137129	0.244957	0	0
Rfc4	34.9074	298.08	3.057	0.187	31.2209	211.659	0.3132	0.997	0.0102	30.9547	0.1059	0.0015	26.9999	0.1302	-2.7552	-0.1972	0.2979	0	2.29e-20	0	0.00575	0.3031	2.2556	0.0306	7.6996	0.146475	5.8	0	0
Brix1	29.794	158.124	2.4926	0.0419	23.1258	319.252	1.6839	0.397	0.0159	24.6414	0.1652	0.0054	21.458	0.0704	-1.5637	-0.1996	-1.2306	0	0	0	0.00989	0.3748	2.0337	0.1043	4.3256	0.148355	1.94444	0	0
Rpl22	37.9058	350.874	17.0393	0.0342	33.5145	262.285	7.6712	0.00391	0.0507	34.1288	0.0996	0.0293	29.621	0.1147	-0.791	-0.2044	0.2048	0	0	0	7.82e-05	1.6621	1.1084	0.8511	1.8377	0.152183	0.730375	0	0
Racgap1	42.6538	454.007	4.1083	0.426	37.7676	323.533	0.2914	1	0.0089	38.6265	0.0896	0.0009	33.5212	0.1116	-3.2898	-0.2045	0.3162	0	0	1.51e-23	0.00132	0.3361	2.1135	0.0209	7.3146	0.152301	8.88889	0	0
Ssb	35.8265	317.878	6.9299	0.00309	33.3203	167.296	1.3628	0.78	0.0217	31.9787	0.103	0.0083	27.6642	0.1683	-1.3799	-0.2091	0.7074	0	0	0	6.72e-05	0.6854	1.4639	0.2151	2.6853	0.15596	1.61446	0	0
Tomm22	23.9043	26.226	2.8462	0.00309	43.6891	14.1245	0.6752	0.0208	0.1195	12.3293	0.4754	0.0522	10.4939	0.7494	-1.1952	-0.2325	0.6565	0	3.81e-24	0	7.3e-05	1.3269	1.232	0.4946	1.7727	0.174902	1.28927	0	0
Mrpl41	35.9119	410.619	4.1595	0.185	33.9435	157.848	0.5713	0.491	0.01	32.7872	0.0838	0.0036	27.4696	0.1813	-1.4703	-0.2553	1.113	0	0	0	0.0169	0.3233	2.0076	0.0889	3.5994	0.193581	1.77778	0	0
Ankrd13a	67.6807	865.483	6.8429	0.0388	57.4325	544.018	1.2217	0.16	0.0079	62.4857	0.0741	0.0023	51.8288	0.0965	-1.7679	-0.2698	0.3808	0	0	0	3.3e-05	0.498	1.5502	0.112	3.5551	0.205617	2.43478	0	0
Zcrb1	51.4247	267.653	3.8094	0.00902	39.8137	355.515	2.7213	0.0293	0.0154	42.9498	0.1662	0.0076	35.5884	0.1032	-1.0111	-0.2712	-0.6873	0	1.28e-24	0	0.00213	0.6057	1.3068	0.2685	1.958	0.206848	1.02632	0	0
Mgst1	2.9667	2.7862	3.6136	0.0186	2.4605	2.3088	6.7613	0.268	1.6839	1.375	0.5474	4.097	1.1299	0.5588	1.2827	-0.2832	0.0296	0	1.36e-09	0.00429	5.88e-09	1.8821	1.1515	3.607	0.7769	0.216922	-0.588992	0	0
Hsdl2	32.3002	328.184	2.6514	0.395	29.2527	139.824	0.3586	1	0.0087	29.3653	0.0874	0.0026	24.1294	0.172	-1.7344	-0.2833	0.9773	0	0	0	0.0155	0.2286	2.0842	0.0522	5.4216	0.216993	2.34615	0	0
H2-D1	3.5847	5.4634	9.7051	0.198	2.4562	6.0129	27.9033	0.364	2.0524	2.0922	0.4217	4.9765	1.7157	0.3031	1.2778	-0.2863	-0.4766	0	1.38e-26	0	2.29e-12	3.8844	0.8413	8.0737	0.7366	0.219444	-0.587582	0	0
Pigk	33.9935	294.972	2.5062	0.581	26.5191	320.708	0.582	1	0.0086	30.2546	0.1067	0.0019	24.4606	0.0779	-2.207	-0.3067	-0.4542	0	0	0	0.0213	0.252	2.3476	0.039	5.1573	0.236871	3.52632	0	0
Tmbim4	52.9291	415.938	4.3911	0.132	42.6833	336.705	2.1833	0.873	0.0107	46.8495	0.1131	0.0066	37.7775	0.1119	-0.6894	-0.3105	-0.0143	0	0	1.12e-06	0.0394	0.4964	1.7157	0.2373	2.34	0.240143	0.621212	0	0
Asah1	27.9793	216.506	5.4062	0.0675	25.8506	87.2925	5.9336	0.02	0.0274	24.6939	0.1141	0.0684	19.5895	0.2293	1.321	-0.3341	1.0063	0	7.95e-19	0	4.92e-07	0.6035	1.8005	1.2882	1.043	0.260568	-0.599415	0	0
Ifnar2	33.9312	565.487	5.9732	0.0361	27.1191	363.317	9.2547	0.0198	0.0108	31.8913	0.0566	0.0259	25.1745	0.0704	1.2616	-0.3412	0.3154	0	0	0	0.00345	0.3296	2.1246	0.6446	1.5753	0.26681	-0.583012	0	0
Srgn	1.6723	3.4798	34.4572	0.446	1.537	2.0635	7.0785	0.103	11.2591	1.0967	0.3512	3.8756	0.862	0.443	-1.5386	-0.3475	0.3351	0	0	0	1.19e-18	11.3529	0.7036	3.0165	1.0285	0.272274	1.90512	0	0
Rbx1	45.4767	112.052	6.0022	0.0136	27.5436	279.356	8.6897	0.000794	0.0576	32.1947	0.2863	0.0324	24.8121	0.0883	-0.8314	-0.3758	-1.697	0	0	0	6.36e-07	1.6958	1.1158	0.6861	1.7941	0.29754	0.777778	0	0
Tceb2	18.2803	152.567	11.7061	0.00555	15.6712	69.7228	4.0447	0.00115	0.0788	16.3105	0.1087	0.0715	12.4852	0.2173	-0.1394	-0.3856	0.9999	5.79e-18	0	0	0.047	1.2675	1.1529	0.7876	1.3075	0.306387	0.102098	0	0
Ndufv2	38.1719	308.866	8.9112	0.0207	28.6363	264.639	5.6028	0.105	0.0293	33.8826	0.11	0.0218	25.8027	0.0986	-0.426	-0.393	-0.158	0	0	7e-23	0.00258	0.9563	1.1698	0.5421	1.8698	0.313142	0.344037	0	0
Nucks1	37.4533	362.327	3.736	0.293	29.3313	202.894	0.7987	1	0.0104	33.69	0.0999	0.0043	25.5401	0.1241	-1.2567	-0.3996	0.3129	0	0	0	0.0106	0.351	2.0273	0.0893	4.0004	0.319102	1.4186	0	0
Rrs1	44.9035	199.294	1.9026	0.339	27.7122	439.982	0.6451	-1	0.0097	35.8787	0.1796	0.0015	25.9203	0.0596	-2.7139	-0.469	-1.5902	0	0	0	0.00224	0.3086	2.1787	0.0313	5.9449	0.384193	5.46667	0	0
Rrp1	57.8635	455.353	4.5096	0.00468	43.3976	230.31	1.0934	0.797	0.0099	51.2242	0.1138	0.0048	36.0928	0.1626	-1.0641	-0.5051	0.5156	0	0	0	0.00785	0.5094	1.6536	0.1676	2.411	0.419236	1.0625	0	0
Rpl7l1	33.4353	306.257	5.8891	0.171	23.627	195.72	2.5209	0.91	0.0205	30.0792	0.0991	0.0132	20.6312	0.1115	-0.6342	-0.5439	0.171	0	0	0	0.00382	0.5888	1.5374	0.2465	2.3467	0.457947	0.55303	0	0
Milr1	35.0772	340.608	2.9163	0.851	27.184	101.624	3.261	0.0298	0.0087	31.7441	0.0934	0.0353	21.4268	0.2122	2.0297	-0.5671	1.1847	0	0	0	0.00422	0.2655	2.4725	0.6726	1.8058	0.481514	-0.753541	0	0
Denr	53.2339	744.751	9.6853	0.00189	38.204	302.735	1.4771	0.353	0.0131	49.5863	0.0667	0.0049	33.4698	0.1107	-1.4128	-0.5671	0.7311	0	0	0	3e-06	0.6506	1.3846	0.1454	2.9904	0.481524	1.67347	0	0
Pim1	32.056	260.173	0.7154	1	25.0643	89.1775	2.0954	0.0706	0.0028	28.4447	0.1122	0.0256	19.0956	0.2379	3.1989	-0.5749	1.0843	0	0	0	0.00234	0.0724	3.7991	0.4492	2.0365	0.489594	-0.890625	0	0
Os9	43.8971	175.365	2.4947	0.0624	24.8705	322.613	2.6012	0.455	0.0143	34.6717	0.2063	0.0086	23.0677	0.0729	-0.7282	-0.5879	-1.5015	0	0	0	0.0137	0.4906	1.5222	0.1977	2.1766	0.503041	0.662791	0	0
Xist	41.0501	330.959	1.0375	0.165	28.7825	156.181	3.6692	0.0236	0.0032	36.4753	0.1103	0.0244	24.184	0.1578	2.9205	-0.5929	0.5168	0	0	0	1.11e-05	0.1071	4.2485	0.5657	1.563	0.508241	-0.868852	0	0
B4galnt1	18.6904	15.7822	2.4177	0.00158	10.4557	10.6026	1.2882	0.0105	0.173	8.2805	0.5556	0.1263	5.2095	0.5001	-0.4539	-0.6686	-0.1517	0	0	1.78e-24	0.000882	1.3061	1.165	0.6322	1.6522	0.5895	0.369755	0	0
Gtf2f2	34.273	292.677	4.1637	0.117	24.1292	99.5706	0.4817	1	0.0143	30.6097	0.1058	0.0049	19.1517	0.1974	-1.5521	-0.6765	0.9001	0	0	0	0.000992	0.4335	1.7536	0.084	3.5534	0.598276	1.91837	0	0
Snx15	47.5148	679.484	4.2126	0.398	29.5772	354.186	1.1604	1	0.0063	44.2935	0.0651	0.0033	27.2452	0.0769	-0.9192	-0.7011	0.2403	0	0	0	0.0171	0.2762	1.9901	0.084	3.9948	0.625736	0.909091	0	0
Prtn3	2.0796	4.4909	44.4565	0.576	1.3027	2.544	11.7175	0.091	10.8568	1.3943	0.3345	5.0667	0.8459	0.3529	-1.0995	-0.7209	0.0775	0	0	0.000253	2.9e-22	14.2818	0.6177	3.9428	1.0288	0.648304	1.14278	0	0
Ncl	335.523	12.9346	0.9733	0.00136	15.4378	16.4537	0.9832	0.0106	0.0814	12.3492	0.9576	0.0628	7.3649	0.4814	-0.3747	-0.7457	-0.9922	0	0	0	0.0108	0.9236	1.4015	0.4387	1.8553	0.676764	0.296178	0	0
Morf4l2	57.2986	327.648	4.4245	0.00171	31.7591	301.02	2.788	0.437	0.0136	48.488	0.1486	0.0094	28.5991	0.0974	-0.5344	-0.7617	-0.6097	0	0	0	0.00309	0.6392	1.369	0.2661	2.0127	0.695438	0.446809	0	0
Rpl4	2.9618	8.0857	29.0054	0.0806	2.19	3.0982	10.6479	0.285	4.2066	2.1218	0.2927	4.0552	1.2514	0.4354	-0.0529	-0.7618	0.5728	0.0115	0	0	4.12e-08	7.9607	0.7197	4.4599	0.8518	0.695541	0.0373348	0	0
Atp5b	22.2958	167.44	18.7427	0.0218	21.2014	26.7354	3.1242	0.0217	0.1179	19.574	0.1238	0.1245	11.526	0.4453	0.0782	-0.764	1.8468	0.0167	0	0	0.00487	2.2188	0.8524	1.3481	1.0257	0.698247	-0.053012	0	0
Ndufv1	32.7093	219.261	3.3543	0.093	27.8071	40.7336	0.538	0.272	0.0156	28.274	0.1331	0.0146	16.3289	0.4119	-0.1039	-0.7921	1.6302	1.1e-22	0	0	0.0455	0.4265	1.7062	0.2087	2.5826	0.731531	0.0684932	0	0
Rpl3	3.4705	14.2754	65.569	0.233	2.6958	4.0565	18.3141	0.27	4.9096	2.7692	0.2046	4.9111	1.5921	0.413	0.0004	-0.7986	1.0135	0.497	0	0	8.58e-10	12.9747	0.5827	7.3432	0.6542	0.739338	-0.000305431	0	0
Scnn1a	35.9178	427.441	3.1481	0.302	19.7682	257.305	0.5069	0.952	0.0075	33.0226	0.0812	0.002	18.268	0.0745	-1.8847	-0.8541	-0.123	0	0	5.62e-11	0.0468	0.2379	2.9437	0.0286	5.9926	0.807675	2.75	0	0
Ccnd3	35.4561	38.8667	1.3421	0.0949	54.0587	11.9304	0.9676	0.00156	0.0383	18.3605	0.4728	0.0868	9.648	0.8197	1.1794	-0.9283	0.7938	0	0	0	0.00909	0.6211	2.182	0.7865	1.3238	0.903037	-0.558756	0	0
Gpi1	33.6984	35.4047	6.3049	0.062	10.9704	48.7112	9.4233	0.00286	0.1919	17.1526	0.4866	0.1999	8.8974	0.1873	0.0586	-0.947	-1.3776	3.3e-13	0	0	9.68e-07	3.0498	0.6433	1.6986	1.2286	0.927822	-0.04002	0	0
Sap18	65.0439	239.04	6.0629	0.00154	28.5933	321.896	7.1746	0.00749	0.0263	50.7935	0.2094	0.0224	26.1061	0.0824	-0.2321	-0.9603	-1.3459	7.22e-19	0	0	8.15e-05	1.246	0.9694	0.5711	1.3878	0.945656	0.174107	0	0
Stip1	47.3384	297.448	2.0686	0.0806	22.6002	259.499	0.8202	1	0.007	40.6617	0.137	0.0033	20.69	0.0852	-1.0997	-0.9747	-0.6845	0	0	0	0.0214	0.2742	2.1265	0.0619	4.1441	0.965283	1.12121	0	0
Man2b1	35.8457	510.051	6.0388	0.0182	20.5579	97.6419	5.2776	0.0061	0.0122	33.3766	0.0672	0.0556	16.8961	0.1722	2.1883	-0.9822	1.3579	0	0	0	0.00108	0.3931	1.8464	0.8802	1.5827	0.975403	-0.780576	0	0
Srm	31.6075	334.348	5.2587	0.0613	16.4032	146.627	1.358	0.207	0.0159	28.7902	0.0875	0.0097	14.1403	0.1296	-0.7053	-1.0258	0.5663	0	0	0	0.00274	0.4512	1.8659	0.1249	3.957	1.03604	0.639175	0	0
Rps27	14.0166	5.8882	7.2815	0.163	4.8631	3.6118	10.6792	0.309	1.6693	4.0587	0.6806	3.8309	1.9801	0.5951	1.1985	-1.0355	-0.1937	0	0	0	0.00166	4.9045	0.5588	6.1467	0.5369	1.04974	-0.564254	0	0
Mrpl36	27.5065	177.855	4.5651	0.0265	172.243	12.3991	0.2333	0.38	0.0256	23.5873	0.1372	0.0199	11.4702	0.9262	-0.3658	-1.0401	2.7553	0	0	0	0.00555	0.5902	2.0028	0.2084	2.6861	1.0564	0.286432	0	0
Dnajc19	51.9153	17.9657	0.8788	0.00635	99.2224	7.1408	0.2982	0.411	0.0636	13.2179	0.7266	0.0481	6.3768	0.8883	-0.4028	-1.0516	0.29	4.95e-06	0	0	0.00416	0.6294	1.4544	0.259	2.1846	1.07281	0.322245	0	0
Mdh1	23.4869	85.3323	4.1607	0.00122	45.7559	11.7443	0.6898	0.00892	0.0496	18.2314	0.2181	0.0786	8.5431	0.7811	0.6643	-1.0936	1.8408	5.45e-27	0	0	0.0386	0.8758	1.2606	0.5171	1.6561	1.13405	-0.368957	0	0
Gm10094	47.4349	278.115	2.7161	0.0239	21.438	165.234	1.1981	0.971	0.0098	40.3237	0.1466	0.0093	18.5956	0.1452	-0.0764	-1.1167	-0.0143	3.22e-18	0	7.25e-24	0.0293	0.3865	1.7591	0.1537	2.5093	1.16845	0.0537634	0	0
Crip1	2.8014	3.8687	2.6882	0.000149	1.0057	2.6603	20.3715	0.0824	0.7368	1.6058	0.4219	8.2358	0.7199	0.2869	3.4826	-1.1574	-0.5567	0	0	0	1.12e-18	1.0946	2.2227	5.5042	1.0947	1.23059	-0.910537	0	0
Cops6	18.6818	97.9854	4.5019	0.0308	15.7011	12.747	0.8946	0.132	0.0463	15.5442	0.1667	0.0846	6.793	0.5562	0.8687	-1.1943	1.738	0	0	0	0.0366	0.7223	1.3198	0.4754	1.8491	1.28827	-0.452719	0	0
Anapc5	61.2843	341.257	3.9447	0.0443	23.0155	357.141	3.7963	0.375	0.0116	51.461	0.1561	0.0106	21.4904	0.0622	-0.1393	-1.2598	-1.3279	1.8e-11	0	0	0.00792	0.5858	1.6014	0.2268	2.4057	1.3946	0.0943396	0	0
F10	31.0598	22.4565	0.9759	0.000138	11.9451	7.4437	1.8955	0.0104	0.0434	11.3477	0.5382	0.2679	4.5101	0.6097	2.6262	-1.3312	0.1798	0	0	0	5.25e-06	0.465	1.8975	1.1367	1.2888	1.51606	-0.837999	0	0
Fkbp3	34.3045	251.596	5.9173	0.0124	29.0116	19.9882	0.3029	0.878	0.024	29.5296	0.1367	0.0159	11.6111	0.5853	-0.5919	-1.3467	2.0981	0	0	0	1.39e-05	0.7048	1.4426	0.1665	3.0386	1.54322	0.509434	0	0
Hgsnat	32.9111	454.137	2.4032	0.777	59.6546	14.5713	0.4902	0.0627	0.0057	30.4458	0.0765	0.0383	11.6343	0.8052	2.7528	-1.3879	3.3958	0	0	0	0.036	0.1645	2.897	0.3857	1.963	1.6169	-0.851175	0	0
Mphosph6	19.3153	129.875	2.658	0.225	9.1584	20.3997	1.1604	0.00012	0.0211	16.4484	0.1452	0.0638	6.2031	0.3265	1.5958	-1.4069	1.1687	0	0	0	0.0124	0.3386	1.8141	0.3553	6.2742	1.65164	-0.669279	0	0
Tln1	50.1591	97.8447	1.001	0.184	294.59	12.9436	0.5961	0.0657	0.0114	32.9244	0.3406	0.0475	12.3584	0.9555	2.0555	-1.4137	1.4881	0	0	0	0.00131	0.3303	2.846	0.5662	1.5352	1.66413	-0.76	0	0
Snrpd2	52.1404	295.923	4.8928	0.000753	18.3998	163.633	3.9156	0.00573	0.0165	43.9463	0.1529	0.0244	16.4199	0.1041	0.5621	-1.4203	-0.5548	0	0	0	0.00766	0.7268	1.4608	0.3837	2.2227	1.6764	-0.32377	0	0
1700097N02Rik	30.8265	402.3	6.2753	0.0147	39.5667	14.5844	0.243	0.499	0.0159	28.5523	0.0742	0.0172	10.5363	0.7251	0.113	-1.4382	3.288	3.71e-08	0	0	0.0166	0.4455	2.159	0.168	3.9852	1.7099	-0.0755814	0	0
Tm7sf3	46.6808	153.23	3.1777	0.0388	31.3832	19.8019	0.3117	0.676	0.021	34.9524	0.2424	0.0163	12.0649	0.6131	-0.3595	-1.5346	1.3388	0	0	0	1.48e-05	0.7182	1.406	0.1851	2.8026	1.89703	0.288344	0	0
Ier5	47.8247	312.217	2.6447	0.0207	23.2502	36.8701	2.4493	0.0507	0.0084	40.6391	0.1395	0.0669	13.9177	0.3875	2.9917	-1.546	1.4736	0	0	0	1.39e-06	0.3324	1.9142	0.9004	1.2299	1.91996	-0.874439	0	0
Npc2	19.0377	55.1523	6.7463	0.0221	7.2559	13.0354	6.9792	0.114	0.1294	13.9914	0.2597	1.2678	4.4394	0.4389	3.2929	-1.6561	0.7568	0	0	0	2.72e-06	1.6812	0.984	2.7114	0.796	2.15164	-0.897933	0	0
Cox6b2	14.7195	186.523	8.4754	0.0672	69.0354	4.4707	0.453	0.00846	0.0465	13.4366	0.083	0.1874	4.1109	0.9392	2.0097	-1.7086	3.5008	0	0	0	0.0104	0.611	1.6064	0.413	2.7919	2.26853	-0.751868	0	0
Grpel1	31.0882	212.42	4.9847	0.0103	25.3322	12.1648	0.544	0.339	0.0239	27.043	0.1272	0.0702	7.6786	0.7079	1.554	-1.8163	2.4763	0	0	0	0.0303	0.6269	1.4465	0.3651	2.0577	2.52187	-0.659544	0	0
Gm1604a	63.8825	525.033	3.5399	0.0432	16.423	574.526	7.8477	0.00145	0.0068	56.7417	0.1093	0.0124	15.816	0.0288	0.8788	-1.843	-1.9265	0	0	0	4.89e-06	0.3797	1.7033	0	nan	2.58761	-0.451613	0	0
Usp5	56.0665	226.559	2.6285	0.0981	14.48	78.8018	0.4598	0.995	0.0118	44.8772	0.1991	0.0059	11.9459	0.1705	-0.9974	-1.9095	-0.2238	0	0	0	1.37e-05	0.519	1.6229	0.0627	4.8037	2.7567	1	0	0
Adrb2	43.3761	493.121	3.1539	0.415	9.3491	29.5565	4.196	0.00194	0.0065	39.8405	0.0806	0.2449	6.645	0.3218	5.228	-2.5839	1.997	0	0	0	1.46e-06	0.2564	2.0561	1.096	1.6717	4.99556	-0.973459	0	0
Tmem147	15.3189	55.9103	3.8139	0.00247	105.267	2.0975	0.3985	0.324	0.0694	11.9699	0.2164	0.3098	1.9919	0.9727	2.1575	-2.5872	2.1681	0	0	0	0.00359	0.8146	1.6227	0.3757	2.206	5.00929	-0.775985	0	0
Rpl27-ps3	33.6071	254.438	9.6145	0.00348	11.5576	8.7371	1.3085	0.0119	0.0381	29.6299	0.1169	0.2201	4.8164	0.5944	2.5314	-2.621	2.3467	0	0	0	0.0414	1.1189	1.0741	0.7537	1.3514	5.15188	-0.826897	0	0
Ptp4a2	30.9331	361.241	3.1469	0.709	10.1515	7.5023	0.9369	0.0605	0.0088	28.4583	0.0796	0.1987	3.9812	0.6199	4.4994	-2.8376	2.9617	0	0	0	0.00349	0.2455	2.6368	0.5419	1.6838	6.14817	-0.955712	0	0
Chil3	8.7819	102.379	865.763	0.698	1.3304	2.3303	127.483	0.543	8.6285	8.0741	0.0799	59.0688	0.8359	0.3749	2.7752	-3.2719	2.2296	0	0	0	2.36e-08	68.4609	0.3708	47.3961	0.6122	8.65917	-0.853925	0	0
Ypel3	36.649	283.333	4.3718	0.24	5.4282	7.5375	4.189	0.0238	0.0155	32.3233	0.115	0.6639	3.0595	0.4383	5.4168	-3.4012	1.9301	0	0	0	7.79e-10	0.5008	1.6416	1.7579	1.1938	9.5649	-0.976653	0	0
Trp53	52.3976	314.688	2.3405	0.229	16.6306	6.0569	0.1986	0.635	0.0075	44.8159	0.1441	0.0509	4.064	0.747	2.7616	-3.463	2.3743	0	0	0	0.0272	0.3351	1.9257	0.1349	3.5222	10.0275	-0.852652	0	0
Wfdc17	12.1758	22.0707	0.7774	0.000153	0.9515	2.6449	18.8924	0.147	0.0372	7.7339	0.3628	7.4555	0.6943	0.2703	7.6453	-3.4776	-0.4242	0	0	0	0	0.2646	4.6668	4.8444	1.1995	10.1391	-0.99501	0	0
Cyp4f18	31.8326	425.766	4.0926	0.0503	6.611	2.9365	2.5431	0.00744	0.0095	29.4446	0.0717	0.9492	1.9248	0.6718	6.6432	-3.9353	3.2271	0	0	0	1.77e-15	0.2693	2.8765	1.6561	1.0469	14.2975	-0.989992	0	0
Ccl6	20.5831	16.3315	0.3705	0.225	0.7809	1.8536	17.5029	0.138	0.0247	8.7671	0.5335	9.7977	0.5455	0.3014	8.6302	-4.0064	-0.8239	0	0	0	1.12e-25	0.177	6.2682	5.0607	1.1897	15.0717	-0.997479	0	0
Evi2a	45.421	278.439	1.0234	0.859	17.2375	2.8302	0.5716	0.01	0.0036	38.5476	0.1431	0.2885	2.3028	0.8651	6.3116	-4.0652	2.5956	0	0	0	0.0107	0.1319	2.9367	0.4802	2.011	15.7394	-0.987522	0	0
Ifitm3	24.7463	367.962	2.8257	0.0699	1.6426	1.115	4.8619	0.0666	0.0077	23.103	0.0648	4.8459	0.6531	0.6009	9.2907	-5.1446	3.212	0	0	0	2.5e-25	0.1766	2.8873	2.8616	0.9269	34.3744	-0.998411	0	0

## Sheet: Kat2a_Ac_targets
0610030E20Rik
0610039K10Rik
1110001A16Rik
1110001J03Rik
1110004F10Rik
1110008F13Rik
1110008J03Rik
1110008P14Rik
1110012L19Rik
1110018G07Rik
1110032A03Rik
1110057K04Rik
1700055D18Rik
1700120B22Rik
1810009A15Rik
1810013L24Rik
2010107E04Rik
2010109A12Rik
2210408I21Rik
2310011J03Rik
2310033P09Rik
2310044G17Rik
2310047M10Rik
2410015M20Rik
2410016O06Rik
2600006K01Rik
2610001J05Rik
2610021A01Rik
2610301G19Rik
2610507B11Rik
2810407C02Rik
2810428I15Rik
4632404H12Rik
4921507P07Rik
4921536K21Rik
4930503L19Rik
4930519P11Rik
4930570N19Rik
4931406P16Rik
4931428F04Rik
4933440N22Rik
5033411D12Rik
5830415F09Rik
6030458C11Rik
8430427H17Rik
9130011E15Rik
9130401M01Rik
9430023L20Rik
A430005L14Rik
A530088E08Rik
A630007B06Rik
A730061H03Rik
A830005F24Rik
AA386476
Aasdhppt
Abcb7
Abcc1
Abcc10
Abcd1
Abcd4
Abcf2
Abhd13
Abhd16a
Abhd5
Abi1
Abl2
Abt1
Acads
Acadsb
Acat2
Acbd5
Acbd6
Acly
Aco1
Aco2
Acp2
Actl6a
Actn3
Actn4
Actr10
Actr3
Acy1
Adam10
Adam17
Adck1
Adk
Adnp
Ado
Adprm
Afg3l1
Afmid
Aggf1
Agpat1
Agps
Agxt2l2
Ahcy
AI314180
AI413582
AI597479
AI987944
Akap10
Akap8
Alas1
Aldh3a2
Alg1
Alg10b
Alg14
Alkbh1
Alyref
Ambra1
Amdhd1
Amn1
Anapc2
Ankle2
Ankra2
Ankrd16
Ankrd17
Ankrd32
Ankrd42
Ankrd52
Ankzf1
Anp32e
Antxr2
Ap1g2
Ap1s3
Ap2m1
Ap3b1
Ap3m1
Ap4e1
Ap5m1
Ap5z1
Apbb3
Apobr
Aptx
Arf1
Arfgap1
Arfgap2
Arfgef1
Arhgap1
Arhgap17
Arhgap21
Arhgap24
Arhgap4
Arhgdia
Arhgef12
Arid3a
Arl4c
Arl8b
Armc7
Armc8
Armcx5
Arpc3
Arpc4
Arpc5l
Arpp19
Asb3
Ascc1
Ascc2
Ascc3
Asxl2
Atf5
Atf6
Atf6b
Atg13
Atg3
Atg4a
Atg7
Atg9a
Atic
Atmin
Atox1
Atp13a3
Atp2b1
Atp2b4
Atp5e
Atp5l
Atp5o
Atp6v1a
Atp6v1c1
Atp6v1d
Atp6v1e1
Atp8a1
Atrip
Aunip
Aup1
Aven
AW554918
Azin1
B3galt6
B930094E09Rik
Bag6
Banf1
Bap1
Baz1b
Baz2a
Baz2b
Bbip1
Bbs2
BC003965
BC024978
BC025920
BC028528
BC029214
BC030307
BC035044
BC049715
BC049762
Bckdhb
Bcl2l11
Bend3
Bet1
Bicd2
Birc3
Blm
Bloc1s3
Bms1
Bnip3l
Bre
Brpf1
Bsdc1
Bsg
Btaf1
Btbd7
Btbd9
Btf3l4
Bysl
Bzw1
C030006K11Rik
C030034I22Rik
C030039L03Rik
C1galt1c1
C330006D17Rik
C330007P06Rik
C330018D20Rik
C730034F03Rik
C78339
C920021L13Rik
Cab39l
Calm1
Calm2
Camk2g
Camkk2
Canx
Capn10
Capns1
Capza1
Carkd
Casp2
Casp8
Cbfa2t3
Cblb
Cbr4
Ccar1
Ccdc103
Ccdc117
Ccdc12
Ccdc126
Ccdc127
Ccdc130
Ccdc134
Ccdc138
Ccdc142
Ccdc146
Ccdc15
Ccdc151
Ccdc157
Ccdc174
Ccdc25
Ccdc28a
Ccdc38
Ccdc47
Ccdc53
Ccdc84
Ccdc88c
Ccdc91
Ccdc97
Ccl25
Ccp110
Cct4
Cct5
Cct6a
Cct7
Ccz1
Cd47
Cd52
Cd79b
Cdan1
Cdc23
Cdc25c
Cdc26
Cdc42bpb
Cdca5
Cdip1
Cdipt
Cdk11b
Cdk17
Cdk19
Cdk2ap2
Cdk5rap1
Cdk5rap3
Cdk7
Cdk8
Cdkl5
Cdkn2aipnl
Cdkn2c
Cdt1
Cdv3
Cebpz
Cenpa
Cenpn
Cenpt
Cenpw
Cep135
Cep152
Cep350
Cep63
Cep72
Cep95
Cept1
Cers5
Cetn3
Chchd1
Chchd5
Chd1
Chd7
Chek2
Chkb
Chm
Chmp2a
Chpf2
Chrac1
Chtf8
Cinp
Cirh1a
Cisd2
Ckap4
Cklf
Cks2
Clcn6
Cldn12
Cldn25
Clic1
Clic4
Clk2
Cln5
Clptm1l
Cmas
Cmc2
Cmip
Cmpk1
Cnbd2
Cnbp
Cnnm3
Cnnm4
Cnot1
Cnot10
Cnot2
Cnppd1
Cnst
Cntrob
Coa5
Coasy
Commd6
Commd7
Commd9
Copa
Cope
Copg1
Copg2
Cops2
Cops3
Cops5
Cops7a
Cops7b
Cops8
Coq5
Coq7
Coro1a
Coro1c
Coro6
Cox14
Cox16
Cox17
Cox18
Cox19
Cox5a
Cox7a2
Cpsf3
Cr1l
Cramp1l
Crcp
Creb1
Creb3
Crebbp
Crebzf
Crem
Crk
Crlf3
Crnkl1
Crtc2
Cry1
Cryz
Csde1
Csf2rb
Csgalnact2
Csnk1d
Csnk1g2
Csnk2a2
Cspp1
Csrnp1
Cstb
Cstf2
Cstf2t
Ctcf
Ctdnep1
Ctdsp2
Ctns
Ctsh
Cuedc2
Cul4a
Cux1
Cwc25
Cwc27
Cxxc1
Cyb561d1
Cyb5b
Cyb5d2
Cyc1
Cyp39a1
D10Wsu102e
D10Wsu52e
D14Abb1e
D17H6S53E
D19Bwg1357e
D19Ertd737e
D2hgdh
D630036H23Rik
Dad1
Daglb
Dapp1
Dazap2
Dbr1
Dcaf11
Dcaf12
Dcaf5
Dcaf7
Dcaf8
Dcakd
Dclre1a
Dcp1a
Dcp2
Ddb1
Ddi2
Ddit3
Ddrgk1
Ddx39
Ddx42
Ddx54
Ddx55
Ddx56
Ddx6
Deaf1
Dedd
Def8
Dennd1b
Derl1
Dgat1
Dguok
Dhdds
Dhdh
Dhrs3
Dhrs7b
Dhx37
Dhx40
Dhx57
Dis3l
Dlst
Dmtf1
Dnajb1
Dnajb4
Dnajb5
Dnajb9
Dnajc16
Dnajc3
Dnajc4
Dnajc5
Dnhd1
Dnttip1
Dnttip2
Dom3z
Donson
Dpcd
Dph3
Dpm1
Dpp8
Dpy19l4
Dr1
Dram1
Dram2
Drg1
Drosha
Dscc1
Dstyk
Dtwd1
Dtymk
Dus3l
Dusp1
Dusp11
Dusp16
Dusp18
Dusp2
Dvl2
Dync2h1
Dynll2
Dyrk1a
Dzank1
E130304I02Rik
E130309D02Rik
E4f1
Eapp
Ebag9
Echdc1
Ecsit
Edc3
Edem2
Edem3
Eef1b2
Efcab14
Efr3a
Eftud2
Egln1
Ehbp1l1
Ehhadh
Eif1a
Eif1ad
Eif2ak2
Eif2b1
Eif2d
Eif2s1
Eif2s3x
Eif3d
Eif3i
Eif3l
Eif4a1
Eif4ebp1
Eif4ebp2
Eif5
Elac1
Elavl1
Elf2
Ell
Elmsan1
Elovl1
Elp2
Elp4
Emc1
Emc10
Eme1
Eml3
Endog
Endov
Enoph1
Enpp4
Ensa
Eny2
Ep400
Epg5
Epn1
Eprs
Eral1
Erap1
Erbb2ip
Ercc3
Ercc4
Erf
Ergic1
Ergic2
Eri3
Erlec1
Erlin2
Erp29
Etaa1
Etohi1
Etv3
Ewsr1
Exoc1
Exoc4
Exosc10
Extl3
Eya3
Ezr
Fadd
Fam105b
Fam117b
Fam120a
Fam122a
Fam134a
Fam13b
Fam173a
Fam173b
Fam175b
Fam185a
Fam193a
Fam195b
Fam203a
Fam20b
Fam216a
Fam220a
Fam227b
Fam53a
Fam64a
Fam69a
Fam71e1
Fam83g
Fam96b
Fam98a
Far1
Fars2
Farsa
Farsb
Fas
Fastk
Fbl
Fbrsl1
Fbxl20
Fbxo18
Fbxo30
Fbxo33
Fbxo42
Fbxo6
Fbxo7
Fbxw2
Fbxw4
Fcf1
Fdx1l
Fdxr
Fem1b
Fkbp15
Fkbp1a
Fkbp2
Fkbp7
Fkbp8
Fkbpl
Flot1
Fnbp1
Foxo3
Foxo4
Fpgt
Ftsj1
Ftsj3
Fubp1
Fuz
Fxr2
Fyco1
Gaa
Gabbr1
Gadd45a
Gadd45g
Galc
Galk2
Galt
Ganab
Ganc
Gart
Gatad2a
Gba
Gbf1
Gcfc2
Gdi1
Gemin8
Gfpt1
Ggct
Ggnbp1
Ggnbp2
Gin1
Ginm1
Glb1l
Gle1
Glg1
Gltp
Glud1
Gm10615
Gm10762
Gm10766
Gm12500
Gm16286
Gm20390
Gm20503
Gm20517
Gm21985
Gm21987
Gm21988
Gm5447
Gm561
Gm9776
Gm9900
Gm9958
Gmds
Gnai2
Gnaq
Gnb1
Gnb2l1
Gnl3
Golga1
Golga7
Golgb1
Gopc
Gosr1
Gosr2
Gpaa1
Gpatch2l
Gpbp1l1
Gps2
Gramd1a
Grb2
Gripap1
Grk4
Grpel2
Grwd1
Gsdmd
Gsk3a
Gsk3b
Gstcd
Gstm4
Gstz1
Gtf2a2
Gtf2b
Gtf2h1
Gtf2h3
Gtf2ird2
Gtf3c6
Gtpbp4
Gtpbp8
H1f0
H2-Ke2
H2-Ke6
H2-Q4
H2afv
H3f3a
H6pd
Harbi1
Haus2
Haus8
Hbs1l
Hcfc1r1
Hdac10
Hdac2
Heatr6
Heg1
Helb
Hemk1
Herc4
Herpud2
Hiatl1
Hif1an
Hist1h4h
Hist2h2ab
Hist2h4
Hivep1
Hjurp
Hmbox1
Hmbs
Hmg20a
Hmgb1
Hmgb2
Hmgcr
Hmgxb3
Hnrnpa0
Hnrnpab
Hnrnph3
Hnrnpul1
Hnrnpul2
Hook3
Hoxa7
Hprt
Hps5
Hs6st1
Hscb
Hsd17b4
Hsp90aa1
Hsp90ab1
Hsp90b1
Hspa4
Hspd1
Hspe1
Hyal3
Iars2
Iba57
Icam5
Icmt
Ict1
Idh1
Idh3b
Iffo1
Ifnar1
Ift52
Igf2bp3
Ighmbp2
Igsf9
Ikbke
Il17ra
Il4i1
Immp1l
Immp2l
Immt
Ing4
Ino80b
Ino80e
Ints12
Ints3
Ints9
Ipo13
Irak1
Irf2bp1
Irf2bpl
Isg20l2
Isoc1
Isy1
Itfg2
Itgav
Itgb1bp1
Itm2b
Itpkc
Itpripl1
Ivd
Iws1
Izumo4
Jdp2
Kat5
Katna1
Kbtbd2
Kbtbd3
Kctd11
Kctd5
Kdelr2
Kdm3a
Kdm4a
Kdm4d
Kdm6a
Kdm8
Kif2c
Kif3b
Kif9
Klc1
Klf13
Klhl24
Klhl8
Klhl9
Knstrn
Kpna6
Kptn
Kxd1
Lace1
Lactb2
Lamtor2
Lamtor3
Lclat1
Lcmt2
Lcorl
Ldlr
Leprotl1
Letm1
Lgals1
Lima1
Litaf
Lmo4
Lnpep
Lonp1
Lonp2
Lpcat4
Lrrc56
Lrrc57
Lrrc58
Lrrc59
Lrrc8a
Lrrc8c
Lrrfip2
Lrriq3
Lrsam1
Lrwd1
Lsg1
Lsm10
Lsm14a
Lsm2
Lsm3
Lsm4
Lss
Luc7l
Luc7l3
Lyrm1
Lyrm2
Lyrm4
Lysmd1
Lyst
Lztr1
Maea
Magohb
Malsu1
Malt1
Man1b1
Manba
Manbal
Map10
Map2k5
Map2k7
Map4k4
Map7d1
Mapk1ip1
Mapk6
Mapk8
2006-03-01
Mark2
Matr3
Max
Mbtd1
Mcm2
Mcm3ap
Mdfic
Mdm4
Mdp1
Med18
Med22
Med24
Med27
Med29
Meiob
Meis3
Memo1
Mepce
Mettl16
Mettl23
Mettl25
Mettl5
Mex3c
Mfap1b
Mfn2
Mfsd10
Mfsd2a
Mga
Mgat2
Mgme1
Mib2
Micall1
Mier1
Mina
Mink1
Mipol1
Mis18bp1
Mki67
Mki67ip
Mkl2
Mmgt1
Mnd1
Mns1
Mob1a
Mob3a
Mocs3
Mogs
Mon1b
Mospd1
Mppe1
Mpz
Mrm1
Mrpl12
Mrpl13
Mrpl15
Mrpl17
Mrpl21
Mrpl27
Mrpl4
Mrpl47
Mrpl51
Mrpl53
Mrps10
Mrps12
Mrps16
Mrps18a
Mrps18b
Mrps21
Mrps23
Mrps34
Mrps35
Mrrf
Mrs2
Mrto4
Msh5
Msrb1
Mta2
Mtbp
Mtch2
Mtf2
Mtfr1l
Mtfr2
Mtg1
Mtif2
Mtif3
Mtmr1
Mtmr10
Mtmr14
Mtmr4
Mtmr9
Mtpap
Mtpn
Mtrf1
Mttp
Muc1
Mul1
Mxd4
Myd88
Myl12b
Myl6
Myl6b
Myo5a
Mysm1
Mzf1
N4bp2
Naa15
Naa38
Naa50
Nap1l4
Napa
Napg
Narfl
Ncapd2
Nck1
Ncor2
Ncstn
Ndufa4
Ndufaf1
Ndufaf7
Ndufb10
Ndufb2
Ndufc2
Ndufs2
Ndufs4
Ndufs6
Ndufs8
Necap2
Nedd1
Nek1
Nek4
Nelfa
Nelfb
Nelfcd
Nf1
Nfatc3
Nfe2l1
Nfe2l2
Nfkbia
Nfkbie
Ngrn
Nhlrc3
Nhp2
Ninj1
Nit1
Nkiras2
Nlrx1
Nmd3
Nme1
Nod2
Nol10
Nol6
Nol7
Nom1
Nop14
Nosip
Nostrin
Notch2
Nploc4
Nr1d2
Nr3c1
Nr4a1
Nr4a3
Nrbf2
Nrbp1
Nrde2
Nsmce1
Nsun3
Nsun6
Nt5c3
Nt5dc1
Nub1
Nudcd3
Nufip2
Nup107
Nup133
Nup98
Nupl2
Nutf2
Ofd1
Ogfod2
Ogfr
Opa3
Optn
Orai3
Orc5
Osbpl2
Ovca2
Oxnad1
Oxsr1
Pa2g4
Pacrg
Pacs2
Paf1
Pald1
Pam16
Pan3
Panx1
Park7
Parl
Parn
Pask
Patl1
Pbdc1
Pbrm1
Pcbp1
Pccb
Pced1a
Pcif1
Pcyox1l
Pcyt2
Pdcd5
Pdcd6ip
Pdcd7
Pdcl
Pdcl3
Pde3b
Pde6d
Pdf
Pdlim5
Pds5a
Pdxdc1
Pdzd8
Pelp1
Per2
Pes1
Pex11b
Pex13
Pex2
Pfas
Pfdn2
Pfkfb3
Pfkp
Pfn2
Pgap2
Pggt1b
Pgls
Phactr4
Phf2
Phf5a
Phf7
Phkb
Phlda1
Phlpp2
Phospho2
Pick1
Pigb
Pigg
Pigo
Pigt
Pigu
Pik3c2a
Pik3c2b
Pik3cd
Pik3r2
Pik3r4
Pik3r6
Pip4k2c
Pitpna
Pitpnb
Pitpnm1
Pkm
Pla2g15
Plbd2
Plcl2
Plekha2
Plekhf2
Plekhg2
Plekhm1
Plk4
Plod3
Pmaip1
Pmf1
Pmm2
Pnkp
Pnpla2
Pnpla7
Poc1a
Poc1b
Poll
Polm
Polr2k
Polr2m
Polr3c
Polr3f
Pomp
Pop4
Pot1a
Pot1b
Ppcdc
Ppcs
Ppif
Ppig
Ppil2
Ppm1a
Ppm1d
Ppm1j
Ppm1l
Ppm1m
Ppp1r10
Ppp1r11
Ppp1r12c
Ppp1r14b
Ppp1r16a
Ppp1r21
Ppp2cb
Ppp2r2d
Ppp2r5c
Ppp2r5e
Ppp4r1
Ppp6c
Pqbp1
Pramef8
Prdm2
Prdm4
Prdm9
Prex1
Prkacb
Prkag2
Prkd2
Prkrip1
Prosc
Proser1
Prpf31
Prpf39
Prpf4
Prpf40a
Prpf40b
Prpf8
Prps1l3
Prps2
Prr14l
Prr24
Prrg2
Psen1
Psip1
Psmb4
Psmc3
Psmc5
Psmc6
Psmd11
Psmd14
Psmd6
Psmd8
Psme2
Psme3
Psph
Ptbp1
Ptbp2
Pten
Ptger4
Ptges3
Ptplad2
Ptpn11
Ptpn12
Ptpn23
Ptpra
Ptrh1
Pwp2
Pyurf
Qars
Qrsl1
R3hcc1l
R3hdm2
Rab11b
Rab1b
Rab21
Rab23
Rab2b
Rab3gap1
Rab7
Rabepk
Rabggta
Rabif
Rabl6
Rac2
Rad17
Rad18
Rad50
Rad54b
Rala
Ranbp2
Rapgef6
Rars
Rasa1
Rasa2
Rbbp4
Rbks
Rbm12b1
Rbm14
Rbm18
Rbm19
Rbm22
Rbm26
Rbm27
Rbm33
Rbm7
Rbmx
Rbmxl1
Rcan1
Rchy1
Rdh14
Reep3
Rell2
Relt
Rev3l
Rexo1
Rexo4
Rfc2
Rffl
Rftn1
Rheb
Ric8
Ric8b
Ring1
Rinl
Rmdn1
Rmi1
Rmi2
Rmnd5b
Rnaseh1
Rnasek
Rnf103
Rnf114
Rnf115
Rnf13
Rnf135
Rnf14
Rnf214
Rnf215
Rnf31
Rnf41
Rnls
Rnpc3
Rnpep
Rom1
Rpa2
Rpe
Rpf1
Rpia
Rpl10a
Rpl12
Rpl18
Rpl23
Rpl23a
Rpl27a
Rpl36al
Rpl6
Rpl7a
Rpl8
Rplp1
Rpn2
Rpp14
Rprd2
Rps11
Rps13
Rps14
Rps15
Rps18
Rps29
Rps5
Rps6kb2
Rps7
Rps9
Rraga
Rragc
Rrn3
Rrp36
Rsbn1
Rsc1a1
Rsl1
Rtca
Rtn3
Rtn4ip1
Rwdd3
Rxrb
Rybp
S1pr3
Saal1
Sac3d1
Sacm1l
Samm50
Sap30bp
Sar1a
Sars2
Sart1
Sash3
Saysd1
Sbds
Sbno2
Sc5d
Scaf8
Scamp3
Scand1
Scnm1
Sco1
Sco2
Scyl1
Sde2
Sdf2
Sdf2l1
Sdf4
Sdha
Sdhb
Sdhc
Sec22c
Sec24a
Sec61a1
Sec63
Secisbp2
Senp3
Senp8
Sepsecs
Serinc1
Serinc3
Serinc5
Serp1
Serpini1
Setd1a
Setdb2
Setmar
Sf3a1
Sfpq
Sfr1
Sfswap
Sft2d2
Sh2b2
Sh2b3
Sh3bgrl3
Sh3bp5l
Sh3gl1
Sharpin
Shfm1
Shoc2
Shpk
Sidt2
Sigmar1
Sik2
Sipa1l3
Slc12a6
Slc17a5
Slc22a15
Slc25a1
Slc25a16
Slc25a17
Slc25a27
Slc25a33
Slc25a46
Slc26a6
Slc2a1
Slc30a1
Slc30a9
Slc31a1
Slc31a2
Slc35a1
Slc35a4
Slc35a5
Slc35c2
Slc35d1
Slc35e1
Slc35e2
Slc35f5
Slc36a4
Slc38a1
Slc38a10
Slc38a7
Slc39a1
Slc39a6
Slc39a7
Slc43a2
Slc4a2
Slc7a6
Slc9a8
Slirp
Slmo2
Slu7
Smarcad1
Smarcal1
Smc4
Smcr7
Smcr7l
Smcr8
Smek1
Smek2
Smg1
Smg5
Smg6
Smg8
Smim11
Smim12
Smim8
Smndc1
Smurf2
Snapc1
Snapc4
Snapc5
Snapin
Snrnp27
Snrnp35
Snrpa
Snrpc
Snrpe
Snx1
Snx13
Snx27
Snx32
Snx4
Snx9
Socs5
Sos1
Sp3
Sp4
Spag7
Spag9
Spata2
Spata7
Spns1
Sppl2a
Spryd3
Sptlc1
Sptssa
Spty2d1
Sqstm1
Srfbp1
Srp14
Srp19
Srp9
Srr
Srrt
Srsf1
Srsf2
Srsf4
Srsf7
Ssbp1
Ssbp2
Ssna1
Ssr1
Ssr3
Ssrp1
Stag2
Stam
Stard6
Stard7
Stat1
Stat6
Stk10
Stk19
Stk24
Stk25
Stk38
Stk38l
Stoml2
Strap
Stx16
Stx18
Sugp1
Sugt1
Sun2
Supt16
Supt20
Suz12
Syncrip
Syngr4
Synj1
Syvn1
Tab1
Tacc1
Tada1
Tada3
Taf1
Taf10
Taf11
Taf12
Taf15
Taf2
Taf4a
Taf7
Taf9
Tagap
Taok2
Tardbp
Tbc1d10a
Tbc1d10b
Tbc1d13
Tbc1d15
Tbc1d17
Tbc1d20
Tbc1d22a
Tbc1d22b
Tbc1d7
Tbc1d8b
Tbc1d9b
Tbcd
Tbce
Tbl1xr1
Tbp
Tbrg1
Tbrg4
Tbx6
Tcea2
Tceb1
Tceb3
Tcf12
Tcf25
Tdg
Tec
Tecpr2
Tefm
Tep1
Terf1
Tex10
Tex2
Tfb2m
Tfip11
Tfpt
Tgfbr3
Tgfbrap1
Tgif1
Tgs1
Thada
Thap1
Thap11
Thap2
Thap7
Thoc1
Thoc5
Thoc6
Thrap3
Thtpa
Thumpd1
Thumpd2
Thumpd3
Timeless
Timm10b
Timm13
Timm44
Timm8a1
Tinf2
Tiparp
Tiprl
Tldc1
Tm9sf2
Tm9sf4
Tma16
Tmbim6
Tmco1
Tmco3
Tmed10
Tmed7
Tmed8
Tmem106a
Tmem106b
Tmem123
Tmem14c
Tmem160
Tmem167b
Tmem168
Tmem170b
Tmem179b
Tmem183a
Tmem184c
Tmem186
Tmem198
Tmem203
Tmem209
Tmem214
Tmem217
Tmem222
Tmem223
Tmem234
Tmem243
Tmem30a
Tmem33
Tmem39b
Tmem42
Tmem48
Tmem55b
Tmem59
Tmem62
Tmem64
Tmem65
Tmem68
Tmem8
Tmppe
Tmub1
Tmub2
Tmx1
Tnfaip3
Tnfaip8
Tomm5
Tomm70a
Top1
Top3a
Tor1aip1
Tor2a
Tpgs1
Tpk1
Tpp2
Tprkb
Tra2a
Trabd
Traf3ip3
Trap1
Trappc1
Trappc12
Trappc3
Trappc6a
Trappc6b
Trim26
Trim68
Trip4
Trmt10a
Trmt10b
Trmt10c
Trmt11
Trmu
Trnt1
Tsen15
Tsen2
Tsen34
Tshz1
Tspan13
Tssk6
Ttc16
Ttc17
Ttc30b
Ttc32
Ttc39b
Ttc39d
Ttc7
Ttc9c
Ttf1
Tti1
Ttll5
Ttpal
Tufm
Tvp23b
Twf2
Txlna
Txlng
Txn1
Txndc11
Txnl4a
Txnrd3
Tysnd1
Tyw3
Tyw5
U2af1
U2surp
Uap1l1
Ubac1
Ubald1
Ubap2l
Ubc
Ube2b
Ube2f
Ube2g2
Ube2j1
Ube2k
Ube2q1
Ube2w
Ube2z
Ube3c
Ubiad1
Ubl4
Ubl7
Ubqln4
Ubr1
Ubr2
Ubr4
Ubxn1
Ubxn11
Ubxn7
Uck1
Ufm1
Uggt1
Umps
Unc119
Unc50
Upf2
Uqcc
Uqcrfs1
Uqcrq
Usb1
Usf1
Usp11
Usp19
Usp33
Usp38
Usp42
Usp47
Usp48
Usp8
Utp11l
Utp15
Utp18
Utp3
Vamp2
Vamp4
Vapb
Vars2
Vcpip1
Vdac3
Vhl
Vmn1r4
Vps16
Vps18
Vps33b
Vps37b
Vps52
Vps53
Vrk1
Vrk3
Vti1b
Wac
Wapal
Was
Wasl
Wbp11
Wbp1l
Wbp7
Wbscr16
Wdfy1
Wdfy2
Wdfy4
Wdr26
Wdr34
Wdr45
Wdr45b
Wdr46
Wdr48
Wdr61
Wdr7
Wdr78
Wdr81
Wdr91
Wfdc3
Wrap73
Wrnip1
Wsb1
Wtap
Wwp2
Xpc
Xpnpep3
Xpo1
Xrcc4
Xrn2
Xrra1
Ybey
Ybx1
Yeats4
Yipf2
Ythdc1
Ythdf1
Ywhae
Ywhag
Ywhah
Ywhaq
Zbtb21
Zbtb22
Zbtb24
Zbtb26
Zbtb3
Zbtb37
Zbtb41
Zbtb5
Zbtb6
Zbtb8os
Zbtb9
Zc3h10
Zc3h3
Zc3h6
Zc3h7a
Zcchc9
Zcwpw1
Zdhhc17
Zdhhc24
Zdhhc4
Zer1
Zfand2b
Zfat
Zfc3h1
Zfp110
Zfp119a
Zfp143
Zfp148
Zfp160
Zfp169
Zfp184
Zfp212
Zfp236
Zfp259
Zfp263
Zfp273
Zfp292
Zfp296
Zfp330
Zfp341
Zfp362
Zfp36l2
Zfp382
Zfp397
Zfp408
Zfp429
Zfp438
Zfp444
Zfp451
Zfp458
Zfp472
Zfp507
Zfp51
Zfp513
Zfp518a
Zfp523
Zfp58
Zfp605
Zfp623
Zfp644
Zfp658
Zfp69
Zfp759
Zfp784
Zfp787
Zfp809
Zfp821
Zfp865
Zfp868
Zfp874a
Zfp933
Zfp94
Zfp949
Zfp954
Zfp961
Zfr
Zgpat
Zkscan1
Zkscan5
Zmpste24
Zmym1
Zmym4
Zmynd12
Znhit2
Znrd1
Znrd1as
Zranb1
Zscan2
Zscan22
Zufsp
Zxdc
Zyx
Zzef1

## Sheet: Ac_targets
Cd52
Ctss
Alas1
Thoc7
Syngr2
Rpn2
Rpl10a
Myl12b
Timm13
Atox1
Tmem59
Myl6
Kdelr2
Sugt1
Nme1
Hmgb1
Acsl1
Lsm4
Rpl12
Tmem38b
Hprt
Psmd11
Chst12
Stk24
Fam195b
Cmc2
Fkbp2
Ybx1
Atp8b4
Psmc6
Banf1
Cyc1
Gadd45g
Pfdn4
Btg1
Itgb2
Pbdc1
Wbp11
Yif1b
Nhp2
Tmem234
Dazap2
Mrpl33
Hmgb2
Hsp90ab1
H2afv
Cox7a2
Rps5
Clec4a2
Ndufc2
Mfsd10
Mcm2
Pa2g4
Pcif1
Rpl7a
Rgs2
Tnfaip8l2
Mrpl17
Psmd14
Ssbp4
Hck
Pkm
Stk19
Serinc3
Psmc5
Dusp2
Alyref
Ralbp1
Shfm1
Ssna1
Hsp90aa1
Clic1
Commd7
Xpc
Anxa3
Lgals1
Eif4e
Pcbp1
Apobec3
Rpl23a
Nutf2
G0s2
Chrac1
Uqcrfs1
Ctsh
Trappc6a
Rchy1
Cetn3
Phf5a
Ebp
Glud1
Fubp1
Pgls
Lsp1
S100a10
Srsf2
Ndufa4
Psmb4
Gnb2l1
Laptm5
Eif1ad
Zwint
C1galt1c1
Eif4a1
Ddrgk1
Txn1
Mrpl21
Sptssa
U2af1
Ccdc12
Prr13
Slc25a17
Cdkn2d
Tmem160
Rpl6
Dguok
Mrpl15
Lrrfip2
Lsm14a
Fcgr2b
Rpl27a
Anp32e
Lamtor2
Smc4
Nucb2
Gng12
Rpa2
Gpx3
Elane
Cenpa
Usp14
Abhd5
Smek2
Rheb
Ier2
Nfkbia
Sfr1
Ufm1
Dusp1
Cks2
Samhd1
Cops5
Lamtor3
Rab7
Acot9
Hoxa7
Bbip1
Cox5a
Mapre1
Plekhf2
Ninj1
Sdf2l1
Tmem14c
Adssl1
Rps13
Rpe
Nsmce1
Ndufs6
Ifitm6
Lyz2
Snrpe
Calm1
Snx2
Ssbp2
Ube2k
Bad
Tbrg1
Plaur
Ict1
Rbbp4
Gstm1
Sdcbp
Dad1
Nol7
Cnbp
Actr3
Mrps21
Khk
Cnn2
Baz2b
Psme2
Nt5c3
Gadd45a
Vdac3
Marcksl1
Atg3
Park7
Srp9
Vrk1
Cd53
Pmf1
Gnai2
Ywhah
Leprotl1
Gtf3c5
Cd69
Mtmr10
Copa
Plekhg2
Mks1
Spata2
Bc028528
Prosc
Fam84b
Polr3c
Pik3c2a
Dram2
Tmed10
Tmem19
Bnip3l
Rybp
Mon1b
Blvrb
Zfp119b
Tmem8
Mbnl1
Apobr
Gpn3
Cenpn
4930503l19rik
Cept1
Abcd4
Tmco4
Spty2d1
Daglb
Hsd17b4
Actn4
Adrb1
Serinc2
Atg13
Ermp1
1810013l24rik
Psph
Kpna1
Pigb
Max
Dhrs7b
Ercc6
Zfp58
Slc41a3
Mrto4
Trmt10a
Slc38a1
Lsg1
Trappc3
Gm5134
Fam45a
Nek6
Tsen15
Fads1
Odc1
Mycbpap
Rnf115
Ppm1l
Atp1a1
Gbp7
9330160f10rik
Immt
Yaf2
Tmem33
Tmed8
Setdb2
1700034h15rik
Slc38a7
Pgap2
Tmem218
Def8
Ercc4
Eltd1
Sox4
Nrp1
Mblac1
Slc30a1
Ncoa4
Fbxl8
Rpia
Immp2l
Prkag2
D14abb1e
Vps53
C330018d20rik
Rbm22
Hscb
Hist1h2ak
Pnpt1
Sharpin
Dzank1
Tubb6
Tcea2
Ab041803
Fam83h
Tmem184c
Pick1
Il17ra
Cbfa2t3
Dirc2
Atp6v1e1
Dock11
Dnph1
Ppp1r11
Ing4
Tfec
Spata24
Gtf2b
Spag9
Etohi1
Prps1l3
Ythdc1
Hist2h2be
Chek2
Zscan22
Rev3l
Arpc5l
Cstb
Gng10
Ccp110
Neil2
Lrrc8d
Arl8b
Ganc
Vamp2
Donson
Nt5dc1
Kxd1
Batf
Adam17
Hmbox1
Gbf1
Cinp
Ndufs4
Nmi
Pigt
Fam117b
Olfml2b
Txndc11
Mdp1
Fam203a
Eftud2
Dcaf7
Oma1
Tor3a
Ppp1r14b
Ccdc134
Capns1
Il4i1
Shcbp1l
2210011c24rik
Nr2c2ap
Bc003965
Rpp14
Rbms2
Srfbp1
Gnaq
Dock6
Ywhae
Aggf1
Dusp16
Wls
Aida
Gse1
Akap8
Pdcl
Lyst
Manbal
Zbtb22
Rbm33
Rab3gap1
Myo5a
Ppig
1700055d18rik
Tysnd1
Ddx42
Wdfy1
Trip4
Pdf
Dbr1
Casp2
Rab11b
Cpd
Btbd7
Rasa2
Drosha
Rasgrp2
Mrrf
Tmem106b
Atmin
Zfp362
Ssr3
Fbp1
Xk
Icmt
Slc9a2
Atp6ap2
Nudcd3
N4bp2l1
Msl3l2
Slc25a33
Lrrc59
Sh3bp4
Thap7
Zfp472
Mppe1
Mgat2
Eif2s3x
Pink1
Serpini1
Cstf2t
Taf4a
Thumpd2
Rabggta
Ccdc138
Fam64a
Eif2s1
Gja4
Lmo2
Wasl
Tns3
Srp14
Mdm4
Akt3
Senp3
Ptpru
Adprm
Sytl1
Cab39l
Zzz3
Pdlim2
Cct6a
Cpne7
Rp2h
Fas
Eef1a1
4933440n22rik
Card6
Braf
Tbc1d17
Prpf40a
Cables1
Mtfr1
Hnrnph1
Tada1
Saysd1
Ginm1
Mrpl4
Ehhadh
Csf2rb
Tmem67
Dpm1
Parp8
Ccdc181
A730061h03rik
Taf1
Slc31a1
Ndel1
C2cd2
Bicd2
Cnih3
Cep63
Vapb
Trnt1
Fcgr4
Rab34
Prpf6
Plekha4
Reep3
Rbm19
Mapk7
Acbd6
Map2k5
Xylt2
Timeless
Fam173b
Tvp23b
4931406p16rik
Sh2b2
Hrh2
Ppm1a
Mt1
Hmgcr
Gm10760
Rps6kb2
Mark2
Cisd2
Rufy1
Chpf2
Bc017643
Wrap73
Samd15
1110018g07rik
Tmem238
Atic
Lrfn4
Upf2
Stag2
Sdf4
Trappc6b
Zfp36l2
Hey1
Polr1e
Harbi1
Efhc1
Nup133
Zer1
Atp1b1
Mocos
Arhgap24
Vps18
Erap1
Tfb2m
Paf1
Camk1
Zfp518a
Igfbp4
Poc1b
Exosc10
Tmco1
Unc50
Pak6
Hist2h2ac
Mtpap
Ubald1
Nxnl2
Hspbap1
Gtf2h1
Rbm43
Rbm12b1
C330007p06rik
Phf10
Nufip2
Tbcel
Nelfa
Sipa1l3
Ccdc117
Fkbp15
Asxl2
Herpud2
Cmas
Cd46
Abhd11
Ext1
Wfs1
Alg1
Taf1b
Ppp4r1
G430095p16rik
Ai429214
Itgb1bp1
Gpr137
Prpf40b
Zbtb3
Qrsl1
Acadsb
Socs5
Lrrc20
Tmed4
Edem3
2310011j03rik
Stam
Ergic2
Wdr78
Lsm10
Lrriq3
Poll
Myd88
Trafd1
Ehbp1l1
Crip2
Lpcat4
Prr15
Nfkbie
Camk2n1
Ripk2
Tmem106a
Zfp592
Kcnk6
Zfp821
Adrbk2
Sgk3
Mipol1
Cstf2
Nmd3
Ubiad1
Cers6
Mtmr9
Snx20
Nfia
Zfp94
Smek1
Kctd11
2510009e07rik
Tmem66
Pip5k1a
Mettl16
Meiob
Crem
Plekha2
Elmo1
Rab2b
Mtmr3
Fam227a
Chst15
Snta1
Psen1
Dedd
Zfp961
Myo1f
Wsb1
Ccdc151
Slc25a38
Gdi1
Cope
Tm9sf4
Naa38
Tmub1
Hbs1l
Ptp4a3
Ccnl2
Hcfc2
Crcp
Sde2
Poc1a
D10wsu102e
Gosr2
Trmt10b
Ptpn23
Tep1
Atrnl1
Agrn
Lrp4
Ptpn11
Fam53b
Ahcy
Ndufs2
Ab124611
Rps14
1700018a14rik
Ctdnep1
Card9
Fam220a
Mtg1
Dhcr7
Pomp
Dhx37
Mctp1
Spata7
2003-03-01
Sipa1
Pqbp1
Nkrf
8430410a17rik
Afmid
Hist2h2bb
Map3k9
Cux1
Foxq1
Gsk3a
Sgta
Heatr3
Sat1
Gtpbp1
Uggt1
P4ha1
Gpx4
Sp4
Ai413582
Idnk
Usp9x
Tpp1
Pmm2
Nol10
Ubr4
Stk38l
Nfatc2
Cox15
Coro1b
Itfg2
Rabl2
Sbno2
Ppp1r16a
Tsen34
Gemin8
Atrx
Srp19
Nedd1
Zfp513
Tpk1
Herc4
Zfp605
Dhdds
Smap1
Pdcl3
Anxa2
Ppdpf
Phf2
Hlx
Tbc1d22a
Hmgxb3
Mfsd2a
Dhrs7
Emp3
Chmp4b
Ascc3
Gm21985
Nkiras2
Copg2
Zfp467
Zfp236
Lrg1
Znrd1as
Amer2
Apobec1
Abt1
Agl
Rassf3
Eral1
Dcakd
Arsg
Zbtb12
Bphl
Ythdf1
Fbxo42
Dnmt1
Wbp7
Smg8
Galnt7
Gbp2
Dpp3
Spag1
Shpk
Tcf25
Scyl1
Rtn3
Myadml2
C030006k11rik
Syk
Armc7
Sos1
Dmtf1
Pon3
Icam5
Tmem86a
Aff2
Cd79b
Abi1
Gramd1a
Gsdmd
Josd1
Tmppe
Tma16
Pdlim5
Irf2bp1
Chmp2a
Cebpz
Mki67ip
Htatip2
Aw549877
Pwp2
Ssh2
Ctdsp2
Farsb
Mad2l2
Acap3
Csde1
Ubn2
Arhgap21
4930544d05rik
Atp11a
Phkb
Atf5
N6amt2
Fam185a
Ube3c
Rell1
Usb1
Ddx56
Ttpa
Ensmusg00000098134
Cdkn2aipnl
Tnfaip8l3
Ifnlr1
Fbxo30
Marveld2
Cct7
Bc030307
4930597o21rik
Sec31b
Apol7d
Gpr126
Zfp787
Fam63a
Dcaf8
Drg1
Alg14
Rmi1
Nom1
Klhl24
Ncstn
2006-03-01
Dtymk
Tcf12
Golga2
Mrpl13
Ecsit
Hes2
Ppm1d
Taf12
Mmd
Cwc25
Pccb
Fabp5
Crtc3
Ccdc23
Fpgt
Lrrc56
Pfkp
Pde8a
Deaf1
Nisch
Camsap2
Phospho2
Zbtb6
Rcan1
Srek1ip1
Galc
Eml3
Gm9958
Gpaa1
Heg1
Tigd3
Ankrd32
Eif3l
Calm2
Tnfaip8
Snx4
Smndc1
Plk4
Pcyt2
Slc38a10
Dock10
Luc7l3
Ap4e1
1700016k19rik
Fut4
Aven
Tprkb
Agps
Nck1
Phlpp2
Was
Gabpb1
Bap1
Smg1
Lima1
Tldc1
Arfgap1
Snx27
Ccdc122
Smim8
Phactr4
Tmem219
Ubc
Tmem179b
Polr2m
Ftsjd1
Cutc
Wbp1l
Akip1
Vmn1r4
Pacs2
Arpc3
Plekho1
Zfp609
Mepce
Zc3h7a
Pde6d
Eya3
Cdk5rap3
Rad18
Slc37a1
Rpf1
Pnpla7
Stard5
2610507b11rik
Actn1
Wdr7
Ccdc84
Parp4
Bc035044
Phf7
Slc25a16
Zcchc9
Tyw3
Calhm2
Ap5z1
Mink1
G630090e17rik
Dip2c
Tead3
2210408i21rik
Hps3
Dnajb1
Dapp1
Snapc4
Slc35a1
Zscan2
Mta2
Ttc39b
Bre
1110008j03rik
Zfp451
Ly75
Ccdc103
Casp7
Rab28
Psmc3
Lrrc8c
Med27
Maff
Slc12a6
Slc35d1
Bhlhe40
Tardbp
Exo5
Pdzd8
Pdcd7
Sqstm1
Antxr2
Gmip
Ptger4
Zbtb7c
Gm16286
Fndc4
Chchd5
Palm
Acpp
Map7d1
Lin54
Isoc1
Trappc1
Metap2
Cryz
Mul1
Ggnbp2
Fadd
Cep152
B3galt6
2600006k01rik
Rnf144b
Ddx6
Rnf103
Tmem39b
Suz12
Serp1
Dnajc4
Abcc4
Ipo13
Ftsj1
Gna15
Fbxo7
Nploc4
Esr1
Galt
Lipa
Blm
Phf1
Med18
Eri3
Ankrd52
Snap23
1810033b17rik
Sf3a1
Zfp36l1
Panx1
Ai987944
Smg5
Rab3b
Nrbp1
Armcx5
Ubr1
Vcpip1
Emc10
4921507p07rik
Slc30a4
Emc1
H6pd
Alg10b
Usp33
Fmnl1
Oxnad1
Kcna3
Gm20503
Ensa
Dph3
Jmy
Rars
Galm
Tiprl
Cxcr4
Ccdc176
Stat1
Tbp
Gm12500
Xrra1
Amdhd1
Lsm3
Zfat
Fn1
Wdr34
Agxt2l2
Mrps23
Creb1
Clip1
Phf20
Cyb5d2
Crot
Chd9
Atxn7
A630007b06rik
Sik3
Acads
Prpf39
Sac3d1
4930500m09rik
Dvl2
Rexo1
Grk4
Cxxc1
Copg1
Mettl23
Slc26a2
C030039l03rik
Acy1
Tmed7
Zfp933
Tra2a
Zbtb46
Cdipt
Nr3c1
Tmem123
Sqle
Fkbp8
Lclat1
Isoc2b
Rnf214
Pramef8
Mbtd1
Fam120a
Ccdc62
Mettl4
Gpr141
Yipf2
Tnfaip2
Cdc23
Carkd
Tec
Utp3
Depdc1b
Ankrd12
Shroom1
Mgme1
Cnr2
Slc35e2
Zfp759
Ndufb10
Qsox1
Pde7b
Gem
Anapc2
Mat2b
Cdan1
Itpripl1
Cdk19
Idh3b
Helb
Fastk
Fbrsl1
Hist1h3g
Cklf
Ring1
Plekhg3
Mrs2
Prdm4
Mob3a
Trp53inp2
Mapk8
4632404h12rik
Dstyk
Acbd5
Kif19a
Sh2b3
Arl2bp
Pole4
Pnpla2
Tor1aip1
Rabif
4933434e20rik
Lyrm1
Wdyhv1
Il1rap
Fcf1
Traf3
Zfand5
Lats2
Fam173a
Eif4ebp2
Plod1
Thoc6
Socs3
Ttll5
Tecpr2
Armc8
Hs6st1
Ctso
Tbc1d8b
Rps2
Prdm2
Fam216a
Crebzf
Cib2
Cyb5
Dennd1b
Taok2
Slc36a4
Ensmusg00000097239
Mapre2
Dnhd1
Tiparp
Ttyh3
Secisbp2
Matr3
Fam134b
Zbtb21
Rfx2
Txlng
4930512b01rik
Rnf135
Lztr1
Rsc1a1
Zfp809
Sfxn1
Abhd13
Ip6k1
Galnt11
Hist2h2ab
Cmip
Ankrd13d
1110008f13rik
Rps7
Pvrl2
D17h6s53e
Ccdc91
Dcaf11
C730034f03rik
Gm5447
Pip5k1c
Mrps18b
Aldh3b1
Arrb1
Zkscan16
Arhgdia
Trim34a
Thap11
Zdhhc4
Rnaseh1
Zdhhc24
Crnkl1
Fbxw4
Uhmk1
Rufy4
Mrps34
H2-ke2
Nop14
Eif2d
Napg
Ppp2r2d
Fam50a
1500011b03rik
Tbc1d13
Slc22a15
Amz1
Baz1b
Erbb2ip
Zc3h6
Immp1l
Sfpq
Rexo4
Jup
Usp47
Tbxas1
Pot1a
D16ertd472e
Bckdhb
Umps
Erlin2
Plp2
Pik3c2b
Nkx6-2
Nek1
Gm20390
Ankle2
Cdv3
Fkbpl
Zfp184
Setmar
Tstd3
Plcb2
Bend3
Hk3
Gde1
Slc30a9
Ccdc15
Ppp2r5c
Ppapdc1b
Ppp6c
Lrguk
Rbm18
Mfsd6
Smpd2
Slc6a6
Proser1
Dtwd1
Thumpd3
Bbs2
Slc35c2
Klf13
Cops3
Zzef1
Nupr1l
Fam32a
Acyp1
Eapp
C130040n14rik
Abcc10
Abcd1
Capn10
Zfp658
Mrpl27
Lcorl
4933426m11rik
Dscc1
Stoml2
Rps6ka1
Rsl1
Adar
Nosip
Sh3pxd2b
Xrcc4
Csf1r
Knstrn
Tbc1d16
Zdhhc17
Stk25
Rasa1
Fam49a
Dhrs3
Acat1
Ppp2r3a
Lyplal1
Grb2
Chm
Rbfa
Tex2
Tpm2
Ptpn12
Fam105b
Ero1l
Prkd2
Smcr8
Pqlc1
Zfp51
Tmem222
P4ha2
Nsun3
Cirh1a
Gm9900
4930570n19rik
Hmg20a
Msh5
Rbm26
Pot1b
Cmpk1
Glb1l
Cops8
Lrif1
Arhgef12
Matn3
Aldh3a2
Tshz1
Ccar1
Gm561
Rpl23
Parl
C920021l13rik
Cd55
Nfu1
Ift172
Mfhas1
Cox16
Nfatc3
Ndufaf7
Pask
Mfap1b
Bc025920
Kdm3a
E130309d02rik
2810428i15rik
Clic4
Chd7
Pvr
Prex1
Arntl
Agbl2
Zfp507
Zfp458
Snx13
Psmd6
4930438a08rik
Mpz
Rtca
Rnf141
Aph1b
Cntrob
Mlxipl
Rhbg
Thtpa
Cnbd2
Hnrnpa0
Cnot1
Clk4
Ppp1ca
Rnpc3
Rraga
Pom121l2
Gtf2a2
Utp11l
Dnajb4
1110012l19rik
Phc2
Tgs1
Map10
Fam193a
Ythdc2
Stx18
Itgal
Per2
Osbpl2
Slc26a6
Snrpc
Ubxn11
Snrnp27
Rel
Myo1c
Coq7
Btbd9
Nrip3
Gm16515
Mfn2
Ptges3
Arhgap30
Tmx1
Tmem203
4930519p11rik
Hspd1
Ppif
Pik3cg
Kifc3
Usp42
Kbtbd3
Zfp169
Fcho2
3300002i08rik
Creg1
8430427h17rik
Thoc1
Zfp523
Nup107
Arhgap17
Mrps16
Atg10
Pitpna
Tex264
Ddit3
Saal1
Crebbp
Utp18
Mrpl53
Ell
Echdc1
Plbd2
Mapk13
Rasl10a
Zfr
H2-q4
Myl6b
Rps6ka3
Muc1
Cdt1
Fam69a
Slc7a6
Fbl
Zcchc11
Srsf7
Chchd1
Ubac1
Terf1
Wapal
1110008p14rik
Uqcrq
Hcfc1r1
Ccdc130
Trmt11
Ezr
Zfp874a
Tpgs1
Dync1li1
Dcaf12
Mrps35
Trmt10c
Lrrc16b
Zbtb41
0610039k10rik
Ifngr2
Nfil3
Ogfr
Eif2ak4
Iws1
Ggta1
Cldn25
Scand1
Kcnab3
Ctsd
Tesc
Rbm7
Cbs
Wdr48
Pard6g
Ankrd16
Mpp7
Acat2
Camkk2
Rnf114
Cerkl
Kdm4a
Egln3
Bc024978
Nkx6-1
Mrpl12
Arhgap33
Lyn
S1pr3
Zxdc
Sdf2
Mapk1ip1
Slc25a27
Cd47
Tdg
Gfpt1
Bola2
Tbc1d2
Notch1
Crtc2
Ckap4
Smurf2
Kdm6a
E4f1
Clk1
Mctp2
Pogk
Far1
Fndc3b
Rbm14
Cul4a
Smim11
Rilp
Zufsp
Mtmr1
Ccny
Mzf1
Serinc5
Sar1a
Rnd3
Smpd5
Kif5a
Dixdc1
Lcp2
Pip4k2c
Fam151b
Atf6
Kdm8
Cygb
Btk
Timm8a1
Gin1
Eprs
Tmem168
Smim20
Rad17
Vps33b
Sec61a1
2610301g19rik
B230217c12rik
Arfgap2
Fam160a2
Tbce
Clcn6
4930523c07rik
Cat
Ube2j1
Reck
Prr24
Adnp
Cspp1
Slc6a20a
Smo
Nr4a1
Rrp12
Zfp608
Wdfy4
Fam98a
Lrpap1
Sp2
Hjurp
Sh3gl1
Ubxn7
Ambra1
Dpy19l4
Chkb
Pard6a
Tfip11
Ccdc47
Rftn1
Itgb3
Gm10447
Dse
Tbx6
Syce2
Cops7a
2310044g17rik
Gba
Mki67
Fam20b
Arhgef37
1810055g02rik
Dcp1a
Pmvk
Adamts3
Skil
Gnb1
Cbx4
Ccdc125
Rala
Rbpms
Klhl9
Fam213b
Ino80e
5031439g07rik
Tmem30a
Padi2
Tpd52l2
Adrbk1
Tmem223
Senp8
Sec22c
Bc056474
Capn2
Psme3
E130012a19rik
Hdhd3
Ifih1
Galnt6
Fkbp1a
Elac1
D19bwg1357e
Mtif2
Ubxn2a
Tmem62
Acp2
Sbds
Zfp948
Lyrm4
Ppcs
Txlna
Golga7
Tmub2
Hdac2
Patl1
Il15ra
Hnrnph3
Ai314180
Tagap
Kif9
Dpf3
Csnk1e
D19ertd737e
Zfp644
Ago2
Zfp219
Tsen2
Adk
E030030i06rik
Rsad1
Trap1
Magohb
Cep350
Mier1
Dhx57
Epg5
Aw554918
Cyp27a1
Dlec1
Zfc3h1
Zfp160
Sdhb
Zmym1
Mtpn
4632428n05rik
Lrrc27
Abcg1
Zbtb9
Adap2
Tacc1
Lactb2
Cyp39a1
1810037i17rik
Wdr81
Atrip
Ep400
Gm21987
Zfp438
Zfp330
Dennd5b
Cdc25c
Pkp2
Ssr1
Plekhm1
Inpp5j
Tmco3
Cdk2ap2
Sin3a
Elavl1
Rassf2
Nelfcd
Strap
Rab3gap2
Inpp5a
Srpk2
Ikbke
Wnt9b
Slc13a5
Ccdc126
Arfgef1
Egln1
Lancl2
Syngr4
Ttpal
Tor2a
Mns1
Bet1
Usp11
Rnf41
Wdr45
Fuca2
Pex2
Prpf31
Stpg2
Rnf213
Nit1
Mtx1
Ggct
Ndrg1
Uba7
Tab1
Pop5
2410017i17rik
Gpatch2l
Casp8
Hist1h2bn
Pla2g16
Cyb5r1
Rfc2
Iffo1
Rfx5
Lrrc57
Taf7
Prpsap2
Gtf2ird2
Inpp4a
Trim26
Kansl3
Pctp
9130011e15rik
Atp6v0a1
Lrp1
Pfdn2
Dnttip2
Rabl6
Ccdc85c
Hid1
Kif21b
Ssbp3
Sh3bp5l
Cnot10
Stx16
Tbc1d9b
Smcr7
Zfp148
Cpsf3
Rprd2
Xpo1
Mkl2
Coro1a
Arf1
Sco1
Aup1
Fzd3
Mettl5
Srcin1
Trim68
Utp15
Tbl1xr1
Atp6v1d
Haus2
Ighmbp2
Snx9
Cd48
Lnpep
Trub2
Ier3ip1
Taf10
Spg21
Tmem170b
Tmem183a
Ap2m1
Zfp273
Sos2
Rtn4ip1
Supt16
Ttc17
Ric8b
Add3
Ewsr1
Ttc32
Papd5
Ppp1r10
Pde3b
Mtfr1l
Mrps12
Tmem65
Etv3
Pes1
Smurf1
Prpf4
Aaed1
Il4ra
Ptpn22
Cnppd1
Derl1
Exosc3
Setx
Atp2b1
Zbtb26
Ocln
Ccdc13
Heatr6
Klf9
Tbc1d7
Plcg2
Nr4a3
Gabarapl2
Zfand2b
Amn1
Top3a
Zfp949
Pitpnm1
Klhl8
Katna1
Ngrn
Rpp38
Stk10
Gm10762
Mxd4
Afg3l1
Zfp868
Rhou
Hist2h4
Rffl
Nupl2
Epb4.1l2
Trim12a
Sacm1l
Erp29
Micall1
Lysmd1
Pi16
2310033p09rik
Ppm1j
Kctd18
Slc16a3
Clcn5
Cwc27
Rnpep
Mbd3
Cgrrf1
Epn1
Tmem186
Ddx39
Gle1
Sash3
Ppp1r12c
Vrk3
Mfsd7c
Slco3a1
Grwd1
Cercam
Opa3
Rbbp8
Irgm2
Lacc1
2410016o06rik
Bcl7c
Rfk
Axin2
Wrnip1
Prkrip1
Cox19
E130116l18rik
Syvn1
Slc39a1
Pfkfb3
Bnc2
Hsp90b1
Cdca5
Timm10b
Cbr4
Dnajc5
Tmbim6
Pex10
Bc023829
2210016f16rik
Rmdn1
Cebpe
Fes
Mroh8
Hmbs
Litaf
Tbc1d10b
B4galt1
Igsf8
Ldlr
Ctcf
Mysm1
Ccdc157
Tinf2
Diras2
Akap10
Ivd
Ttc8
Snapc5
Tmem216
Swap70
Cry1
Cars2
Itgav
Csf3r
Trp53rk
Pik3r4
Rxrb
Rilpl2
Araf
6030458c11rik
Mfsd11
Aa386476
Fam69b
Rrp36
Tmem177
Wdr61
Irak1
Bach1
Pdcd6ip
Cnot2
Fbxo6
Pced1a
Wdr26
Elp5
Dis3l
Zfp259
Stk38
Tuba4a
Nrip1
Snapc1
Ube2b
Pde7a
Larp4
Gm11696
Nfe2l1
0610030e20rik
Herc6
Arhgap27
Nsf
Dnajb5
Ints12
Kpna6
Man2a1
Ankra2
Pam16
Hspb9
Lonp2
Uck1
Dtnb
Tm9sf2
U2surp
Slc35a4
Erf
Gps2
Plau
Ints3
Dpp8
Ptplad2
1810011h11rik
Twf2
Fat4
Slc25a13
Etaa1
Psip1
Laptm4b
Synj1
Sh3d21
Meis3
Gm166
Vars2
Tlr3
Aco1
Gchfr
Tmem184b
Aco2
Ofd1
Nos1ap
Hspa4
Nek8
Ai597479
Cenpw
Top1
Ap5m1
Cct4
Rpl8
Smg6
Erlec1
Lsm2
1110057k04rik
Dgat1
Rab23
Extl3
Gm9933
Ado
Pten
Ppp1r15a
Ap1g2
Bc043934
Sik2
A530088e08rik
Pam
Stat6
Ascc1
Fam114a1
Ap3b1
Zfp865
Aunip
Rell2
Narfl
Asb3
Sun2
Actr10
Ncor2
P2rx7
Dom3z
Adam10
Nostrin
Slc35a5
2610001j05rik
Dync2h1
H2-q10
Kat5
Exog
Ccdc142
Zkscan5
Cyp4v3
Pstpip2
Inip
Nqo1
Tmc6
Csgalnact2
Dpcd
Agphd1
Tmem167b
Bdh1
Entpd2
Pmaip1
Wdr45b
Sertad3
Ptbp2
[truncated: 1,030 more rows]
