# Supplementary material for: Loss of Kat2a enhances transcriptional noise and depletes acute myeloid leukemia stem-like cells
Source: eLife journal article supplement (doi:10.7554/elife.51754), 2020-01-27
Supplement: supp [file elife-51754-supp-v1.zip › elife_poa_e51754_Figure_6_source_data_1.xlsx]

## Sheet: Sheet1
	Compact			Mixed			Disperse
DMSO	0.68884	0.655203	0.750341	0.277625	0.318342	0.223056	0.0340847	0.026455	0.026603
S6K1 inh	0.211429	0.201646	0.231214	0.494286	0.547325	0.531792	0.294286	0.251029	0.236994
