# Supplementary material for: Loss of Kat2a enhances transcriptional noise and depletes acute myeloid leukemia stem-like cells
Source: eLife journal article supplement (doi:10.7554/elife.51754), 2020-01-27
Supplement: supp [file elife-51754-supp-v1.zip › elife_poa_e51754_Supplementary_file_1.xlsx]

## Sheet: 10XGenomicsScRNAseq_basicStats
Total cells sequenced	8270
Total WT cells sequenced	4042
Total KO cells sequenced	4228
median UMI/cell	2025
median genes/cell	859
