# Supplementary material for: Loss of Kat2a enhances transcriptional noise and depletes acute myeloid leukemia stem-like cells
Source: eLife journal article supplement (doi:10.7554/elife.51754), 2020-01-27
Supplement: supp [file elife-51754-supp-v1.zip › elife_poa_e51754_Supplementary_file_2.xlsx]

## Sheet: RobustGeneSet
Mrpl15
Lypla1
Tcea1
Atp6v1h
Rrs1
Sgk3
Cops5
Tram1
Eya1
Terf1
Rpl7
Ube2w
Tceb1
Mcm3
Ogfrl1
Ptp4a1
Ccdc115
Imp4
Ptpn18
Cox5b
Unc50
Mrpl30
Txndc9
Eif5b
Pdcl3
Rpl31
Il1r2
Mrps9
Asnsd1
Stk17b
Sf3b1
Hspd1
Hspe1
Mob4
Bzw1
Ndufb3
Cflar
Casp8
Sumo1
Eef1b2
Idh1
Rpe
Acadl
Rpl37a
Arpc2
Aamp
Ctdsp1
Cnppd1
Zfand2b
Stk16
Tuba4a
Wdfy1
Mrpl44
Serpine2
Mff
Sp110
Sp140
Sp100
Itm2c
Psmd1
Ncl
Ptma
Pde6d
Eif4e2
Cops8
Lrrfip1
Ramp1
Ube2f
Ilkap
Hes6
Ndufa10
Myeov2
Ppp1r7
Dtymk
Fam174a
D1Ertd622e
1810006J02Rik
Vps4b
Tsn
Nifk
Ralb
Dbi
Actr3
Ubxn4
Mcm6
Dars
Rassf5
Nucks1
Snrpe
Btg2
Adipor1
Ptpn7
Rnpep
Timm17a
Csrp1
Ptprc
Glrx2
Uchl5
Rgs2
Rgs18
Tpr
Arpc5
Ncf2
Glul
Ier5
Acbd6
Qsox1
Tor1aip1
Gm2000
4930523C07Rik
Mrps14
Cacybp
Rabgap1l
Prdx6
Vamp4
Sell
Tiprl
Mpc2
Rcsd1
Creg1
Tada1
Tmco1
Uap1
Fcgr2b
Fcgr3
Sdhc
Fcer1g
Ndufs2
Ufc1
Pfdn2
Arhgap30
Cd48
Tagln2
Rbm8a2
Adss
Cox20
Hnrnpu
H3f3a
Pycr2
Cnih4
Lbr
Srp9
Degs1
Marc2
Traf3ip3
Hsd11b1
G0s2
Cr1l
Hspa14
Fam107b
Phyh
Cdc123
Nudt5
Celf2
Atp5c1
Rbm17
Rsu1
Vim
Commd3
Apbb1ip
Abi1
Arrdc1
Mrpl41
Tubb4b
Tmem203
Ssna1
Uap1l1
BC029214
Edf1
Phpt1
Agpat2
Rpl7a
Surf4
Fcnb
Set
Ppp2r4
Tor1a
BC005624
Swi5
1110008P14Rik
Lcn2
Dpm2
Cdk9
Tor2a
Rpl12
Hspa5
Fbxw2
Psmd5
Rab14
Gsn
Stom
Ndufa8
Ptgs1
Psmb7
Rpl35
Arpc5l
Ppp6c
Arhgap15
Zeb2
Mmadhc
Prpf40a
Arl6ip6
Baz2b
March7
Rbms1
Psmd14
Gca
Spc25
Ppig
Ssb
Gorasp2
Hat1
Ola1
Atp5g3
Mtx2
Hnrnpa3
Nfe2l2
Ube2e3
Zc3h15
2700094K13Rik
Tmx2
Ssrp1
Mtch2
Ndufs3
Rapsn
Psmc3
Spi1
Arfgap2
Pex16
Cd82
Hsd17b12
Api5
B230118H07Rik
Cd44
Caprin1
Lmo2
Eif3m
Immp1l
Lin7c
Ccdc34
Nop10
Emc4
Emc7
Srp14
1700020I14Rik
Nusap1
Rtf1
Snap23
Ccndbp1
Pdia3
Serf2
Hypk
Mfap1b
Eif3j1
B2m
Gatm
AA467197
Sqrdl
Dut
Atp8b4
Usp50
Blvra
Dusp2
Sirpa
Snrpb
Nop56
Idh3b
Ptpra
Mrps26
Ddrgk1
Itpa
Tmem230
Pcna
Tmx4
Snrpb2
Dstn
Rrbp1
Snx5
Dtd1
Naa20
Xrn2
Nxt1
Cst3
Apmap
Nsfl1c
Fkbp1a
Rbck1
H13
Id1
Pdrg1
Hck
Commd7
Mapre1
Chmp4b
Raly
Eif2s2
Dynlrb1
Edem2
Eif6
Ergic3
Romo1
Rbm39
Scand1
1110008F13Rik
Samhd1
Rpn2
Manbal
Ctnnbl1
Lbp
Top1
Srsf6
Oser1
Serinc3
Pkig
Ywhab
Slpi
Sys1
Pigt
Ube2c
Ctsa
Pcif1
Mmp9
Slc35c2
Zfos1
Cebpb
Ptpn1
Dpm1
Pfdn4
Rtfdc1
Rae1
Rbm38
Vapb
Gnas
Ctsz
Atp5e
Slmo2
Psma7
Adrm1
Rps21
Ppdpf
Tpd52l2
Rgs19
Polr3k
Plp2
Timm17b
Was
Rbm3
Ebp
Cybb
Mid1ip1
Atp6ap2
Fundc1
Rp2
Ndufb11
Cfp
Pgrmc1
Slc25a5
Ube2a
Rpl39
Ndufa1
Lamp2
C1galt1c1
Hprt
Mospd1
Hmgb3
Vma21
Cetn2
Bcap31
Idh3g
Ssr4
Naa10
Flna
Emd
Rpl10
Atp6ap1
Lage3
Ubl4a
G6pdx
Dkc1
Mpp1
Fundc2
Vbp1
Pdk3
Msn
Igbp1
Nono
Rps4x
Xist
Pbdc1
Atrx
Cox7b
Pgk1
Hmgn5
Sh3bgrl
Rpl36a
Hnrnph2
Wbp5
Morf4l2
Prps1
Tsc22d3
Psmd10
Hsd17b10
Smc1a
Sat1
Acot9
Eif1ax
Sh3kbp1
Pdha1
Rbbp7
Tmsb4x
Hccs
Pex2
Gm8797
Mrps28
Tpd52
Impa1
Gyg
Rpl22l1
Sec62
Actl6a
Ndufb5
Dnajc19
Atp11b
Dcun1d1
Anxa5
Ndufc1
Mgst2
Ufm1
Exosc8
Alg5
Commd2
Serp1
Eif2a
Selt
Mbnl1
Gmps
Ssr3
Ccnl1
Smc4
Nmd3
Pdcd10
Ppid
Rps3a1
Hdgf
Mrpl24
Apoa1bp
Cct3
Glmp
Pmf1
Sema4a
Lamtor2
Ssr2
Dap3
Fdps
Scamp3
Mtx1
Krtcap2
Dpm3
Slc50a1
Cks1b
Tpm3
Rps27
Jtb
Ilf2
Snapin
Chtop
S100a1
S100a13
S100a6
S100a8
S100a9
Gm9774
S100a11
S100a10
Psmb4
Selenbp1
Psmd4
Vps72
Tnfaip8l2
Cdc42se1
Cers2
Ctss
Ensa
Mcl1
Mrps21
BC028528
Anp32e
Sf3b4
Bola1
Txnip
Polr3gl
Rbm8a
Rnf115
Sec22b
Atp1a1
Sike1
Bcas2
Capza1
Rap1a
Atp5f1
Chil3
Cept1
Cd53
Lamtor5
Gstm1
Gnai3
Psma5
Taf13
Hiat1
Gclm
1810037I17Rik
Tifa
Gar1
Ostc
Rpl34
Sgms2
Aimp1
Ppa2
Cisd2
Ube2d3
Nfkb1
Ppp3ca
H2afz
Lamtor3
Dapp1
Adh5
Eif4e
Gtf2b
Lmo4
Sep15
Sh3glb1
Bcl10
Gng5
Rpf1
Fubp1
Pigk
Acadm
Srsf11
Wls
Lyn
Rps20
Gm11808
Penk
Sdcbp
Rab2a
Plekhf2
Ggh
Pnisr
Pnrc1
Akirin2
Ndufb6
Dnaja1
Smu1
Bag1
Chmp5
Ube2r2
Dctn3
Vcp
Stoml2
Tln1
Hint2
Glipr2
Clta
Tomm5
Exosc3
Ccdc180
Anp32b
Nans
Sec61b
Erp44
Smc2
Nipsnap3b
Tmem38b
Rad23b
Txn1
Ptgr1
Gng10
Ptbp3
Hsdl2
Cdc26
Atp6v1g1
Tmem261
Rraga
Plin2
Rps6
Jun
Tm2d1
Usp1
Leprot
Tctex1d1
Tmem59
Yipf1
Magoh
Scp2
Prpf38a
Btf3l4
Osbpl9
Cdkn2c
Faf1
Cmpk1
Uqcrh
Nasp
Akr1a1
Prdx1
Rps8
Atp6v0b
Med8
Elovl1
Cdc20
Ebna1bp2
Svbp
Ybx1
Nfyc
Ppt1
Cap1
Ppie
Ndufs5
Akirin1
Utp11l
Sf3a3
Mtf1
Yrdc
Cdca8
Mrps15
Lsm10
Thrap3
Trappc3
Psmb2
Sfpq
Smim12
Ak2
Rbbp4
Zbtb8os
Marcksl1
Hdac1
Eif3i
Tmem234
Khdrbs1
Ptp4a2
Zcchc17
Snrnp40
Laptm5
Taf12
Trnau1ap
Atpif1
Dnajc8
Rpa2
Wasf2
Tmem222
Nudc
Rps6ka1
Hmgn2
Cd52
Sh3bgrl3
Stmn1
Mtfr1l
Tmem50a
Rsrp1
Syf2
Srrm1
Srsf10
Pnrc2
Fuca1
Hmgcl
Lypla2
Rpl11
Hnrnpr
Cdc42
Hp1bp3
Ddost
Minos1
Capzb
Mrto4
Padi4
Sdhb
Necap2
Efhd2
2510039O18Rik
Srm
Pgd
Eno1
Park7
Camta1
Vamp3
Acot7
Rpl22
A430005L14Rik
Tprgl
Rer1
Faap20
Gnb1
Nadk
Ssu72
Mrpl20
Ccnl2
Aurkaip1
Ube2j2
Fam132a
Sdf4
Cdk6
Sri
Tmem60
Rsbn1l
Dnajc2
Psmc2
Kmt2e
Tomm7
Rheb
Dnajb6
Tyms
Hadhb
Cenpa
Ost4
Khk
Atraid
Snx17
Ppm1g
Nrbp1
Mrpl33
Bre
Ppp1cb
Ywhah
Ctbp1
Slbp
Tacc3
Gm1673
Rnf4
Mfsd10
Lrpap1
Grpel1
Mrfap1
Lyar
Tmem128
Wdr1
Rab28
Fbxl5
Qdpr
Med28
Dhx15
Smim20
Rpl9
Ugdh
Smim14
Ube2k
Tmem33
Commd8
Ociad1
Fip1l1
Chic2
Srd5a3
Tmem165
Paics
Srp72
Cxcl2
Rchy1
G3bp2
Anxa3
Hnrnpd
Hnrnpdl
Cops4
Plac8
Mrps18c
Rpl5
Tmed5
Atp5k
Crlf2
Tpst2
Iscu
Selplg
Coro1c
Gltp
Git2
Ankrd13a
Mlec
Pop5
Dynll1
Srsf9
Triap1
Cox6a1
Pxn
Rplp0
Pebp1
Rfc5
Slc8b1
Rpl6
Erp29
Aldh2
Ppp1cc
Hvcn1
Vps29
Arpc3
Anapc5
Orai1
Psmd9
Rsrc2
Denr
Arl6ip4
Rilpl2
Tmed2
Ubc
Bri3bp
Ran
Mrps17
Gbas
Psph
Chchd2
Gusb
Asl
Crcp
Tmem248
Sbds
Ncf1
Rfc2
Lat2
Eif4h
Abhd11
Wbscr22
Bcl7b
Mdh2
Polr2j
Fis1
Cldn15
Znhit1
Ap1s1
Pop7
Gnb2
Mospd3
Tsc22d4
Ppp1r35
Pilra
Pilrb2
Cops6
Mcm7
Lamtor4
Get4
Eif3b
Chst12
Actb
Kdelr2
Daglb
Rac1
Ccz1
Bri3
Arpc1a
Arpc1b
Pdap1
Bud31
Cpsf4
Atp5j2
Rnf6
Rpl21
Gtf3a
Polr1d
Pomp
Ubl3
Hmgb1
Alox5ap
N4bp2l1
Bet1
Pon2
Shfm1
Rpa3
Ndufa4
2610001J05Rik
Capza2
Lsm8
Ndufa5
Arf5
Atp6v1f
Akr1b3
1810058I24Rik
Mtpn
1110001J03Rik
Luc7l2
Mkrn1
Ndufb2
Mrps33
Ssbp1
Zyx
Pdia4
Tra2a
Cycs
Hnrnpa2b1
Cbx3
Snx10
Skap2
Hoxa7
Hoxa9
Hoxa10
Hibadh
Tax1bp1
Lsm5
Nt5c3
Mad2l1
Gng12
Gadd45a
Serbp1
Rpia
Krcc1
Chmp3
Mrpl35
Immt
Vamp8
Mat2a
Capg
Tmsb10
Suclg1
Mrpl19
Pole4
Htra2
Aup1
Dctn1
Bola3
Dguok
Tex261
Cct7
Dusp11
Snrpg
Pcbp1
Snrnp27
Nfu1
Cnbp
Rab7
Rpn1
Ruvbl1
Abtb1
Mcm2
Chst13
Chchd4
Tmem43
Xpc
Lsm3
Arl6ip5
Foxp1
Edem1
Camk1
Arpc4
Emc3
Brk1
Sec13
Tmem40
Rpl32
Zfp422
Hnrnpf
Csgalnact2
Fbxl14
Atp6v1e1
Bid
Slc6a13
M6pr
Clec4a2
Clec4b2
Emg1
Phb2
Ptpn6
Grcc10
Tpi1
Usp5
Cdca3
Mlf2
Gapdh
Mrpl51
Scnn1a
Tnfrsf1a
Cd9
Ndufa9
Fkbp4
BC035044
Clec2i
Cd69
Clec12a
Lockd
H2afj
Wbp11
Arhgdib
Strap
Dera
Mgst1
Ldhb
Cmas
Lrmp
Kras
Fgfr1op2
Tm7sf3
Ergic2
2810474O19Rik
Ndufa3
Tsen34
Rps9
Pirb
Cox6b2
Rpl28
Ube2s
U2af2
Zfp787
Rps5
Trim28
Chmp2a
Sepw1
Gltscr2
Napa
C5ar1
Sae1
Tmem160
Ap2s1
Calm3
Pglyrp1
Snrpd2
Vasp
Fosb
Trappc6a
Gemin7
Clptm1
Apoe
Tomm40
Plaur
Ethe1
Cd177
Rps19
Arhgef1
Rabac1
Dedd2
Ceacam1
B3gnt8
Bckdha
Exosc5
B9d2
Tgfb1
Hnrnpul1
Egln2
Rab4b
Snrpa
Shkbp1
Psmc4
Fbl
Timm50
Rps16
Zfp36
Gmfg
Mrps12
Hnrnpl
Ech1
Eif3k
Fam98c
Psmd8
Yif1b
Spint2
Capns1
Tbcb
Polr2i
Tyrobp
Hcst
Psenen
Cox6b1
Rbm42
Tmem147
Usf2
Fxyd5
Uba2
Gpi1
Lsm14a
Pdcd5
Uri1
1600014C10Rik
Nkg7
Etfb
Cd33
Emc10
Nr1h2
Napsa
Pnkp
Prmt1
Bcl2l12
Nosip
Rps11
Rpl13a
Pih1d1
Cd37
Snrnp70
Ruvbl2
Ftl1
Bax
Nucb1
Ppp1r15a
Rpl18
Kdelr1
Emp3
Ldha
Tsg101
Mrgpra2b
Htatip2
Svip
Nipa2
Klf13
Mcee
Ndnl2
Tm2d3
Snrpa1
Vimp
Arrdc4
Akap13
Mrpl46
Mrps11
Idh2
Cib1
Fes
Iqgap1
Sec11a
Rps17
Fam103a1
Btbd1
Tm6sf1
Abhd17c
Zfand6
Ctsc
Eed
Ndufc2
Clns1a
Rps3
Spcs2
Ucp2
Mrpl48
Rab6a
Lamtor1
Pgap2
Rhog
Rrm1
Timm10b
Ilk
Taf10
Mrpl17
Eif3f
Rpl27a
Tmem9b
Eif4g2
Copb1
Psma1
1110004F10Rik
Rps13
Nucb2
Rps15a
Arl6ip1
Uqcrc2
Mettl9
Igsf6
Ndufab1
Rbbp6
Nsmce1
Eif3c
Bola2
Coro1a
Mapk3
Gdpd3
Ypel3
Ppp4c
Aldoa
Ino80e
Tmem219
Kif22
AI467606
Sept1
Dctpp1
Sephs2
Bcl7c
Bckdk
Fus
Pycard
Itgam
Rgs10
Mcmbp
Nsmce4a
Bub3
Oat
Bccip
Ptpre
Glrx3
Bnip3
Echs1
Psmd13
Ifitm2
Ifitm3
Ifitm6
Rnh1
Taldo1
Pddc1
Rplp2
Mob2
Ctsd
Lsp1
Mrpl23
Tspan32
Cd81
Cdkn1c
Nap1l4
Pcmt1
Ginm1
B230208H11Rik
Stx11
Sf3b5
Fuca2
Vta1
Cited2
Abracl
Ifngr1
Pex7
Myb
Tbpl1
Rps12
Stx7
Rnf146
Cenpw
Rwdd1
Nt5dc1
Hdac2
Rpf2
Snx3
Ostm1
Cd24a
Atg5
Asf1a
Serinc1
Pkib
Smpdl3a
Lims1
Ddit4
Anapc16
Psap
Vsir
Sar1a
Vps26a
Srgn
Reep3
Cdk1
Zwint
Snrpd3
Mif
Smarcb1
Itgb2
Sumo3
Ube2g2
Rrp1
Cstb
Tpgs1
Bsg
Rnf126
Prss57
Palm
Ptbp1
Prtn3
Elane
R3hdm4
Cnn2
Hmha1
Polr2e
Gpx4
Stk11
Atp5d
Cirbp
Ndufs7
Dazap1
Rps15
2310011J03Rik
Mbd3
Uqcr11
Tcf3
Abhd17a
Plekhj1
Sf3a2
Oaz1
Lsm7
Timm13
Gadd45b
Sgta
Map2k2
Eef2
Mrpl54
Hmg20b
Ncln
S1pr4
Aes
Nfyb
Ckap4
Tcp11l2
Rtcb
Hsp90b1
Ccdc53
Dram1
Arl1
Slc25a3
Tmpo
Lta4h
Snrpf
Metap2
Ndufa12
Mrpl42
Ube2n
Nudt4
Btg1
Ccdc59
Ppp1r12a
Rpl6l
Nap1l1
Glipr1
Atxn7l3b
Tbc1d15
Cct2
Yeats4
Lyz2
Cpsf6
Mdm2
Rap1b
Tmbim4
Llph
Tsfm
Cdk4
Tspan31
Os9
B4galnt1
Dctn2
Arhgap9
Naca
Ptges3
Atp5b
Cnpy2
Nabp2
Myl6
A430046D13Rik
Rpl41
Pa2g4
Rps26
Cdk2
Pym1
Ormdl2
Sarnp
Cd63
Bloc1s1
Pet100
Stxbp2
Mcemp1
Trappc5
Timm44
Elavl1
Carkd
Ankrd10
F10
Lamp1
Upf3a
Agpat5
Vps36
Smim19
Vdac3
Ikbkb
Golga7
Tm2d2
Lsm1
Ash2l
Hgsnat
Fnta
Eif4ebp1
Ubxn8
Gsr
Gtf2e2
Dctn6
Leprotl1
Saraf
Cnot7
Mtus1
Asah1
Frg1
Slc25a4
Acsl1
Ing2
Spcs3
Hpgd
Sap30
Hmgb2
2700029M09Rik
Tmem192
Atp6v1b2
Ndufa13
Nr2c2ap
Cope
2810428I15Rik
Uba52
Kxd1
Fkbp8
Isyna1
Ssbp4
Lsm4
Jund
Mpv17l2
Ifi30
Ccdc124
Rpl18a
Use1
Babam1
Mrpl34
Dda1
Bst2
Mvb12a
Pgls
Cyp4f18
Tpm4
Rab8a
Fam32a
Ap1m1
Gm10282
Klf2
Smim7
Sin3b
Tom1
Mcm5
Rbmxl1
Lsm6
Smarca5
Zfp330
Ndufb7
Tecr
Dnajb1
Gipc1
Ddx39
Asf1b
D8Ertd738e
Ier2
Lyl1
Gadd45gip1
Rad23a
Calr
Farsa
Syce2
Prdx2
Junb
Asna1
2310036O22Rik
Wdr83os
Man2b1
Cks1brt
Vps35
Orc6
4921524J17Rik
Dnaja2
Itfg1
Brd7
Snx20
Amfr
Nudt21
Mt1
Herpud1
Cpne2
Fam192a
Arl2bp
Ciapin1
Polr2c
Adgrg3
Cfap20
Gm10094
Got2
Gm8730
Cklf
Cbfb
Tmem208
Atp6v0d1
Acd
Nutf2
Psmb10
Gm10073
Nip7
Rps18-ps3
Rps26-ps1
Psmd7
Hp
Ist1
Aars
Znrf1
Cfdp1
Gabarapl2
Cmc2
Mphosph6
Hsbp1
Cotl1
Emc8
Cox4i1
Irf8
Map1lc3b
Cyba
Rnf166
Aprt
Trappc2l
Rpl13
Chmp1a
Tcf25
Tsnax
Tomm20
Pdhb
Thoc7
Psmd6
Il3ra
Rpl15
Ube2e1
2700060E02Rik
Dnajc9
Mrps16
Anxa7
Chchd1
Adk
Vdac2
Rps24
Anxa11
Arf4
Selk
Tkt
Prkcd
Spcs1
Smim4
Nisch
Dph3
Rpl23a-ps3
Glud1
Ghitm
Ero1l
Psmc6
Gnpnat1
Cdkn3
Cnih1
Gmfb
Lgals3
Ttc5
Osgep
Apex1
Tmem55b
Pnp
Hnrnpc
Dad1
Psmb5
Acin1
1700123O20Rik
Cebpe
Ngdn
Dhrs4
Psme1
Psme2
Nedd8
Dhrs1
Ltb4r1
Ctsg
Sap18
Mrpl57
Zdhhc20
Rpl13-ps3
Arl11
Rnaseh2b
Ctsb
Msra
Bnip3l
Ppp2r2a
Bin3
Itm2b
Sucla2
Esd
Lcp1
Tpt1
Gtf2f2
Dnajc15
Rgcc
Wbp4
Elf1
Sugt1
Mzt1
Commd6
Uchl3
Ndfip2
Gm10076
Tpm3-rs7
Dnajc3
Stk24
Ubac2
Tm9sf2
Dcun1d5
Tmem123
Cwc15
Ubl5
Pin1
Eif3g
Mrpl4
Cdc37
Cdkn2d
Dnm2
AB124611
Spc24
Rab3d
Tmem205
Elof1
Pigyl
Rp9
Sept7
Thyn1
Fli1
Dcps
Stt3a
Tbrg1
Hspa8
H2afx
Hmbs
Trappc4
Rps25
Atp5l
Pafah1b2
Rexo2
Rbm7
Rpl10-ps3
Pts
Sdhd
Timm8b
Fdx1
Rdx
Acat1
Idh3a
Wdr61
Psma4
Fbxo22
Nrg4
Etfa
Rcn2
Pstpip1
Imp3
Commd4
Cox5a
Scamp2
Csk
Ubl7
Nptn
Adpgk
Hexa
Pkm
Rplp1
Anp32a
Rpl4
Snapc5
Map2k1
Tipin
Rab11a
Spg21
Oaz2
2810417H13Rik
Ppib
Snx1
Fam96a
Rps27l
Anxa2
Bnip2
Gtf2a2
Ccnb2
Polr2m
Ccpg1
Rab27a
Rsl24d1
Arpp19
Tmod3
Fbxo9
Eef1a1
Cox7a2
Tmem30a
Fam46a
Cyb5r4
Syncrip
Mthfsl
Mthfs
Tmed3
Ctsh
Morf4l1
Plscr1
Atp1b3
Rnf7
Pxylp1
Copb2
Faim
Anapc13
Ppm1m
Twf2
Alas1
Rpl29
Manf
Mapkapk3
Rassf1
Gnai2
Rhoa
Gpx1
Impdh2
Ndufaf3
Uqcrc1
Shisa5
Tma7
Camp
Ngp
Ccdc12
Ltf
Lrrfip2
Pdcd6ip
Cmtm6
Cmtm7
Rps27rt
Stt3b
Myd88
Acaa1a
Rpsa
Eif1b
Rpl14
Higd1a
Abhd5
Exosc7
Ccr1
Ccr2
Drg1
Patz1
Pik3ip1
Selm
Tcn2
Pes1
Osm
Uqcr10
Zmat5
Ewsr1
Xbp1
Mrps24
Dbnl
Tmed4
Ppia
H2afv
Myo1g
Ccm2
Ikzf1
Sec61g
Ppp3r1
Pno1
C1d
Actr2
Rab1a
Ugp2
Mdh1
Commd1
Cct4
Smek2
Rps27a
Rtn4
Snrnp25
Npm1
Mat2b
Nudcd2
Gnb2l1
Psme2b
Mgat1
Rnf130
Canx
Hnrnph1
Clk4
Hnrnpab
Nhp2
Sar1b
Cdkn2aipnl
Ube2b
Ppp2ca
Skp1a
Vdac1
9530068E07Rik
Hspa4
Uqcrq
Cdc42se2
Hint1
Gpx3
Atox1
G3bp1
Cnot8
Mrpl22
Rnf187
Guk1
Mrpl55
Arf1
Cops3
Tmem11
Map2k3
Tnfrsf13b
Ncor1
Ubb
Stx8
Rpl26
Aurkb
Trappc1
Naa38
Trp53
Mpdu1
Cd68
Eif4a1
Tmem256
Plscr3
Acap1
Gps2
Eif5a
Gabarap
0610010K14Rik
Arrb2
Psmb6
Slc25a11
Pfn1
Spag7
C1qbp
Derl2
Txndc17
Med31
Ube2g1
Emc6
Pafah1b1
Rpa1
Pitpna
Ywhae
Fam101b
Glod4
Timm22
Blmh
Nsrp1
Flot2
Rpl23a
Sdf2
Unc119
Ift20
Lgals9
Wsb1
Gm21975
Evi2a
Crlf3
Zfp207
Psmd11
Slfn2
AI662270
1700020L24Rik
Ccl9
Ccl6
Ccl3
Wfdc17
Wfdc21
Ggnbp2
Vmp1
Supt4a
Mpo
Dynll2
Srsf1
Mrps23
Nme2
Nme1
Tob1
Lrrc59
Mrpl27
Slc35b1
Spop
Phb
Snf8
Atp5g1
Cbx1
Cdk5rap3
Psmb3
Rpl23
Rpl19
Mien1
Psmd3
Top2a
Igfbp4
Smarce1
Eif1
Acly
Dnajc7
Rab5c
Mlx
Coa3
Becn1
Psme3
Rpl27
Ifi35
Grn
Nmt1
Limd2
Psmc5
Smarcd2
Cd79b
Milr1
Ddx5
Kpna2
Psmd12
Gna13
Wipi1
Prkar1a
Slc39a11
Fam104a
Rpl38
Cd300a
Cd300lf
Slc9a3r1
Ict1
Atp5h
Nt5c
Hn1
Sumo2
Mrps7
Grb2
Smim5
Galk1
H3f3b
Wbp2
Ten1
Srp68
Ubald2
BC018473
Srsf2
Sept9
Syngr2
Tk1
Birc5
Cbx4
Eif4a3
Chmp6
1810043H04Rik
Actg1
Mrpl12
Fam195b
P4hb
Arhgdia
Alyref
Anapc11
Sirt7
Mafg
Aspscr1
Stra13
Dcxr
Slc16a3
Csnk1d
BC017643
Gdi2
Klf6
Gtpbp4
Mrpl32
Psma2
Mplkip
Elmo1
Trim27
Gm11273
Hist1h2ap
Prss16
Abt1
Hist1h2ae
Hist1h2bc
Hist1h1c
Gmnn
Acot13
Tdp2
Uqcrfs1
Serpinb1a
Bphl
Psmg4
Eci2
F13a1
Ly86
Ssr1
Txndc5
Eef1e1
Pak1ip1
Tmem14c
Nol7
Dtnbp1
Dek
Ninj1
Card19
Cks2
Gadd45g
Sfxn1
Higd2a
Hk3
Rab24
Prelid1
Lman2
Grk6
Dok3
Tmed9
Pcbd2
H2afy
Tifab
Idnk
2210016F16Rik
Hnrnpk
Fbp1
Hiatl1
Uqcrb
Nsun2
Med10
Ndufs6
Mrpl36
Clptm1l
Pdcd6
Sdha
Gm10116
Cast
Glrx
Cetn3
[truncated: 588 more rows]
