# Supplementary material for: Loss of Kat2a enhances transcriptional noise and depletes acute myeloid leukemia stem-like cells
Source: eLife journal article supplement (doi:10.7554/elife.51754), 2020-01-27
Supplement: supp [file elife-51754-supp-v1.zip › elife_poa_e51754_Supplementary_file_3.xlsx]

## Sheet: robustGeneSet_GO-BP
Analysis Type:	PANTHER Overrepresentation Test (Released 20181003)
Annotation Version and Release Date:	GO Ontology database Released 2018-09-06
Analyzed List:	Robust Gene set (Mus musculus)
Reference List:	Mus musculus (all genes in database)
Test Type:	BINOMIAL with Bonferroni correction (8557)
GO biological process complete	Reference counts	OBSERVED target counts	EXPECTED target counts	target FOLD ENRICHMENT	P-value
ENRICHED CATEGORIES
ATP synthesis coupled proton transport (GO:0015986)	21	19	2.4	7.92	1.14e-07
energy coupled proton transport, down electrochemical gradient (GO:0015985)	21	19	2.4	7.92	1.14e-07
respiratory burst (GO:0045730)	13	11	1.48	7.41	0.00422
mitochondrial electron transport, NADH to ubiquinone (GO:0006120)	16	13	1.83	7.11	0.00063
proteasomal ubiquitin-independent protein catabolic process (GO:0010499)	24	19	2.74	6.93	1.05e-06
ribosomal small subunit assembly (GO:0000028)	19	15	2.17	6.91	9.35e-05
viral translation (GO:0019081)	13	10	1.48	6.73	0.0317
mitochondrial electron transport, ubiquinol to cytochrome c (GO:0006122)	13	10	1.48	6.73	0.0317
viral budding (GO:0046755)	13	10	1.48	6.73	0.0317
mitochondrial ATP synthesis coupled electron transport (GO:0042775)	52	39	5.94	6.57	1.58e-15
cytoplasmic translation (GO:0002181)	62	46	7.08	6.5	1.47e-18
ATP synthesis coupled electron transport (GO:0042773)	56	41	6.4	6.41	4.42e-16
negative regulation of mRNA splicing, via spliceosome (GO:0048025)	24	17	2.74	6.2	4.91e-05
negative regulation of RNA splicing (GO:0033119)	29	20	3.31	6.04	3.65e-06
oxidative phosphorylation (GO:0006119)	64	44	7.31	6.02	2.04e-16
NADH dehydrogenase complex assembly (GO:0010257)	42	27	4.8	5.63	1.74e-08
mitochondrial respiratory chain complex I assembly (GO:0032981)	42	27	4.8	5.63	1.74e-08
ribosome assembly (GO:0042255)	71	44	8.11	5.43	9.13e-15
virion assembly (GO:0019068)	20	12	2.28	5.25	0.0437
negative regulation of mRNA processing (GO:0050686)	32	19	3.66	5.2	0.000105
respiratory electron transport chain (GO:0022904)	76	45	8.68	5.18	2e-14
electron transport chain (GO:0022900)	82	48	9.37	5.12	2.36e-15
translational initiation (GO:0006413)	57	33	6.51	5.07	1.12e-09
'de novo' protein folding (GO:0006458)	35	20	4	5	8.25e-05
translation (GO:0006412)	314	179	35.87	4.99	7.9e-63
energy coupled proton transmembrane transport, against electrochemical gradient (GO:0015988)	32	18	3.66	4.92	0.000557
'de novo' posttranslational protein folding (GO:0051084)	34	19	3.88	4.89	0.000269
NADP metabolic process (GO:0006739)	29	16	3.31	4.83	0.00376
protein targeting to ER (GO:0045047)	29	16	3.31	4.83	0.00376
chaperone cofactor-dependent protein refolding (GO:0051085)	29	16	3.31	4.83	0.00376
ribosomal large subunit assembly (GO:0000027)	40	22	4.57	4.81	3.05e-05
peptide biosynthetic process (GO:0043043)	333	183	38.04	4.81	5.79e-62
aerobic respiration (GO:0009060)	66	36	7.54	4.78	5.03e-10
protein targeting to mitochondrion (GO:0006626)	53	28	6.05	4.62	5.99e-07
mitochondrial respiratory chain complex assembly (GO:0033108)	73	38	8.34	4.56	4.21e-10
protein localization to endoplasmic reticulum (GO:0070972)	52	27	5.94	4.55	1.88e-06
mRNA cis splicing, via spliceosome (GO:0045292)	27	14	3.08	4.54	0.0388
tricarboxylic acid cycle (GO:0006099)	31	16	3.54	4.52	0.00886
establishment of protein localization to endoplasmic reticulum (GO:0072599)	33	17	3.77	4.51	0.00424
protein transmembrane import into intracellular organelle (GO:0044743)	39	20	4.45	4.49	0.000469
ribosomal large subunit biogenesis (GO:0042273)	84	43	9.6	4.48	1.68e-11
cell redox homeostasis (GO:0045454)	63	32	7.2	4.45	7.4e-08
ATP metabolic process (GO:0046034)	164	83	18.73	4.43	3.83e-24
ATP hydrolysis coupled transmembrane transport (GO:0090662)	30	15	3.43	4.38	0.0278
ATP hydrolysis coupled cation transmembrane transport (GO:0099132)	30	15	3.43	4.38	0.0278
ATP hydrolysis coupled ion transmembrane transport (GO:0099131)	30	15	3.43	4.38	0.0278
proton transmembrane transport (GO:1902600)	73	36	8.34	4.32	8.83e-09
purine ribonucleoside monophosphate metabolic process (GO:0009167)	189	93	21.59	4.31	1.78e-26
protein transmembrane transport (GO:0071806)	53	26	6.05	4.29	1.28e-05
chaperone-mediated protein folding (GO:0061077)	51	25	5.83	4.29	2.65e-05
purine nucleoside monophosphate metabolic process (GO:0009126)	190	93	21.7	4.28	2.61e-26
ribonucleoside monophosphate metabolic process (GO:0009161)	193	94	22.05	4.26	1.84e-26
citrate metabolic process (GO:0006101)	35	17	4	4.25	0.00933
protein localization to mitochondrion (GO:0070585)	70	34	8	4.25	5.53e-08
cellular respiration (GO:0045333)	134	65	15.31	4.25	1.95e-17
deoxyribonucleotide metabolic process (GO:0009262)	33	16	3.77	4.24	0.0195
establishment of protein localization to mitochondrion (GO:0072655)	64	31	7.31	4.24	4.9e-07
multivesicular body sorting pathway (GO:0071985)	31	15	3.54	4.24	0.0409
intracellular protein transmembrane transport (GO:0065002)	52	25	5.94	4.21	3.87e-05
purine ribonucleoside triphosphate metabolic process (GO:0009205)	190	91	21.7	4.19	5.05e-25
protein folding (GO:0006457)	142	68	16.22	4.19	4.62e-18
amide biosynthetic process (GO:0043604)	419	200	47.86	4.18	2.09e-58
peptide metabolic process (GO:0006518)	443	211	50.6	4.17	1.06e-61
ribosomal small subunit biogenesis (GO:0042274)	63	30	7.2	4.17	1.47e-06
nucleoside monophosphate metabolic process (GO:0009123)	204	97	23.3	4.16	1.31e-26
tricarboxylic acid metabolic process (GO:0072350)	40	19	4.57	4.16	0.00312
purine ribonucleoside monophosphate biosynthetic process (GO:0009168)	95	45	10.85	4.15	5.71e-11
purine nucleoside monophosphate biosynthetic process (GO:0009127)	95	45	10.85	4.15	5.71e-11
ATP biosynthetic process (GO:0006754)	74	35	8.45	4.14	5.61e-08
purine nucleoside triphosphate metabolic process (GO:0009144)	199	94	22.73	4.14	1.69e-25
purine nucleoside triphosphate biosynthetic process (GO:0009145)	85	40	9.71	4.12	2.14e-09
nucleoside triphosphate metabolic process (GO:0009141)	215	101	24.56	4.11	2.08e-27
ribonucleoside triphosphate metabolic process (GO:0009199)	194	91	22.16	4.11	2.17e-24
positive regulation of RNA splicing (GO:0033120)	47	22	5.37	4.1	0.000499
regulation of mRNA splicing, via spliceosome (GO:0048024)	103	48	11.77	4.08	1.34e-11
ribonucleoside monophosphate biosynthetic process (GO:0009156)	99	46	11.31	4.07	5.68e-11
purine ribonucleoside triphosphate biosynthetic process (GO:0009206)	84	39	9.6	4.06	6.33e-09
nucleoside monophosphate biosynthetic process (GO:0009124)	106	48	12.11	3.96	3.81e-11
nucleoside triphosphate biosynthetic process (GO:0009142)	98	44	11.19	3.93	6.84e-10
ribonucleoside triphosphate biosynthetic process (GO:0009201)	87	39	9.94	3.92	1.79e-08
regulation of alternative mRNA splicing, via spliceosome (GO:0000381)	59	26	6.74	3.86	0.000109
ribonucleoprotein complex assembly (GO:0022618)	210	91	23.99	3.79	5.1e-22
regulation of RNA splicing (GO:0043484)	137	59	15.65	3.77	2.75e-13
positive regulation of viral life cycle (GO:1903902)	56	24	6.4	3.75	0.000639
negative regulation of mRNA metabolic process (GO:1903312)	75	32	8.57	3.74	5.32e-06
regulation of response to endoplasmic reticulum stress (GO:1905897)	68	29	7.77	3.73	3.33e-05
positive regulation of viral process (GO:0048524)	81	34	9.25	3.67	2.38e-06
ribonucleoprotein complex subunit organization (GO:0071826)	223	93	25.47	3.65	2.07e-21
viral life cycle (GO:0019058)	65	27	7.42	3.64	0.00019
mRNA splicing, via spliceosome (GO:0000398)	182	75	20.79	3.61	1.71e-16
RNA splicing, via transesterification reactions with bulged adenosine as nucleophile (GO:0000377)	182	75	20.79	3.61	1.71e-16
RNA splicing, via transesterification reactions (GO:0000375)	182	75	20.79	3.61	1.71e-16
mitochondrial transmembrane transport (GO:1990542)	66	27	7.54	3.58	0.000258
ER to Golgi vesicle-mediated transport (GO:0006888)	115	47	13.14	3.58	2.65e-09
ribosome biogenesis (GO:0042254)	272	111	31.07	3.57	2.69e-25
rRNA processing (GO:0006364)	185	73	21.13	3.45	5.5e-15
apoptotic mitochondrial changes (GO:0008637)	66	26	7.54	3.45	0.000943
viral process (GO:0016032)	125	49	14.28	3.43	3.71e-09
energy derivation by oxidation of organic compounds (GO:0015980)	194	76	22.16	3.43	1.57e-15
RNA splicing (GO:0008380)	309	121	35.3	3.43	3.02e-26
ribonucleoprotein complex biogenesis (GO:0022613)	405	157	46.26	3.39	1.94e-34
regulation of mRNA processing (GO:0050684)	140	54	15.99	3.38	4.57e-10
cellular response to topologically incorrect protein (GO:0035967)	78	30	8.91	3.37	0.000175
positive regulation of intrinsic apoptotic signaling pathway (GO:2001244)	63	24	7.2	3.33	0.00509
ribonucleoprotein complex export from nucleus (GO:0071426)	63	24	7.2	3.33	0.00509
nicotinamide nucleotide metabolic process (GO:0046496)	105	40	11.99	3.33	1.13e-06
ubiquitin-dependent ERAD pathway (GO:0030433)	61	23	6.97	3.3	0.0102
cellular amide metabolic process (GO:0043603)	650	245	74.25	3.3	1.02e-53
rRNA metabolic process (GO:0016072)	207	78	23.65	3.3	4.59e-15
purine ribonucleotide biosynthetic process (GO:0009152)	154	58	17.59	3.3	1.45e-10
ERAD pathway (GO:0036503)	80	30	9.14	3.28	0.000301
interaction with symbiont (GO:0051702)	72	27	8.22	3.28	0.00142
ribonucleoprotein complex localization (GO:0071166)	64	24	7.31	3.28	0.00667
mitochondrial transport (GO:0006839)	155	58	17.71	3.28	1.9e-10
pyridine nucleotide metabolic process (GO:0019362)	107	40	12.22	3.27	1.93e-06
RNA export from nucleus (GO:0006405)	67	25	7.65	3.27	0.00435
modification by host of symbiont morphology or physiology (GO:0051851)	67	25	7.65	3.27	0.00435
cellular response to unfolded protein (GO:0034620)	59	22	6.74	3.26	0.0206
ribose phosphate biosynthetic process (GO:0046390)	170	63	19.42	3.24	2.26e-11
regulation of telomere maintenance via telomere lengthening (GO:1904356)	57	21	6.51	3.23	0.0412
ribonucleotide biosynthetic process (GO:0009260)	163	60	18.62	3.22	1.36e-10
response to topologically incorrect protein (GO:0035966)	112	41	12.79	3.2	2.13e-06
response to unfolded protein (GO:0006986)	91	33	10.39	3.17	0.000141
regulation of signal transduction by p53 class mediator (GO:1901796)	69	25	7.88	3.17	0.00731
generation of precursor metabolites and energy (GO:0006091)	265	96	30.27	3.17	5.7e-18
purine nucleotide biosynthetic process (GO:0006164)	164	59	18.73	3.15	5.78e-10
nuclear-transcribed mRNA catabolic process (GO:0000956)	92	33	10.51	3.14	0.000181
pyridine-containing compound metabolic process (GO:0072524)	112	40	12.79	3.13	6.96e-06
positive regulation of mitotic cell cycle phase transition (GO:1901992)	73	26	8.34	3.12	0.0061
ribose phosphate metabolic process (GO:0019693)	360	128	41.12	3.11	3.95e-24
purine ribonucleotide metabolic process (GO:0009150)	335	117	38.27	3.06	3.43e-21
purine-containing compound biosynthetic process (GO:0072522)	169	59	19.3	3.06	1.97e-09
positive regulation of translation (GO:0045727)	109	38	12.45	3.05	3.42e-05
nucleotide metabolic process (GO:0009117)	457	159	52.2	3.05	1.18e-29
ribonucleotide metabolic process (GO:0009259)	345	120	39.41	3.04	1.17e-21
symbiont process (GO:0044403)	213	74	24.33	3.04	2.39e-12
positive regulation of DNA biosynthetic process (GO:2000573)	72	25	8.22	3.04	0.0154
mRNA processing (GO:0006397)	389	135	44.44	3.04	1.26e-24
nucleoside phosphate metabolic process (GO:0006753)	465	160	53.12	3.01	2.49e-29
nucleotide biosynthetic process (GO:0009165)	208	71	23.76	2.99	2.24e-11
regulation of intrinsic apoptotic signaling pathway (GO:2001242)	167	57	19.08	2.99	1.19e-08
purine nucleotide metabolic process (GO:0006163)	352	120	40.21	2.98	6.07e-21
protein targeting (GO:0006605)	195	66	22.27	2.96	3.08e-10
negative regulation of cellular protein catabolic process (GO:1903363)	80	27	9.14	2.95	0.0103
modification of morphology or physiology of other organism involved in symbiotic interaction (GO:0051817)	86	29	9.82	2.95	0.00431
negative regulation of intrinsic apoptotic signaling pathway (GO:2001243)	98	33	11.19	2.95	0.000758
response to endoplasmic reticulum stress (GO:0034976)	185	62	21.13	2.93	2.73e-09
nucleoside phosphate biosynthetic process (GO:1901293)	215	72	24.56	2.93	3.62e-11
mitochondrial membrane organization (GO:0007006)	93	31	10.62	2.92	0.00227
oxidoreduction coenzyme metabolic process (GO:0006733)	123	41	14.05	2.92	2.98e-05
mRNA metabolic process (GO:0016071)	508	168	58.03	2.9	5.43e-29
cytoskeleton-dependent cytokinesis (GO:0061640)	76	25	8.68	2.88	0.0386
nucleobase-containing small molecule metabolic process (GO:0055086)	524	171	59.86	2.86	6.65e-29
cytokinesis (GO:0000910)	86	28	9.82	2.85	0.013
cellular protein-containing complex assembly (GO:0034622)	706	228	80.65	2.83	4.81e-39
protein export from nucleus (GO:0006611)	90	29	10.28	2.82	0.0104
positive regulation of cellular amide metabolic process (GO:0034250)	128	41	14.62	2.8	8.85e-05
mRNA catabolic process (GO:0006402)	113	36	12.91	2.79	0.000768
mitochondrion organization (GO:0007005)	380	121	43.41	2.79	9.61e-19
purine-containing compound metabolic process (GO:0072521)	391	124	44.66	2.78	3.92e-19
regulation of mRNA metabolic process (GO:1903311)	234	74	26.73	2.77	2.51e-10
positive regulation of cell cycle phase transition (GO:1901989)	86	27	9.82	2.75	0.038
RNA localization (GO:0006403)	160	50	18.28	2.74	5.15e-06
RNA processing (GO:0006396)	728	226	83.16	2.72	4.26e-36
regulation of DNA biosynthetic process (GO:2000278)	113	35	12.91	2.71	0.00219
regulation of viral life cycle (GO:1903900)	136	42	15.54	2.7	0.000161
nucleobase-containing small molecule biosynthetic process (GO:0034404)	120	37	13.71	2.7	0.00113
regulation of viral process (GO:0050792)	172	53	19.65	2.7	2.59e-06
establishment of protein localization to organelle (GO:0072594)	270	83	30.84	2.69	3.18e-11
protein stabilization (GO:0050821)	160	49	18.28	2.68	1.44e-05
nuclear export (GO:0051168)	98	30	11.19	2.68	0.019
organonitrogen compound biosynthetic process (GO:1901566)	1088	330	124.28	2.66	9.17e-53
regulation of symbiosis, encompassing mutualism through parasitism (GO:0043903)	208	63	23.76	2.65	1.15e-07
proteasome-mediated ubiquitin-dependent protein catabolic process (GO:0043161)	271	82	30.96	2.65	1.07e-10
positive regulation of chromosome organization (GO:2001252)	172	52	19.65	2.65	7.15e-06
maintenance of protein location (GO:0045185)	103	31	11.77	2.63	0.0182
RNA transport (GO:0050658)	140	42	15.99	2.63	0.000351
nucleic acid transport (GO:0050657)	140	42	15.99	2.63	0.000351
proteasomal protein catabolic process (GO:0010498)	300	90	34.27	2.63	8.99e-12
antibiotic metabolic process (GO:0016999)	117	35	13.36	2.62	0.0048
positive regulation of peptidase activity (GO:0010952)	155	46	17.71	2.6	0.000112
establishment of RNA localization (GO:0051236)	142	42	16.22	2.59	0.000512
positive regulation of cysteine-type endopeptidase activity involved in apoptotic process (GO:0043280)	115	34	13.14	2.59	0.00889
cellular response to reactive oxygen species (GO:0034614)	105	31	11.99	2.58	0.0267
Golgi vesicle transport (GO:0048193)	244	72	27.87	2.58	1.36e-08
positive regulation of apoptotic signaling pathway (GO:2001235)	177	52	20.22	2.57	1.84e-05
regulation of cellular protein catabolic process (GO:1903362)	229	67	26.16	2.56	1.14e-07
interspecies interaction between organisms (GO:0044419)	274	80	31.3	2.56	1.36e-09
negative regulation of protein catabolic process (GO:0042177)	124	36	14.16	2.54	0.00659
RNA catabolic process (GO:0006401)	138	40	15.76	2.54	0.00173
protein import (GO:0017038)	150	43	17.13	2.51	0.000832
positive regulation of endopeptidase activity (GO:0010950)	148	42	16.91	2.48	0.00151
regulation of mitochondrion organization (GO:0010821)	127	36	14.51	2.48	0.0113
regulation of protein stability (GO:0031647)	255	72	29.13	2.47	9.69e-08
regulation of proteasomal protein catabolic process (GO:0061136)	167	47	19.08	2.46	0.00037
establishment of protein localization to membrane (GO:0090150)	161	45	18.39	2.45	0.000856
positive regulation of intracellular protein transport (GO:0090316)	140	39	15.99	2.44	0.00634
ncRNA processing (GO:0034470)	332	92	37.92	2.43	3.98e-10
negative regulation of cellular catabolic process (GO:0031330)	229	63	26.16	2.41	4.93e-06
regulation of translation (GO:0006417)	302	83	34.5	2.41	1.03e-08
protein localization to organelle (GO:0033365)	561	154	64.08	2.4	2.32e-18
intracellular protein transport (GO:0006886)	707	194	80.76	2.4	6.57e-24
regulation of proteolysis involved in cellular protein catabolic process (GO:1903050)	197	54	22.5	2.4	9.07e-05
positive regulation of multi-organism process (GO:0043902)	168	46	19.19	2.4	0.0011
mitotic nuclear division (GO:0140014)	136	37	15.54	2.38	0.0204
nucleobase-containing compound transport (GO:0015931)	170	46	19.42	2.37	0.00153
drug metabolic process (GO:0017144)	536	145	61.23	2.37	1.44e-16
regulation of cysteine-type endopeptidase activity involved in apoptotic process (GO:0043281)	196	53	22.39	2.37	0.00019
nucleobase-containing compound catabolic process (GO:0034655)	260	70	29.7	2.36	1.38e-06
regulation of intracellular protein transport (GO:0033157)	220	59	25.13	2.35	4.19e-05
endosomal transport (GO:0016197)	183	49	20.9	2.34	0.000841
regulation of actin filament polymerization (GO:0030833)	157	42	17.93	2.34	0.00678
protein catabolic process (GO:0030163)	600	160	68.54	2.33	5.51e-18
positive regulation of mitotic cell cycle (GO:0045931)	158	42	18.05	2.33	0.00794
myeloid cell differentiation (GO:0030099)	226	60	25.82	2.32	4.46e-05
regulation of cellular amide metabolic process (GO:0034248)	347	92	39.64	2.32	4.47e-09
cellular protein catabolic process (GO:0044257)	547	145	62.48	2.32	8.26e-16
cellular macromolecule catabolic process (GO:0044265)	708	186	80.88	2.3	1.09e-20
modification-dependent macromolecule catabolic process (GO:0043632)	472	124	53.92	2.3	7.67e-13
modification-dependent protein catabolic process (GO:0019941)	461	121	52.66	2.3	1.94e-12
cofactor metabolic process (GO:0051186)	425	111	48.55	2.29	4.68e-11
proteolysis involved in cellular protein catabolic process (GO:0051603)	529	138	60.43	2.28	2.37e-14
regulation of cysteine-type endopeptidase activity (GO:2000116)	219	57	25.02	2.28	0.000205
macromolecule catabolic process (GO:0009057)	801	208	91.5	2.27	6.56e-23
negative regulation of catabolic process (GO:0009895)	274	71	31.3	2.27	5.02e-06
cellular component disassembly (GO:0022411)	193	50	22.05	2.27	0.00164
DNA conformation change (GO:0071103)	174	45	19.88	2.26	0.00683
protein-containing complex assembly (GO:0065003)	1319	341	150.67	2.26	6.94e-40
ubiquitin-dependent protein catabolic process (GO:0006511)	449	116	51.29	2.26	2.36e-11
intrinsic apoptotic signaling pathway (GO:0097193)	155	40	17.71	2.26	0.0284
regulation of apoptotic signaling pathway (GO:2001233)	405	104	46.26	2.25	9.36e-10
maintenance of location (GO:0051235)	164	42	18.73	2.24	0.0198
positive regulation of cellular protein localization (GO:1903829)	297	76	33.93	2.24	2.19e-06
regulation of actin polymerization or depolymerization (GO:0008064)	176	45	20.1	2.24	0.00918
regulation of protein ubiquitination (GO:0031396)	189	48	21.59	2.22	0.00494
cellular response to oxidative stress (GO:0034599)	194	49	22.16	2.21	0.00442
organophosphate biosynthetic process (GO:0090407)	385	97	43.98	2.21	1.8e-08
regulation of actin filament length (GO:0030832)	179	45	20.45	2.2	0.0142
mitotic cell cycle process (GO:1903047)	430	108	49.12	2.2	1.22e-09
coenzyme metabolic process (GO:0006732)	267	67	30.5	2.2	5.15e-05
intracellular transport (GO:0046907)	1174	294	134.11	2.19	2.66e-31
protein-DNA complex subunit organization (GO:0071824)	168	42	19.19	2.19	0.0352
cell division (GO:0051301)	472	118	53.92	2.19	1.23e-10
cofactor biosynthetic process (GO:0051188)	180	45	20.56	2.19	0.0163
posttranscriptional regulation of gene expression (GO:0010608)	396	99	45.24	2.19	1.64e-08
organophosphate metabolic process (GO:0019637)	778	194	88.87	2.18	3.51e-19
cellular nitrogen compound catabolic process (GO:0044270)	297	74	33.93	2.18	1.14e-05
positive regulation of intracellular transport (GO:0032388)	205	51	23.42	2.18	0.00405
regulation of protein catabolic process (GO:0042176)	366	91	41.81	2.18	1.69e-07
negative regulation of apoptotic signaling pathway (GO:2001234)	226	56	25.82	2.17	0.0013
regulation of protein polymerization (GO:0032271)	210	52	23.99	2.17	0.00361
protein-containing complex subunit organization (GO:0043933)	1503	372	171.69	2.17	6.5e-40
protein transport (GO:0015031)	1168	289	133.42	2.17	7.94e-30
establishment of protein localization (GO:0045184)	1250	309	142.79	2.16	3.86e-32
DNA replication (GO:0006260)	170	42	19.42	2.16	0.0466
response to oxidative stress (GO:0006979)	336	83	38.38	2.16	1.73e-06
regulation of protein modification by small protein conjugation or removal (GO:1903320)	219	54	25.02	2.16	0.00248
nucleocytoplasmic transport (GO:0006913)	203	50	23.19	2.16	0.0069
nuclear transport (GO:0051169)	203	50	23.19	2.16	0.0069
positive regulation of proteolysis (GO:0045862)	315	77	35.98	2.14	1.21e-05
heterocycle catabolic process (GO:0046700)	303	74	34.61	2.14	2.6e-05
regulation of mitotic cell cycle phase transition (GO:1901990)	246	60	28.1	2.14	0.000807
aromatic compound catabolic process (GO:0019439)	317	77	36.21	2.13	1.58e-05
peptide transport (GO:0015833)	1194	290	136.39	2.13	1.28e-28
regulation of cellular protein localization (GO:1903827)	504	122	57.57	2.12	3.87e-10
positive regulation of protein complex assembly (GO:0031334)	228	55	26.04	2.11	0.00377
positive regulation of organelle organization (GO:0010638)	564	136	64.43	2.11	1.75e-11
cellular protein localization (GO:0034613)	1295	312	147.93	2.11	1.59e-30
amide transport (GO:0042886)	1213	292	138.56	2.11	3.25e-28
cellular macromolecule localization (GO:0070727)	1302	313	148.73	2.1	1.8e-30
ncRNA metabolic process (GO:0034660)	429	103	49	2.1	5.85e-08
mitotic cell cycle (GO:0000278)	504	121	57.57	2.1	8.46e-10
carbohydrate derivative metabolic process (GO:1901135)	838	201	95.73	2.1	4.23e-18
regulation of cell cycle phase transition (GO:1901987)	276	66	31.53	2.09	0.000386
organonitrogen compound catabolic process (GO:1901565)	843	200	96.3	2.08	1.78e-17
positive regulation of cell cycle process (GO:0090068)	237	56	27.07	2.07	0.00558
carbohydrate derivative biosynthetic process (GO:1901137)	472	111	53.92	2.06	3.08e-08
positive regulation of DNA metabolic process (GO:0051054)	230	54	26.27	2.06	0.0105
regulation of cellular catabolic process (GO:0031329)	645	151	73.68	2.05	5.27e-12
establishment of localization in cell (GO:0051649)	1403	326	160.27	2.03	2.84e-29
apoptotic process (GO:0006915)	795	184	90.81	2.03	9.06e-15
organic cyclic compound catabolic process (GO:1901361)	346	80	39.52	2.02	6.38e-05
vesicle organization (GO:0016050)	217	50	24.79	2.02	0.042
positive regulation of cell cycle (GO:0045787)	359	82	41.01	2	7.02e-05
DEPLETED CATEGORIES
sensory perception of chemical stimulus (GO:0007606)	1197	2	136.73	0.01	8.28e-54
complement activation, classical pathway (GO:0006958)	215	2	24.56	0.08	5.46e-05
humoral immune response mediated by circulating immunoglobulin (GO:0002455)	219	2	25.02	0.08	3.57e-05
phagocytosis, recognition (GO:0006910)	202	3	23.07	0.13	0.00176
sensory perception (GO:0007600)	1578	26	180.26	0.14	4.17e-45
complement activation (GO:0006956)	227	5	25.93	0.19	0.00514
protein activation cascade (GO:0072376)	241	6	27.53	0.22	0.0066
G protein-coupled receptor signaling pathway (GO:0007186)	1818	52	207.67	0.25	1.79e-36
nervous system process (GO:0050877)	2008	61	229.37	0.27	1.36e-38
Unclassified (UNCLASSIFIED)	1794	70	204.93	0.34	0
system process (GO:0003008)	2482	106	283.52	0.37	9.04e-33
