# Supplementary material for: Loss of Kat2a enhances transcriptional noise and depletes acute myeloid leukemia stem-like cells
Source: eLife journal article supplement (doi:10.7554/elife.51754), 2020-01-27
Supplement: supp [file elife-51754-supp-v1.zip › elife_poa_e51754_Supplementary_file_4.xlsx]

## Sheet: cluster2_D3Ediff_WTvsKO
Analysis Type:	PANTHER Overrepresentation Test (Released 20190711)
Annotation Version and Release Date:	GO Ontology database Released 2019-10-08
Analyzed List:	cluster2_D3Ediff_WTvsKO (850 genes)
Reference List:	Mus musculus (22296 genes)
Test Type:	BINOMIAL
Correction:	BONFERRONI
Bonferroni count:	8824
GO biological process complete	Reference counts	OBSERVED target counts	EXPECTED target counts	target FOLD ENRICHMENT	P-value
ENRICHED CATEGORIES
mitochondrial ATP synthesis coupled electron transport (GO:0042775)	51	16	1.89	8.46	1.73e-06
ATP synthesis coupled electron transport (GO:0042773)	55	16	2.04	7.84	5.04e-06
negative regulation of fibroblast proliferation (GO:0048147)	35	10	1.3	7.7	0.00987
oxidative phosphorylation (GO:0006119)	74	21	2.74	7.65	1.7e-08
electron transport chain (GO:0022900)	78	20	2.89	6.91	3.34e-07
respiratory electron transport chain (GO:0022904)	74	18	2.74	6.56	7.11e-06
ribosome assembly (GO:0042255)	66	16	2.45	6.54	6.41e-05
cytoplasmic translation (GO:0002181)	67	16	2.49	6.44	7.88e-05
nucleoside triphosphate biosynthetic process (GO:0009142)	57	12	2.11	5.68	0.0201
positive regulation of protein import (GO:1904591)	58	12	2.15	5.58	0.024
ribosomal large subunit biogenesis (GO:0042273)	84	17	3.12	5.46	0.000294
protein folding (GO:0006457)	147	29	5.45	5.32	8.68e-09
cellular respiration (GO:0045333)	128	25	4.75	5.27	3.89e-07
translation (GO:0006412)	308	55	11.42	4.81	4.54e-17
viral life cycle (GO:0019058)	73	13	2.71	4.8	0.0465
viral process (GO:0016032)	131	23	4.86	4.73	1.7e-05
negative regulation of mRNA metabolic process (GO:1903312)	82	14	3.04	4.6	0.0329
peptide biosynthetic process (GO:0043043)	328	56	12.17	4.6	1.49e-16
nuclear-transcribed mRNA catabolic process (GO:0000956)	94	16	3.49	4.59	0.0071
ribonucleoprotein complex assembly (GO:0022618)	167	28	6.19	4.52	8.53e-07
positive regulation of protein localization to nucleus (GO:1900182)	84	14	3.12	4.49	0.0431
ribonucleoprotein complex subunit organization (GO:0071826)	174	29	6.45	4.49	4.54e-07
ATP metabolic process (GO:0046034)	170	28	6.31	4.44	1.27e-06
energy derivation by oxidation of organic compounds (GO:0015980)	190	31	7.05	4.4	1.66e-07
peptide metabolic process (GO:0006518)	450	69	16.69	4.13	1.57e-18
amide biosynthetic process (GO:0043604)	422	62	15.65	3.96	1.83e-15
mRNA catabolic process (GO:0006402)	119	17	4.41	3.85	0.0333
positive regulation of chromosome organization (GO:2001252)	190	27	7.05	3.83	5.88e-05
generation of precursor metabolites and energy (GO:0006091)	285	39	10.57	3.69	8.09e-08
response to endoplasmic reticulum stress (GO:0034976)	208	28	7.72	3.63	9.67e-05
RNA splicing (GO:0008380)	319	43	11.83	3.63	1.12e-08
mitochondrial transport (GO:0006839)	179	24	6.64	3.61	0.00114
regulation of RNA splicing (GO:0043484)	144	19	5.34	3.56	0.0284
mRNA splicing, via spliceosome (GO:0000398)	197	26	7.31	3.56	0.00047
RNA splicing, via transesterification reactions with bulged adenosine as nucleophile (GO:0000377)	197	26	7.31	3.56	0.00047
RNA splicing, via transesterification reactions (GO:0000375)	197	26	7.31	3.56	0.00047
RNA catabolic process (GO:0006401)	147	19	5.45	3.48	0.038
rRNA processing (GO:0006364)	199	25	7.38	3.39	0.00208
ribonucleoprotein complex biogenesis (GO:0022613)	398	50	14.76	3.39	2.13e-09
regulation of proteasomal protein catabolic process (GO:0061136)	184	23	6.82	3.37	0.00679
RNA localization (GO:0006403)	169	21	6.27	3.35	0.0222
ribosome biogenesis (GO:0042254)	290	36	10.76	3.35	6.71e-06
cellular amide metabolic process (GO:0043603)	664	82	24.63	3.33	8.37e-17
symbiotic process (GO:0044403)	229	28	8.49	3.3	0.000692
mRNA metabolic process (GO:0016071)	532	65	19.73	3.29	1.77e-12
cellular protein-containing complex assembly (GO:0034622)	650	79	24.11	3.28	1.12e-15
positive regulation of apoptotic signaling pathway (GO:2001235)	183	22	6.79	3.24	0.0218
rRNA metabolic process (GO:0016072)	208	25	7.72	3.24	0.00461
cellular component disassembly (GO:0022411)	206	24	7.64	3.14	0.0132
mRNA processing (GO:0006397)	406	46	15.06	3.05	5.73e-07
regulation of cellular protein catabolic process (GO:1903362)	248	28	9.2	3.04	0.00335
regulation of proteolysis involved in cellular protein catabolic process (GO:1903050)	214	24	7.94	3.02	0.025
regulation of mRNA metabolic process (GO:1903311)	255	28	9.46	2.96	0.00573
gene expression (GO:0010467)	1617	175	59.98	2.92	1.77e-33
positive regulation of cellular protein localization (GO:1903829)	306	33	11.35	2.91	0.000883
posttranscriptional regulation of gene expression (GO:0010608)	428	46	15.88	2.9	3.03e-06
RNA processing (GO:0006396)	756	81	28.04	2.89	4.87e-13
negative regulation of cellular catabolic process (GO:0031330)	243	26	9.01	2.88	0.0226
positive regulation of cell cycle process (GO:0090068)	253	27	9.38	2.88	0.0153
regulation of translation (GO:0006417)	334	35	12.39	2.83	0.000717
negative regulation of catabolic process (GO:0009895)	303	31	11.24	2.76	0.00641
cellular nitrogen compound biosynthetic process (GO:0044271)	1115	114	41.36	2.76	3.68e-18
ncRNA processing (GO:0034470)	343	35	12.72	2.75	0.00133
protein-containing complex assembly (GO:0065003)	1109	112	41.13	2.72	2.26e-17
mitochondrion organization (GO:0007005)	390	39	14.47	2.7	0.000439
protein-containing complex subunit organization (GO:0043933)	1248	124	46.29	2.68	4.57e-19
regulation of apoptotic signaling pathway (GO:2001233)	414	41	15.36	2.67	0.000258
regulation of cellular amide metabolic process (GO:0034248)	385	38	14.28	2.66	0.000899
macromolecule biosynthetic process (GO:0009059)	1230	119	45.62	2.61	3.18e-17
cellular macromolecule biosynthetic process (GO:0034645)	1196	115	44.36	2.59	2.58e-16
RNA metabolic process (GO:0016070)	1234	118	45.77	2.58	1.18e-16
positive regulation of cell cycle (GO:0045787)	356	34	13.2	2.57	0.00863
interspecies interaction between organisms (GO:0044419)	318	30	11.8	2.54	0.0468
regulation of cellular protein localization (GO:1903827)	558	52	20.7	2.51	2.68e-05
regulation of cellular catabolic process (GO:0031329)	695	64	25.78	2.48	6.15e-07
regulation of intracellular transport (GO:0032386)	352	32	13.06	2.45	0.0483
cellular macromolecule catabolic process (GO:0044265)	761	69	28.23	2.44	2.08e-07
apoptotic process (GO:0006915)	806	73	29.9	2.44	5.57e-08
organonitrogen compound biosynthetic process (GO:1901566)	1073	96	39.8	2.41	3.95e-11
ncRNA metabolic process (GO:0034660)	419	37	15.54	2.38	0.0176
programmed cell death (GO:0012501)	843	74	31.27	2.37	1.64e-07
macromolecule catabolic process (GO:0009057)	858	75	31.82	2.36	1.44e-07
cellular nitrogen compound metabolic process (GO:0034641)	2791	244	103.52	2.36	2.61e-34
nucleic acid metabolic process (GO:0090304)	1770	152	65.65	2.32	3.8e-18
positive regulation of organelle organization (GO:0010638)	596	51	22.11	2.31	0.000548
regulation of catabolic process (GO:0009894)	840	72	31.16	2.31	8.82e-07
modification-dependent macromolecule catabolic process (GO:0043632)	505	43	18.73	2.3	0.00678
cellular protein catabolic process (GO:0044257)	585	50	21.7	2.3	0.000765
proteolysis involved in cellular protein catabolic process (GO:0051603)	566	48	20.99	2.29	0.00174
cell death (GO:0008219)	882	75	32.72	2.29	5e-07
intracellular transport (GO:0046907)	1173	99	43.51	2.28	4.76e-10
cell division (GO:0051301)	480	40	17.8	2.25	0.0273
oxidation-reduction process (GO:0055114)	781	65	28.97	2.24	2.33e-05
modification-dependent protein catabolic process (GO:0019941)	495	41	18.36	2.23	0.0238
protein localization to organelle (GO:0033365)	620	51	23	2.22	0.00179
protein catabolic process (GO:0030163)	643	53	23.85	2.22	0.000965
nucleobase-containing compound biosynthetic process (GO:0034654)	649	53	24.07	2.2	0.00128
regulation of cellular localization (GO:0060341)	835	68	30.97	2.2	2.32e-05
nucleobase-containing compound metabolic process (GO:0006139)	2194	178	81.38	2.19	2.03e-19
cellular biosynthetic process (GO:0044249)	1984	156	73.59	2.12	3.84e-15
intracellular protein transport (GO:0006886)	765	60	28.38	2.11	0.000749
establishment of protein localization (GO:0045184)	1330	103	49.33	2.09	2.38e-08
heterocycle metabolic process (GO:0046483)	2331	181	86.46	2.09	8.86e-18
heterocycle biosynthetic process (GO:0018130)	714	55	26.48	2.08	0.00455
organic substance biosynthetic process (GO:1901576)	2076	160	77	2.08	7.71e-15
cellular component biogenesis (GO:0044085)	2254	173	83.61	2.07	2.96e-16
biosynthetic process (GO:0009058)	2157	165	80.01	2.06	3.87e-15
aromatic compound biosynthetic process (GO:0019438)	730	55	27.08	2.03	0.00884
cellular aromatic compound metabolic process (GO:0006725)	2405	181	89.21	2.03	2.36e-16
cell cycle process (GO:0022402)	788	59	29.23	2.02	0.00433
cellular component assembly (GO:0022607)	2025	152	75.11	2.02	6.97e-13
cellular protein metabolic process (GO:0044267)	2853	212	105.82	2	1.79e-19

## Sheet: cluster4_D3Ediff_WTvsKO
Analysis Type:	PANTHER Overrepresentation Test (Released 20190711)
Annotation Version and Release Date:	GO Ontology database Released 2019-10-08
Analyzed List:	cluster4_D3Ediff_WTvsKO (553 genes)
Reference List:	Mus musculus (22296 genes)
Test Type:	BINOMIAL
Correction:	BONFERRONI
Bonferroni count:	8824
GO biological process complete	Reference counts	OBSERVED target counts	EXPECTED target counts	target FOLD ENRICHMENT	P-value
ENRICHED CATEGORIES
cellular respiration (GO:0045333)	128	15	3.09	4.85	0.00767
translation (GO:0006412)	308	36	7.45	4.83	1.99e-10
ribonucleoprotein complex subunit organization (GO:0071826)	174	20	4.21	4.75	0.000163
ribonucleoprotein complex assembly (GO:0022618)	167	19	4.04	4.71	0.000432
peptide biosynthetic process (GO:0043043)	328	36	7.93	4.54	1.23e-09
regulation of viral life cycle (GO:1903900)	144	15	3.48	4.31	0.0316
ATP metabolic process (GO:0046034)	170	17	4.11	4.14	0.0124
energy derivation by oxidation of organic compounds (GO:0015980)	190	19	4.59	4.14	0.00302
symbiotic process (GO:0044403)	229	22	5.54	3.97	0.000716
amide biosynthetic process (GO:0043604)	422	40	10.2	3.92	5.17e-09
peptide metabolic process (GO:0006518)	450	41	10.88	3.77	9.04e-09
positive regulation of cell cycle process (GO:0090068)	253	23	6.12	3.76	0.000959
RNA splicing (GO:0008380)	319	28	7.71	3.63	8.38e-05
ribonucleoprotein complex biogenesis (GO:0022613)	398	34	9.62	3.53	4.24e-06
ribosome biogenesis (GO:0042254)	290	24	7.01	3.42	0.00272
generation of precursor metabolites and energy (GO:0006091)	285	23	6.89	3.34	0.00731
positive regulation of cell cycle (GO:0045787)	356	28	8.61	3.25	0.000796
mRNA metabolic process (GO:0016071)	532	41	12.86	3.19	1.41e-06
ncRNA processing (GO:0034470)	343	26	8.29	3.14	0.00455
interspecies interaction between organisms (GO:0044419)	318	24	7.69	3.12	0.0134
cellular protein-containing complex assembly (GO:0034622)	650	48	15.71	3.05	1.53e-07
cellular amide metabolic process (GO:0043603)	664	49	16.05	3.05	9.5e-08
mitotic cell cycle process (GO:1903047)	446	32	10.78	2.97	0.000756
mRNA processing (GO:0006397)	406	29	9.81	2.95	0.00335
RNA processing (GO:0006396)	756	54	18.28	2.95	2.67e-08
mitotic cell cycle (GO:0000278)	518	36	12.52	2.87	0.000256
posttranscriptional regulation of gene expression (GO:0010608)	428	29	10.35	2.8	0.00949
protein-containing complex assembly (GO:0065003)	1109	75	26.81	2.8	1.64e-11
gene expression (GO:0010467)	1617	109	39.09	2.79	2.11e-18
protein-containing complex subunit organization (GO:0043933)	1248	84	30.17	2.78	3.38e-13
cell division (GO:0051301)	480	32	11.6	2.76	0.00373
macromolecule biosynthetic process (GO:0009059)	1230	82	29.73	2.76	1.45e-12
cellular macromolecule biosynthetic process (GO:0034645)	1196	79	28.91	2.73	9.24e-12
cellular nitrogen compound biosynthetic process (GO:0044271)	1115	71	26.95	2.63	1.78e-09
cell cycle process (GO:0022402)	788	50	19.05	2.62	9.66e-06
regulation of cell cycle process (GO:0010564)	584	36	14.12	2.55	0.00443
regulation of mitotic cell cycle (GO:0007346)	541	32	13.08	2.45	0.0443
regulation of cellular protein localization (GO:1903827)	558	33	13.49	2.45	0.0316
RNA metabolic process (GO:0016070)	1234	73	29.83	2.45	2.54e-08
cell cycle (GO:0007049)	1189	70	28.74	2.44	9.33e-08
positive regulation of organelle organization (GO:0010638)	596	34	14.41	2.36	0.048
organonitrogen compound biosynthetic process (GO:1901566)	1073	61	25.94	2.35	8.59e-06
nucleic acid metabolic process (GO:0090304)	1770	100	42.79	2.34	1.93e-11
cellular macromolecule catabolic process (GO:0044265)	761	42	18.4	2.28	0.00862
cellular nitrogen compound metabolic process (GO:0034641)	2791	153	67.47	2.27	7.41e-19
macromolecule catabolic process (GO:0009057)	858	46	20.74	2.22	0.00568
regulation of cellular localization (GO:0060341)	835	44	20.19	2.18	0.0156
apoptotic process (GO:0006915)	806	42	19.48	2.16	0.0354
programmed cell death (GO:0012501)	843	44	20.38	2.16	0.0199
regulation of cell cycle (GO:0051726)	1000	52	24.17	2.15	0.00256
intracellular transport (GO:0046907)	1173	61	28.36	2.15	0.000219
nucleobase-containing compound metabolic process (GO:0006139)	2194	114	53.04	2.15	4.48e-11
cellular biosynthetic process (GO:0044249)	1984	102	47.96	2.13	3.32e-09
organic substance biosynthetic process (GO:1901576)	2076	107	50.19	2.13	6.45e-10
cell death (GO:0008219)	882	45	21.32	2.11	0.0273
chromosome organization (GO:0051276)	930	47	22.48	2.09	0.021
biosynthetic process (GO:0009058)	2157	108	52.14	2.07	2.99e-09
cellular component biogenesis (GO:0044085)	2254	112	54.49	2.06	1.58e-09
establishment of protein localization (GO:0045184)	1330	66	32.15	2.05	0.00032
cellular component assembly (GO:0022607)	2025	99	48.95	2.02	1.41e-07
heterocycle metabolic process (GO:0046483)	2331	114	56.35	2.02	2.56e-09

## Sheet: cluster7_D3Ediff_WTvsKO
Analysis Type:	PANTHER Overrepresentation Test (Released 20190711)
Annotation Version and Release Date:	GO Ontology database Released 2019-10-08
Analyzed List:	cluster7_D3Ediff_WTvsKO (332 genes)
Reference List:	Mus musculus (22296 genes)
Test Type:	BINOMIAL
Correction:	BONFERRONI
Bonferroni count:	8824
GO biological process complete	Reference counts	OBSERVED target counts	EXPECTED target counts	target FOLD ENRICHMENT	P-value
ENRICHED CATEGORIES
cytoplasmic translation (GO:0002181)	67	10	0.97	10.33	0.000653
oxidative phosphorylation (GO:0006119)	74	11	1.07	10.29	0.000151
electron transport chain (GO:0022900)	78	11	1.13	9.76	0.000256
ribosomal large subunit biogenesis (GO:0042273)	84	11	1.21	9.07	0.000537
ribonucleoprotein complex subunit organization (GO:0071826)	174	21	2.51	8.36	2.39e-09
ribonucleoprotein complex assembly (GO:0022618)	167	20	2.41	8.29	1.03e-08
cellular respiration (GO:0045333)	128	13	1.85	7.03	0.000634
translation (GO:0006412)	308	29	4.45	6.52	3.37e-11
RNA localization (GO:0006403)	169	15	2.44	6.15	0.000358
peptide biosynthetic process (GO:0043043)	328	29	4.74	6.12	1.62e-10
RNA transport (GO:0050658)	149	13	2.15	6.04	0.00349
nucleic acid transport (GO:0050657)	149	13	2.15	6.04	0.00349
establishment of RNA localization (GO:0051236)	151	13	2.18	5.96	0.00405
rRNA processing (GO:0006364)	199	17	2.87	5.92	7.73e-05
ribonucleoprotein complex biogenesis (GO:0022613)	398	33	5.75	5.74	1.41e-11
rRNA metabolic process (GO:0016072)	208	17	3	5.66	0.000146
peptide metabolic process (GO:0006518)	450	36	6.5	5.54	1.99e-12
energy derivation by oxidation of organic compounds (GO:0015980)	190	15	2.74	5.47	0.00158
mitochondrial transport (GO:0006839)	179	14	2.59	5.42	0.00455
nucleobase-containing compound transport (GO:0015931)	181	14	2.61	5.36	0.00518
ATP metabolic process (GO:0046034)	170	13	2.46	5.29	0.0148
mRNA splicing, via spliceosome (GO:0000398)	197	15	2.85	5.27	0.00249
RNA splicing, via transesterification reactions with bulged adenosine as nucleophile (GO:0000377)	197	15	2.85	5.27	0.00249
RNA splicing, via transesterification reactions (GO:0000375)	197	15	2.85	5.27	0.00249
ribosome biogenesis (GO:0042254)	290	22	4.19	5.25	4.35e-06
amide biosynthetic process (GO:0043604)	422	32	6.09	5.25	4.24e-10
generation of precursor metabolites and energy (GO:0006091)	285	19	4.12	4.62	0.000506
RNA splicing (GO:0008380)	319	21	4.61	4.56	0.000124
cellular amide metabolic process (GO:0043603)	664	43	9.59	4.48	3.46e-12
cellular protein-containing complex assembly (GO:0034622)	650	41	9.39	4.37	4.25e-11
ncRNA processing (GO:0034470)	343	21	4.95	4.24	0.000417
RNA processing (GO:0006396)	756	41	10.92	3.76	5.47e-09
mRNA metabolic process (GO:0016071)	532	28	7.68	3.64	5.93e-05
mRNA processing (GO:0006397)	406	21	5.86	3.58	0.00637
ncRNA metabolic process (GO:0034660)	419	21	6.05	3.47	0.0104
gene expression (GO:0010467)	1617	80	23.35	3.43	1.26e-18
protein-containing complex assembly (GO:0065003)	1109	54	16.02	3.37	5.93e-11
protein-containing complex subunit organization (GO:0043933)	1248	58	18.02	3.22	3.71e-11
cellular nitrogen compound biosynthetic process (GO:0044271)	1115	48	16.1	2.98	1.69e-07
macromolecule biosynthetic process (GO:0009059)	1230	53	17.76	2.98	1.24e-08
cellular macromolecule biosynthetic process (GO:0034645)	1196	51	17.27	2.95	5.1e-08
organonitrogen compound biosynthetic process (GO:1901566)	1073	44	15.5	2.84	5.78e-06
cellular nitrogen compound metabolic process (GO:0034641)	2791	110	40.31	2.73	9.23e-20
RNA metabolic process (GO:0016070)	1234	48	17.82	2.69	4.92e-06
nucleic acid metabolic process (GO:0090304)	1770	64	25.56	2.5	8.42e-08
nucleobase-containing compound metabolic process (GO:0006139)	2194	74	31.69	2.34	3.73e-08
cellular biosynthetic process (GO:0044249)	1984	66	28.65	2.3	1.3e-06
cellular component biogenesis (GO:0044085)	2254	75	32.55	2.3	4.9e-08
organic substance biosynthetic process (GO:1901576)	2076	68	29.98	2.27	1.23e-06
intracellular transport (GO:0046907)	1173	38	16.94	2.24	0.0313
cellular protein localization (GO:0034613)	1420	46	20.51	2.24	0.00262
cellular macromolecule localization (GO:0070727)	1427	46	20.61	2.23	0.003
cell cycle (GO:0007049)	1189	38	17.17	2.21	0.0427
heterocycle metabolic process (GO:0046483)	2331	74	33.66	2.2	6.28e-07
biosynthetic process (GO:0009058)	2157	68	31.15	2.18	6.14e-06
cellular aromatic compound metabolic process (GO:0006725)	2405	75	34.73	2.16	1.02e-06
cellular component assembly (GO:0022607)	2025	63	29.25	2.15	5.02e-05
organic cyclic compound metabolic process (GO:1901360)	2618	78	37.81	2.06	3.28e-06
macromolecule metabolic process (GO:0043170)	5065	150	73.15	2.05	3.81e-17
cellular protein metabolic process (GO:0044267)	2853	84	41.2	2.04	9.68e-07
