# Supplementary material for: Loss of Kat2a enhances transcriptional noise and depletes acute myeloid leukemia stem-like cells
Source: eLife journal article supplement (doi:10.7554/elife.51754), 2020-01-27
Supplement: supp [file elife-51754-supp-v1.zip › elife_poa_e51754_Supplementary_file_5.xlsx]

## Sheet: H3K9acTargets_ENCODE_ChIPSig
Factor	Total Genes with Factor	List1 Observed Genes (3029 Total)	List1 Q-value (Hypergeometric Test; Benjamini-Hochberg)	List1 Factor Rank
BHLHE40	7061	1510	0	1
CHD2	6510	1510	0	1
CTCF	8401	2718	0	1
GCN5	7628	1961	0	1
HCFC1	10607	2502	0	1
MAZ	8519	1944	0	1
Max	9685	2210	0	1
Mxi1	10022	2324	0	1
Myogenin_EqS_2.0pct_60hr	6966	1532	0	1
NELFe	10527	2525	0	1
Pol2	17742	2969	0	1
Pol2(phosphoS2)	6196	1419	0	1
Pol2(phosphoS2)_EqS_2.0pct_60h	10136	2331	0	1
Pol2_EqS_2.0pct_60hr	11140	2489	0	1
SIN3A	9972	2338	0	1
TBP	9942	2293	0	1
UBF	5563	1312	0	1
ZNF	6955	1744	0	1
c-Myc	5869	1390	0	1
p300	6019	2286	0	1
NRSF_EqS_2.0pct_60hr	5051	1181	0	21
Nrf2	3385	942	3.522e-301	22
Myogenin_EqS_2.0pct_24hr	6639	1347	1.35e-293	23
FLI1	3130	875	2.592e-278	24
E2F4_EqS_2.0pct_60hr	4102	998	3.023e-268	25
ETS1	4904	1092	1.1e-261	26
COREST	4501	1034	5.173e-257	27
Pol2_DMSO_2.0pct	3434	882	9.45e-251	28
GATA_DMSO_2.0pct	3576	855	2.925e-218	29
GATA	4699	976	7.182e-204	30
USF2	3461	743	6.853e-157	31
E2F4	2470	585	8.886e-141	32
CTCF_DMSO_2.0pct	4432	816	3.594e-132	33
Rad21_DMSO_2.0pct	3350	666	2.467e-121	34
MyoD_EqS_2.0pct_60hr	3771	716	8.655e-121	35
CTCF_diffProtD_24hr	3783	702	5.798e-113	36
USF_EqS_2.0pct_60hr	1885	445	1.492e-104	37
Pol2_diffProtD_24hr	2178	482	1.041e-102	38
USF	1980	455	1.178e-102	39
SRF_EqS_2.0pct_24hr	1505	381	1.142e-98	40
SMC3	4369	727	2.592e-93	41
Rad21	4763	761	2.039e-89	42
ZNF384	3890	636	5.117e-77	43
GATA1_diffProtD_24hr	1940	399	2.473e-74	44
CHD1	1466	326	6.805e-69	45
MafK	2541	443	3.942e-60	46
CEBPB	1046	245	4.578e-56	47
Max_EqS_2.0pct_60hr	1001	235	5.543e-54	48
GATA1	2091	373	9.025e-53	49
GATA1_diffProtD_3hr	1727	325	4.781e-51	50
GATA1_diffProtD_14hr	1327	273	1.74e-50	51
TCF3_EqS_2.0pct_5d	1664	313	4.195e-49	52
MyoD_EqS_2.0pct_24hr	1977	346	5.951e-47	53
GATA1_diffProtD_30hr	993	217	1.504e-44	54
ZKSCAN1	895	199	4.283e-42	55
c-Jun	1034	216	4.013e-41	56
GATA1_diffProtD_7hr	1045	201	4.657e-33	57
c-Myb	457	119	1.732e-32	58
JunD	973	181	4.691e-28	59
GATA2_diffProtD_24hr	1402	232	6.525e-28	60
CEBPB_EqS_2.0pct_60hr	740	143	3.963e-24	61
ZC3H11A	1388	211	7.923e-21	62
TAL1	2286	299	7.324e-19	63
Myogenin	233	55	4.132e-14	64
TAL1_diffProtD_24hr	545	90	9.748e-12	65
MyoD	653	96	1.48e-09	66
Myogenin_EqS_2.0pct_7d	397	56	9.662e-06	67
TCF12_EqS_2.0pct_60hr	773	81	0.004361	68
PAX5	90	12	0.02583	69
