# Supplementary material for: Loss of Kat2a enhances transcriptional noise and depletes acute myeloid leukemia stem-like cells
Source: eLife journal article supplement (doi:10.7554/elife.51754), 2020-01-27
Supplement: supp [file elife-51754-supp-v1.zip › elife_poa_e51754_Supplementary_file_6.xlsx]

## Sheet: H3K9ac_targets_GO-BP
Analysis Type:	PANTHER Overrepresentation Test (Released 20190701)
Annotation Version and Release Date:	GO Ontology database Released 2019-02-02
Analyzed List:	H3K9ac targets (2923 genes)
Reference List:	Mus musculus (22296 genes)
Test Type:	BINOMIAL
Correction:	BONFERRONI
Bonferroni count:	8673
GO biological process complete	Reference counts	OBSERVED target counts	EXPECTED target counts	target FOLD ENRICHMENT	P-value
ENRICHED CATEGORIES
organelle disassembly (GO:1903008)	59	24	7.73	3.1	0.0177
regulation of response to endoplasmic reticulum stress (GO:1905897)	73	28	9.57	2.93	0.00812
mitochondrial gene expression (GO:0140053)	74	27	9.7	2.78	0.031
macroautophagy (GO:0016236)	102	36	13.37	2.69	0.00181
vacuole organization (GO:0007033)	132	46	17.31	2.66	5.94e-05
tRNA metabolic process (GO:0006399)	164	55	21.5	2.56	8.05e-06
tRNA processing (GO:0008033)	114	38	14.95	2.54	0.00337
endoplasmic reticulum to Golgi vesicle-mediated transport (GO:0006888)	112	37	14.68	2.52	0.00584
phosphatidylinositol metabolic process (GO:0046488)	119	39	15.6	2.5	0.0036
autophagy (GO:0006914)	203	64	26.61	2.4	4.02e-06
process utilizing autophagic mechanism (GO:0061919)	203	64	26.61	2.4	4.02e-06
response to endoplasmic reticulum stress (GO:0034976)	194	61	25.43	2.4	1.12e-05
mRNA splicing, via spliceosome (GO:0000398)	187	55	24.52	2.24	0.000607
RNA splicing, via transesterification reactions with bulged adenosine as nucleophile (GO:0000377)	187	55	24.52	2.24	0.000607
RNA splicing, via transesterification reactions (GO:0000375)	187	55	24.52	2.24	0.000607
regulation of ubiquitin-dependent protein catabolic process (GO:2000058)	146	42	19.14	2.19	0.034
ncRNA processing (GO:0034470)	332	95	43.53	2.18	5.77e-08
protein targeting (GO:0006605)	207	59	27.14	2.17	0.000592
nucleobase-containing compound transport (GO:0015931)	169	48	22.16	2.17	0.0103
ribonucleoprotein complex subunit organization (GO:0071826)	219	62	28.71	2.16	0.000352
translation (GO:0006412)	311	88	40.77	2.16	5.88e-07
ribonucleoprotein complex assembly (GO:0022618)	206	58	27.01	2.15	0.00113
protein stabilization (GO:0050821)	168	47	22.02	2.13	0.0196
regulation of cellular protein catabolic process (GO:1903362)	236	66	30.94	2.13	0.000205
ncRNA metabolic process (GO:0034660)	407	113	53.36	2.12	3.9e-09
RNA splicing (GO:0008380)	310	86	40.64	2.12	2.45e-06
ribonucleoprotein complex biogenesis (GO:0022613)	404	111	52.96	2.1	1.18e-08
negative regulation of cellular catabolic process (GO:0031330)	230	63	30.15	2.09	0.00086
regulation of proteolysis involved in cellular protein catabolic process (GO:1903050)	205	56	26.88	2.08	0.00464
negative regulation of catabolic process (GO:0009895)	287	78	37.63	2.07	3.85e-05
dephosphorylation (GO:0016311)	214	58	28.06	2.07	0.00376
symbiont process (GO:0044403)	215	58	28.19	2.06	0.00435
peptide biosynthetic process (GO:0043043)	330	89	43.26	2.06	4.66e-06
RNA processing (GO:0006396)	734	197	96.23	2.05	2.26e-16
rRNA processing (GO:0006364)	183	49	23.99	2.04	0.0387
rRNA metabolic process (GO:0016072)	192	51	25.17	2.03	0.0311
mRNA processing (GO:0006397)	395	104	51.78	2.01	6.26e-07
mitochondrion organization (GO:0007005)	384	101	50.34	2.01	1.24e-06
DEPLETED CATEGORIES
sensory perception (GO:0007600)	1606	36	210.55	0.17	1.82e-48
humoral immune response (GO:0006959)	374	10	49.03	0.2	9.34e-08
G protein-coupled receptor signaling pathway (GO:0007186)	1842	65	241.49	0.27	4.96e-40
nervous system process (GO:0050877)	2040	74	267.44	0.28	1.07e-43
positive regulation of B cell activation (GO:0050871)	270	12	35.4	0.34	0.04
system process (GO:0003008)	2526	143	331.16	0.43	1.71e-30
Unclassified (UNCLASSIFIED)	1869	105	245.03	0.43	0
