# Supplementary material for: Loss of Kat2a enhances transcriptional noise and depletes acute myeloid leukemia stem-like cells
Source: eLife journal article supplement (doi:10.7554/elife.51754), 2020-01-27
Supplement: supp [file elife-51754-supp-v1.zip › elife_poa_e51754_Supplementary_file_7.xlsx]

## Sheet: H3K9acTargets_lowFburst_GO-BP
Analysis Type:	PANTHER Overrepresentation Test (Released 20190701)
Annotation Version and Release Date:	GO Ontology database Released 2019-02-02
Analyzed List:	H3K9ac targets + low freq Burst Kat2a KO (462 genes)
Reference List:	Mus musculus (22296 genes)
Test Type:	BINOMIAL
Correction:	BONFERRONI
Bonferroni count:	8673
GO biological process complete	Reference counts	OBSERVED target counts	EXPECTED target counts	target FOLD ENRICHMENT	P-value
ENRICHED CATEGORIES
cytoplasmic translation (GO:0002181)	61	10	1.26	7.91	0.00736
endoplasmic reticulum to Golgi vesicle-mediated transport (GO:0006888)	112	16	2.32	6.89	2.75e-05
regulation of response to endoplasmic reticulum stress (GO:1905897)	73	10	1.51	6.61	0.0356
peptide biosynthetic process (GO:0043043)	330	37	6.84	5.41	2.38e-12
amide biosynthetic process (GO:0043604)	418	40	8.66	4.62	2.52e-11
peptide metabolic process (GO:0006518)	441	40	9.14	4.38	1.4e-10
ribonucleoprotein complex assembly (GO:0022618)	206	18	4.27	4.22	0.00443
ribonucleoprotein complex subunit organization (GO:0071826)	219	18	4.54	3.97	0.0104
protein targeting (GO:0006605)	207	17	4.29	3.96	0.0208
symbiont process (GO:0044403)	215	17	4.46	3.82	0.0341
Golgi vesicle transport (GO:0048193)	246	19	5.1	3.73	0.0131
regulation of cellular protein catabolic process (GO:1903362)	236	18	4.89	3.68	0.0292
cellular amide metabolic process (GO:0043603)	647	47	13.41	3.51	1.9e-09
ribonucleoprotein complex biogenesis (GO:0022613)	404	29	8.37	3.46	0.000114
generation of precursor metabolites and energy (GO:0006091)	279	20	5.78	3.46	0.0212
cellular protein-containing complex assembly (GO:0034622)	681	44	14.11	3.12	4.93e-07
cellular nitrogen compound biosynthetic process (GO:0044271)	1108	68	22.96	2.96	1.84e-11
organonitrogen compound biosynthetic process (GO:1901566)	1064	64	22.05	2.9	3.36e-10
macromolecule biosynthetic process (GO:0009059)	1229	71	25.47	2.79	8e-11
intracellular protein transport (GO:0006886)	764	44	15.83	2.78	1.64e-05
cellular protein catabolic process (GO:0044257)	560	32	11.6	2.76	0.0034
cellular macromolecule biosynthetic process (GO:0034645)	1197	68	24.8	2.74	6.96e-10
proteolysis involved in cellular protein catabolic process (GO:0051603)	542	30	11.23	2.67	0.0149
protein catabolic process (GO:0030163)	616	34	12.76	2.66	0.0032
intracellular transport (GO:0046907)	1189	65	24.64	2.64	1.42e-08
protein-containing complex assembly (GO:0065003)	1318	71	27.31	2.6	2.27e-09
cellular macromolecule catabolic process (GO:0044265)	727	39	15.06	2.59	0.000891
gene expression (GO:0010467)	1585	81	32.84	2.47	5.68e-10
protein-containing complex subunit organization (GO:0043933)	1502	75	31.12	2.41	1.73e-08
macromolecule catabolic process (GO:0009057)	820	41	16.99	2.41	0.00259
establishment of localization in cell (GO:0051649)	1430	71	29.63	2.4	9.59e-08
regulation of cellular catabolic process (GO:0031329)	663	33	13.74	2.4	0.0423
cellular biosynthetic process (GO:0044249)	1962	96	40.66	2.36	2.26e-11
protein transport (GO:0015031)	1214	59	25.16	2.35	1.46e-05
cellular protein localization (GO:0034613)	1362	65	28.22	2.3	4e-06
amide transport (GO:0042886)	1260	60	26.11	2.3	2.21e-05
cellular macromolecule localization (GO:0070727)	1369	65	28.37	2.29	4.9e-06
peptide transport (GO:0015833)	1241	59	25.72	2.29	3.22e-05
organic substance biosynthetic process (GO:1901576)	2070	98	42.89	2.28	8.26e-11
biosynthetic process (GO:0009058)	2134	100	44.22	2.26	7.74e-11
establishment of protein localization (GO:0045184)	1297	60	26.88	2.23	6.3e-05
organonitrogen compound catabolic process (GO:1901565)	868	40	17.99	2.22	0.0263
cellular localization (GO:0051641)	2014	92	41.73	2.2	5.08e-09
cellular nitrogen compound metabolic process (GO:0034641)	2720	121	56.36	2.15	2.15e-12
nitrogen compound transport (GO:0071705)	1502	67	31.12	2.15	3.13e-05
cellular component biogenesis (GO:0044085)	2352	102	48.74	2.09	4.71e-09
protein localization (GO:0008104)	1882	81	39	2.08	2.86e-06
cellular protein metabolic process (GO:0044267)	2859	120	59.24	2.03	1.98e-10
organic substance catabolic process (GO:1901575)	1394	58	28.89	2.01	0.00394
macromolecule localization (GO:0033036)	2177	90	45.11	2	1.85e-06
cellular component assembly (GO:0022607)	2144	89	44.43	2	1.95e-06
DEPLETED CATEGORIES
system process (GO:0003008)	2526	15	52.34	0.29	1.95e-06
Unclassified (UNCLASSIFIED)	1869	14	38.73	0.36	0
