# Supplementary figures and images for: Loss of Kat2a enhances transcriptional noise and depletes acute myeloid leukemia stem-like cells
Source: eLife journal article supplement (doi:10.7554/elife.51754), 2020-01-27

Figure 5 - figure supplement 1

A

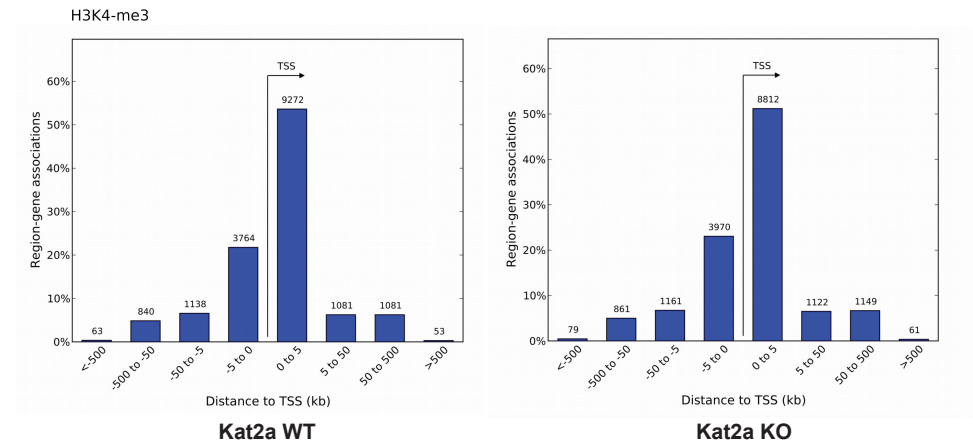

B

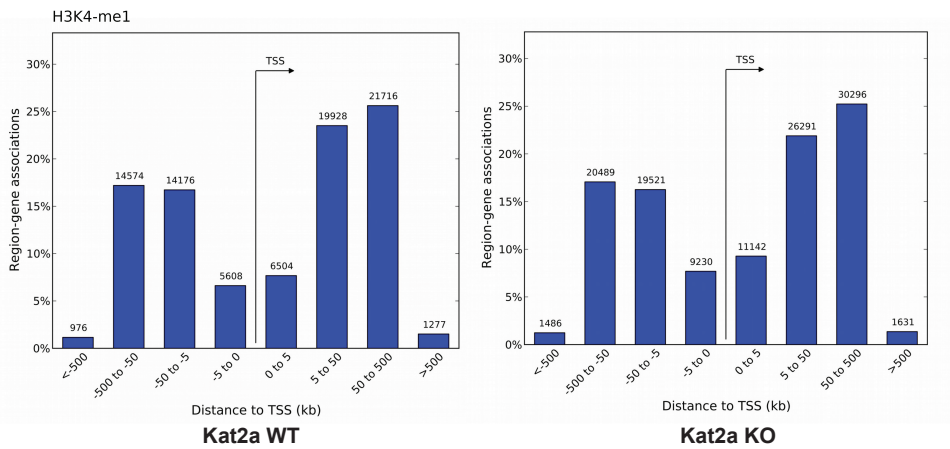

C

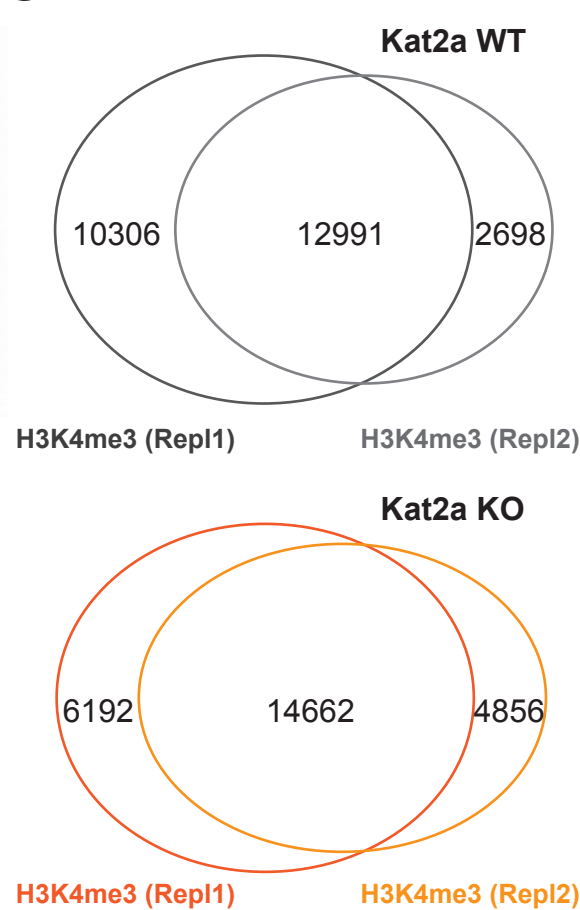

D

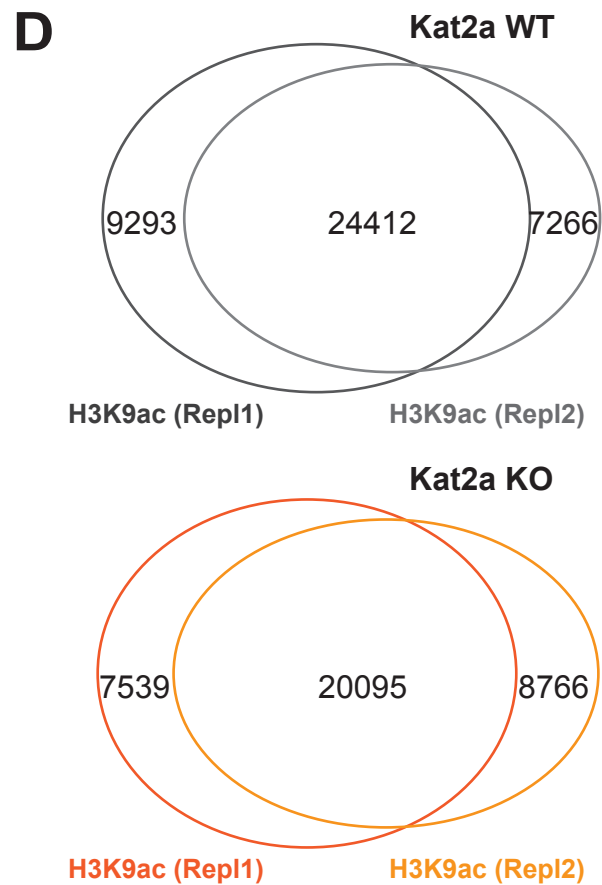

E

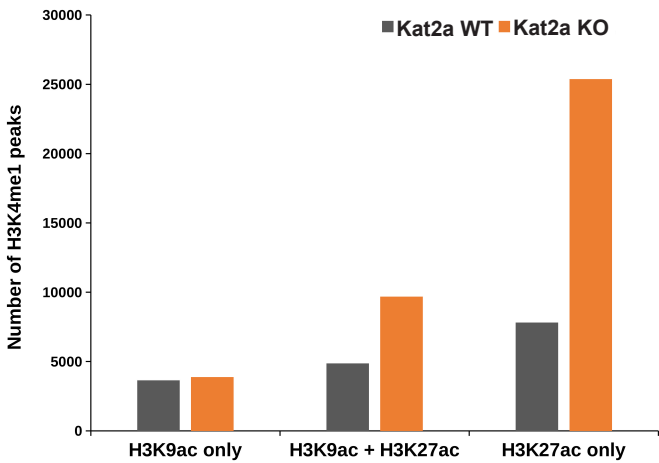

Supplement: supp [file elife-51754-supp-v1.zip]

Figure 1 – figure supplement 1

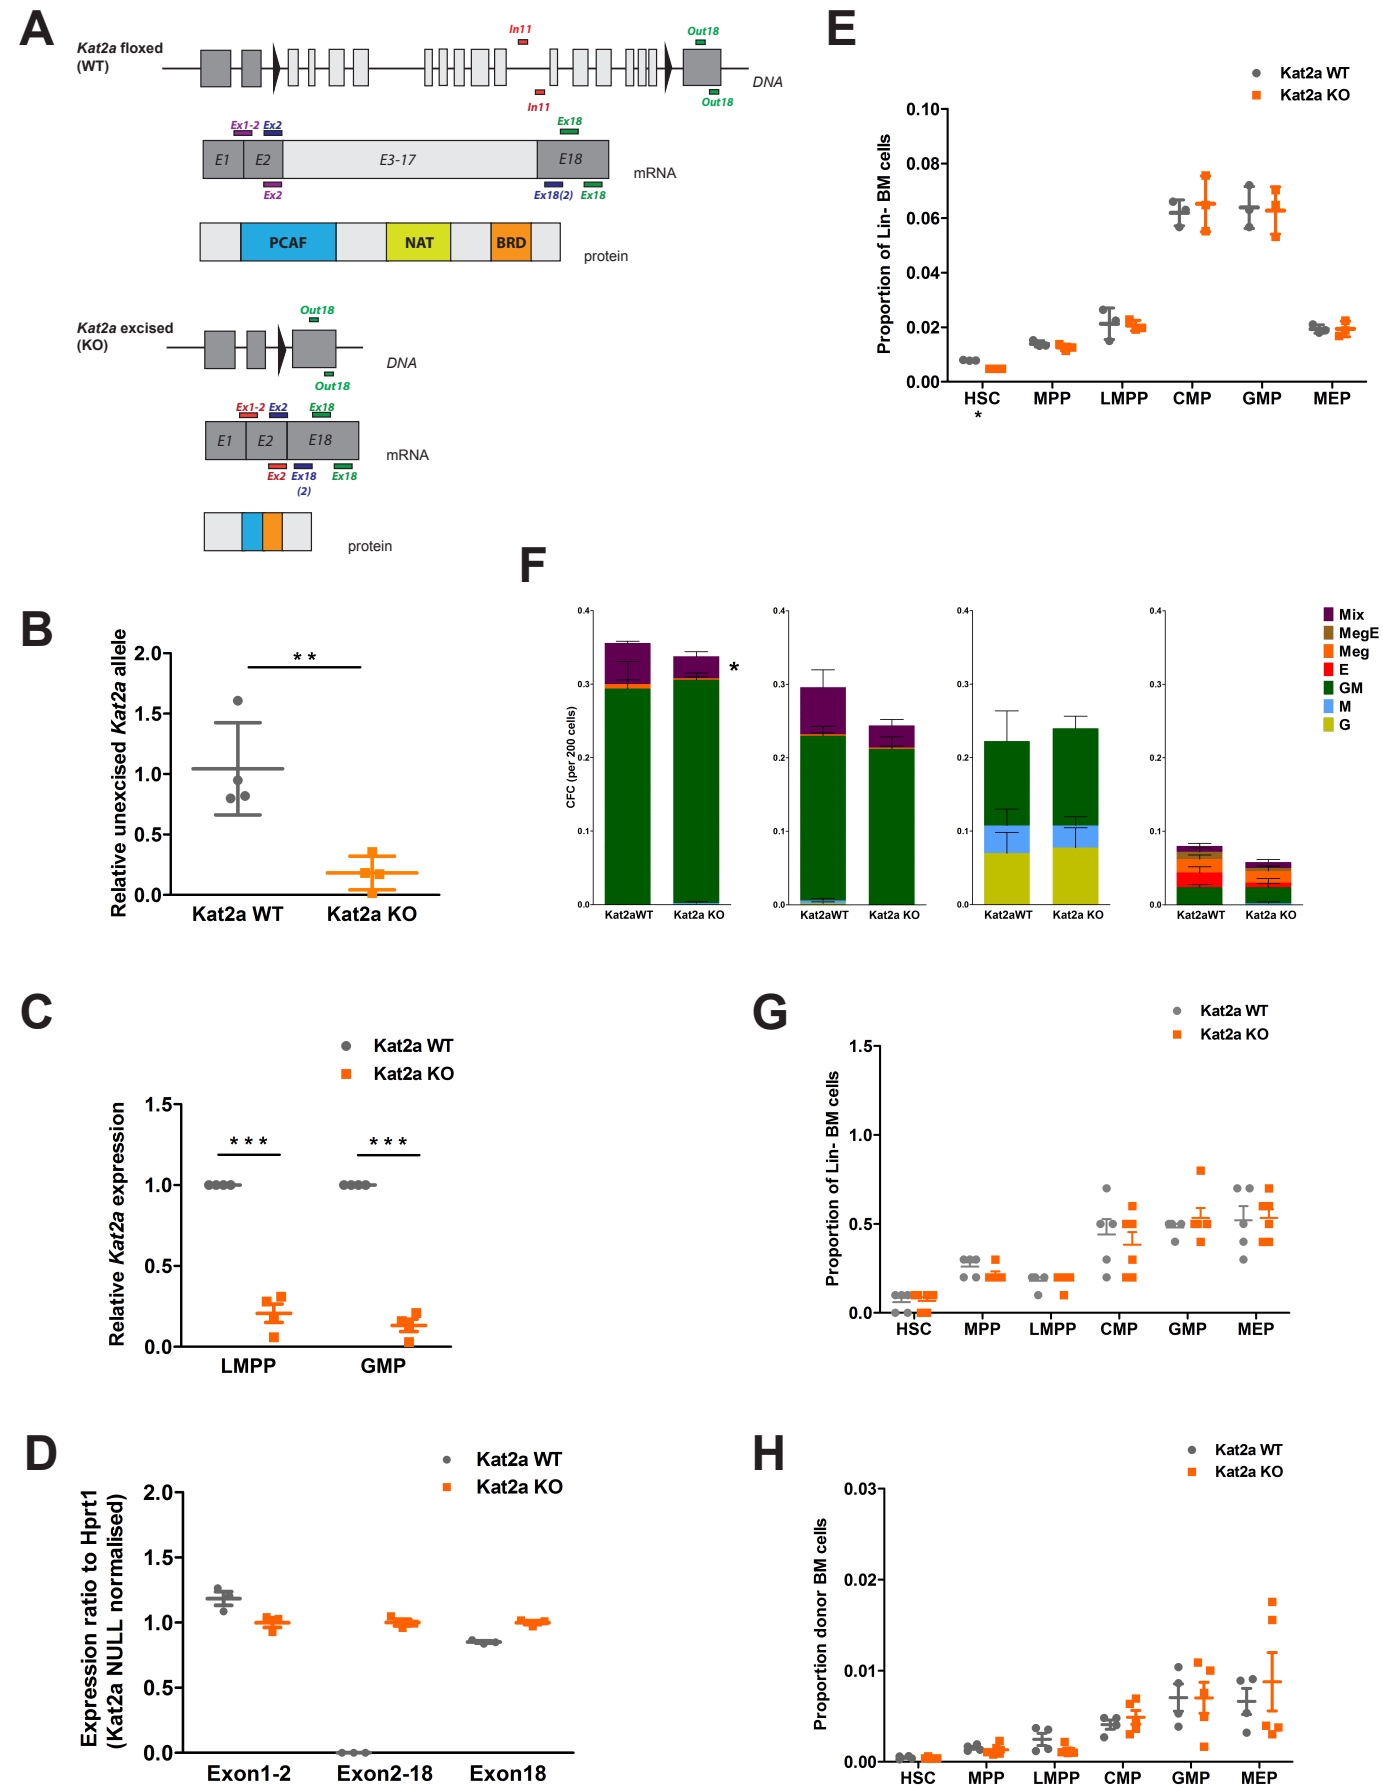

Supplement: supp [file elife-51754-supp-v1.zip]

Figure 5 - figure supplement 2

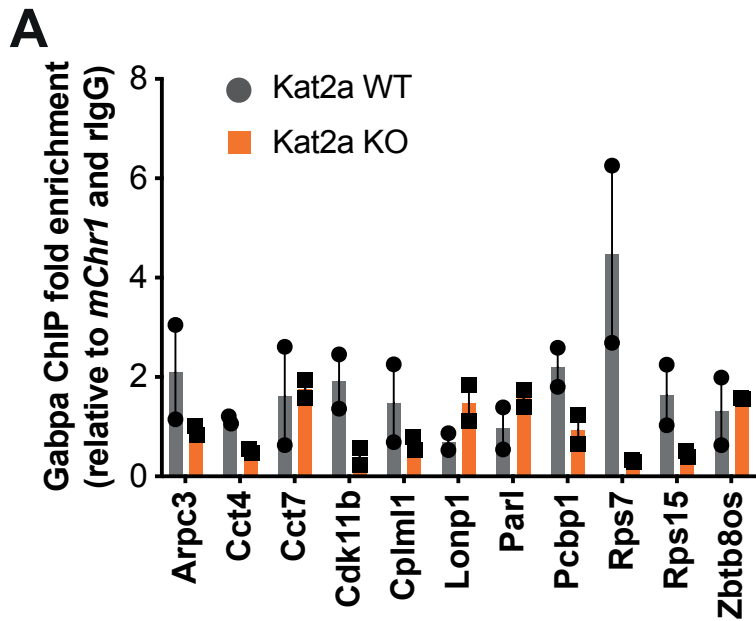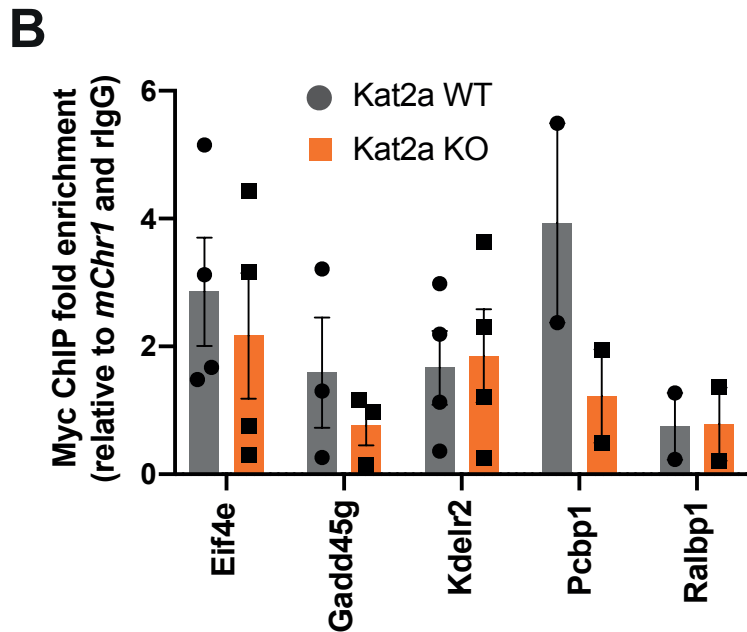

Supplement: supp [file elife-51754-supp-v1.zip › elife_poa_e51754_Figure_5_figure_supplement_2.pdf]

Figure 3 – figure supplement 1

A

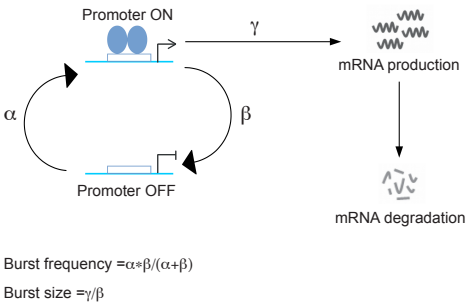

B

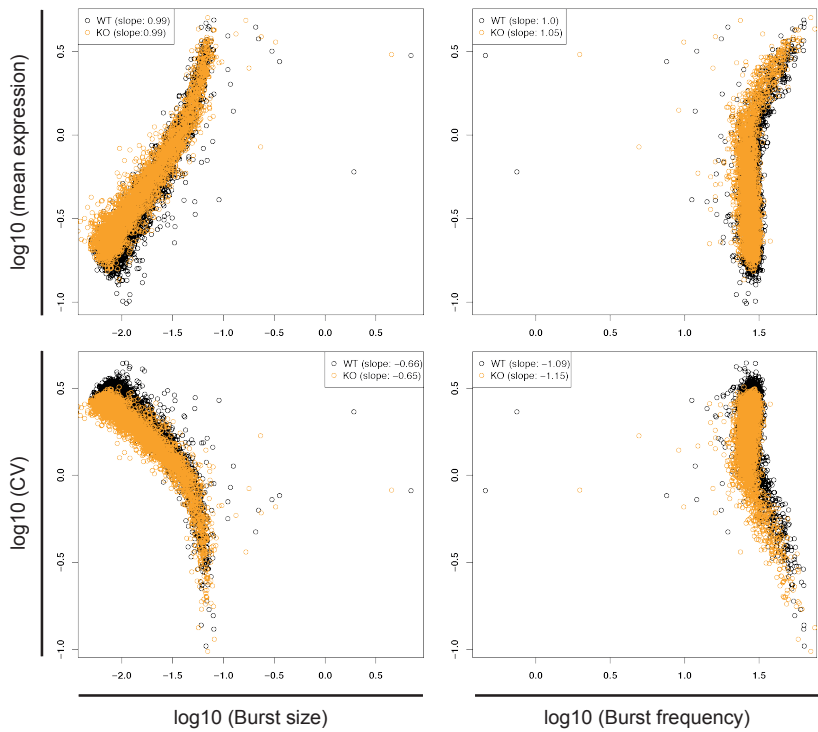

Supplement: supp [file elife-51754-supp-v1.zip › elife_poa_e51754_Figure_3_figure_supplement_1.pdf]

Figure 4 - figure supplement 1

**A**

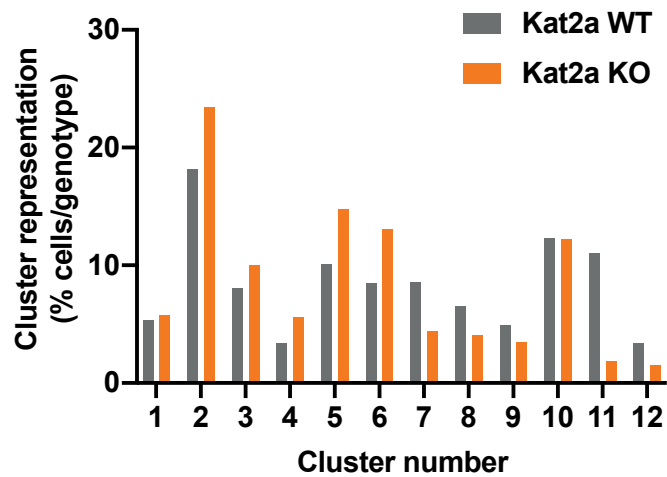

**B**

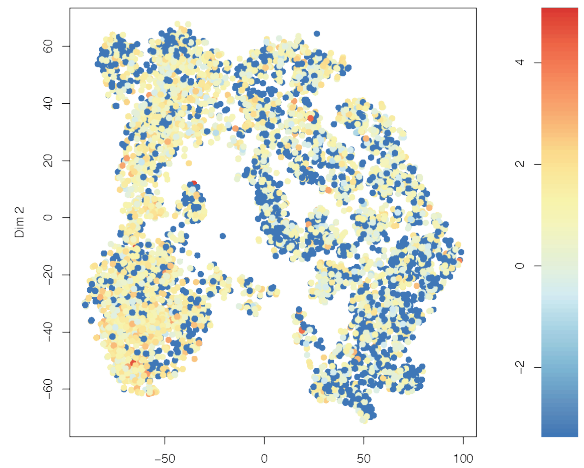

**C**

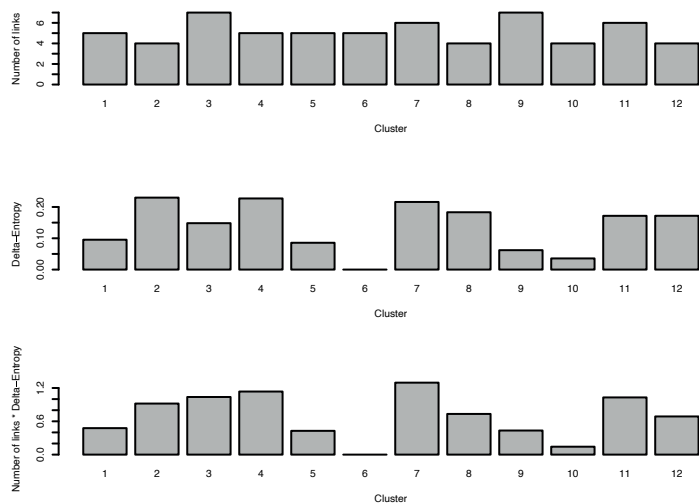

**D**

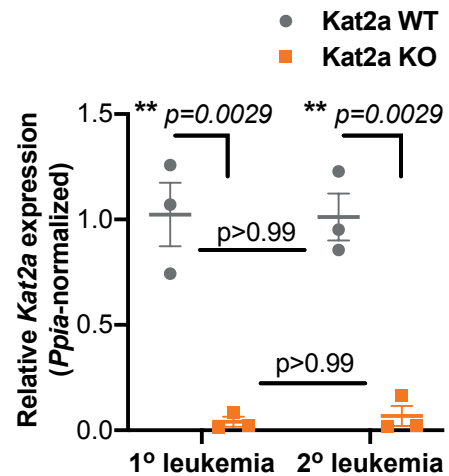

**E**

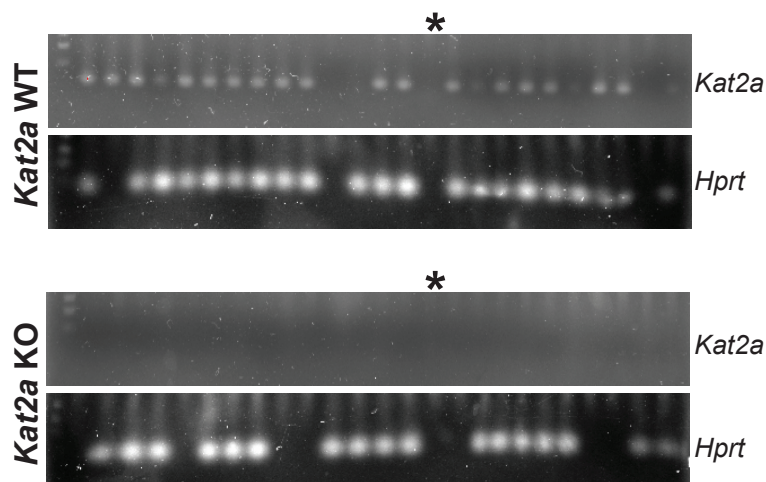

**F**

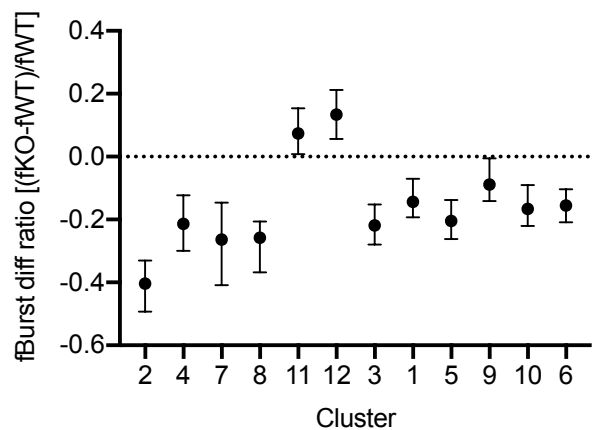

Supplement: supp [file elife-51754-supp-v1.zip › elife_poa_e51754_Figure_4_figure_supplement_1.pdf]

Figure 1 - figure supplement 2

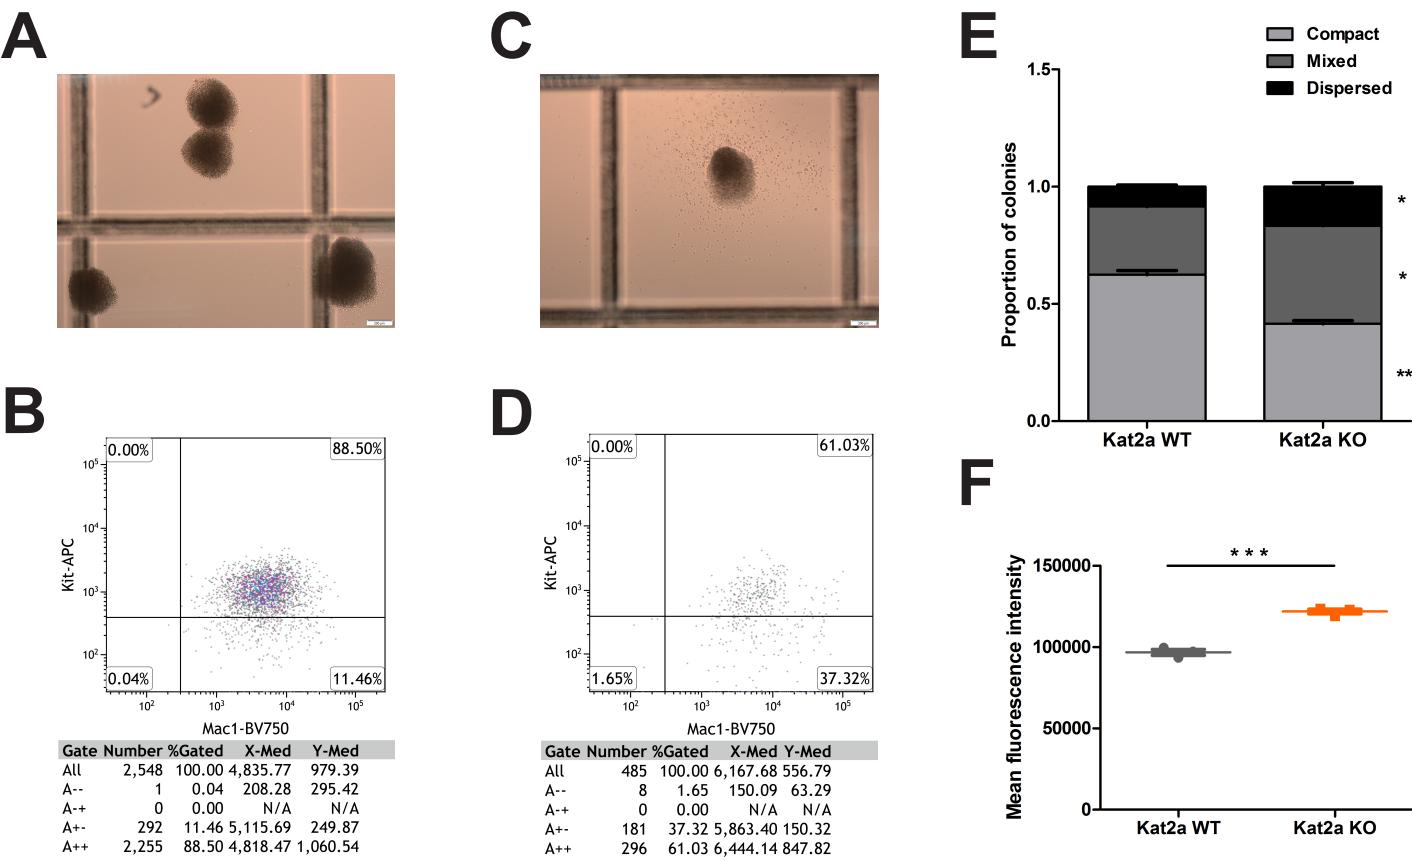

Supplement: supp [file elife-51754-supp-v1.zip › elife_poa_e51754_Figure_1_figure_supplement_2.pdf]

Figure 4 - figure supplement 2

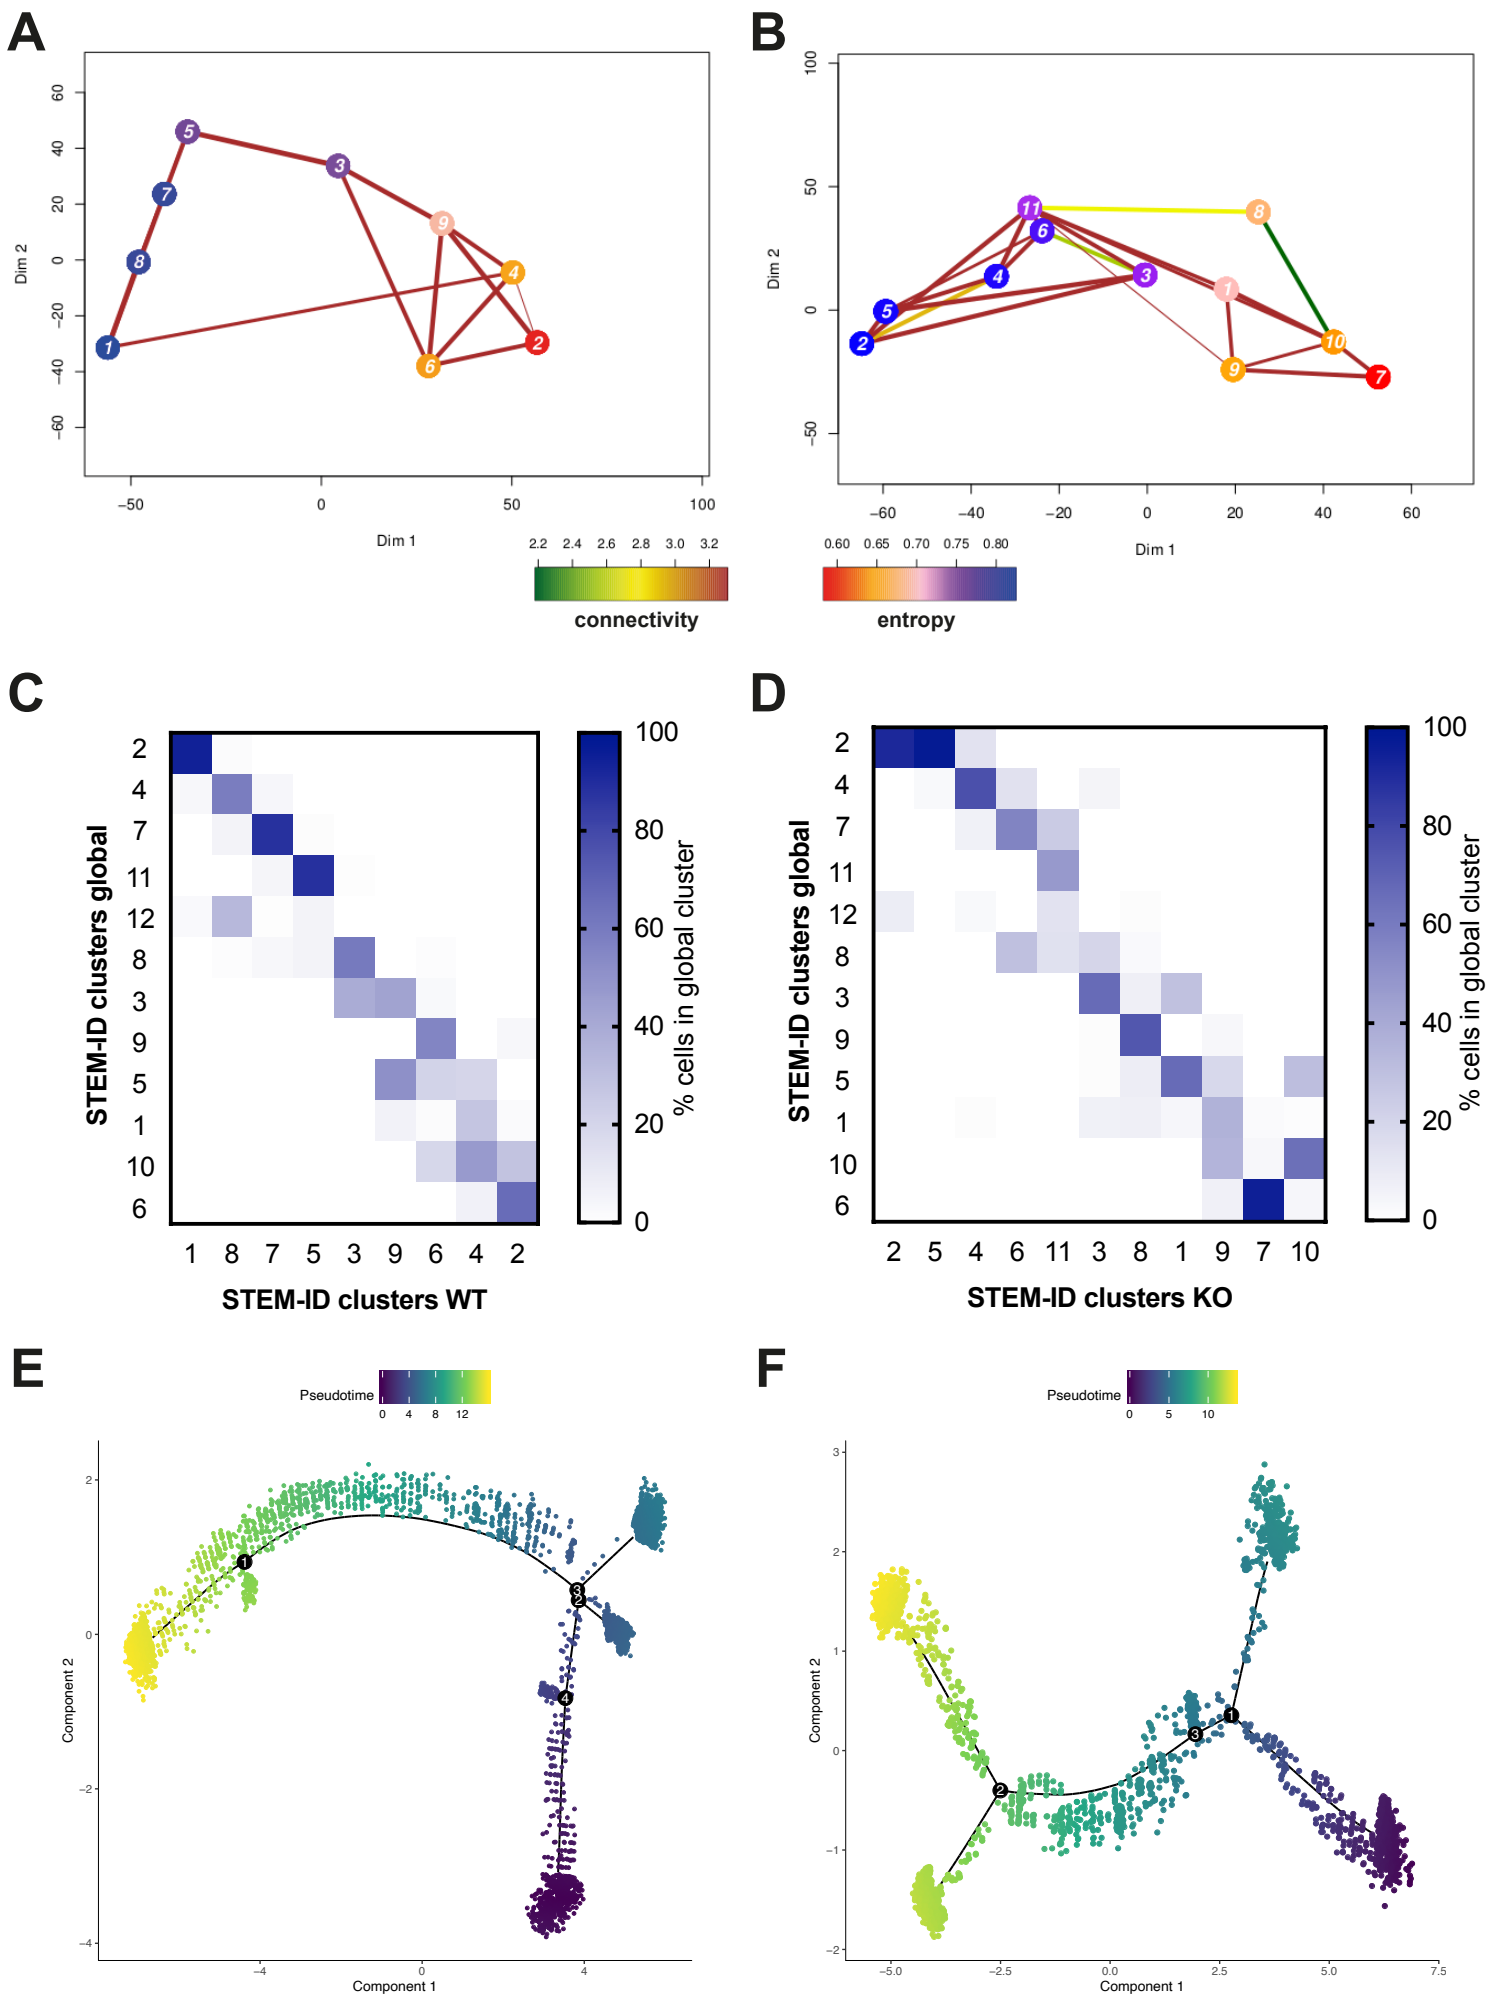

Supplement: supp [file elife-51754-supp-v1.zip › elife_poa_e51754_Figure_4_figure_supplement_2.pdf]

Figure 2 – figure supplement 1

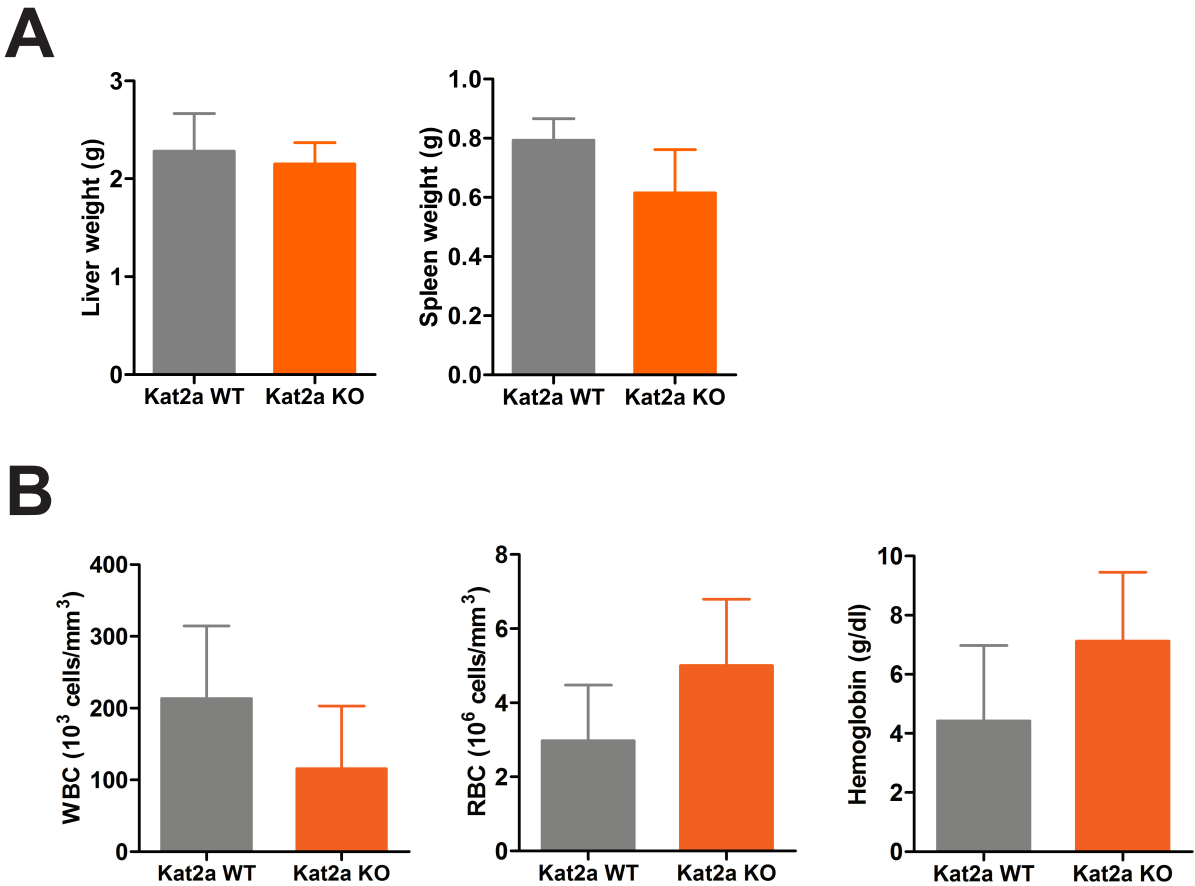

Supplement: supp [file elife-51754-supp-v1.zip › elife_poa_e51754_Figure_2_figure_supplement_1.pdf]
